# Supplementary material for: Zinc chloride-catalyzed Grignard addition reaction of aromatic nitriles
Source: Royal Society of Chemistry journal article supplement (doi:10.1039/d4sc01659a), 2024-01-01
Supplement: d4sc01659a1.pdf [file d4sc01659a1.pdf]

## Supporting Information

### Zinc Chloride-Catalyzed Grignard Addition Reaction of Aromatic Nitriles

Manabu Hatano,<sup>\*a</sup> Kisara Kuwano,<sup>a</sup> Riho Asukai,<sup>a</sup> Ayako Nagayoshi,<sup>a</sup> Haruka Hoshihara,<sup>a</sup>  
Tsubasa Hirata,<sup>a</sup> Miho Umezawa,<sup>b</sup> Sahori Tsubaki,<sup>b</sup> Takeshi Yoshikawa,<sup>\*b</sup> Ken Sakata<sup>\*b</sup>

<sup>a</sup> Faculty of Pharmaceutical Sciences, Kobe Pharmaceutical University, 4-19-1, Motoyamakita-machi,  
Higashinada, Kobe 658-8558, Japan

<sup>b</sup> Faculty of Pharmaceutical Sciences, Toho University, Miyama, Funabashi, Chiba 274-8510, Japan

#### Table of Contents:

|                                                                                                                                                                                        |               |
|----------------------------------------------------------------------------------------------------------------------------------------------------------------------------------------|---------------|
| 1. General information.                                                                                                                                                                | S2            |
| 2. Representative procedure for the alkyl addition to aromatic nitriles <b>1</b><br>with Grignard reagents <b>2</b> and stoichiometric amount of ZnCl <sub>2</sub> (Table 1, entry 4). | S3            |
| 3. General procedure for the ZnCl <sub>2</sub> -catalyzed alkyl addition to aromatic nitriles <b>1</b><br>with Grignard reagents <b>2</b> (Schemes 2 and 3).                           | S3            |
| 4. Products (Table 1 and Scheme 2).                                                                                                                                                    | S4            |
| 5. Products (Eqs. 1–3).                                                                                                                                                                | S7            |
| 6. Products (Scheme 3).                                                                                                                                                                | S8            |
| 7. General procedure for the amine ( <b>5</b> ) synthesis <i>via</i> ZnCl <sub>2</sub> -catalyzed<br>Grignard addition reaction of aromatic nitriles <b>1</b> (Scheme 4).              | S12           |
| 8. Gram-scale ketone <b>3jj</b> synthesis by the ZnCl <sub>2</sub> -catalyzed<br>Grignard addition reaction of aromatic nitrile <b>1j</b> (Scheme 5a).                                 | S14           |
| 9. Scalable ZnCl <sub>2</sub> -catalyzed Grignard addition reaction of aromatic nitrile <b>1a</b><br>and sequential alkyl addition to the resulting ketone (Scheme 5b).                | S15           |
| 10. Computational details.                                                                                                                                                             | S16           |
| 11. References.                                                                                                                                                                        | S94           |
| Appendix: <sup>1</sup> H and <sup>13</sup> C spectra.                                                                                                                                  | S-A1 to S-A38 |

## 1. General information.

<sup>1</sup>H NMR spectra were measured on a JEOL ECZ400 (400 MHz) spectrometer at ambient temperature. Data were recorded as follows: chemical shift in ppm from internal tetramethylsilane on the  $\delta$  scale, multiplicity (s = singlet; d = doublet; t = triplet; q = quartet, m = multiplet, br = broad), coupling constant (Hz), integration, and assignment. <sup>13</sup>C NMR spectra were measured on a JEOL ECZ400 (100 MHz) spectrometer. Chemical shifts were recorded in ppm from the solvent resonance employed as the internal standard (deuteriochloroform at 77.10 ppm). <sup>19</sup>F NMR spectra were measured on a JEOL ECS-400 (376 MHz) spectrometer. Chemical shifts were recorded in ppm from the solvent resonance employed as the external standard (CFCl<sub>3</sub> at 0 ppm). JEOL Delta (v6.1.0) was used as NMR processing software. Infrared (IR) spectra were recorded on a JASCO FT/IR-4600 spectrometer. Melting points were measured on Stanford Research Systems MPA100. High resolution mass spectral analyses were measured on Thermo Scientific Exactive Orbitrap ESI mass spectrometer. The products were purified using column chromatography on silica gel (Kanto Chemical Co., Inc. 37560). For thin-layer chromatography (TLC) analysis throughout this work, Merck precoated TLC plates (silica gel 60GF254 0.25 mm) were used. Visualization was accomplished by UV light (254 nm), anisaldehyde, KMnO<sub>4</sub>, and phosphomolybdic acid. Dry solvents, such as tetrahydrofuran (THF), were purchased, and were used without any purification. Aromatic nitriles **1**, (*N,N,N',N'*-tetramethylethylenediamine)zinc(II) dichloride, *n*-butylmagnesium chloride (**2a**, 1.0 *M* in THF, and 2.0 *M* in THF), *n*-butylmagnesium bromide (**2a'**, 1.0 *M* in THF), methylmagnesium chloride (**2b**, 3.0 *M* in THF), ethylmagnesium chloride (**2c**, 1.0 *M* in THF), isobutylmagnesium chloride (**2d**, 2.0 *M* in THF), benzylmagnesium chloride (**2e**, 1.0 *M* in THF), phenethylmagnesium chloride (**2f**, 1.0 *M* in THF), *n*-octylmagnesium chloride (**2g**, 2.0 *M* in THF), cyclopentylmagnesium chloride (**2h**, 2.0 *M* in Et<sub>2</sub>O), phenylmagnesium bromide (**2i**, 1.0 *M* in THF), isopropylmagnesium chloride (**2j**, 1.0 *M* in THF, and 2.0 *M* in THF) were commercially available and used without purification. Zinc chloride was commercially available and used without purification, and melt-dried (>300 °C) with a heat gun under reduced pressure (<5 Torr) for 5 min prior to use. The values of the yields for major products are based on isolation after silica gel column chromatography unless otherwise noted.

**2. Representative procedure for the alkyl addition to aromatic nitriles 1 with Grignard reagents 2 and stoichiometric amount of ZnCl<sub>2</sub> (Table 1, entry 4).**

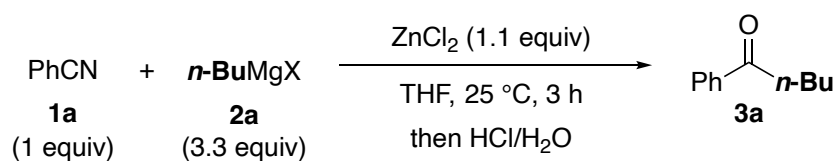

To a two-necked round flask, zinc chloride (300 mg, 2.2 mmol) was added and melt-dried (>300 °C) by a heat gun under reduced pressure (<5 Torr) for 5 min. Grignard reagent *n*-BuMgCl **2a** (1.0 M in THF, 6.6 mL, 6.6 mmol) was added, and the solution was stirred at 25 °C for 30 min. Benzonitrile **1a** (204 μL, 2.0 mmol) was added, and the mixture was stirred at 25 °C for 3 h. The reaction was monitored by TLC. The mixture was then cooled to 0 °C, and diethyl ether (30 mL) and 1 M HCl aqueous solution (50 mL) were added. The mixture was stirred at 25 °C for 1 h, and then extracted with diethyl ether (30 mL × 3). The combined organic phase was washed with brine (50 mL) and dried over MgSO<sub>4</sub>. The solution was concentrated under reduced pressure, and the resultant residue was purified by silica gel column chromatography (eluent: *n*-hexane:EtOAc = 20:1 to 2:1) to give the desired product **3a** (250 mg, 77% yield).

**3. General procedure for the ZnCl<sub>2</sub>-catalyzed alkyl addition to aromatic nitriles 1 with Grignard reagents 2 (Schemes 2 and 3).**

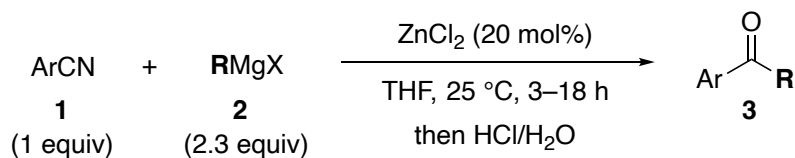

To a two-necked round flask, zinc chloride (54.5 mg, 0.40 mmol) was added and melt-dried (>300 °C) by a heat gun under reduced pressure (<5 Torr) for 5 min. Grignard reagent RMgX **2** (1.0–3.0 M in THF or Et<sub>2</sub>O, 4.6 mmol) and THF were added, and the solution was stirred at 25 °C for 30 min (If a Grignard reagent is >1.0 M, the solution of the Grignard reagent is diluted with THF to 1.0 M). Nitrile **1** (2.0 mmol) was added, and the mixture was stirred at 25 °C for 3–18 h. The reaction was monitored by TLC. The mixture was then cooled to 0 °C, and diethyl ether (20 mL) and 1 M HCl aqueous solution (20 mL) were added. The mixture was stirred at 25 °C for 1 h, and then extracted with diethyl ether (20 mL × 3). The combined organic phase was washed with brine (20 mL) and dried over MgSO<sub>4</sub>. The solution was concentrated under reduced pressure, and the resultant residue was purified by silica gel column chromatography (eluent: *n*-hexane:EtOAc = 20:1 to 2:1) to give the desired product **3**.

#### 4. Products (Table 1 and Scheme 2).

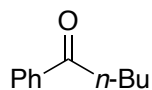

**1-Phenylpentan-1-one (3aa):**<sup>1</sup> 309 mg, 95% yield (6 h) (Table 1 and Scheme 2). Colorless oil. <sup>1</sup>H NMR (400 MHz, CDCl<sub>3</sub>) δ 7.96 (d, *J* = 7.6 Hz, 2H), 7.54 (t, *J* = 7.6 Hz, 1H), 7.45 (t, *J* = 7.6 Hz, 2H), 2.96 (t, *J* = 7.2 Hz, 2H), 1.72 (quintet, *J* = 7.2 Hz, 2H), 1.41 (sextet, *J* = 7.2 Hz, 2H), 0.95 (t, *J* = 7.2 Hz, 3H). <sup>13</sup>C NMR (100 MHz, CDCl<sub>3</sub>) δ 200.6, 137.1, 132.9, 128.5 (2C), 128.0 (2C), 38.3, 26.5, 22.5, 13.9. IR (film) 2958, 2871, 1685, 1596, 1448, 1265, 1207, 1012 cm<sup>-1</sup>. HRMS (ESI+) *m/z*: [M+H]<sup>+</sup> Calcd for C<sub>11</sub>H<sub>15</sub>O 163.1117; Found 163.1116.

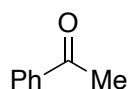

**Acetophenone (3ab):**<sup>2</sup> 217 mg, 90% yield (3 h) (Scheme 2). Colorless oil. <sup>1</sup>H NMR (400 MHz, CDCl<sub>3</sub>) δ 7.97 (d, *J* = 7.6 Hz, 2H), 7.56 (t, *J* = 7.6 Hz, 1H), 7.46 (t, *J* = 7.6 Hz, 2H), 2.61 (s, 3H). <sup>13</sup>C NMR (100 MHz, CDCl<sub>3</sub>) δ 198.2, 137.1, 133.1, 128.6 (2C), 128.4 (2C), 26.6. IR (film) 1679, 1597, 1448, 1357, 1262, 1179, 1024 cm<sup>-1</sup>. HRMS (ESI+) *m/z*: [M+Na]<sup>+</sup> Calcd for C<sub>8</sub>H<sub>8</sub>NaO 143.0467; Found 143.0469.

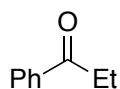

**Propiophenone (3ac):**<sup>3</sup> 269 mg, >99% yield (3 h) (Scheme 2). Colorless oil. <sup>1</sup>H NMR (400 MHz, CDCl<sub>3</sub>) δ 7.96 (d, *J* = 7.6 Hz, 2H), 7.55 (t, *J* = 7.6 Hz, 1H), 7.46 (t, *J* = 7.6 Hz, 2H), 3.01 (q, *J* = 7.6 Hz, 2H), 1.23 (t, *J* = 7.2 Hz, 3H). <sup>13</sup>C NMR (100 MHz, CDCl<sub>3</sub>) δ 200.9, 136.9, 132.9, 128.6 (2C), 128.0 (2C), 31.8, 8.3. IR (film) 2978, 2938, 1686, 1596, 1449, 1352, 1220, 1078, 1014 cm<sup>-1</sup>. HRMS (ESI+) *m/z*: [M+H]<sup>+</sup> Calcd for C<sub>9</sub>H<sub>11</sub>O 135.0804; Found 135.0806.

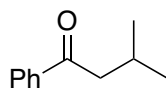

**3-Methyl-1-phenylbutan-1-one (3ad):**<sup>4</sup> 293 mg, 90% yield (6 h) (Scheme 2). Pale yellow oil. <sup>1</sup>H NMR (400 MHz, CDCl<sub>3</sub>) δ 7.95 (d, *J* = 6.8 Hz, 2H), 7.54 (t, *J* = 6.4 Hz, 1H), 7.45 (t, *J* = 6.4 Hz, 2H), 2.83 (d, *J* = 6.8 Hz, 2H), 2.30 (septet, *J* = 6.4 Hz, 1H), 1.00 (d, *J* = 6.4 Hz, 6H). <sup>13</sup>C NMR (100 MHz, CDCl<sub>3</sub>) δ 200.3, 137.4, 132.9, 128.5 (2C), 128.1 (2C), 47.5, 25.2, 22.8 (2C). IR (film) 2957, 2870, 1685, 1597, 1580, 1467, 1448, 1365, 1284, 1213, 1005 cm<sup>-1</sup>. HRMS (ESI+) *m/z*: [M+H]<sup>+</sup> Calcd for C<sub>11</sub>H<sub>15</sub>O 163.1117; Found 163.1117.



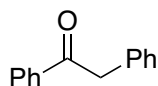

**1,2-Diphenylethan-1-one (3ae):**<sup>5</sup> 352 mg, 90% yield (3 h) (Scheme 2). White solid. <sup>1</sup>H NMR (400 MHz, CDCl<sub>3</sub>) δ 8.01 (d, *J* = 7.2 Hz, 2H), 7.55 (t, *J* = 8.0 Hz, 1H), 7.45 (t, *J* = 8.0 Hz, 2H), 7.32 (t, *J* = 7.2 Hz, 2H), 7.30-7.22 (m, 3H), 4.28 (s, 2H). <sup>13</sup>C NMR (100 MHz, CDCl<sub>3</sub>) δ 197.6, 136.6, 134.5, 133.2, 129.5 (2C), 128.5 (2C), 128.7 (2C), 128.6 (2C), 126.9, 45.5. IR (film) 3027, 1685, 1448, 1411, 1337, 1076 cm<sup>-1</sup>. M.p. 56-57 °C. HRMS (ESI+) *m/z*: [M+H]<sup>+</sup> Calcd for C<sub>14</sub>H<sub>13</sub>O 197.0961; Found 197.0961.

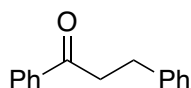

**1,3-Diphenylpropan-1-one (3af):**<sup>6</sup> 295 mg, 70% yield (3 h) (Scheme 2). White solid. <sup>1</sup>H NMR (400 MHz, CDCl<sub>3</sub>) δ 7.96 (d, *J* = 6.9 Hz, 2H), 7.55 (t, *J* = 7.2 Hz, 1H), 7.45 (t, *J* = 8.0 Hz, 2H), 7.30 (t, *J* = 7.6 Hz, 2H), 7.28-7.23 (m, 2H), 7.20 (t, *J* = 6.9 Hz, 1H), 3.31 (d, *J* = 7.2 Hz, 2H), 3.07 (d, *J* = 7.4 Hz, 2H). <sup>13</sup>C NMR (100 MHz, CDCl<sub>3</sub>) δ 199.2, 141.3, 136.8, 133.1, 128.7 (2C), 128.6 (2C), 128.4 (2C), 128.0 (2C), 126.1, 40.4, 30.1. IR (film) 3026, 2928, 1685, 1597, 1494, 1449, 1363, 1290, 1205 cm<sup>-1</sup>. M.p. 71-74 °C. HRMS (ESI+) *m/z*: [M+Na]<sup>+</sup> Calcd for C<sub>15</sub>H<sub>14</sub>NaO 233.0937; Found 233.0937.

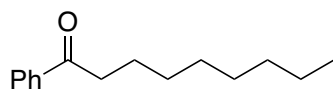

**1-Phenylnonan-1-one (3ag):**<sup>7</sup> 395 mg, 90% yield (3 h) (Scheme 2). Colorless oil. <sup>1</sup>H NMR (400 MHz, CDCl<sub>3</sub>) δ 7.95 (d, *J* = 6.9 Hz, 2H), 7.54 (t, *J* = 7.2 Hz, 1H), 7.45 (t, *J* = 7.2 Hz, 2H), 2.96 (t, *J* = 7.6 Hz, 2H), 1.73 (m, 2H), 1.45-1.20 (m, 10H), 0.88 (t, *J* = 6.9 Hz, 3H). <sup>13</sup>C NMR (100 MHz, CDCl<sub>3</sub>) δ 200.6, 137.1, 132.9, 128.5 (2C), 128.0 (2C), 38.6, 31.8, 29.5, 29.4, 29.2, 24.4, 22.7, 14.1. IR (film) 2926, 2855, 1686, 1597, 1580, 1449, 1408, 1370, 1216, 1001 cm<sup>-1</sup>. HRMS (ESI+) *m/z*: [M+Na]<sup>+</sup> Calcd for C<sub>15</sub>H<sub>22</sub>NaO 241.1563; Found 241.1562.

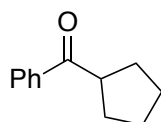

**Cyclopentyl(phenyl)methanone (3ah):**<sup>8</sup> 288 mg, 83% yield (6 h) (Scheme 2). Pale yellow oil. <sup>1</sup>H NMR (400 MHz, CDCl<sub>3</sub>) δ 7.97 (d, *J* = 7.6 Hz, 2H), 7.53 (t, *J* = 7.6 Hz, 1H), 7.45 (t, *J* = 7.2 Hz, 2H), 3.71 (quintet, *J* = 7.6 Hz, 1H), 2.00-1.85 (m, 4H), 1.80-1.60 (m, 4H). <sup>13</sup>C NMR (100 MHz, CDCl<sub>3</sub>) δ 202.8, 136.9, 132.7, 128.5 (2C), 128.4 (2C), 16.3, 30.0 (2C), 26.3 (2C). IR (film) 2952, 2868, 1678, 1596, 1579, 1448, 1360, 1220, 1179, 1001 cm<sup>-1</sup>. HRMS (ESI+) *m/z*: [M+H]<sup>+</sup> Calcd for C<sub>12</sub>H<sub>15</sub>O 175.1117; Found 175.1117.

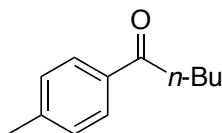

**1-(*p*-Tolyl)pentan-1-one (3ba):**<sup>9</sup> 308 mg, 87% yield (9 h) (Scheme 2). Colorless oil. <sup>1</sup>H NMR (400 MHz, CDCl<sub>3</sub>) δ 7.85 (d, *J* = 8.0 Hz, 2H), 7.23 (d, *J* = 8.0 Hz, 2H), 2.91 (t, *J* = 7.2 Hz, 2H), 2.38 (s, 3H), 1.70 (quintet, *J* = 7.2 Hz, 2H), 1.41 (sextet, *J* = 7.2 Hz, 2H), 0.94 (t, *J* = 7.2 Hz, 3H). <sup>13</sup>C NMR (100 MHz, CDCl<sub>3</sub>) δ 200.1, 143.4, 134.5, 128.9 (2C), 128.1 (2C), 38.1, 26.5, 22.4, 21.5, 13.9. IR (film) 2958, 1683, 1607, 1464, 1408, 1267, 1204, 1180, 1014 cm<sup>-1</sup>. HRMS (ESI+) *m/z*: [M+H]<sup>+</sup> Calcd for C<sub>12</sub>H<sub>17</sub>O 177.1274; Found 177.1275.

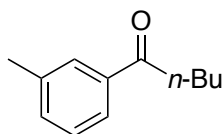

**1-(*m*-Tolyl)pentan-1-one (3ca):**<sup>9</sup> 303 mg, 86% yield (6 h) (Scheme 2). Colorless oil. <sup>1</sup>H NMR (400 MHz, CDCl<sub>3</sub>) δ 7.79-7.73 (m, 2H), 7.38-7.30 (m, 2H), 2.94 (t, *J* = 7.2 Hz, 2H), 2.40 (s, 3H), 1.72 (quintet, *J* = 7.2 Hz, 2H), 1.40 (sextet, *J* = 7.2 Hz, 2H), 0.95 (t, *J* = 7.2 Hz, 3H). <sup>13</sup>C NMR (100 MHz, CDCl<sub>3</sub>) δ 200.8, 138.3, 137.1, 133.6, 128.5, 128.4, 125.3, 38.4, 26.5, 22.5, 21.4, 14.0. IR (film) 2958, 1684, 1603, 1582, 1464, 1260, 1162, 1041 cm<sup>-1</sup>. HRMS (ESI+) *m/z*: [M+H]<sup>+</sup> Calcd for C<sub>12</sub>H<sub>17</sub>O 177.1274; Found 177.1275.

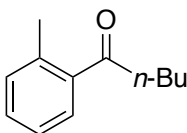

**1-(*o*-Tolyl)pentan-1-one (3da):**<sup>9</sup> 316 mg, 90% yield (6 h) (Scheme 2). Colorless oil. <sup>1</sup>H NMR (400 MHz, CDCl<sub>3</sub>) δ 7.61 (d, *J* = 7.2 Hz, 1H), 7.36 (t, *J* = 7.6 Hz, 1H), 7.26 (t, *J* = 7.6 Hz, 1H), 7.24 (d, *J* = 7.6 Hz, 1H), 2.88 (t, *J* = 7.6 Hz, 2H), 2.48 (s, 3H), 1.68 (quintet, *J* = 7.2 Hz, 2H), 1.39 (sextet, *J* = 7.2 Hz, 2H), 0.94 (t, *J* = 7.2 Hz, 3H). <sup>13</sup>C NMR (100 MHz, CDCl<sub>3</sub>) δ 205.0, 138.4, 137.8, 131.9, 131.0, 128.3, 125.6, 41.4, 26.5, 22.5, 21.2, 14.0. IR (film) 2958, 1686, 1600, 1571, 1456, 1258, 1211, 1009 cm<sup>-1</sup>. HRMS (ESI+) *m/z*: [M+H]<sup>+</sup> Calcd for C<sub>12</sub>H<sub>17</sub>O 177.1274; Found 177.1275.

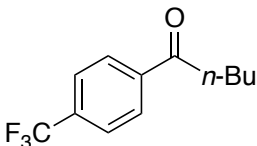

**1-(4-(Trifluoromethyl)phenyl)pentan-1-one (3ea):**<sup>9</sup> 462 mg, >99% yield (3 h) (Scheme 2). Colorless oil. <sup>1</sup>H NMR (400 MHz, CDCl<sub>3</sub>) δ 8.06 (d, *J* = 8.8 Hz, 2H), 7.72 (d, *J* = 8.8 Hz, 2H), 2.99 (t, *J* = 7.2 Hz, 2H), 1.74 (quintet, *J* = 7.2 Hz, 2H), 1.42 (sextet, *J* = 7.2 Hz, 2H), 0.96 (t, *J* =

7.2 Hz, 3H).  $^{13}\text{C}$  NMR (100 MHz,  $\text{CDCl}_3$ )  $\delta$  199.5, 139.7, 134.2 (q,  $J_{\text{C-F}} = 32.6$  Hz), 128.4 (2C), 125.7 (q,  $J_{\text{C-F}} = 3.8$  Hz, 2C), 123.7 (q,  $J_{\text{C-F}} = 271.2$  Hz), 38.7, 26.2, 22.4, 13.9.  $^{19}\text{F}$  (376 MHz,  $\text{CDCl}_3$ )  $\delta$  -63.6. IR (film) 2932, 1687, 1580, 1467, 1409, 1326, 1113, 1068  $\text{cm}^{-1}$ . HRMS (ESI+)  $m/z$ :  $[\text{M}+\text{H}]^+$  Calcd for  $\text{C}_{12}\text{H}_{14}\text{F}_3\text{O}$  231.0991; Found 231.0991.

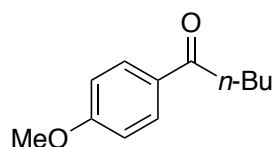

**1-(4-Methoxyphenyl)pentan-1-one (3fa):**<sup>10</sup> 379 mg, 99% yield (6 h) (Scheme 2). Colorless oil.  $^1\text{H}$  NMR (400 MHz,  $\text{CDCl}_3$ )  $\delta$  7.94 (d,  $J = 6.8$  Hz, 2H), 6.92 (d,  $J = 6.8$  Hz, 2H), 3.86 (s, 3H), 2.91 (t,  $J = 7.2$  Hz, 2H), 1.71 (quintet,  $J = 7.2$  Hz, 2H), 1.40 (sextet,  $J = 7.2$  Hz, 2H), 0.95 (t,  $J = 7.2$  Hz, 3H).  $^{13}\text{C}$  NMR (100 MHz,  $\text{CDCl}_3$ )  $\delta$  199.2, 163.3, 130.3 (2C), 113.6 (2C), 130.1, 55.4, 38.0, 26.7, 22.5, 14.0. IR (film) 2957, 1676, 1601, 1509, 1462, 1471, 1257, 1212, 1170, 1030  $\text{cm}^{-1}$ . HRMS (ESI+)  $m/z$ :  $[\text{M}+\text{H}]^+$  Calcd for  $\text{C}_{12}\text{H}_{17}\text{O}_2$  193.1223; Found 193.1223.

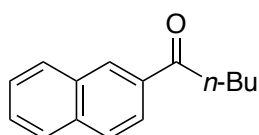

**1-(Naphthalen-2-yl)pentan-1-one (3ga):**<sup>9</sup> 384 mg, 90% yield (3 h) (Scheme 2). White solid.  $^1\text{H}$  NMR (400 MHz,  $\text{CDCl}_3$ )  $\delta$  8.46 (s, 1H), 8.04 (dd,  $J = 8.8, 1.2$  Hz, 1H), 7.95 (d,  $J = 8.4$  Hz, 1H), 7.89 (d,  $J = 8.4$  Hz, 1H), 7.86 (d,  $J = 6.8$  Hz, 1H), 7.59 (td,  $J = 6.8, 0.8$  Hz, 1H), 7.54 (td,  $J = 6.8, 0.8$  Hz, 1H), 3.09 (t,  $J = 8.0$  Hz, 2H), 1.78 (quintet,  $J = 8.0$  Hz, 2H), 1.44 (sextet,  $J = 7.6$  Hz, 2H), 0.98 (t,  $J = 8.0$  Hz, 3H).  $^{13}\text{C}$  NMR (100 MHz,  $\text{CDCl}_3$ )  $\delta$  200.6, 135.5, 134.4, 132.5, 129.6, 129.5, 128.4, 128.3, 127.8, 126.7, 124.0, 38.4, 26.6, 22.5, 14.0. IR (film) 2932, 1681, 1464, 1410, 1357, 1268, 1182, 1157  $\text{cm}^{-1}$ . M.p. 54-56  $^\circ\text{C}$ . HRMS (ESI+)  $m/z$ :  $[\text{M}+\text{H}]^+$  Calcd for  $\text{C}_{15}\text{H}_{17}\text{O}$  213.1274; Found 213.1272.

## 5. Products (Eqs. 1–3).

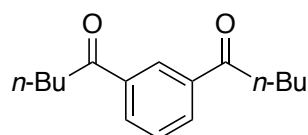

**1,1'-(1,3-Phenylene)bis(pentan-1-one) (3ha'):**<sup>11</sup> 452 mg, 92% yield (3 h) (Eq. 1). White solid.  $^1\text{H}$  NMR (400 MHz,  $\text{CDCl}_3$ )  $\delta$  8.46 (t,  $J = 2.0$  Hz, 1H), 8.15 (dd,  $J = 8.0, 2.0$  Hz, 2H), 7.58 (t,  $J = 8.0$  Hz, 1H), 3.02 (t,  $J = 7.2$  Hz, 4H), 1.74 (quintet,  $J = 7.2$  Hz, 4H), 1.42 (sextet,  $J = 7.2$  Hz, 4H), 0.97 (t,  $J = 7.2$  Hz, 6H).  $^{13}\text{C}$  NMR (100 MHz,  $\text{CDCl}_3$ )  $\delta$  199.9 (2C), 137.4 (2C), 132.1 (2C), 129.0,

127.5, 38.5 (2C), 26.3 (2C), 22.4 (2C), 14.0 (2C). IR (film) 2958, 1687, 1596, 1465, 1376, 1259, 1176, 1036  $\text{cm}^{-1}$ . M.p. 27-28  $^{\circ}\text{C}$ . HRMS (ESI+)  $m/z$ :  $[\text{M}+\text{Na}]^+$  Calcd for  $\text{C}_{16}\text{H}_{22}\text{NaO}_2$  269.1512; Found 269.1506.

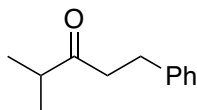

**4-Methyl-1-phenylpentan-3-one (3if):**<sup>12</sup> 70.7 mg, 20% yield (6 h) (Eq. 2). Colorless oil.  $^1\text{H}$  NMR (400 MHz,  $\text{CDCl}_3$ )  $\delta$  7.31-7.16 (m, 5H), 2.88 (t,  $J = 7.2$  Hz, 2H), 2.76 (t,  $J = 7.2$  Hz, 2H), 2.56 (septet,  $J = 6.8$  Hz, 1H), 1.06 (d,  $J = 6.8$  Hz, 6H).  $^{13}\text{C}$  NMR (100 MHz,  $\text{CDCl}_3$ )  $\delta$  213.9, 141.4, 128.5 (2C), 128.3 (2C), 126.1, 42.0, 41.0, 29.8, 18.2 (2C). IR (film) 2969, 1711, 1496, 1454, 1383, 1364, 1079, 1060  $\text{cm}^{-1}$ . HRMS (ESI+)  $m/z$ :  $[\text{M}+\text{Na}]^+$  Calcd for  $\text{C}_{12}\text{H}_{16}\text{NaO}$  199.1093; Found 199.1093.

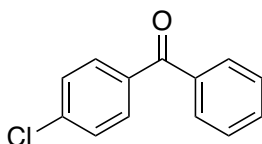

**4-Chlorobenzophenone (3ji):**<sup>13</sup> 233 mg, 54% yield (3 h) (Eq. 3). White solid.  $^1\text{H}$  NMR (400 MHz,  $\text{CDCl}_3$ )  $\delta$  7.81-7.74 (m, 4H), 7.60 (t,  $J = 7.2$  Hz, 1H), 7.52-7.43 (m, 4H).  $^{13}\text{C}$  NMR (100 MHz,  $\text{CDCl}_3$ )  $\delta$  195.5, 138.9, 137.2, 135.9, 132.7, 131.5 (2C), 130.0 (2C), 128.7 (2C), 128.4 (2C). IR (film) 3062, 1660, 1585, 1484, 1447, 1399, 1316, 1273, 1173, 1090  $\text{cm}^{-1}$ . M.p. 75-76  $^{\circ}\text{C}$ . HRMS (ESI+)  $m/z$ :  $[\text{M}+\text{H}]^+$  Calcd for  $\text{C}_{13}\text{H}_{10}\text{ClO}$  217.0415; Found 217.0417.

## 6. Products (Scheme 3).

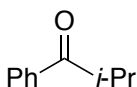

**2-Methyl-1-phenylpropan-1-one (3aj):**<sup>14</sup> 251 mg, 85% yield (6 h) (Scheme 3). Colorless oil.  $^1\text{H}$  NMR (400 MHz,  $\text{CDCl}_3$ )  $\delta$  7.95 (d,  $J = 7.2$  Hz, 2H), 7.55 (t,  $J = 7.2$  Hz, 1H), 7.46 (t,  $J = 7.2$  Hz, 2H), 3.01 (septet,  $J = 6.8$  Hz, 1H), 1.22 (d,  $J = 6.8$  Hz, 6H).  $^{13}\text{C}$  NMR (100 MHz,  $\text{CDCl}_3$ )  $\delta$  204.6, 136.2, 132.8, 128.6 (2C), 128.3 (2C), 35.4, 19.2 (2C). IR (film) 3648, 2933, 1683, 1596, 1578, 1465, 1447, 1383, 1350, 1224, 1160  $\text{cm}^{-1}$ . HRMS (ESI+)  $m/z$ :  $[\text{M}+\text{H}]^+$  Calcd for  $\text{C}_{10}\text{H}_{13}\text{O}$  149.0961; Found 149.0960.

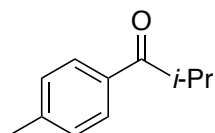

**2-Methyl-1-(*p*-tolyl)propan-1-one (3bj):**<sup>15</sup> 293 mg, 90% yield (6 h) (Scheme 3). Colorless oil. <sup>1</sup>H NMR (400 MHz, CDCl<sub>3</sub>) δ 7.86 (d, *J* = 8.0 Hz, 2H), 7.25 (d, *J* = 8.0 Hz, 2H), 3.53 (septet, *J* = 6.8 Hz, 1H), 2.41 (s, 3H), 1.20 (d, *J* = 6.8 Hz, 6H). <sup>13</sup>C NMR (100 MHz, CDCl<sub>3</sub>) δ 204.2, 143.5, 129.3 (2C), 133.6, 128.5 (2C), 35.2, 21.6, 19.2 (2C). IR (film) 2971, 1681, 1607, 1465, 1381, 1229, 1209, 1160 cm<sup>-1</sup>. HRMS (ESI+) *m/z*: [M+H]<sup>+</sup> Calcd for C<sub>11</sub>H<sub>15</sub>O 163.1117; Found 163.1115.

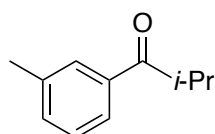

**2-Methyl-1-(*m*-tolyl)propan-1-one (3cj):**<sup>15</sup> 315 mg, 97% yield (6 h) (Scheme 3). Colorless oil. <sup>1</sup>H NMR (400 MHz, CDCl<sub>3</sub>) δ 7.79-7.72 (m, 2H), 7.40-7.32 (m, 2H), 3.55 (septet, *J* = 6.8 Hz, 1H), 2.41 (s, 3H), 1.21 (d, *J* = 6.8 Hz, 6H). <sup>13</sup>C NMR (100 MHz, CDCl<sub>3</sub>) δ 204.8, 138.4, 136.3, 133.6, 128.9, 128.5, 125.5, 35.4, 21.4, 19.2 (2C). IR (film) 2971, 1683, 1602, 1585, 1466, 1382, 1249, 1149, 1029 cm<sup>-1</sup>. HRMS (ESI+) *m/z*: [M+H]<sup>+</sup> Calcd for C<sub>11</sub>H<sub>15</sub>O 163.1117; Found 163.1116.

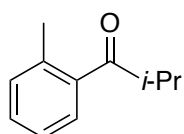

**2-Methyl-1-(*o*-tolyl)propan-1-one (3dj):**<sup>15</sup> 231 mg, 71% yield (18 h) (Scheme 3). Colorless oil. <sup>1</sup>H NMR (400 MHz, CDCl<sub>3</sub>) δ 7.50 (d, *J* = 7.2 Hz, 1H), 7.34 (t, *J* = 7.2 Hz, 1H), 7.28-7.21 (m, 2H), 3.34 (septet, *J* = 6.8 Hz, 1H), 2.42 (s, 3H), 1.16 (d, *J* = 6.8 Hz, 6H). <sup>13</sup>C NMR (100 MHz, CDCl<sub>3</sub>) δ 209.3, 138.6, 137.5, 131.6, 130.6, 127.4, 125.5, 38.8, 20.8, 18.5 (2C). IR (film) 3970, 1689, 1457, 1381, 1340, 1287, 1223 cm<sup>-1</sup>. HRMS (ESI+) *m/z*: [M+H]<sup>+</sup> Calcd for C<sub>11</sub>H<sub>15</sub>O 163.1117; Found 163.1118.

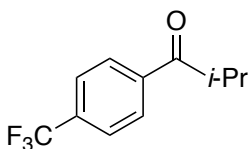

**2-Methyl-1-(4-(trifluoromethyl)phenyl)propan-1-one (3ej):**<sup>15</sup> 301 mg, 70% yield (3 h) (Scheme 3). Colorless oil. <sup>1</sup>H NMR (400 MHz, CDCl<sub>3</sub>) δ 8.05 (d, *J* = 8.4 Hz, 2H), 7.73 (d, *J* = 8.4 Hz, 2H), 3.55 (septet, *J* = 6.8 Hz, 1H), 1.23 (d, *J* = 6.8 Hz, 6H). <sup>13</sup>C NMR (100 MHz, CDCl<sub>3</sub>) δ 203.5, 139.0, 134.2 (d, *J*<sub>C-F</sub> = 32.6 Hz), 128.7 (2C), 125.7 (d, *J*<sub>C-F</sub> = 3.8 Hz, 2C), 123.6 (d, *J*<sub>C-F</sub> = 271 Hz), 35.8, 18.9 (2C). <sup>19</sup>F NMR (376 MHz, CDCl<sub>3</sub>) δ -63.6. IR (film) 2970, 1691, 1468, 1324, 1219, 1171, 1133, 1067 cm<sup>-1</sup>. HRMS (ESI+) *m/z*: [M+H]<sup>+</sup> Calcd for C<sub>11</sub>H<sub>12</sub>F<sub>3</sub>O 217.0835; Found 217.0835.

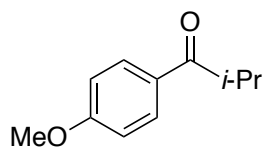

**1-(4-Methoxyphenyl)-2-methylpropan-1-one (3fj):**<sup>15</sup> 283 mg, 79% yield (9 h) (Scheme 3). Colorless oil. <sup>1</sup>H NMR (400 MHz, CDCl<sub>3</sub>) δ 7.95 (d, *J* = 9.2 Hz, 2H), 6.94 (d, *J* = 9.2 Hz, 2H), 3.86 (s, 3H), 3.52 (septet, *J* = 7.2 Hz, 1H), 1.20 (d, *J* = 7.2 Hz, 6H). <sup>13</sup>C NMR (100 MHz, CDCl<sub>3</sub>) δ 203.1, 163.3, 130.6 (2C), 129.1, 113.7 (2C), 55.5, 34.9, 19.3 (2C). IR (film) 2970, 1674, 1600, 1510, 1464, 1260, 1229, 1180, 1159, 1031 cm<sup>-1</sup>. HRMS (ESI+) *m/z*: [M+H]<sup>+</sup> Calcd for C<sub>11</sub>H<sub>15</sub>O<sub>2</sub> 179.1067; Found 179.1066.

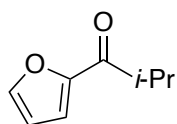

**1-(Furan-2-yl)-2-methylpropan-1-one (3kj):**<sup>16</sup> 274 mg, >99% yield (3 h) (Scheme 3). Colorless oil. <sup>1</sup>H NMR (400 MHz, CDCl<sub>3</sub>) δ 7.59 (d, *J* = 1.2 Hz, 1H), 7.20 (d, *J* = 4.0 Hz, 1H), 6.54 (dd, *J* = 4.0, 1.2 Hz, 1H), 3.34 (septet, *J* = 6.8 Hz, 1H), 1.23 (d, *J* = 6.8 Hz, 6H). <sup>13</sup>C NMR (100 MHz, CDCl<sub>3</sub>) δ 193.7, 152.1, 146.2, 117.1, 112.1, 36.2, 18.8 (2C). IR (film) 2973, 1672, 1566, 1468, 1395, 1253, 1155, 1090 cm<sup>-1</sup>. HRMS (ESI+) *m/z*: [M+Na]<sup>+</sup> Calcd for C<sub>8</sub>H<sub>10</sub>NaO<sub>2</sub> 161.0573; Found 161.0573.

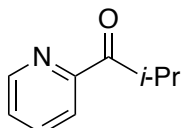

**2-Methyl-1-(pyridin-2-yl)propan-1-one (3lj):**<sup>17</sup> 299 mg, >99% yield (3 h) (Scheme 3). Colorless oil. <sup>1</sup>H NMR (400 MHz, CDCl<sub>3</sub>) δ 8.69 (m, 1H), 8.05 (dd, *J* = 8.0, 1.2 Hz, 1H), 7.84 (td, *J* = 7.6, 1.6 Hz, 1H), 7.46 (m, 1H), 4.12 (septet, *J* = 7.2 Hz, 1H), 1.21 (d, *J* = 7.2 Hz, 6H). <sup>13</sup>C NMR (100 MHz, CDCl<sub>3</sub>) δ 205.8, 152.9, 148.9, 136.9, 126.9, 122.5, 34.2, 18.7 (2C). IR (film) 2971, 1697, 1582, 1465, 1346, 1224, 1092 cm<sup>-1</sup>. HRMS (ESI+) *m/z*: [M+Na]<sup>+</sup> Calcd for C<sub>9</sub>H<sub>11</sub>NNaO 172.0733; Found 172.0733.

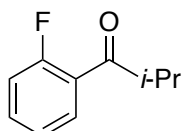

**1-(2-Fluorophenyl)-2-methylpropan-1-one (3mj):**<sup>15</sup> 333 mg, >99% yield (3 h) (Scheme 3). Colorless oil. <sup>1</sup>H NMR (400 MHz, CDCl<sub>3</sub>) δ 7.77 (td, *J* = 7.2, 2.0 Hz, 1H), 7.50 (m, 1H), 7.22 (t, *J* = 7.2 Hz, 1H), 7.12 (dd, *J* = 10.8, 8.4 Hz, 1H), 3.41 (septet, *J* = 6.8 Hz, 1H), 1.21 (d, *J* = 6.8 Hz, 6H). <sup>13</sup>C NMR (100 MHz, CDCl<sub>3</sub>) δ 203.6 (d, *J*<sub>C-F</sub> = 3.8 Hz), 161.2 (d, *J*<sub>C-F</sub> = 252 Hz), 134.0 (d,

$J_{C-F} = 8.6$  Hz), 130.9 (d,  $J_{C-F} = 2.9$  Hz), 125.8 (d,  $J_{C-F} = 14.3$  Hz), 124.5 (d,  $J_{C-F} = 2.9$  Hz), 116.5 (d,  $J_{C-F} = 24.0$  Hz), 40.2 (d,  $J_{C-F} = 6.8$  Hz), 18.5 (2C).  $^{19}\text{F}$  NMR (376 MHz,  $\text{CDCl}_3$ )  $\delta$  -111.8. IR (film) 2975, 1686, 1609, 1466, 1451, 1384, 1349, 1269, 1212, 1152, 1102  $\text{cm}^{-1}$ . HRMS (ESI+)  $m/z$ :  $[\text{M}+\text{Na}]^+$  Calcd for  $\text{C}_{10}\text{H}_{11}\text{FNaO}$  189.0686; Found 189.0686.

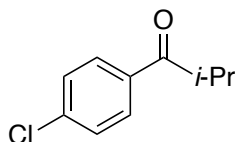

**1-(4-Chlorophenyl)-2-methylpropan-1-one (3jj):**<sup>15</sup> 353 mg, 97% yield (3 h) (Scheme 3). Colorless oil.  $^1\text{H}$  NMR (400 MHz,  $\text{CDCl}_3$ )  $\delta$  7.90 (d,  $J = 8.0$  Hz, 2H), 7.44 (d,  $J = 8.0$  Hz, 2H), 3.50 (septet,  $J = 7.2$  Hz, 1H), 1.22 (d,  $J = 7.2$  Hz, 6H).  $^{13}\text{C}$  NMR (100 MHz,  $\text{CDCl}_3$ )  $\delta$  203.3, 139.2, 134.4, 129.8 (2C), 128.9 (2C), 35.4, 19.1 (2C). IR (film) 2972, 1685, 1590, 1468, 1401, 1280, 1221, 1160, 1092  $\text{cm}^{-1}$ . HRMS (ESI+)  $m/z$ :  $[\text{M}+\text{H}]^+$  Calcd for  $\text{C}_{10}\text{H}_{12}\text{ClO}$  183.0571; Found 183.0571.

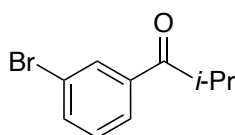

**1-(3-Bromophenyl)-2-methylpropan-1-one (3nj):**<sup>18</sup> 19.6 mg, 4% yield (3 h) (Scheme 3). Colorless oil.  $^1\text{H}$  NMR (400 MHz,  $\text{CDCl}_3$ )  $\delta$  8.07 (s, 1H), 7.86 (d,  $J = 7.6$  Hz, 1H), 7.67 (d,  $J = 7.6$  Hz, 1H), 7.34 (d,  $J = 7.6$  Hz, 1H), 3.49 (septet,  $J = 6.8$  Hz, 1H), 1.23 (d,  $J = 6.8$  Hz, 6H).  $^{13}\text{C}$  NMR (100 MHz,  $\text{CDCl}_3$ )  $\delta$  203.1, 138.0, 135.6, 131.4, 130.2, 126.8, 123.0, 35.6, 19.0 (2C). IR (film) 2971, 1683, 1565, 1465, 1418, 1382, 1212, 1159, 1068  $\text{cm}^{-1}$ . HRMS (ESI+)  $m/z$ :  $[\text{M}+\text{Na}]^+$  Calcd for  $\text{C}_{10}\text{H}_{11}^{79}\text{BrNaO}$  248.9886; Found 248.9887. Calcd for  $\text{C}_{10}\text{H}_{11}^{81}\text{BrNaO}$  250.9865; Found 250.9866

**7. General procedure for the amine synthesis via ZnCl<sub>2</sub>-catalyzed Grignard addition reaction of aromatic nitriles **1** (Scheme 4).**

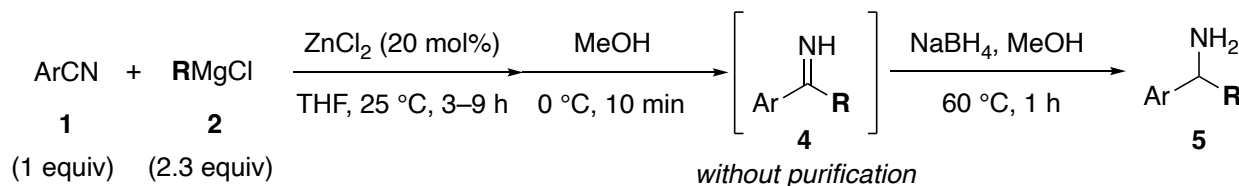

To a two-necked round flask, zinc chloride (54.5 mg, 0.40 mmol) was added and melt-dried (>300 °C) by a heat gun under reduced pressure (<5 Torr) for 5 min. Grignard reagent RMgCl **2** (1.0–3.0 M in THF or Et<sub>2</sub>O, 4.6 mmol) and THF were added, and the solution was stirred at 25 °C for 30 min (If a Grignard reagent is >1.0 M, the solution of the Grignard reagent is diluted with THF to 1.0 M.). Nitrile **1** (2.0 mmol) was added, and the mixture was stirred at 25 °C for 3–9 h. The reaction was monitored by TLC. The mixture was then cooled to 0 °C, and methanol (3 mL) was added. The mixture was vigorously stirred at 0 °C for 10 min, and then water (20 mL) and diethyl ether (20 mL) were added. The mixture was extracted with diethyl ether (20 mL × 2). The combined organic phase was washed with brine (20 mL) and dried over MgSO<sub>4</sub>. The solution was concentrated under reduced pressure, and the resultant residue was used without purification for the next step. To a solution of the residue in methanol (10 mL) was added sodium borohydride (341 mg, 9.0 mmol) at 25 °C. After stirring at 25 °C for 5 min, the mixture was stirred at 60 °C for 1 h. Then the mixture was cooled to 25 °C, water (20 mL) and diethyl ether (20 mL) were added. The mixture was extracted with diethyl ether (20 mL × 3). The combined organic phase was washed with brine (50 mL), dried over MgSO<sub>4</sub>, and concentrated under reduced pressure. The resultant residue was purified by silica gel column chromatography (eluent: *n*-hexane:EtOAc = 5:1 to 1:1) to give the desired product **5**.

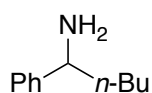

**1-Phenylpentan-1-amine (5aa):**<sup>19</sup> 290 mg, 89% yield (6 h) (Scheme 4). Colorless oil. <sup>1</sup>H NMR (400 MHz, CDCl<sub>3</sub>) δ 7.37-7.20 (m, 5H), 3.85 (t, *J* = 7.2 Hz, 1H), 1.72-1.60 (m, 2H), 1.52 (br, 2H), 1.39-1.24 (m, 3H), 1.18 (m, 1H), 0.86 (t, *J* = 7.2 Hz, 3H). <sup>13</sup>C NMR (100 MHz, CDCl<sub>3</sub>) δ 146.8, 128.4 (2C), 126.8, 126.3 (2C), 56.3, 39.4, 28.7, 22.6, 14.0. IR (film) 3290, 2929, 1601, 1492, 1451, 1378, 1070, 1027 cm<sup>-1</sup>. HRMS (ESI+) *m/z*: [M+H]<sup>+</sup> Calcd for C<sub>11</sub>H<sub>18</sub>N 164.1434; Found 164.1435.

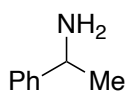

**1-Phenylethylamine (5ab):**<sup>20</sup> 182 mg, 75% yield (3 h) (Scheme 4). Colorless oil. <sup>1</sup>H NMR (400 MHz, CDCl<sub>3</sub>) δ 7.39-7.28 (m, 4H), 7.22 (m, 1H), 4.10 (q, *J* = 6.4 Hz, 1H), 1.46 (br, 2H), 1.37 (d, *J*



= 6.4 Hz, 3H).  $^{13}\text{C}$  NMR (100 MHz,  $\text{CDCl}_3$ )  $\delta$  147.8, 128.4 (2C), 126.7, 125.6 (2C), 51.3, 25.7. IR (film) 3290, 2963, 1603, 1492, 1451, 1369, 1105, 1024  $\text{cm}^{-1}$ . HRMS (ESI+)  $m/z$ :  $[\text{M}+\text{H}]^+$  Calcd for  $\text{C}_8\text{H}_{12}\text{N}$  122.0964; Found 122.0968.

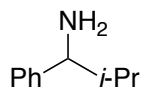

**2-Methyl-1-phenylpropan-1-amine (5aj):**<sup>21</sup> 247 mg, 83% yield (6 h) (Scheme 4). Colorless oil.  $^1\text{H}$  NMR (400 MHz,  $\text{CDCl}_3$ )  $\delta$  7.36-7.20 (m, 5H), 3.59 (d,  $J = 7.2$  Hz, 1H), 1.85 (septet,  $J = 7.2$  Hz, 1H), 1.50 (br, 2H), 0.97 (t,  $J = 7.2$  Hz, 3H), 0.77 (t,  $J = 7.2$  Hz, 3H).  $^{13}\text{C}$  NMR (100 MHz,  $\text{CDCl}_3$ )  $\delta$  145.5, 128.1 (2C), 127.0 (2C), 126.7, 62.5, 35.4, 19.8, 18.9. IR (film) 3305, 2957, 1602, 1491, 1453, 1383, 1364, 1161, 1027  $\text{cm}^{-1}$ . HRMS (ESI+)  $m/z$ :  $[\text{M}+\text{H}]^+$  Calcd for  $\text{C}_{10}\text{H}_{16}\text{N}$  150.1277; Found 150.1279.

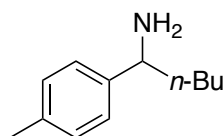

**1-(*p*-Tolyl)pentan-1-amine (5ba):** 328 mg, 93% yield (9 h) (Scheme 4). Colorless oil.  $^1\text{H}$  NMR (400 MHz,  $\text{CDCl}_3$ )  $\delta$  7.19 (d,  $J = 7.6$  Hz, 2H), 7.13 (d,  $J = 7.6$  Hz, 2H), 3.50 (t,  $J = 6.8$  Hz, 1H), 2.33 (s, 3H), 1.72-1.58 (m, 2H), 1.50 (br, 2H), 1.36-1.25 (m, 3H), 1.18 (m, 1H), 0.86 (t,  $J = 6.8$  Hz, 3H).  $^{13}\text{C}$  NMR (100 MHz,  $\text{CDCl}_3$ )  $\delta$  143.9, 136.3, 129.1 (2C), 126.2 (2C), 56.0, 39.4, 28.8, 22.7, 21.0, 14.0. IR (film) 3367, 2927, 1576, 1513, 1457, 1376, 1111, 1043  $\text{cm}^{-1}$ . HRMS (ESI+)  $m/z$ :  $[\text{M}+\text{Na}]^+$  Calcd for  $\text{C}_{12}\text{H}_{19}\text{NNa}$  200.1410; Found 200.1411.

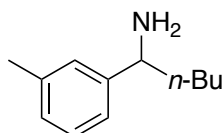

**1-(*m*-Tolyl)pentan-1-amine (5ca):** 332 mg, 94% yield (6 h) (Scheme 4). Colorless oil.  $^1\text{H}$  NMR (400 MHz,  $\text{CDCl}_3$ )  $\delta$  7.20 (d,  $J = 8.0$  Hz, 1H), 7.12 (s, 1H), 7.08 (d,  $J = 7.6$  Hz, 1H), 7.04 (d,  $J = 8.0$  Hz, 1H), 3.82 (t,  $J = 7.2$  Hz, 1H), 2.34 (s, 3H), 1.70-1.60 (m, 2H), 1.53 (br, 2H), 1.39-1.25 (m, 3H), 1.18 (m, 1H), 0.88 (t,  $J = 6.8$  Hz, 3H).  $^{13}\text{C}$  NMR (100 MHz,  $\text{CDCl}_3$ )  $\delta$  146.8, 138.0, 128.3, 127.5, 127.0, 123.3, 56.2, 39.3, 28.8, 22.7, 21.5, 14.0. IR (film) 3291, 2928, 1607, 1464, 1377, 1152, 1085, 1042  $\text{cm}^{-1}$ . HRMS (ESI+)  $m/z$ :  $[\text{M}+\text{Na}]^+$  Calcd for  $\text{C}_{12}\text{H}_{19}\text{NNa}$  200.1410; Found 200.1410.

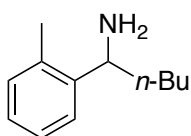

**1-(*o*-Tolyl)pentan-1-amine (5da):**<sup>22</sup> 296 mg, 83% yield (6 h) (Scheme 4). Colorless oil.  $^1\text{H}$  NMR

(400 MHz, CDCl<sub>3</sub>)  $\delta$  7.40 (d,  $J$  = 7.2 Hz, 1H), 7.21 (m, 1H), 7.14-7.11 (m, 2H), 4.15 (t,  $J$  = 6.8 Hz, 1H), 2.34 (s, 3H), 1.72-1.55 (m, 2H), 1.49 (br, 2H), 1.46-1.19 (m, 4H), 0.88 (t,  $J$  = 7.2 Hz, 3H). <sup>13</sup>C NMR (100 MHz, CDCl<sub>3</sub>)  $\delta$  145.0, 134.8, 130.3, 126.4 (2C), 124.9, 51.2, 38.7, 28.9, 22.8, 19.3, 14.1. IR (film) 3293, 2929, 1587, 1461, 1377, 1295, 1177, 1048 cm<sup>-1</sup>. HRMS (ESI+)  $m/z$ : [M+Na]<sup>+</sup> Calcd for C<sub>12</sub>H<sub>19</sub>NNa 200.1410; Found 200.1410.

### 8. Gram-scale ketone **3jj** synthesis by the ZnCl<sub>2</sub>-catalyzed Grignard addition reaction of aromatic nitrile **1j** (Scheme 5a).

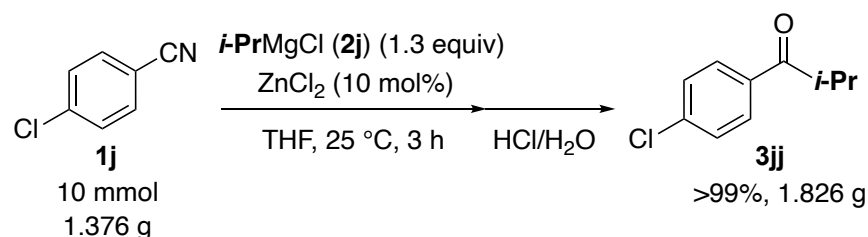

To a two-necked round flask, zinc chloride (136 mg, 1.0 mmol) was added and melt-dried (>300 °C) by a heat gun under reduced pressure (<5 Torr) for 5 min. Grignard reagent *i*-PrMgCl **2j** (2.0 M in THF, 6.5 mL, 13 mmol) was added, and the solution was stirred at 25 °C for 30 min. Nitrile **1j** (1.376 g, 10.0 mmol) in THF (6.5 mL) was added, and the mixture was stirred at 25 °C for 3 h. The reaction was monitored by TLC. The mixture was then cooled to 0 °C, and diethyl ether (50 mL) and 1 M HCl aqueous solution (100 mL) were added. The mixture was stirred at 25 °C for 1 h, and then extracted with diethyl ether (30 mL  $\times$  3). The combined organic phase was washed with brine (100 mL) and dried over MgSO<sub>4</sub>. The solution was concentrated under reduced pressure, and the resultant residue was purified by silica gel column chromatography (eluent: *n*-hexane:EtOAc = 20:1 to 2:1) to give the desired product **3jj** (1.826 g, >99% yield).

**9. Scalable ZnCl<sub>2</sub>-catalyzed Grignard addition reaction of aromatic nitrile **1a** and sequential alkyl addition to the resulting ketone (Scheme 5b).**

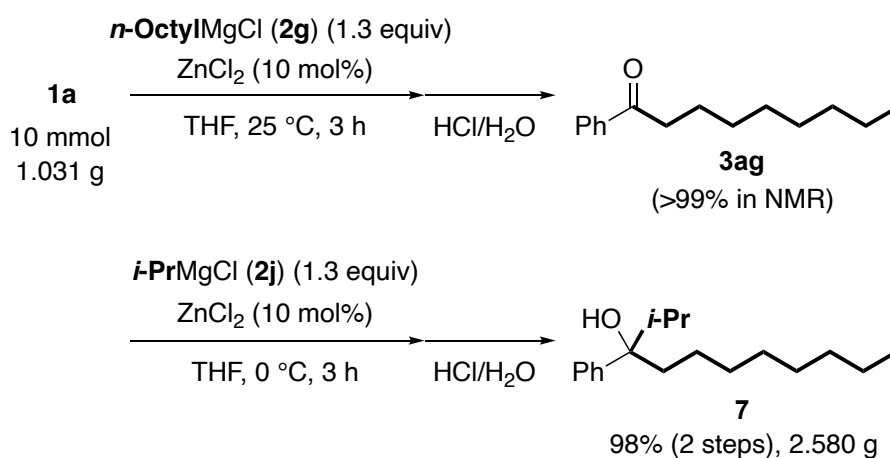

To a two-necked round flask, zinc chloride (136 mg, 1.0 mmol) was added and melt-dried (>300 °C) by a heat gun under reduced pressure (<5 Torr) for 5 min. *n*-Octylmagnesium chloride **2g** (2.0 M in THF, 6.5 mL, 13 mmol) and THF (6.5 mL) were added, and the solution was stirred at 25 °C for 30 min. Nitrile **1a** (1.02 mL, 10.0 mmol) was added, and the mixture was stirred at 25 °C for 3 h. The reaction was monitored by TLC. The mixture was then cooled to 0 °C, and diethyl ether (50 mL) and 1 M HCl aqueous solution (100 mL) were added. The mixture was stirred at 25 °C for 1 h, and then extracted with diethyl ether (50 mL × 3). The combined organic phase was washed with brine (100 mL) and dried over MgSO<sub>4</sub>. The solution was concentrated under reduced pressure to give the desired product **3ag** (ca. 2.18 g, >99% yield by <sup>1</sup>H NMR analysis). Without purification of **3ag** obtained, the following alkyl addition was conducted. To a two-necked round flask, zinc chloride (136 mg, 1 mmol) was added and melt-dried (>300 °C) by a heat gun under reduced pressure (<5 Torr) for 5 min. Isopropylmagnesium chloride **2j** (2.0 M in THF, 13 mmol, 6.5 mL) was added, and the solution was stirred at 25 °C for 30 min. The solution was cooled to 0 °C, and ketone **3ag** in THF (6.5 mL), which was obtained in the previous reaction, was added. The mixture was stirred at 0 °C for 3 h, and the reaction was monitored by TLC. To the mixture at 0 °C, diethyl ether (50 mL) and 1 M HCl aqueous solution (100 mL) were added. The mixture was stirred at 25 °C for 30 min, and then extracted with diethyl ether (50 mL × 3). The combined organic phase was washed with brine (100 mL), dried over MgSO<sub>4</sub>, and concentrated under reduced pressure. The resultant residue was purified by silica gel column chromatography (eluent: *n*-hexane:EtOAc = 10:1 to 2:1) to give the desired product **7** (2.580 g, 98% yield in two steps).

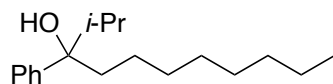

**2-Methyl-3-phenylundecan-3-ol (7):**<sup>19</sup> 2.580 g, 98% yield (Scheme 5b). Colorless oil. <sup>1</sup>H NMR (400 MHz, CDCl<sub>3</sub>) δ 7.38-7.27 (m, 4H), 7.21 (t, *J* = 6.8 Hz, 1H), 2.02 (septet, *J* = 6.8 Hz, 1H), 1.90-1.76 (m, 2H), 1.32-1.13 (m, 12H), 0.94 (d, *J* = 6.8 Hz, 3H), 0.91 (br, 1H), 0.85 (d, *J* = 7.2 Hz, 3H), 0.71 (d, *J* = 6.8 Hz, 3H). <sup>13</sup>C NMR (100 MHz, CDCl<sub>3</sub>) δ 145.6, 127.8 (2C), 126.1, 125.8 (2C), 79.1, 39.6, 37.9, 31.9, 30.2, 29.5, 29.3, 23.6, 22.7, 17.5, 16.7, 14.1. IR (film) 1032, 1172, 1383, 1446, 1466, 2854, 2926, 3495 cm<sup>-1</sup>. HRMS (ESI+) *m/z*: [M+Na]<sup>+</sup> Calcd for C<sub>18</sub>H<sub>30</sub>NaO 285.2189; Found 285.2185.

## 10. Computational details.

DFT calculations were performed using the *Gaussian16*<sup>23</sup> program package. Geometry optimizations and vibrational-frequency analyses were performed via restricted Kohn–Sham DFT calculations using the M06 functional.<sup>24,25</sup> In the numerical integration, a larger grid (*ultrafinegrid*) was used.<sup>23</sup> Pople’s 6-31G(d,p) basis set was used for the Gaussian basis functions for all atoms<sup>26</sup>. The polarizable continuum model (PCM)<sup>27</sup> was used to determine the solvent effect of tetrahydrofuran (THF). The total electronic energy values, thermal free terms, and Gibbs free energy values in THF at 298.15 K are listed in Table S1 together with the corresponding structure names as shown in the manuscript. Also, all cartesian coordinates of the stationary points are listed in Table S2.

The Grignard reaction discovered by Victor Grignard in 1900 is a prominent process to form carbon–carbon bonds benefiting from the polarity of the C(δ<sup>-</sup>)–Mg(δ<sup>+</sup>) bond. However, the mechanism of this reaction is difficult to elucidate because solutions of Grignard reagents contain a variety of chemical molecules according to the Schlenk equilibrium.

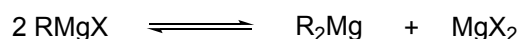

Furthermore, the nominal reactant ‘RMgX’ is a condensed representation of numerous mono-, di-, and polymetallic species that coexist in the Schlenk equilibrium. The relative abundance of the molecules depends on the nature of the organic residue R and the halogen X as well as on the experimental conditions. Pioneering work based on computational approaches by Yamazaki and Yamabe<sup>28</sup> and Mori and Kato<sup>29</sup> suggest that dinuclear Grignard moieties are more reactive in nucleophilic additions than mononuclear species for the Grignard reactions with acetaldehyde and CH<sub>3</sub>MgCl. Cascella et al.<sup>30,31</sup> have performed molecular-dynamics simulations using explicit solvent models, finding that the Mg(II) centers of the mono- and dinuclear species can accommodate a variable number of solvent molecules in their first coordination spheres. Moreover, the same authors examined possible pathways based on the Schlenk equilibrium for the mono- and dinuclear species in Grignard reactions in THF and concluded that the conformational space including the explicit treatment of the solvent should be considered.<sup>31</sup>

Fig. S1 shows the organometallic mono- and dinuclear species and the possible pathways for the Zn(II)-catalyzed Grignard reaction between benzonitrile (**1a**) and CH<sub>3</sub>MgCl (**2b**). In the Schlenk equilibrium, there are three conceivable mononuclear species with the Zn(II) catalyst, i.e., **MeMgClZn**, **Me<sub>2</sub>MgZn**, and **MgCl<sub>2</sub>Zn**, and two mononuclear species without the Zn(II) catalyst, i.e., **MeMgCl** and **Me<sub>2</sub>Mg**. In these calculations, the reactants, transition states, and product species are defined as **RC**, **TS**, and **PR**, respectively. Figs. S2–S4 show the Gibbs free energy diagrams for the mononuclear species with and without Zn(II) catalyst. Fig. S2 shows the Gibbs free energy difference at 298.15 K in kcal/mol from each reactant species, i.e., **RC\_MeMgCl**, **RC\_Me<sub>2</sub>Mg**, and **PhCN...MgCl<sub>2</sub>**, without coordinated THF. Without the Zn(II) catalyst, the free activation energy of the transition state with two methyl groups coordinated to the Mg(II) atom (**TS\_Me<sub>2</sub>Mg**) is lower than that of the transition state with the standard Grignard reactant (**TS\_MeMgCl**). The binding between Mg(II) and the carbon atoms of **Me<sub>2</sub>Mg** is weaker than that of **MeMgCl**, i.e., the bond length and bond order between Mg(II) and the carbon atoms of **Me<sub>2</sub>Mg** (2.11 Å; 0.360) are longer and smaller than those of **MeMgCl** (2.09 Å; 0.393), respectively. The energy diagrams of the Zn(II) catalysts are also shown in Fig. S2. All chloride ions in ZnCl<sub>2</sub> were assumed to be replaced with methyl groups via reaction with CH<sub>3</sub>MgCl. The free energy difference of **MeMgClZn**, **Me<sub>2</sub>MgZn**, and **MgCl<sub>2</sub>Zn** indicates the difference from the total free energy values of each reactant, i.e., **RC\_MeMgCl**, **RC\_Me<sub>2</sub>Mg**, and **PhCN...MgCl<sub>2</sub>**, and **ZnMe<sub>2</sub>**, respectively. In the case of Zn(II) catalysis, the methyl group of **ZnMe<sub>2</sub>** nucleophilically attacks the nitrile carbon. Especially, in the **MeMgClZn** species, there are two possible reaction mechanisms via transition states **TSa\_MeMgClZn** or **TSb\_MeMgClZn**, in which the Zn(II) atom of **ZnMe<sub>2</sub>** coordinates to the methyl group or the Cl atom, respectively. The Gibbs free energy of **TSa\_MeMgClZn** with the zinc(II)ate complex is smaller than that of **TSb\_MeMgClZn**. In the absence of a catalyst, the transition state with two methyl groups coordinated to the Mg(II) atom (**TS\_Me<sub>2</sub>MgZn**) exhibits the lowest energy among the transition states. Fig. S3 shows the Gibbs free energy difference in kcal/mol for each reactant species, i.e., **RCb\_MeMgCl<sub>THF1</sub>**, **RCb\_Me<sub>2</sub>Mg<sub>THF1</sub>**, and **PhCN...MgCl<sub>2</sub>...THF1**, with one coordinated THF molecule. Compared to the energy diagrams without THF coordination, the activation barriers for the nucleophilic addition tend to decrease. The free activation energies of **TSa\_Me<sub>2</sub>Mg<sub>THF1</sub>** and **TSb\_Me<sub>2</sub>Mg<sub>THF1</sub>** are lower than those of the structures with the standard Grignard reactants, i.e., **TSa\_MeMgCl<sub>THF1</sub>** and **TSb\_MeMgCl<sub>THF1</sub>**. The Gibbs free energies of the transition state in the Zn(II) catalysis system, i.e., **TSa\_Me<sub>2</sub>MgZn<sub>THF1</sub>** and **TSb\_MeMgClZn<sub>THF1</sub>**, are lower than those without Zn(II) catalyst, **TSa\_Me<sub>2</sub>Mg<sub>THF1</sub>** and **TSb\_MeMgCl<sub>THF1</sub>**, respectively. Fig. S4 shows the Gibbs free energy difference in kcal/mol for each reactant species, **RCa\_MeMgCl<sub>THF2</sub>**, **RCa\_Me<sub>2</sub>Mg<sub>THF2</sub>**, and **PhCN...MgCl<sub>2</sub>...THF2a**, with two coordinated THF molecules. The activation barriers for the nucleophilic addition tend to decrease with increasing number of THF molecules coordinated to the Mg atoms. In the mononuclear species, the transition states with two coordinated THF molecules, i.e., **TSc\_Me<sub>2</sub>MgZn<sub>THF2</sub>** and **TSa\_Me<sub>2</sub>Mg<sub>THF2</sub>**, exhibit lower activation energies than

other species with and without Zn(II) catalysts, respectively.

Figs. S5–S6 show the Gibbs free energy diagrams for the dinuclear species with and without Zn(II) catalyst. To yield dimeric structures, the halide groups in **MeMgCl** or **MgCl<sub>2</sub>** are required to form bridges between the Mg(II) atoms. The possible dinuclear species are **MeMg(μ-Cl)<sub>2</sub>MeMg** and **MeMg(μ-Cl)(μ-Me)MgCl** in the Schlenk equilibrium. The Mg(II) atom in the dinuclear species is coordinated to the nitrogen atom in benzonitrile. This pathway is called germinal (**gm**) when the two methyl groups are on the same Mg(II) atom and vicinal (**vi**) when they are on two different Mg(II) atoms. As mentioned in a previous study,<sup>31</sup> the bridging methyl groups in **MeMg(μ-Cl)(μ-Me)MgCl** are unlikely to act as a nucleophile owing to the high activation energy. Fig. S5 shows the Gibbs free energy difference in kcal/mol from the reactant species, i.e., **RC<sub>vi</sub>MeMg(μ-Cl)<sub>2</sub>MeMg**, in the absence of coordinated THF molecules. Fig. S6 shows the Gibbs free energy difference in kcal/mol from the reactant species **RC<sub>vi</sub>MeMg(μ-Cl)<sub>2</sub>MeMg<sub>THF3</sub>** with three coordinated THF molecules corresponding to the mononuclear species with two coordinated THF molecules. The dinuclear species tend to be more reactive in nucleophilic additions than mononuclear species.

**Table S1.** Total Electronic Energy and Gibbs Free Energy (Hartree) in THF at 298.15 K

|                                            | Description in<br>the main text | <i>E</i>     | Thermal free term<br>(298.15 K) | <i>G</i>     |
|--------------------------------------------|---------------------------------|--------------|---------------------------------|--------------|
| <b>ZnMe<sub>2</sub></b>                    |                                 | -1858.804559 | 0.039779                        | -1858.76478  |
| <b>MeMgCl</b>                              |                                 | -700.206734  | 0.007852                        | -700.198882  |
| <b>Me<sub>2</sub>Mg</b>                    |                                 | -279.814964  | 0.038034                        | -279.776930  |
| <b>MgCl<sub>2</sub></b>                    |                                 | -1120.591413 | -0.023043                       | -1120.614456 |
| <b>MeMgCl...THF</b>                        |                                 | -932.533321  | 0.115402                        | -932.417919  |
| <b>Me<sub>2</sub>Mg...THF</b>              |                                 | -512.136958  | 0.146748                        | -511.990210  |
| <b>MgCl<sub>2</sub>...THF</b>              |                                 | -1352.922664 | 0.080243                        | -1352.842420 |
| <b>PhCN...MgCl<sub>2</sub></b>             |                                 | -1444.874468 | 0.060614                        | -1444.813854 |
| <b>PnCN...MgCl<sub>2</sub>...THF1</b>      |                                 | -1677.206329 | 0.169000                        | -1677.037328 |
| <b>PnCN...MgCl<sub>2</sub>...THF2a</b>     |                                 | -1909.530737 | 0.281136                        | -1909.249601 |
| <b>PnCN...MgCl<sub>2</sub>...THF2b</b>     |                                 | -1909.531099 | 0.283351                        | -1909.247748 |
| <b>RC_MeMgCl</b>                           |                                 | -1024.485217 | 0.092336                        | -1024.392881 |
| <b>TS_MeMgCl</b>                           | <b>TS(I-V)<sub>0</sub></b>      | -1024.444519 | 0.098265                        | -1024.346254 |
| <b>PR_MeMgCl</b>                           |                                 | -1024.504171 | 0.099553                        | -1024.404618 |
| <b>RCa_MeMgCl<sub>THF1</sub></b>           |                                 | -1256.813023 | 0.203990                        | -1256.609033 |
| <b>TSa_MeMgCl<sub>THF1</sub></b>           |                                 | -1256.777301 | 0.208716                        | -1256.568584 |
| <b>PRa_MeMgCl<sub>THF1</sub></b>           |                                 | -1256.834120 | 0.208362                        | -1256.625758 |
| <b>RCb_MeMgCl<sub>THF1</sub></b>           |                                 | -1256.812378 | 0.201570                        | -1256.610808 |
| <b>TSb_MeMgCl<sub>THF1</sub></b>           |                                 | -1256.776468 | 0.208128                        | -1256.568340 |
| <b>PRb_MeMgCl<sub>THF1</sub></b>           |                                 | -1256.831617 | 0.210046                        | -1256.621571 |
| <b>RCa_MeMgCl<sub>THF2</sub></b>           | <b>I</b>                        | -1489.131563 | 0.313206                        | -1488.818358 |
| <b>TSa_MeMgCl<sub>THF2</sub></b>           | <b>TS(I-V)</b>                  | -1489.099917 | 0.316260                        | -1488.783658 |
| <b>PRa_MeMgCl<sub>THF2</sub></b>           | <b>V</b>                        | -1489.165507 | 0.320315                        | -1488.845191 |
| <b>RCb_MeMgCl<sub>THF2</sub></b>           |                                 | -1489.131512 | 0.314797                        | -1488.816716 |
| <b>TSb_MeMgCl<sub>THF2</sub></b>           |                                 | -1489.092019 | 0.316786                        | -1488.775233 |
| <b>PRb_MeMgCl<sub>THF2</sub></b>           |                                 | -1489.166855 | 0.319494                        | -1488.847361 |
| <b>RC_Me<sub>2</sub>Mg</b>                 |                                 | -604.088749  | 0.124951                        | -603.963798  |
| <b>TS_Me<sub>2</sub>Mg</b>                 |                                 | -604.055526  | 0.129773                        | -603.925752  |
| <b>PR_Me<sub>2</sub>Mg</b>                 |                                 | -604.115591  | 0.132978                        | -603.982613  |
| <b>RCa_Me<sub>2</sub>Mg<sub>THF1</sub></b> |                                 | -836.412588  | 0.235415                        | -836.177173  |
| <b>TSa_Me<sub>2</sub>Mg<sub>THF1</sub></b> |                                 | -836.384225  | 0.239001                        | -836.145223  |

|                                           |              |          |              |
|-------------------------------------------|--------------|----------|--------------|
| PRa_Me <sub>2</sub> Mg <sub>THF</sub> 1   | -836.440981  | 0.236564 | -836.204417  |
| RCb_Me <sub>2</sub> Mg <sub>THF</sub> 1   | -836.410894  | 0.233317 | -836.177577  |
| TSb_Me <sub>2</sub> Mg <sub>THF</sub> 1   | -836.382486  | 0.237542 | -836.144944  |
| PRb_Me <sub>2</sub> Mg <sub>THF</sub> 1   | -836.440871  | 0.240097 | -836.200774  |
| RCa_Me <sub>2</sub> Mg <sub>THF</sub> 2   | -1068.725429 | 0.343686 | -1068.381743 |
| TSa_Me <sub>2</sub> Mg <sub>THF</sub> 2   | -1068.699214 | 0.346571 | -1068.352643 |
| PRa_Me <sub>2</sub> Mg <sub>THF</sub> 2   | -1068.767112 | 0.350594 | -1068.416517 |
| RCb_Me <sub>2</sub> Mg <sub>THF</sub> 2   | -1068.726968 | 0.345702 | -1068.381266 |
| TSb_Me <sub>2</sub> Mg <sub>THF</sub> 2   | -1068.689882 | 0.348400 | -1068.341482 |
| PRb_Me <sub>2</sub> Mg <sub>THF</sub> 2   | -1068.768634 | 0.350799 | -1068.417834 |
| RCa_MeMgClZn                              | -2883.302038 | 0.158197 | -2883.143840 |
| TSa_MeMgClZn                              | -2883.275050 | 0.162375 | -2883.112674 |
| PRa_MeMgClZn                              | -2883.349705 | 0.165711 | -2883.183994 |
| RCb_MeMgClZn                              | -2883.302351 | 0.156949 | -2883.145403 |
| TSb_MeMgClZn                              | -2883.266490 | 0.157272 | -2883.109217 |
| PRb_MeMgClZn                              | -2883.346518 | 0.163572 | -2883.182946 |
| RCa_MeMgClZn <sub>THF</sub> 1             | -3115.637468 | 0.267972 | -3115.369497 |
| TSa_MeMgClZn <sub>THF</sub> 1             | -3115.608238 | 0.272292 | -3115.335946 |
| PRa_MeMgClZn <sub>THF</sub> 1             | -3115.683431 | 0.277212 | -3115.406219 |
| RCb_MeMgClZn <sub>THF</sub> 1             | -3115.636841 | 0.267562 | -3115.369279 |
| TSb_MeMgClZn <sub>THF</sub> 1             | -3115.607420 | 0.272216 | -3115.335204 |
| PRb_MeMgClZn <sub>THF</sub> 1             | -3115.686104 | 0.275363 | -3115.410741 |
| RCa_MeMgClZn <sub>THF</sub> 2             | -3347.958213 | 0.376379 | -3347.581834 |
| TSa_MeMgClZn <sub>THF</sub> 2             | -3347.933148 | 0.382955 | -3347.550194 |
| PRa_MeMgClZn <sub>THF</sub> 2             | -3348.013925 | 0.387673 | -3347.626252 |
| RCb_MeMgClZn <sub>THF</sub> 2             | -3347.956818 | 0.378046 | -3347.578772 |
| TSb_MeMgClZn <sub>THF</sub> 2             | -3347.929266 | 0.380905 | -3347.548361 |
| PRb_MeMgClZn <sub>THF</sub> 2             | -3348.007941 | 0.384777 | -3347.623164 |
| RCc_MeMgClZn <sub>THF</sub> 2             | -3347.958289 | 0.377749 | -3347.580540 |
| TSa_MeMgClZn <sub>THF</sub> 2             | -3347.933818 | 0.383193 | -3347.550625 |
| PRc_MeMgClZn <sub>THF</sub> 2             | -3348.004612 | 0.386811 | -3347.617801 |
| RC_Me <sub>2</sub> MgZn                   | -2462.920981 | 0.189712 | -2462.731269 |
| TS_Me <sub>2</sub> MgZn                   | -2462.885265 | 0.193445 | -2462.691820 |
| PR_Me <sub>2</sub> MgZn                   | -2462.958975 | 0.198407 | -2462.760568 |
| RCa_Me <sub>2</sub> MgZn <sub>THF</sub> 1 | -2695.240001 | 0.298440 | -2694.941560 |
| TSa_Me <sub>2</sub> MgZn <sub>THF</sub> 1 | -2695.216482 | 0.303460 | -2694.913022 |
| PRa_Me <sub>2</sub> MgZn <sub>THF</sub> 1 | -2695.288327 | 0.308353 | -2694.979974 |
| RCb_Me <sub>2</sub> MgZn <sub>THF</sub> 1 | -2695.240297 | 0.298281 | -2694.942016 |
| TSb_Me <sub>2</sub> MgZn <sub>THF</sub> 1 | -2695.213407 | 0.303127 | -2694.910279 |
| PRb_Me <sub>2</sub> MgZn <sub>THF</sub> 1 | -2695.291393 | 0.304469 | -2694.986924 |
| RCa_Me <sub>2</sub> MgZn <sub>THF</sub> 2 | -2927.557273 | 0.410859 | -2927.146414 |
| TSa_Me <sub>2</sub> MgZn <sub>THF</sub> 2 | -2927.534592 | 0.415275 | -2927.119317 |
| PRa_Me <sub>2</sub> MgZn <sub>THF</sub> 2 | -2927.615642 | 0.416423 | -2927.199219 |
| RCb_Me <sub>2</sub> MgZn <sub>THF</sub> 2 | -2927.557291 | 0.407791 | -2927.149500 |
| TSb_Me <sub>2</sub> MgZn <sub>THF</sub> 2 | -2927.530667 | 0.412219 | -2927.118448 |
| PRb_Me <sub>2</sub> MgZn <sub>THF</sub> 2 | -2927.618116 | 0.416686 | -2927.201431 |
| RCc_Me <sub>2</sub> MgZn <sub>THF</sub> 2 | -2927.557675 | 0.408227 | -2927.149449 |
| TSa_Me <sub>2</sub> MgZn <sub>THF</sub> 2 | -2927.533875 | 0.414697 | -2927.119178 |
| PRc_Me <sub>2</sub> MgZn <sub>THF</sub> 2 | -2927.604792 | 0.418755 | -2927.186038 |
| RC_MgCl <sub>2</sub> Zn                   | -3303.689607 | 0.125812 | -3303.563796 |
| TS_MgCl <sub>2</sub> Zn                   | -3303.655140 | 0.127571 | -3303.527569 |
| PR_MgCl <sub>2</sub> Zn                   | -3303.736677 | 0.129871 | -3303.606806 |
| RCa_MgCl <sub>2</sub> Zn <sub>THF</sub> 1 | -3536.024658 | 0.236939 | -3535.787719 |
| TSa_MgCl <sub>2</sub> Zn <sub>THF</sub> 1 | -3535.990430 | 0.238498 | -3535.751931 |
| PRa_MgCl <sub>2</sub> Zn <sub>THF</sub> 1 | -3536.067482 | 0.243454 | -3535.824028 |
| RCb_MgCl <sub>2</sub> Zn <sub>THF</sub> 1 | -3536.028744 | 0.235720 | -3535.793024 |
| TSb_MgCl <sub>2</sub> Zn <sub>THF</sub> 1 | -3535.988839 | 0.236061 | -3535.752778 |
| PRb_MgCl <sub>2</sub> Zn <sub>THF</sub> 1 | -3536.072221 | 0.241460 | -3535.830761 |
| RCa_MgCl <sub>2</sub> Zn <sub>THF</sub> 2 | -3768.354887 | 0.348323 | -3768.006565 |
| TSa_MgCl <sub>2</sub> Zn <sub>THF</sub> 2 | -3768.314593 | 0.349725 | -3767.964868 |

|                                                                  |              |          |              |
|------------------------------------------------------------------|--------------|----------|--------------|
| PRa_MgCl <sub>2</sub> Zn <sub>THF2</sub>                         | -3768.401176 | 0.353896 | -3768.047280 |
| RCb_MgCl <sub>2</sub> Zn <sub>THF2</sub>                         | -3768.350949 | 0.344655 | -3768.006293 |
| TSb_MgCl <sub>2</sub> Zn <sub>THF2</sub>                         | -3768.311744 | 0.345949 | -3767.965794 |
| PRb_MgCl <sub>2</sub> Zn <sub>THF2</sub>                         | -3768.396262 | 0.353433 | -3768.042830 |
| RCc_MgCl <sub>2</sub> Zn <sub>THF2</sub>                         | -3768.352285 | 0.344054 | -3768.008230 |
| TSc_MgCl <sub>2</sub> Zn <sub>THF2</sub>                         | -3768.316514 | 0.349752 | -3767.966762 |
| PRc_MgCl <sub>2</sub> Zn <sub>THF2</sub>                         | -3768.388382 | 0.355576 | -3768.032806 |
| RC <sub>gm</sub> _MeMg(μ-Cl) <sub>2</sub> MeMg                   | -1724.722133 | 0.121853 | -1724.600280 |
| TS <sub>gm</sub> _MeMg(μ-Cl) <sub>2</sub> MeMg                   | -1724.682595 | 0.125506 | -1724.557089 |
| PR <sub>gm</sub> _MeMg(μ-Cl) <sub>2</sub> MeMg                   | -1724.740428 | 0.127041 | -1724.613388 |
| RC <sub>vi</sub> _MeMg(μ-Cl) <sub>2</sub> MeMg                   | -1724.722310 | 0.121951 | -1724.600359 |
| TS <sub>vi</sub> _MeMg(μ-Cl) <sub>2</sub> MeMg                   | -1724.685266 | 0.124169 | -1724.561098 |
| PR <sub>vi</sub> _MeMg(μ-Cl) <sub>2</sub> MeMg                   | -1724.766572 | 0.127625 | -1724.638947 |
| RC <sub>gm</sub> _MeMg(μ-Cl)(μ-Me)MgCl                           | -1724.718908 | 0.124733 | -1724.594175 |
| TS <sub>gm</sub> _MeMg(μ-Cl)(μ-Me)MgCl                           | -1724.680226 | 0.126596 | -1724.553630 |
| PR <sub>gm</sub> _MeMg(μ-Cl)(μ-Me)MgCl                           | -1724.735803 | 0.130775 | -1724.605028 |
| RC <sub>vi</sub> _MgCl(μ-Cl)(μ-Me)MeMg                           | -1724.719472 | 0.124203 | -1724.595269 |
| TS <sub>vi</sub> _MgCl(μ-Cl)(μ-Me)MeMg                           | -1724.682773 | 0.128076 | -1724.554696 |
| PR <sub>vi</sub> _MgCl(μ-Cl)(μ-Me)MeMg                           | -1724.763370 | 0.131190 | -1724.632180 |
| RC <sub>gm</sub> _MeMg(μ-Cl) <sub>2</sub> MeMg <sub>THF3</sub>   | -2421.692771 | 0.453794 | -2421.238977 |
| TS <sub>gm</sub> _MeMg(μ-Cl) <sub>2</sub> MeMg <sub>THF3</sub>   | -2421.668330 | 0.456664 | -2421.211666 |
| PR <sub>gm</sub> _MeMg(μ-Cl) <sub>2</sub> MeMg <sub>THF3</sub>   | -2421.731539 | 0.460124 | -2421.271414 |
| RC <sub>vi</sub> _MeMg(μ-Cl) <sub>2</sub> MeMg <sub>THF3</sub>   | -2421.692922 | 0.451936 | -2421.240986 |
| TS <sub>vi</sub> _MeMg(μ-Cl) <sub>2</sub> MeMg <sub>THF3</sub>   | -2421.664983 | 0.455969 | -2421.209014 |
| PR <sub>vi</sub> _MeMg(μ-Cl) <sub>2</sub> MeMg <sub>THF3</sub>   | -2421.745179 | 0.463832 | -2421.281347 |
| RC <sub>gm</sub> _MeMg(μ-Cl)(μ-Me)MgCl <sub>THF3</sub>           | -2421.693754 | 0.455481 | -2421.238272 |
| TS <sub>gm</sub> _MeMg(μ-Cl)(μ-Me)MgCl <sub>THF3</sub>           | -2421.668514 | 0.458937 | -2421.209577 |
| PR <sub>gm</sub> _MeMg(μ-Cl)(μ-Me)MgCl <sub>THF3</sub>           | -2421.733978 | 0.469853 | -2421.264125 |
| RC <sub>vi</sub> _MgCl(μ-Cl)(μ-Me)MeMg <sub>THF3</sub>           | -2421.693886 | 0.45612  | -2421.237767 |
| TS <sub>vi</sub> _MgCl(μ-Cl)(μ-Me)MeMg <sub>THF3</sub>           | -2421.663582 | 0.456501 | -2421.207081 |
| PR <sub>vi</sub> _MgCl(μ-Cl)(μ-Me)MeMg <sub>THF3</sub>           | -2421.754009 | 0.462434 | -2421.291574 |
| TS_MgCl(μ-Cl)(μ-Me)MeMg <sub>THF3</sub>                          | -2421.688774 | 0.455153 | -2421.233621 |
| RC <sub>vi</sub> _MgCl(μ-Cl)Me <sub>2</sub> Mg <sub>THF3</sub>   | -2421.689668 | 0.456017 | -2421.233651 |
| RC <sub>gm</sub> _MeMg(μ-Cl) <sub>2</sub> MeMgZn                 | -3583.541308 | 0.185919 | -3583.355389 |
| TS <sub>gm</sub> _MeMg(μ-Cl) <sub>2</sub> MeMgZn                 | -3583.513754 | 0.189886 | -3583.323868 |
| PR <sub>gm</sub> _MeMg(μ-Cl) <sub>2</sub> MeMgZn                 | -3583.589418 | 0.191758 | -3583.397660 |
| RC <sub>vi</sub> _MeMg(μ-Cl) <sub>2</sub> MeMgZn                 | -3583.547731 | 0.184082 | -3583.363649 |
| TS <sub>vi</sub> _MeMg(μ-Cl) <sub>2</sub> MeMgZn                 | -3583.502271 | 0.191667 | -3583.310604 |
| PR <sub>vi</sub> _MeMg(μ-Cl) <sub>2</sub> MeMgZn                 | -3583.554454 | 0.194280 | -3583.360174 |
| RC <sub>gm</sub> _MeMg(μ-Cl)(μ-Me)MgClZn                         | -3583.537650 | 0.187875 | -3583.349774 |
| TS <sub>gm</sub> _MeMg(μ-Cl)(μ-Me)MgClZn                         | -3583.510990 | 0.192709 | -3583.318281 |
| PR <sub>gm</sub> _MeMg(μ-Cl)(μ-Me)MgClZn                         | -3583.586955 | 0.193335 | -3583.393619 |
| RC <sub>vi</sub> _MgCl(μ-Cl)(μ-Me)MeMgZn                         | -3583.549416 | 0.193758 | -3583.355658 |
| TS <sub>vi</sub> _MgCl(μ-Cl)(μ-Me)MeMgZn                         | -3583.501879 | 0.192302 | -3583.309577 |
| PR <sub>vi</sub> _MgCl(μ-Cl)(μ-Me)MeMgZn                         | -3583.585288 | 0.196147 | -3583.389141 |
| RC <sub>gm</sub> _MeMg(μ-Cl) <sub>2</sub> MeMgZn <sub>THF3</sub> | -4280.518958 | 0.519834 | -4279.999125 |
| TS <sub>gm</sub> _MeMg(μ-Cl) <sub>2</sub> MeMgZn <sub>THF3</sub> | -4280.501087 | 0.522843 | -4279.978244 |
| PR <sub>gm</sub> _MeMg(μ-Cl) <sub>2</sub> MeMgZn <sub>THF3</sub> | -4280.571553 | 0.523490 | -4280.048063 |
| RC <sub>vi</sub> _MeMg(μ-Cl) <sub>2</sub> MeMgZn <sub>THF3</sub> | -4280.517944 | 0.520713 | -4279.997231 |
| TS <sub>vi</sub> _MeMg(μ-Cl) <sub>2</sub> MeMgZn <sub>THF3</sub> | -4280.478574 | 0.524483 | -4279.972387 |
| PR <sub>vi</sub> _MeMg(μ-Cl) <sub>2</sub> MeMgZn <sub>THF3</sub> | -4280.565304 | 0.525611 | -4280.039692 |
| RC <sub>gm</sub> _MeMg(μ-Cl)(μ-Me)MgClZn <sub>THF3</sub>         | -4280.520080 | 0.520386 | -4279.999693 |
| TS <sub>gm</sub> _MeMg(μ-Cl)(μ-Me)MgClZn <sub>THF3</sub>         | -4280.502392 | 0.523681 | -4279.978580 |
| PR <sub>gm</sub> _MeMg(μ-Cl)(μ-Me)MgClZn <sub>THF3</sub>         | -4280.570356 | 0.527469 | -4280.042887 |
| RC <sub>vi</sub> _MgCl(μ-Cl)(μ-Me)MeMgZn <sub>THF3</sub>         | -4280.521623 | 0.524528 | -4279.997095 |
| TS <sub>vi</sub> _MgCl(μ-Cl)(μ-Me)MeMgZn <sub>THF3</sub>         | -4280.497356 | 0.521461 | -4279.975895 |
| PR <sub>vi</sub> _MgCl(μ-Cl)(μ-Me)MeMgZn <sub>THF3</sub>         | -4280.572839 | 0.528871 | -4280.043968 |
| RC <sub>vi</sub> _MgCl(μ-Cl)Me <sub>2</sub> MgZn <sub>THF3</sub> | -4280.523916 | 0.519265 | -4280.004665 |
| TS <sub>vi</sub> _MgCl(μ-Cl)Me <sub>2</sub> MgZn <sub>THF3</sub> | -4280.498870 | 0.521913 | -4279.976957 |



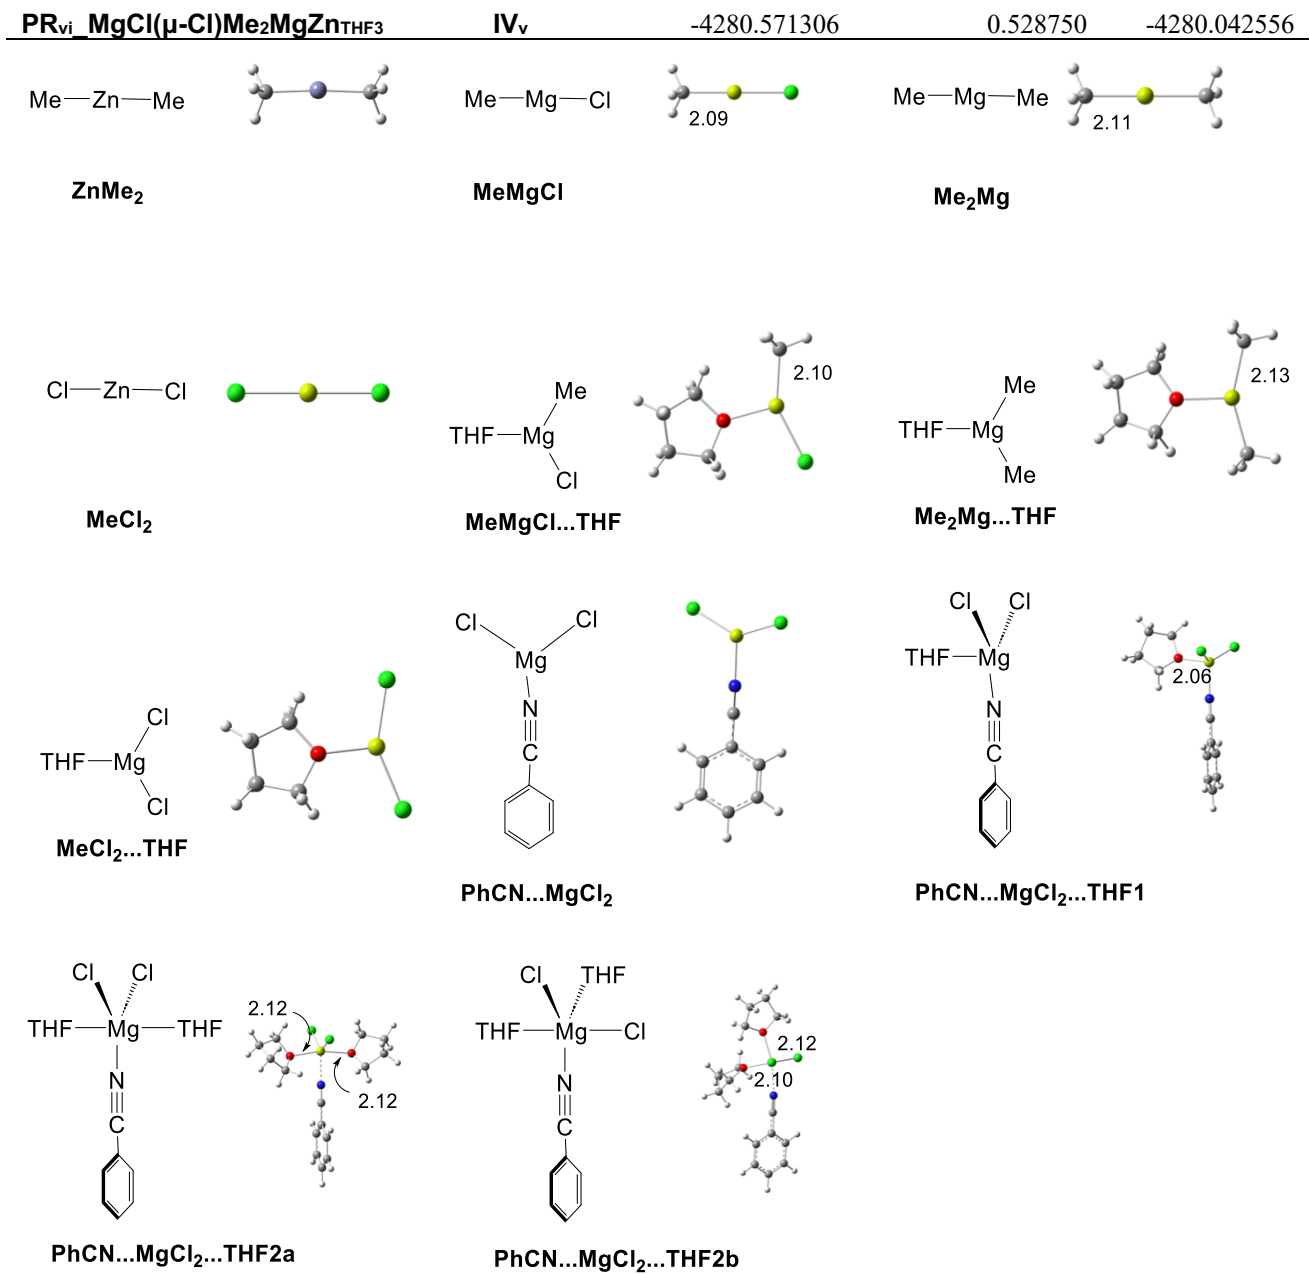

**Fig. S1.** Structures optimized at M06/6-31G(d,p) level. The bond lengths are shown in Angstrom.

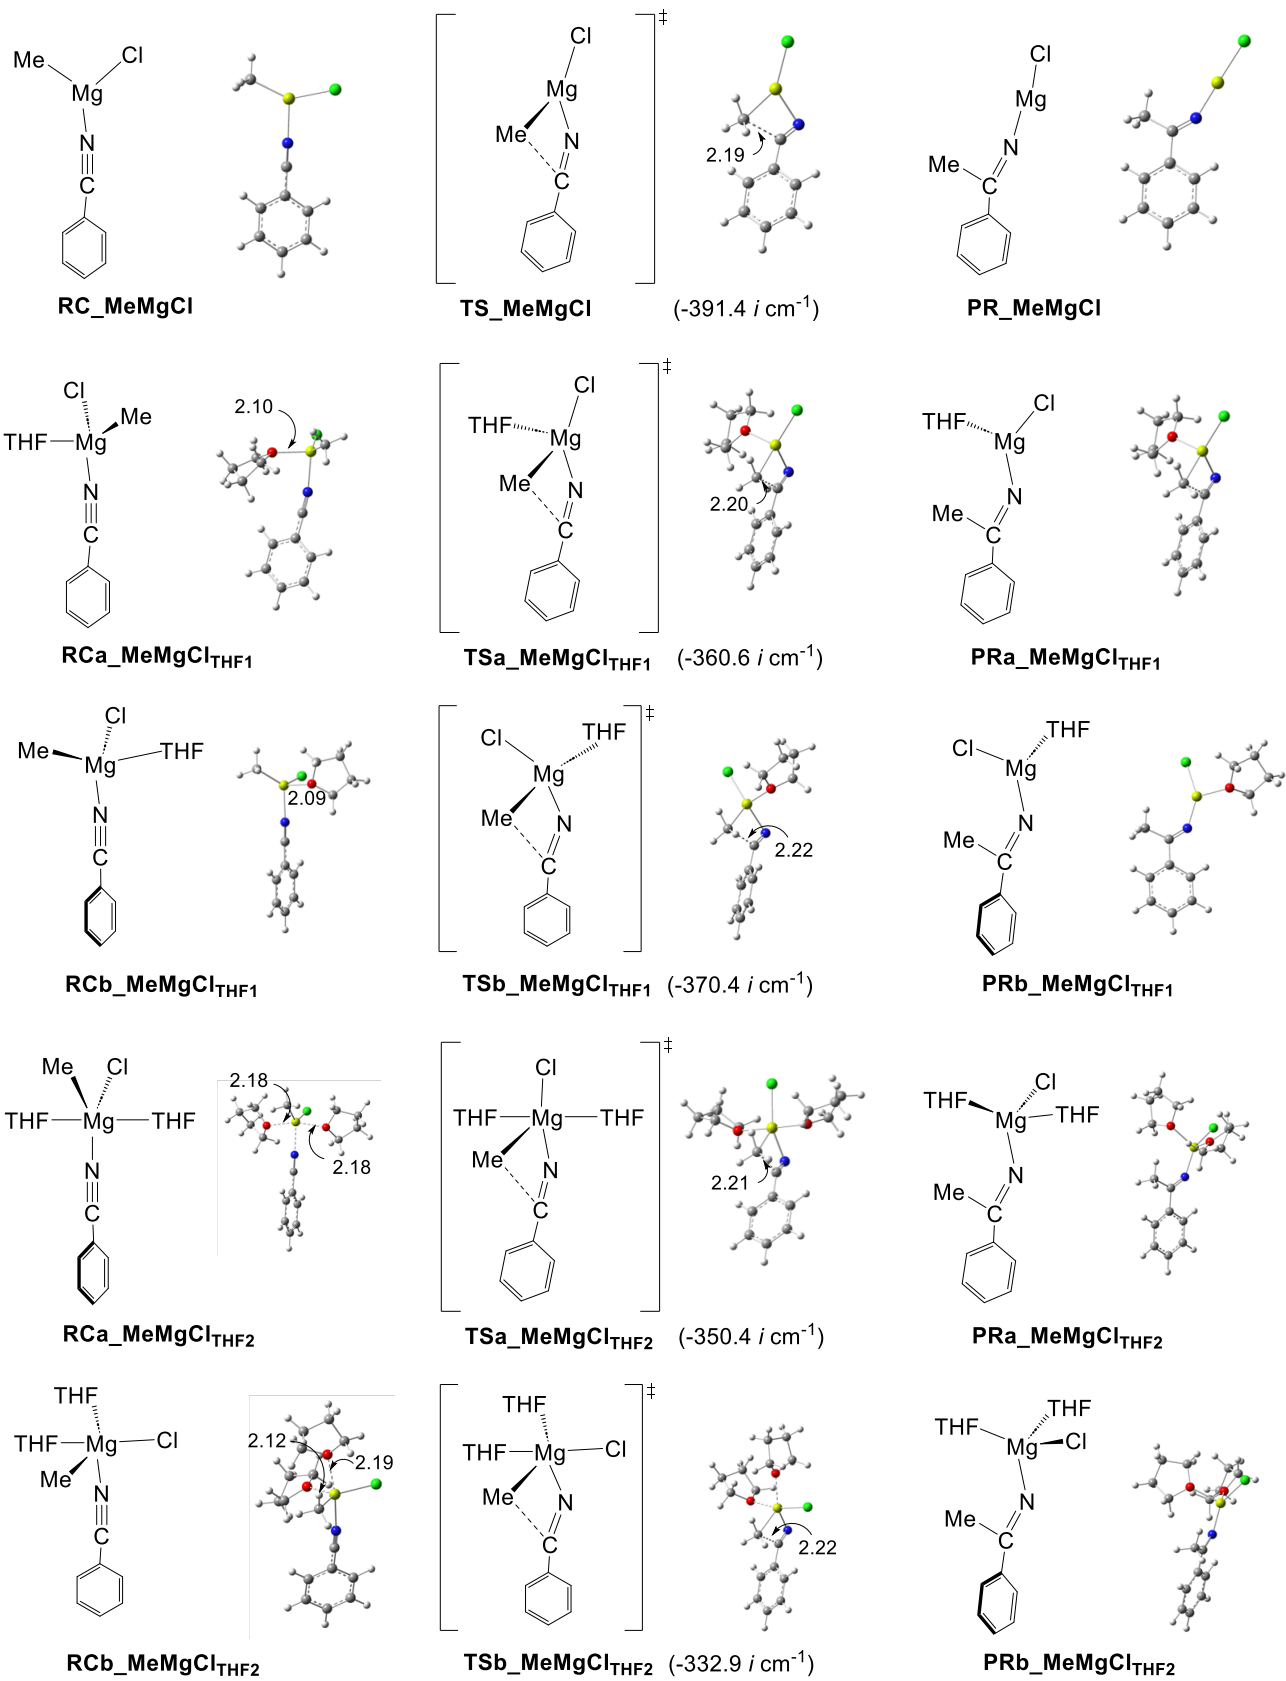

**Fig. S1. Continued.**

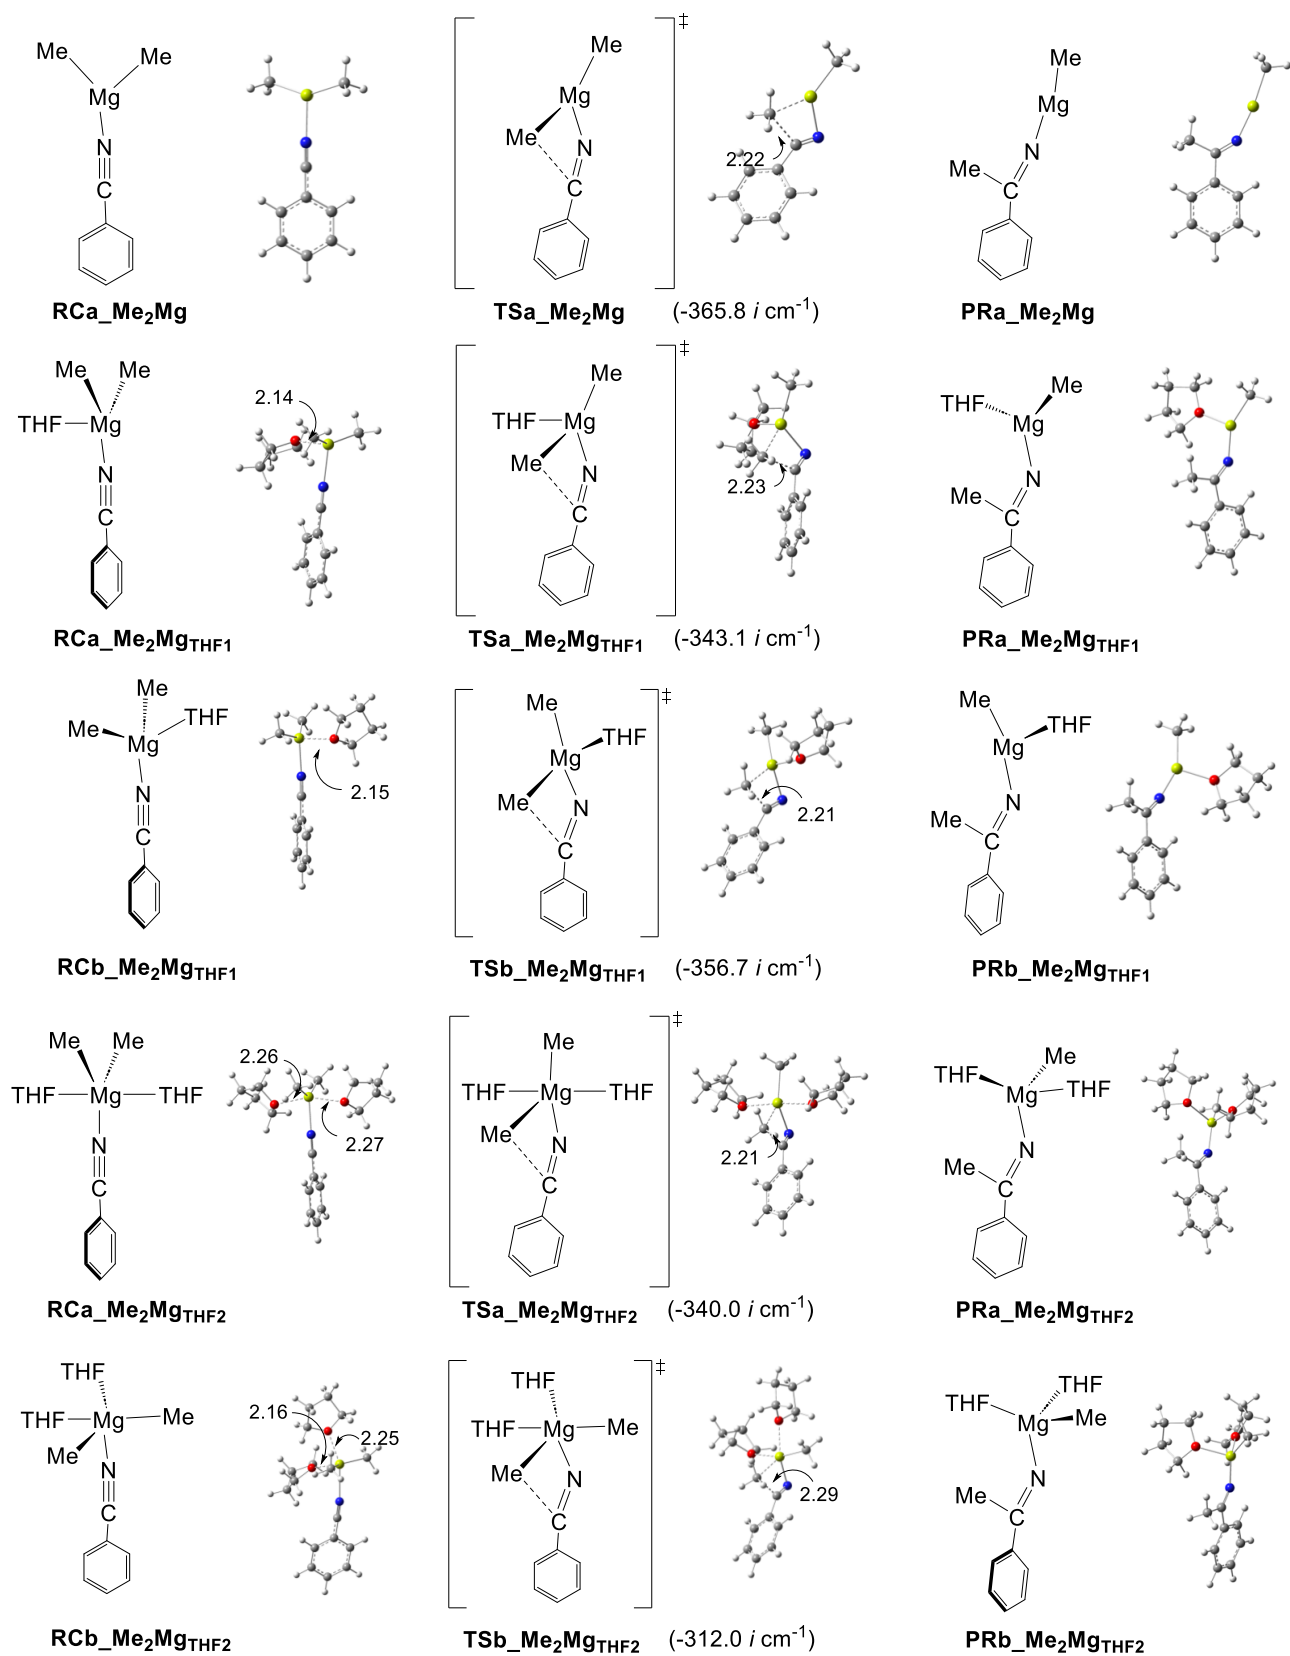

**Fig. S1.** *Continued.*

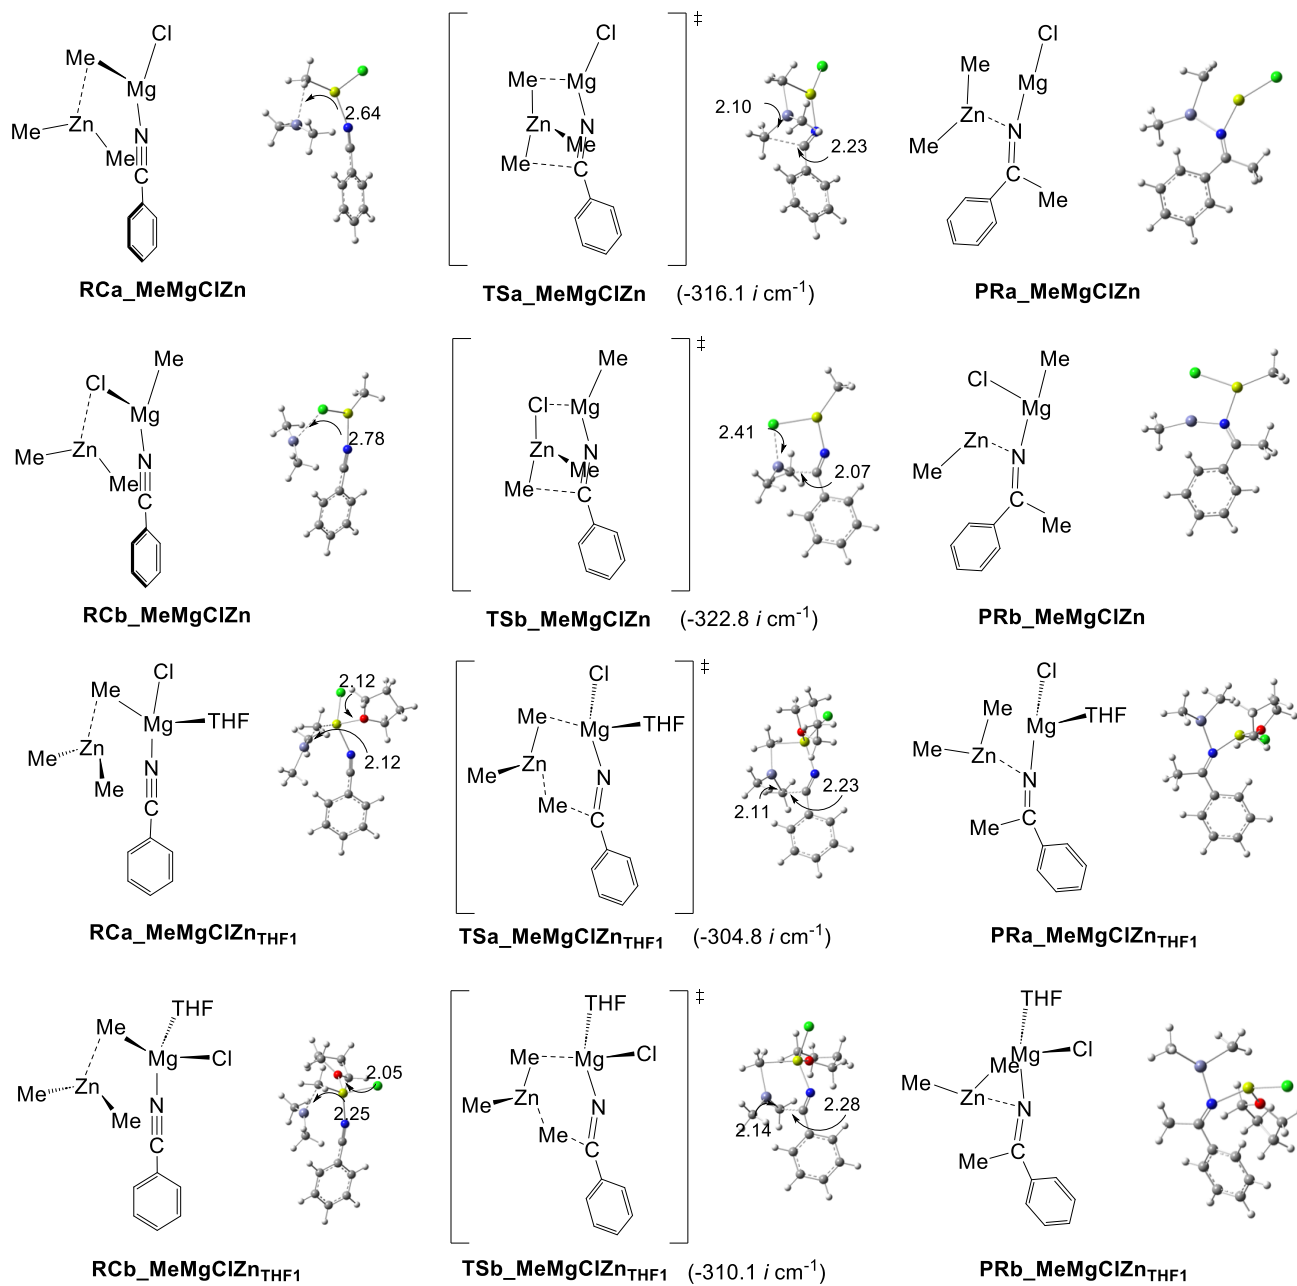

**Fig. S1.** *Continued.*

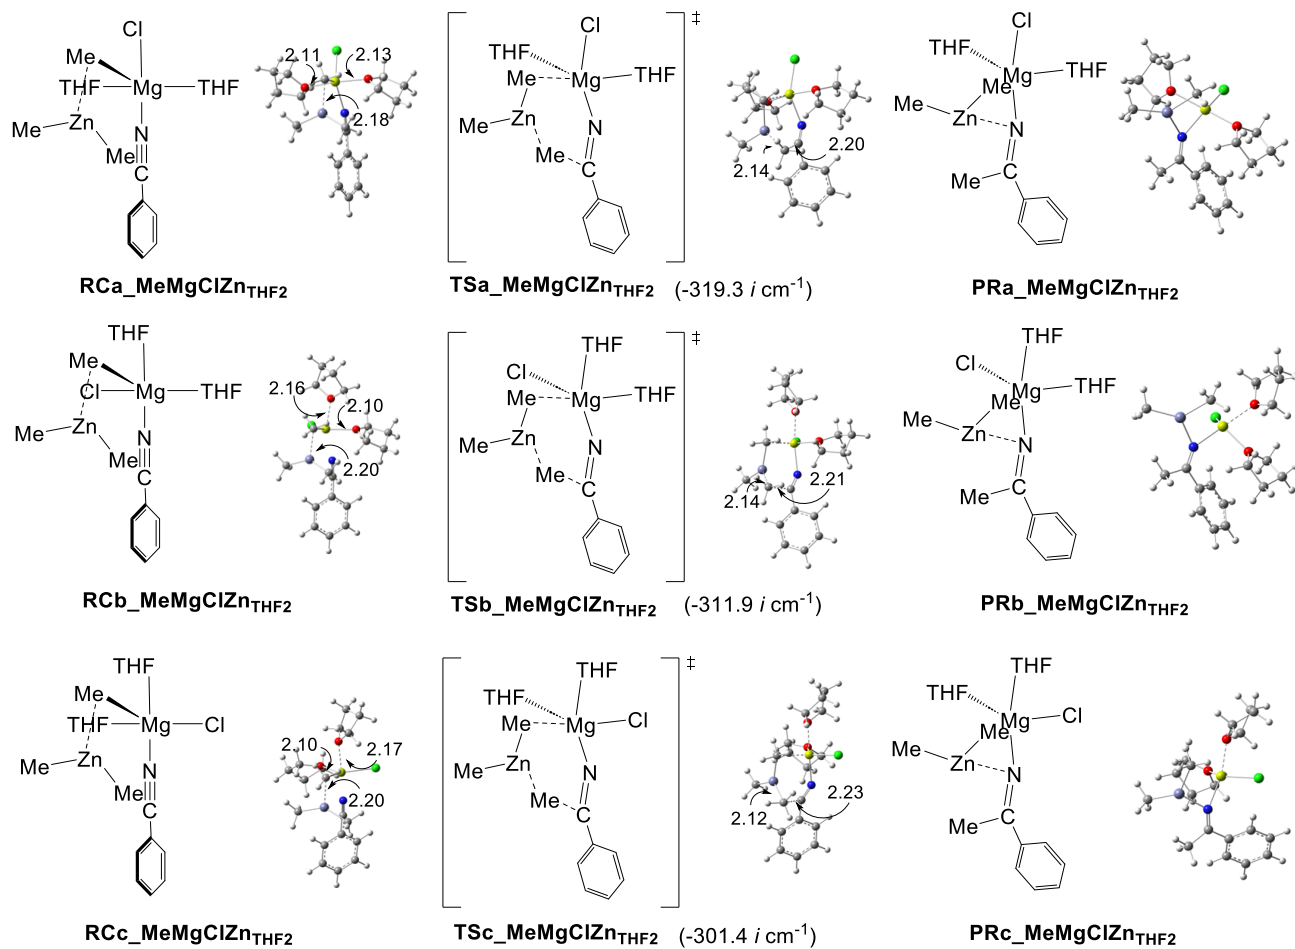

**Fig. S1.** *Continued.*

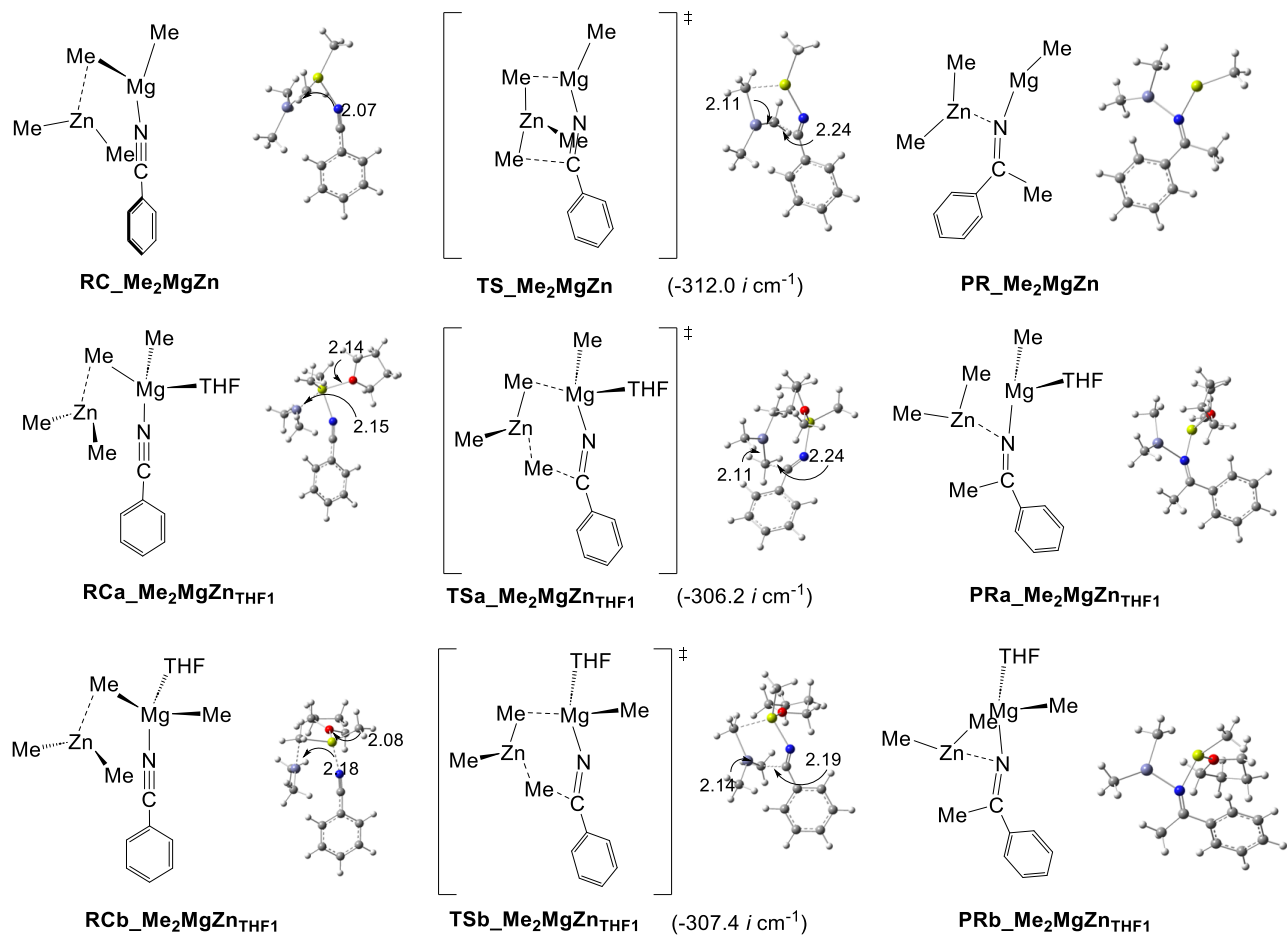

**Fig. S1. Continued.**

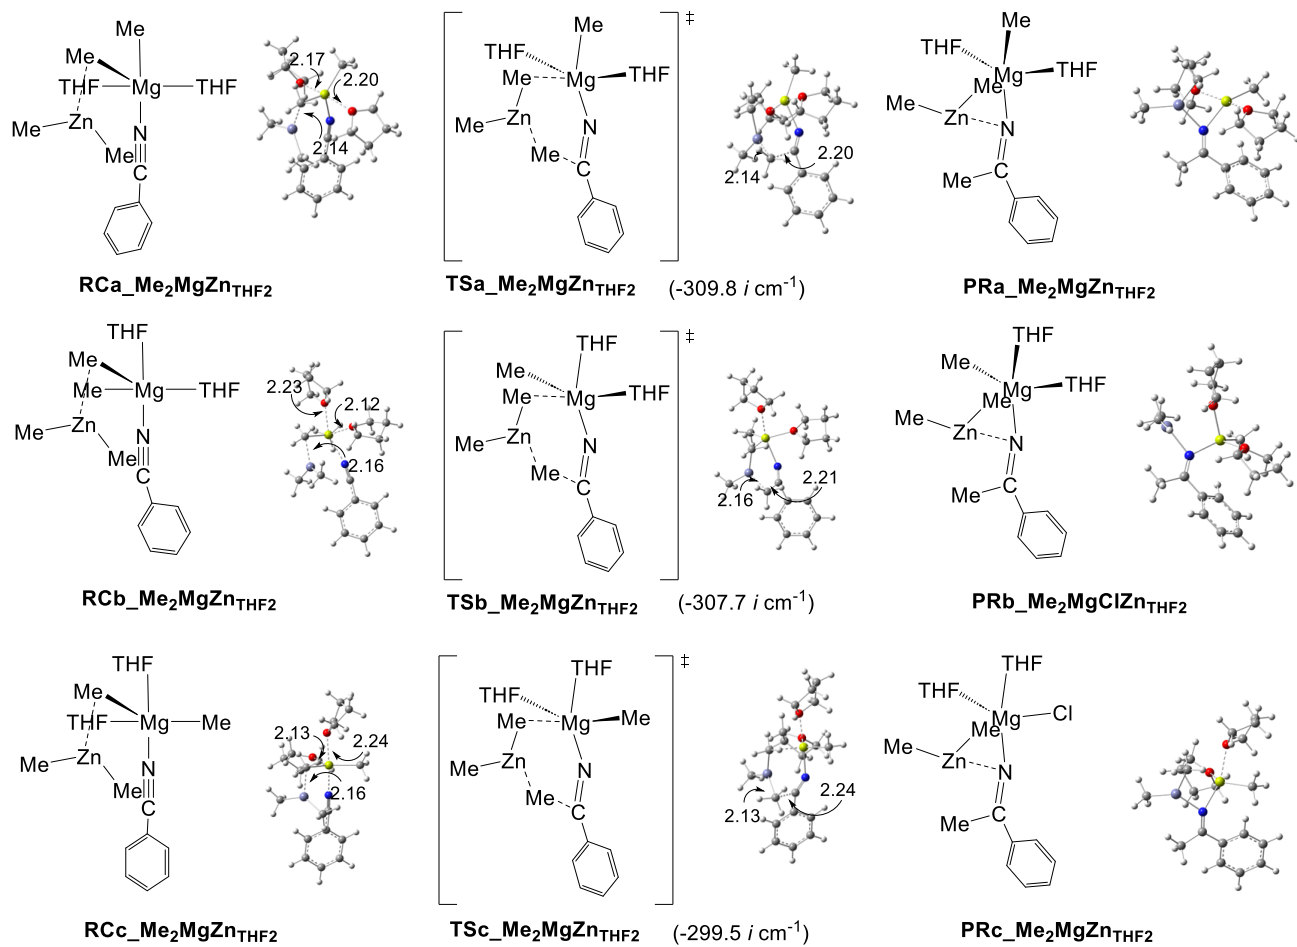

**Fig. S1.** *Continued.*

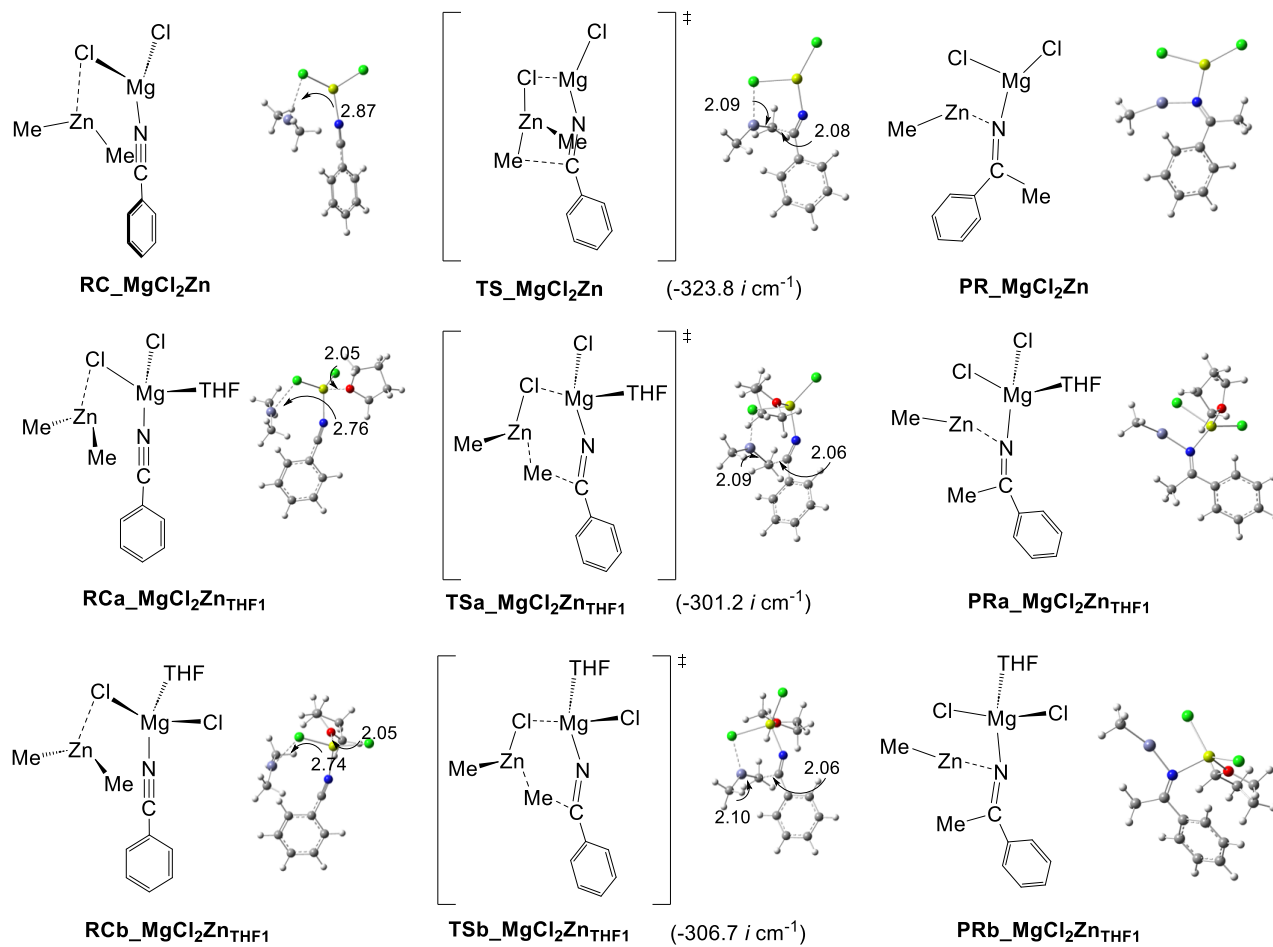

**Fig. S1.** *Continued.*



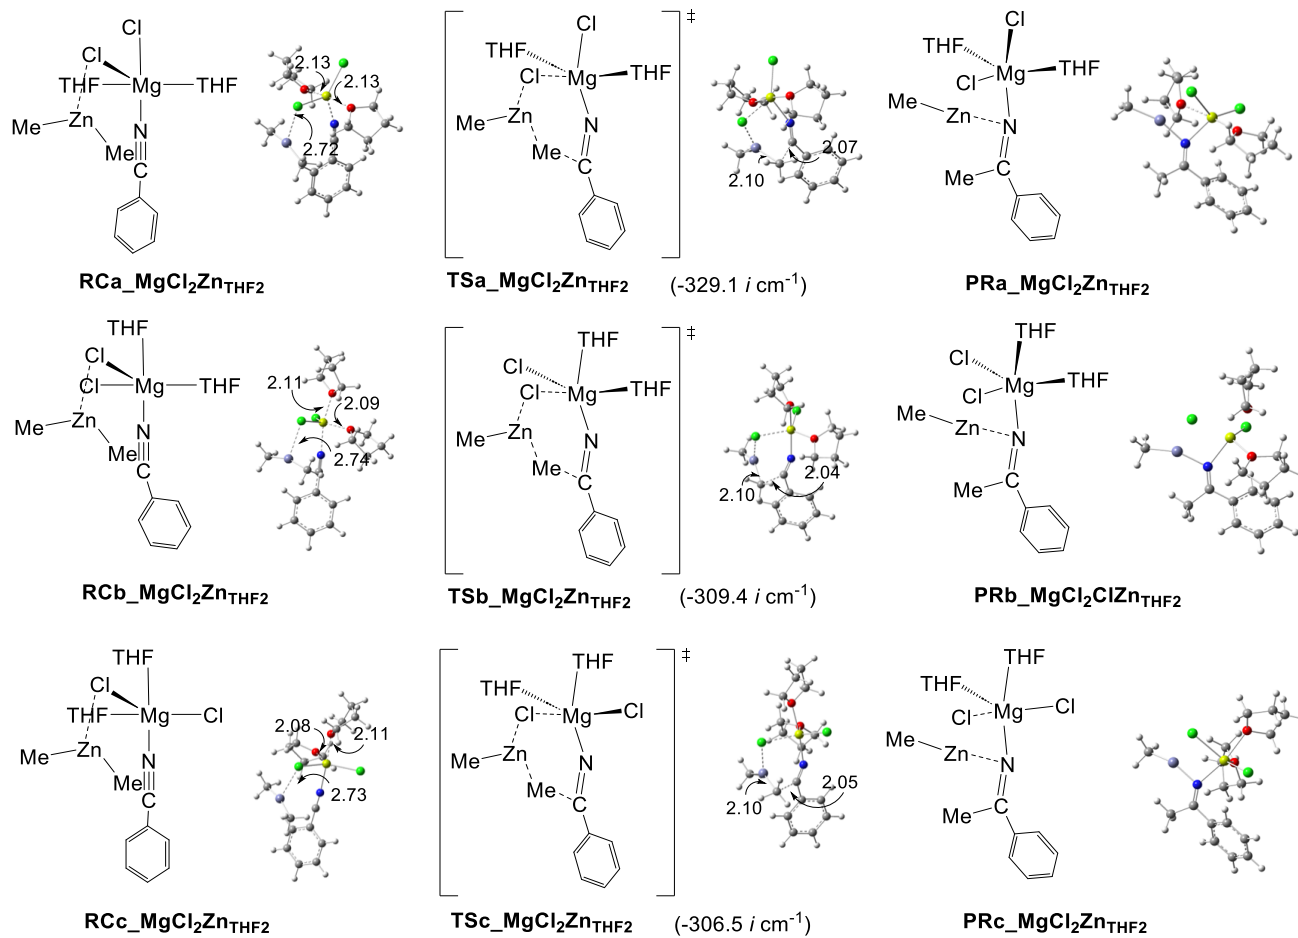

**Fig. S1.** *Continued.*

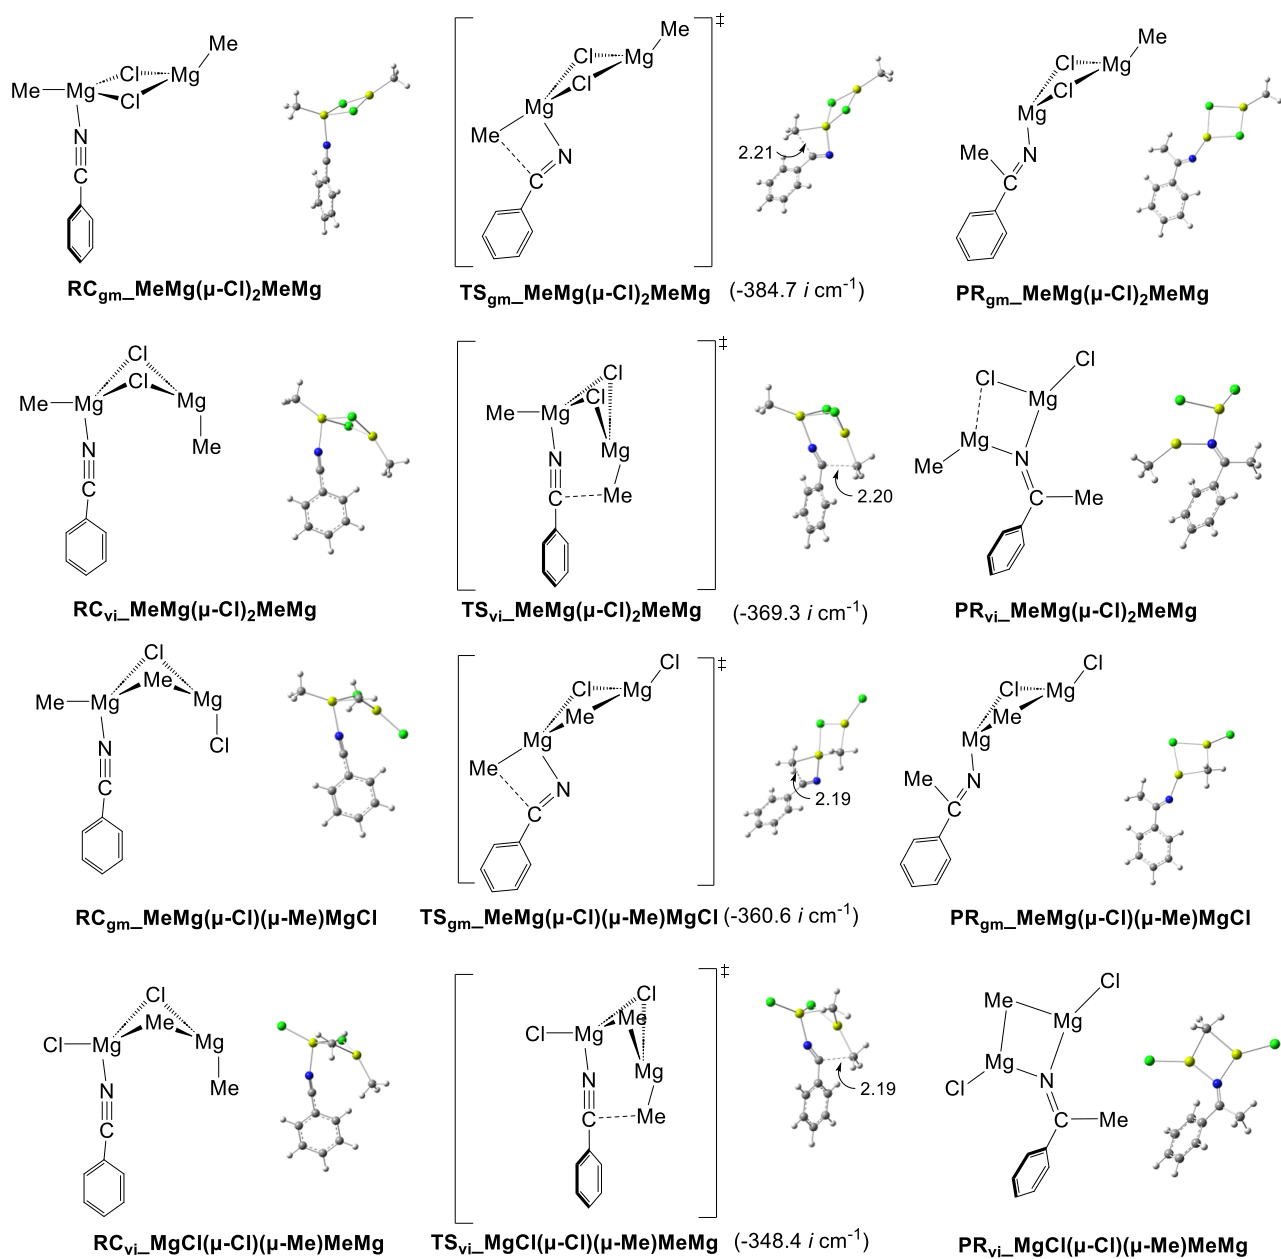

**Fig. S1.** *Continued.*

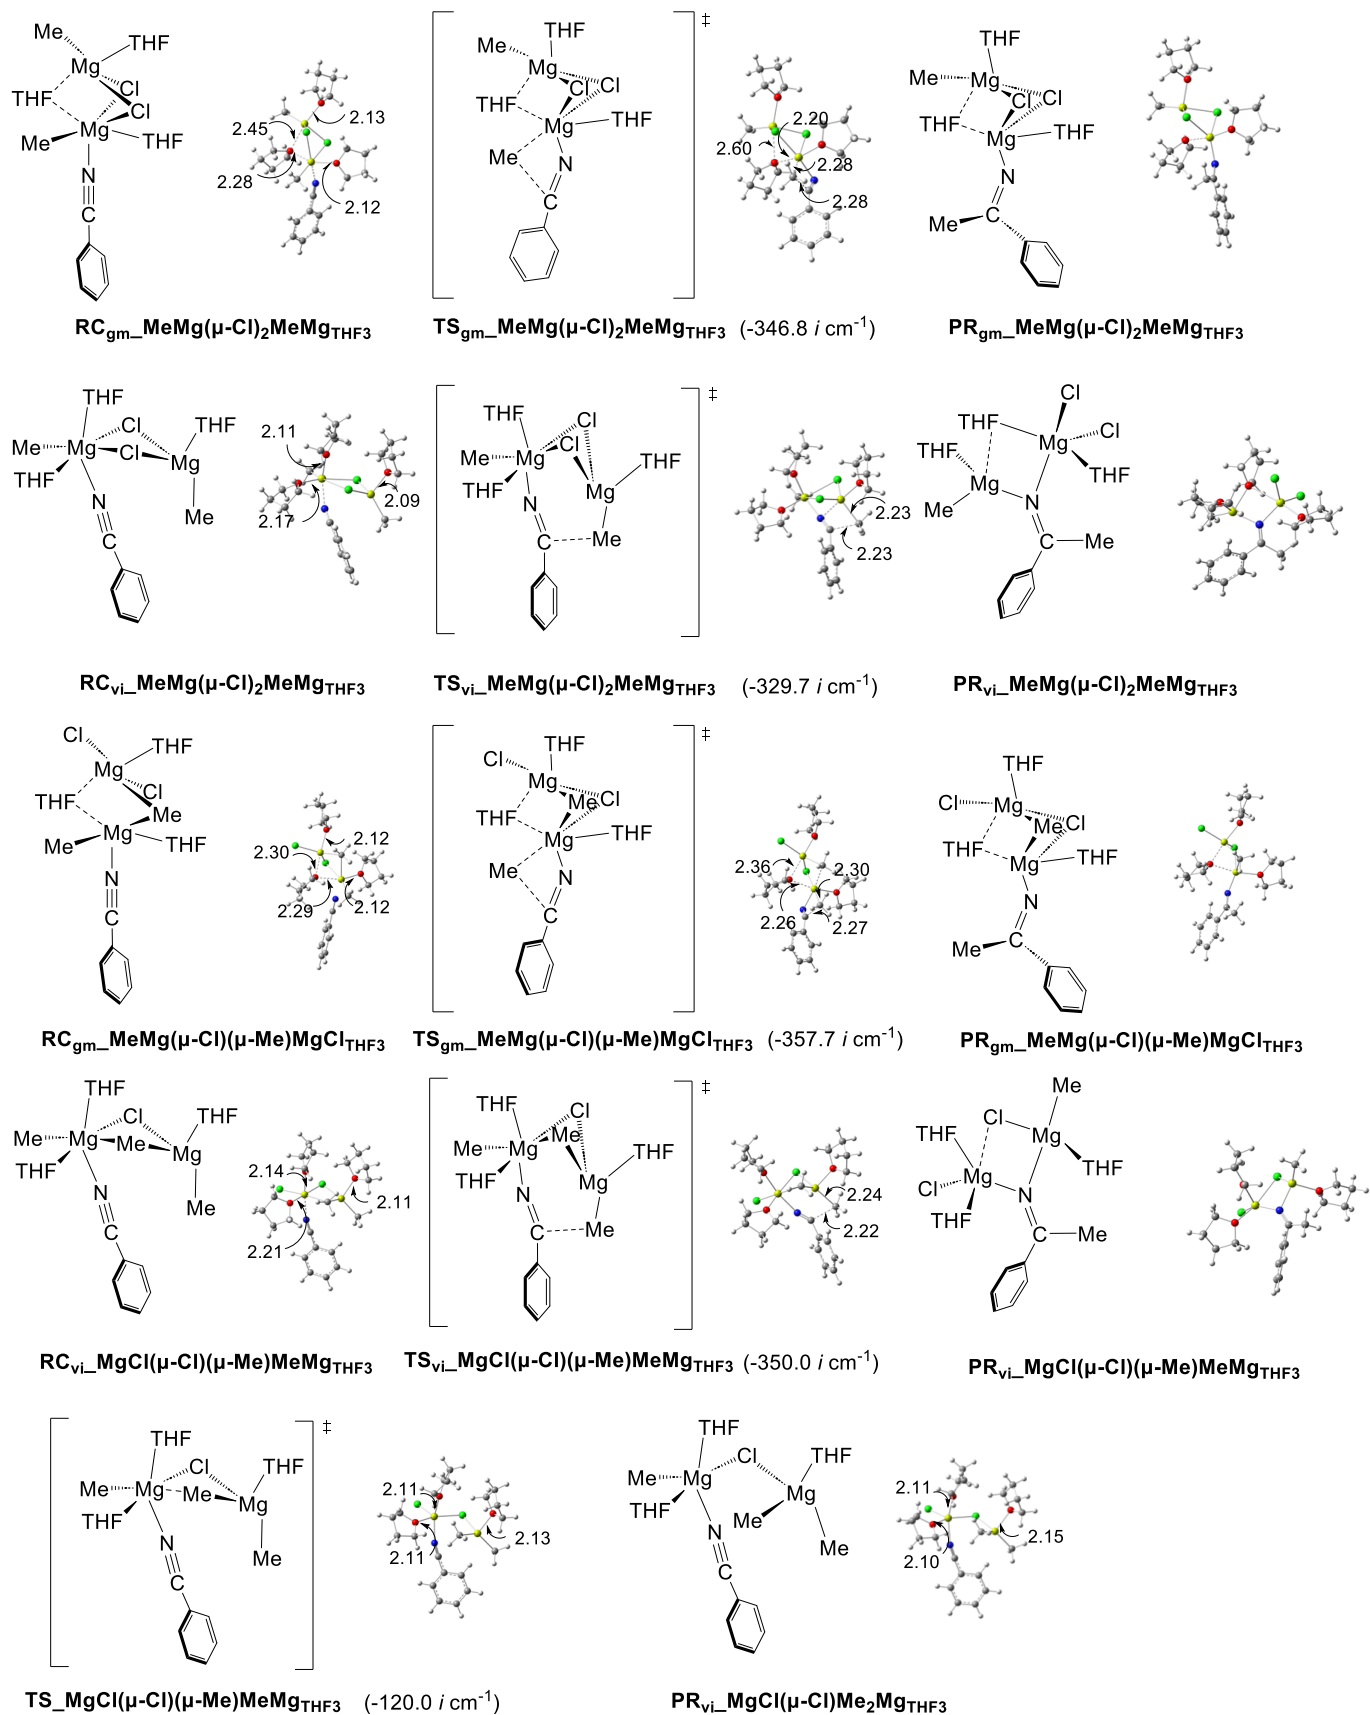

Fig. S1. Continued.

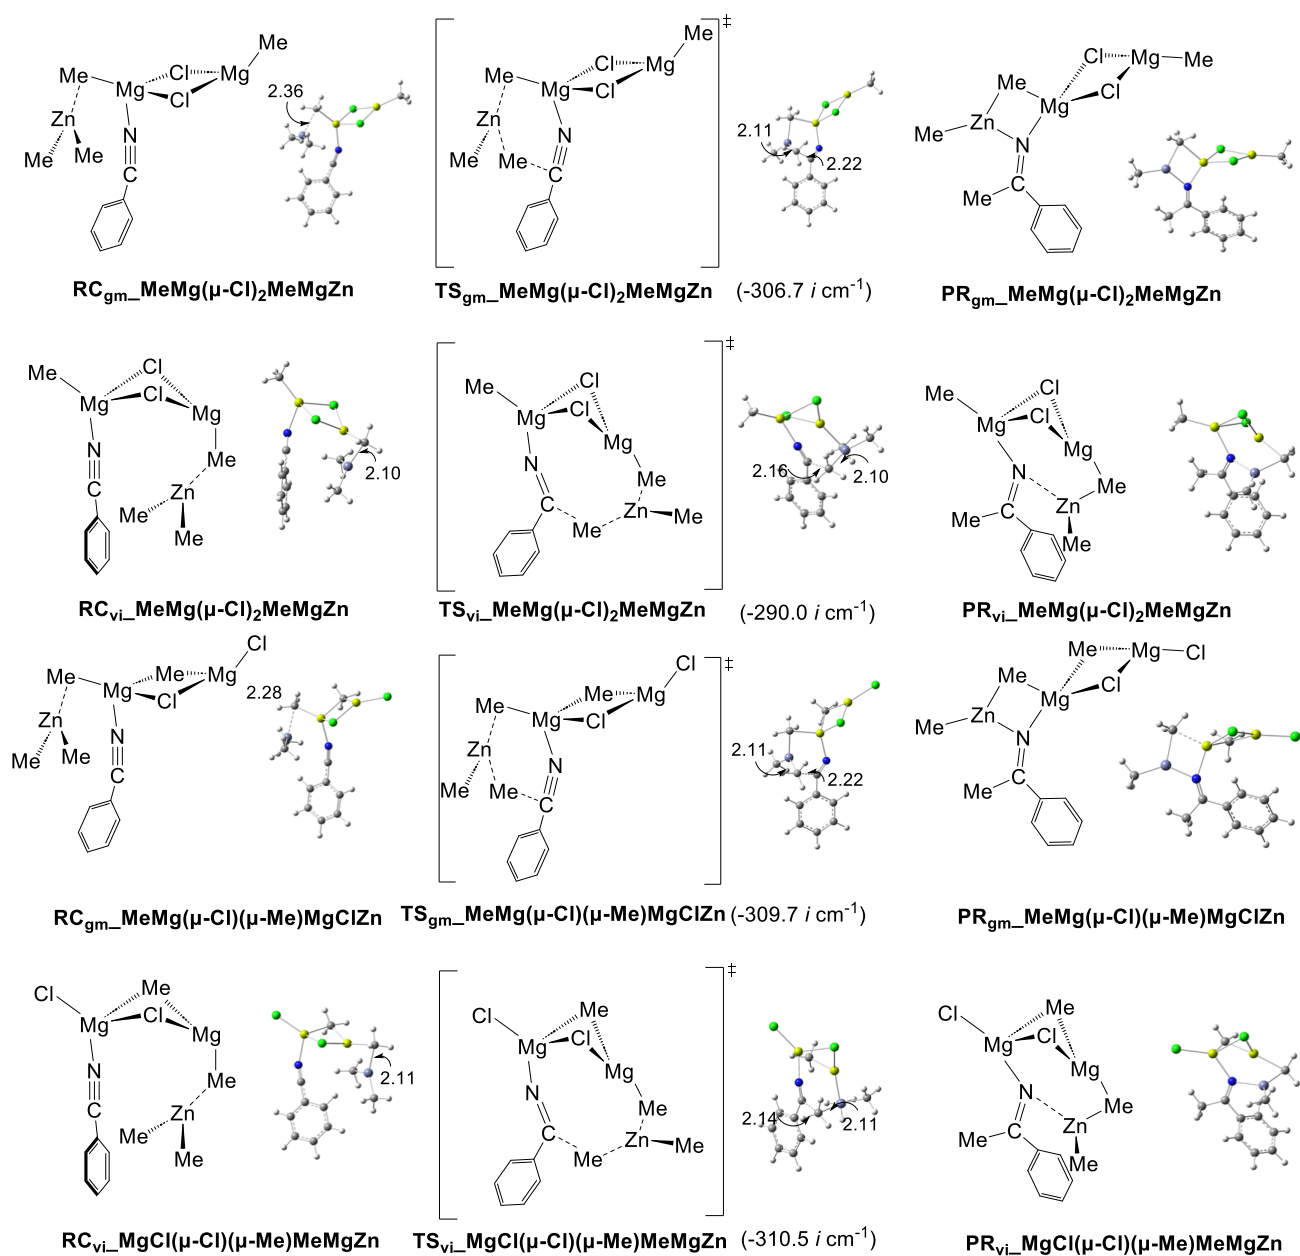

**Fig. S1.** *Continued.*

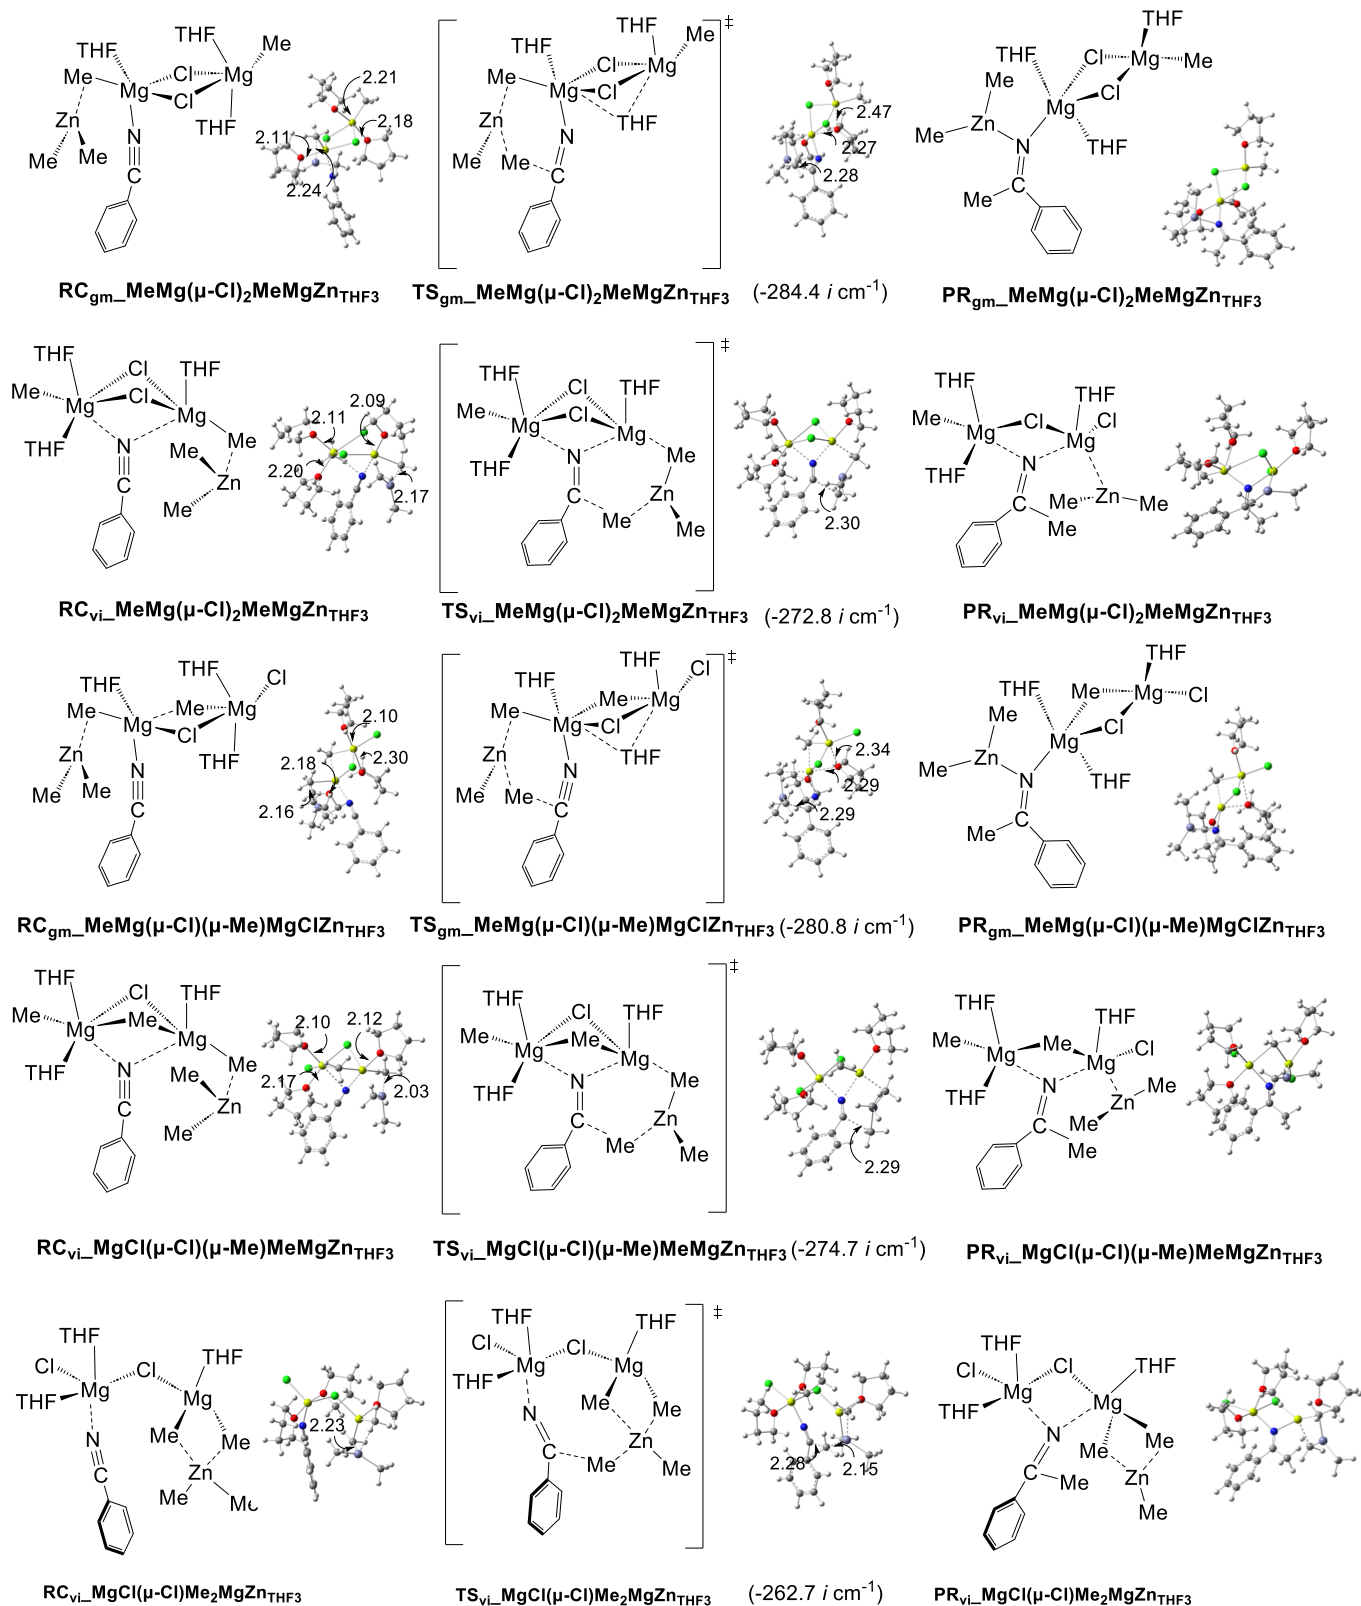

**Fig. S1. Continued.**

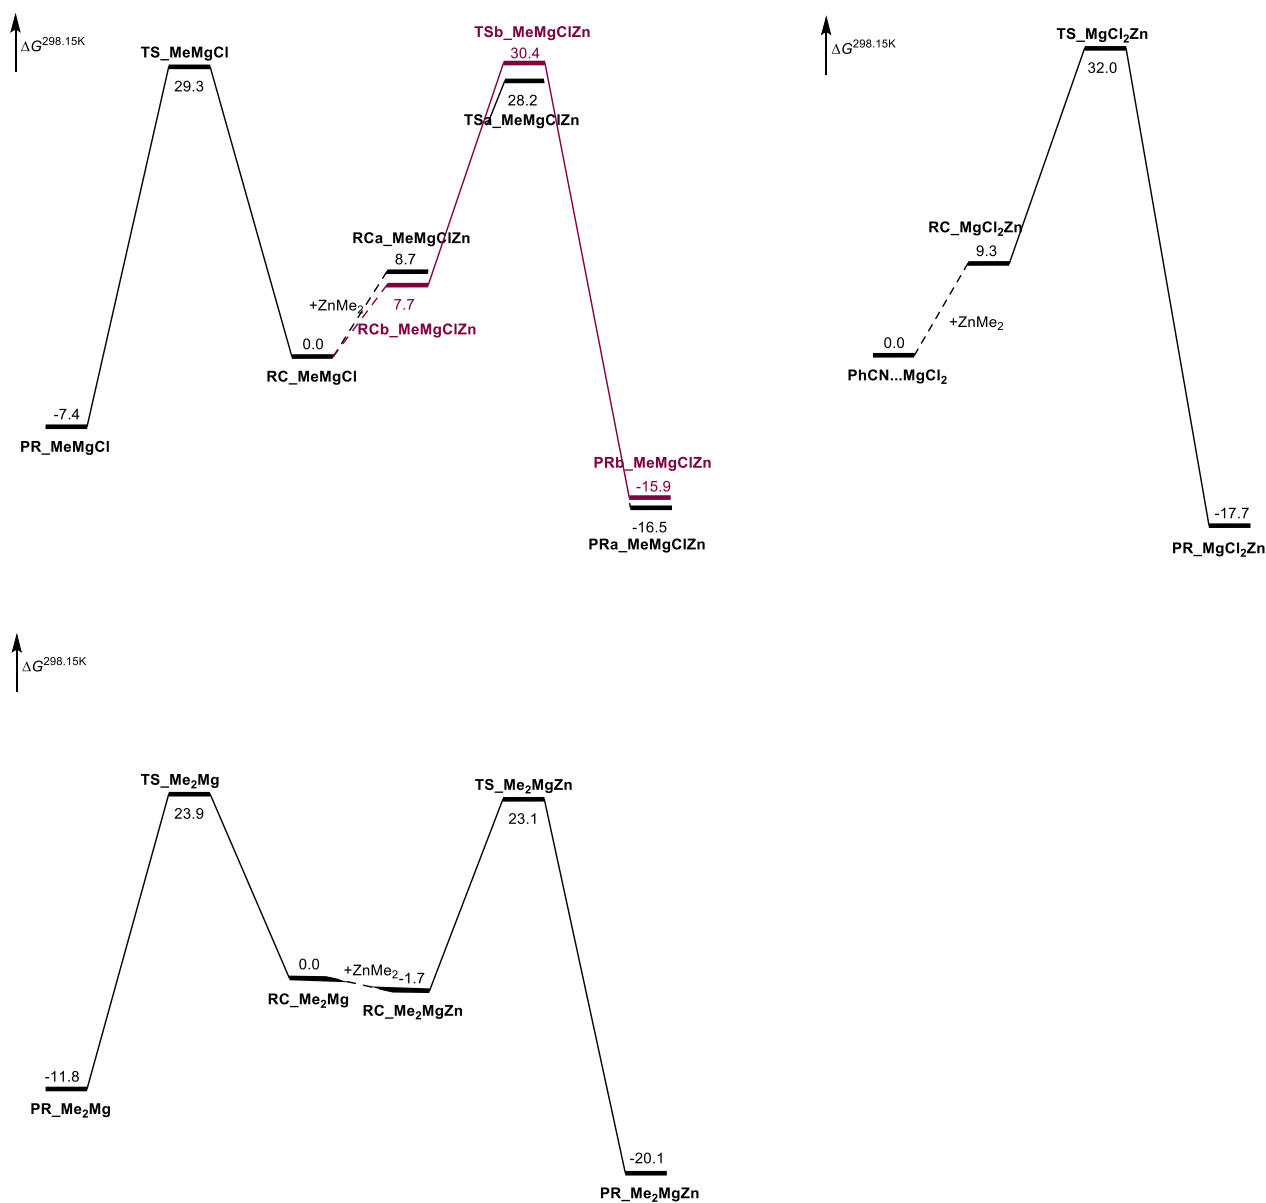

**Fig. S2.** Gibbs free energy (298.15 K) diagram of the mononuclear species for the Grignard reaction pathways when not coordinated with THF (kcal/mol).

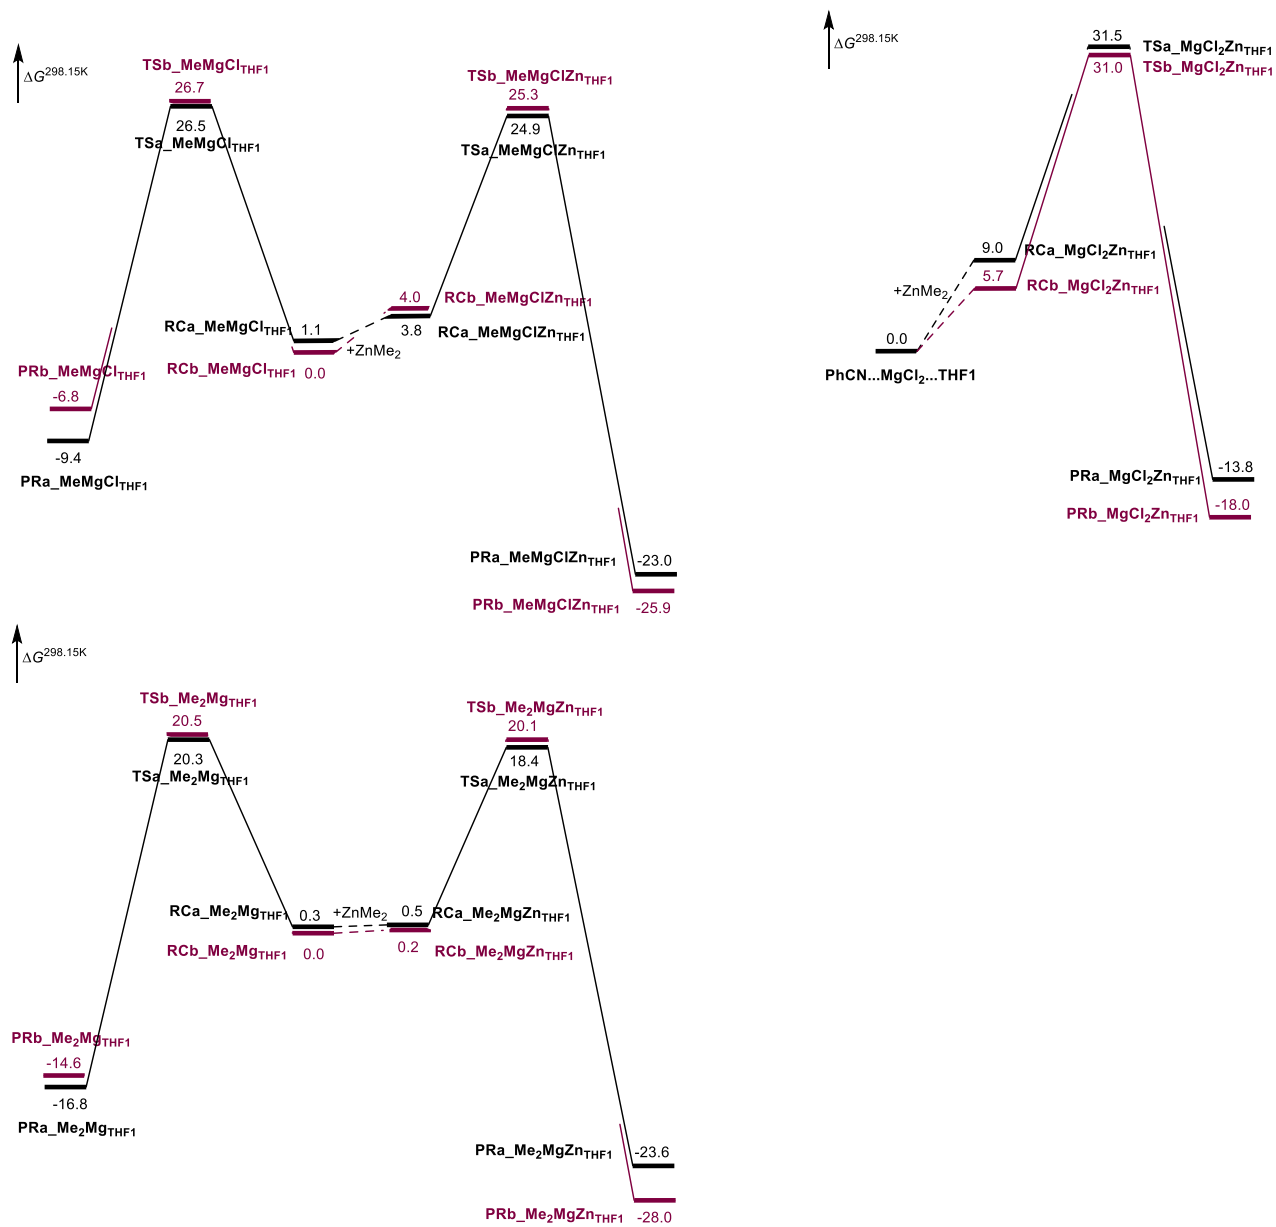

**Fig. S3.** Gibbs free energy (298.15 K) diagram of the mononuclear species for the Grignard reaction pathways when coordinated with one THF (kcal/mol)

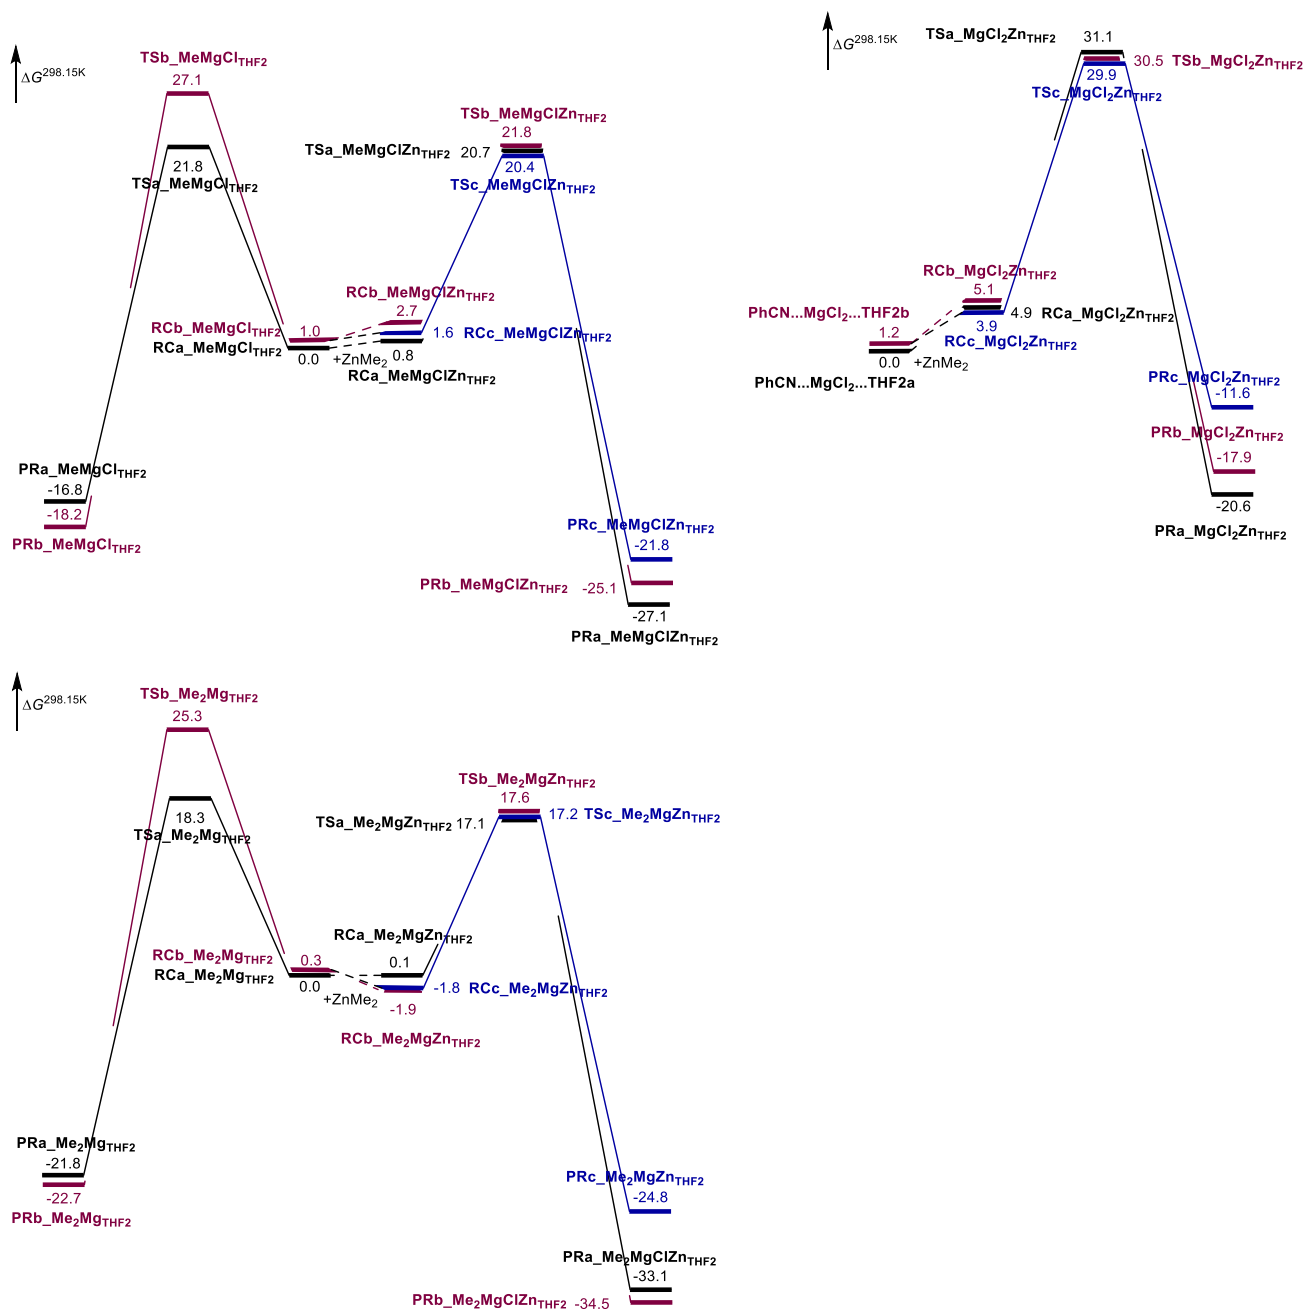

**Fig. S4.** Gibbs free energy (298.15 K) diagram of the mononuclear species for the Grignard reaction pathways when coordinated with two THFs (kcal/mol)



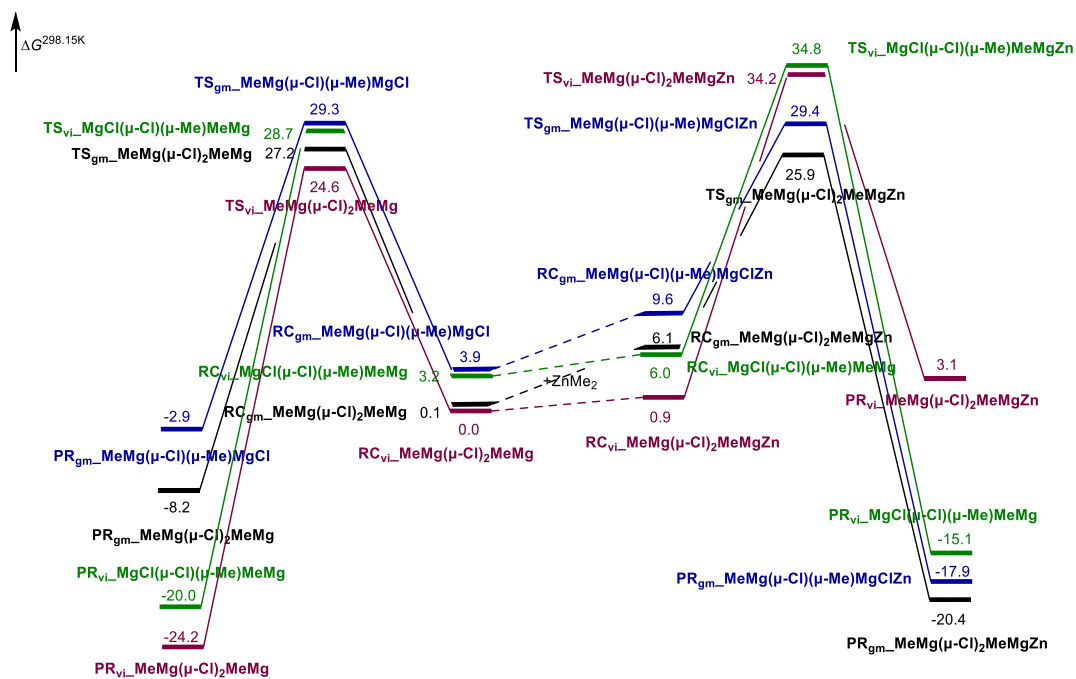

**Fig. S5.** Gibbs free energy (298.15 K) diagram of the binuclear species for the Grignard reaction pathways when not coordinated with THF (kcal/mol)

$\Delta G^{298.15K}$

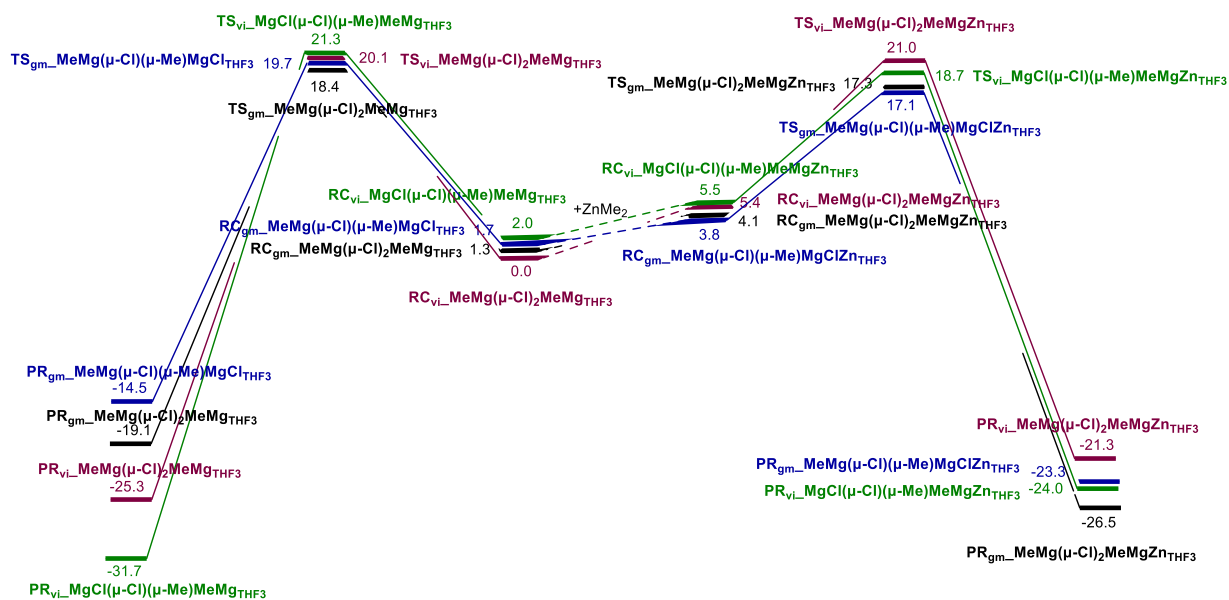

**Fig. S6.** Gibbs free energy (298.15 K) diagram of the binuclear species for the Grignard reaction pathways coordinated with 3 THFs (kcal/mol)

**Table S2.** Cartesian coordinates of stationary points at M06(6-31G(d,p) level are given below:

| <b>ZnMe<sub>2</sub></b> |                |           |           |
|-------------------------|----------------|-----------|-----------|
| Atom                    | Coordinate (Å) |           |           |
|                         | x              | y         | z         |
| Zn                      | 0.000000       | 0.026133  | -0.000158 |
| C                       | -1.919681      | -0.037210 | 0.000307  |
| H                       | -2.339301      | 0.078469  | 1.007239  |
| H                       | -2.369725      | 0.747554  | -0.620063 |
| H                       | -2.290191      | -0.994765 | -0.386656 |
| C                       | 1.919682       | -0.037209 | 0.000300  |
| H                       | 2.290268       | -0.993458 | -0.389802 |
| H                       | 2.369852       | 0.749648  | -0.617316 |
| H                       | 2.339094       | 0.075061  | 1.007707  |

| <b>MeMgCl</b> |                |           |           |
|---------------|----------------|-----------|-----------|
| Atom          | Coordinate (Å) |           |           |
|               | x              | y         | z         |
| Mg            | -0.508816      | 0.000105  | 0.000306  |
| C             | -2.598631      | -0.000106 | 0.000071  |
| H             | -3.018705      | -0.104766 | 1.009591  |
| H             | -3.015031      | 0.927846  | -0.415527 |
| H             | -3.015119      | -0.823007 | -0.596976 |
| Cl            | 1.808614       | -0.000041 | -0.000070 |

| <b>Me<sub>2</sub>Mg</b> |                |           |           |
|-------------------------|----------------|-----------|-----------|
| Atom                    | Coordinate (Å) |           |           |
|                         | x              | y         | z         |
| Mg                      | -0.508816      | 0.000105  | 0.000306  |
| C                       | -2.598631      | -0.000106 | 0.000071  |
| H                       | -3.018705      | -0.104766 | 1.009591  |
| H                       | -3.015031      | 0.927846  | -0.415527 |
| H                       | -3.015119      | -0.823007 | -0.596976 |
| C                       | 1.621184       | -0.000029 | -0.000040 |
| H                       | 1.977998       | 0.816933  | 0.591701  |
| H                       | 1.977859       | -0.921057 | 0.411532  |
| H                       | 1.977695       | 0.103969  | -1.003526 |

| <b>MgCl<sub>2</sub></b> |                |           |           |
|-------------------------|----------------|-----------|-----------|
| Atom                    | Coordinate (Å) |           |           |
|                         | x              | y         | z         |
| Mg                      | -0.508816      | 0.000105  | 0.000306  |
| Cl                      | -2.858816      | -0.000132 | 0.000042  |
| Cl                      | 1.841184       | -0.000043 | -0.000075 |

| <b>MeMgCl...THF</b> |                |           |           |
|---------------------|----------------|-----------|-----------|
| Atom                | Coordinate (Å) |           |           |
|                     | x              | y         | z         |
| Mg                  | 1.388245       | 0.592410  | 0.022931  |
| C                   | 1.512155       | 2.691890  | 0.017725  |
| H                   | 0.951200       | 3.113284  | -0.830509 |
| H                   | 1.074457       | 3.139086  | 0.922650  |
| H                   | 2.532323       | 3.091915  | -0.059481 |
| Cl                  | 2.476703       | -1.464665 | 0.037275  |
| O                   | -0.601303      | 0.052606  | -0.175321 |
| C                   | -1.658411      | 1.041381  | -0.201602 |
| C                   | -1.161438      | -1.273178 | 0.001085  |
| C                   | -2.860363      | 0.329390  | 0.379028  |
| H                   | -1.322097      | 1.912949  | 0.368354  |
| H                   | -1.825548      | 1.342838  | -1.244394 |
| C                   | -2.659319      | -1.088936 | -0.142354 |
| H                   | -0.713011      | -1.936411 | -0.744002 |
| H                   | -0.884686      | -1.630208 | 1.001235  |
| H                   | -3.803598      | 0.781895  | 0.062234  |
| H                   | -2.821008      | 0.346261  | 1.475246  |

|   |           |           |           |
|---|-----------|-----------|-----------|
| H | -2.955495 | -1.152445 | -1.196420 |
| H | -3.220751 | -1.842893 | 0.415524  |

| <b>Me<sub>2</sub>Mg...THF</b> |                |           |           |
|-------------------------------|----------------|-----------|-----------|
| Atom                          | Coordinate (Å) |           |           |
|                               | x              | y         | z         |
| Mg                            | -1.766417      | -0.002189 | 0.017945  |
| C                             | -2.272801      | -2.069903 | 0.003313  |
| H                             | -1.793948      | -2.599387 | -0.836297 |
| H                             | -1.935882      | -2.595020 | 0.911402  |
| H                             | -3.348667      | -2.282650 | -0.082571 |
| O                             | 0.334268       | 0.008886  | -0.094259 |
| C                             | 1.160267       | -1.173752 | -0.159004 |
| C                             | 1.155640       | 1.185043  | 0.071266  |
| C                             | 2.527272       | -0.719918 | 0.310783  |
| H                             | 0.698213       | -1.947787 | 0.461556  |
| H                             | 1.182642       | -1.525714 | -1.199564 |
| C                             | 2.570522       | 0.715503  | -0.201134 |
| H                             | 0.793375       | 1.956638  | -0.615090 |
| H                             | 1.038376       | 1.549650  | 1.101099  |
| H                             | 3.331294       | -1.348943 | -0.080410 |
| H                             | 2.580199       | -0.736857 | 1.406500  |
| H                             | 2.778447       | 0.730354  | -1.278157 |
| H                             | 3.317385       | 1.337037  | 0.299906  |
| C                             | -2.298561      | 2.059213  | 0.033305  |
| H                             | -3.376669      | 2.258639  | 0.122341  |
| H                             | -1.822280      | 2.607740  | 0.861685  |
| H                             | -1.973655      | 2.574362  | -0.884855 |

| <b>MgCl<sub>2</sub>...THF</b> |                |           |           |
|-------------------------------|----------------|-----------|-----------|
| Atom                          | Coordinate (Å) |           |           |
|                               | x              | y         | z         |
| Mg                            | -1.268708      | -0.000031 | 0.019818  |
| Cl                            | -1.905109      | 2.205064  | 0.016627  |
| O                             | 0.758941       | 0.005353  | -0.099051 |
| C                             | 1.594111       | -1.179944 | -0.185636 |
| C                             | 1.585747       | 1.190687  | 0.062877  |
| C                             | 2.944875       | -0.726794 | 0.321320  |
| H                             | 1.120553       | -1.969852 | 0.403859  |
| H                             | 1.632823       | -1.493979 | -1.236484 |
| C                             | 3.001055       | 0.710940  | -0.182028 |
| H                             | 1.232807       | 1.949967  | -0.640450 |
| H                             | 1.446600       | 1.562541  | 1.085798  |
| H                             | 3.757602       | -1.352738 | -0.055743 |
| H                             | 2.969892       | -0.752619 | 1.417601  |
| H                             | 3.233808       | 0.731687  | -1.253469 |
| H                             | 3.737331       | 1.327479  | 0.339792  |
| Cl                            | -1.902725      | -2.205903 | 0.006578  |

| <b>PhCN...MgCl<sub>2</sub></b> |                |           |           |
|--------------------------------|----------------|-----------|-----------|
| Atom                           | Coordinate (Å) |           |           |
|                                | x              | y         | z         |
| C                              | -3.057270      | -0.517845 | -0.657811 |
| C                              | -2.596832      | 0.653400  | -0.039202 |
| C                              | -3.480846      | 1.562159  | 0.557035  |
| C                              | -4.839072      | 1.289559  | 0.528005  |
| C                              | -5.304591      | 0.129282  | -0.087414 |
| C                              | -4.419720      | -0.771145 | -0.677118 |
| H                              | -2.345418      | -1.203506 | -1.113047 |
| H                              | -3.098552      | 2.461969  | 1.029810  |
| H                              | -5.537812      | 1.983721  | 0.984957  |
| H                              | -6.371536      | -0.075380 | -0.108127 |
| H                              | -4.793920      | -1.671559 | -1.154639 |

|    |           |           |           |
|----|-----------|-----------|-----------|
| C  | -1.201860 | 0.909785  | -0.032188 |
| N  | -0.056945 | 1.089006  | -0.045188 |
| Mg | 2.063538  | 1.208762  | -0.155214 |
| Cl | 2.661448  | 3.420487  | -0.117419 |
| Cl | 3.449390  | -0.626765 | -0.462643 |

### PnCN...MgCl<sub>2</sub>...THF1

| Atom | Coordinate (Å) |           |           |
|------|----------------|-----------|-----------|
|      | x              | y         | z         |
| C    | 3.833659       | -0.391083 | 1.147475  |
| C    | 5.187283       | -0.674656 | 1.055510  |
| C    | 5.848403       | -0.535473 | -0.162958 |
| C    | 5.163926       | -0.112442 | -1.300114 |
| C    | 3.809692       | 0.174578  | -1.227801 |
| C    | 3.149485       | 0.032539  | 0.000252  |
| H    | 3.302395       | -0.492696 | 2.089337  |
| H    | 5.729361       | -1.004998 | 1.936484  |
| H    | 6.909843       | -0.759106 | -0.226839 |
| H    | 5.687697       | -0.005747 | -2.245316 |
| H    | 3.260129       | 0.507286  | -2.103414 |
| C    | 1.760731       | 0.325935  | 0.080952  |
| N    | 0.628016       | 0.562502  | 0.143258  |
| Mg   | -1.449432      | 1.053636  | 0.290067  |
| O    | -2.121704      | -0.656441 | -0.632578 |
| C    | -1.707493      | -1.963242 | -0.153850 |
| C    | -3.501725      | -0.709328 | -1.078077 |
| C    | -2.829346      | -2.902226 | -0.549370 |
| H    | -0.740540      | -2.198342 | -0.609077 |
| H    | -1.590941      | -1.903776 | 0.937519  |
| C    | -4.046256      | -1.987331 | -0.481130 |
| H    | -4.010721      | 0.199559  | -0.739862 |
| H    | -3.504849      | -0.726146 | -2.175278 |
| H    | -2.895488      | -3.765015 | 0.118392  |
| H    | -2.682828      | -3.269194 | -1.572322 |
| H    | -4.344139      | -1.821121 | 0.561873  |
| H    | -4.910175      | -2.367284 | -1.032593 |
| Cl   | -2.157648      | 0.714918  | 2.473058  |
| Cl   | -1.974657      | 2.739984  | -1.199364 |

### PnCN...MgCl<sub>2</sub>...THF2a

| Atom | Coordinate (Å) |           |           |
|------|----------------|-----------|-----------|
|      | x              | y         | z         |
| C    | 4.111154       | -0.000047 | 1.354595  |
| C    | 5.496564       | 0.000016  | 1.299258  |
| C    | 6.146274       | 0.000183  | 0.067140  |
| C    | 5.417903       | 0.000289  | -1.120263 |
| C    | 4.032176       | 0.000229  | -1.084134 |
| C    | 3.383413       | 0.000061  | 0.157535  |
| H    | 3.588663       | -0.000174 | 2.306832  |
| H    | 6.071970       | -0.000065 | 2.220181  |
| H    | 7.232365       | 0.000232  | 0.032035  |
| H    | 5.932035       | 0.000420  | -2.076748 |
| H    | 3.448882       | 0.000310  | -2.000486 |
| C    | 1.960338       | 0.000008  | 0.196823  |
| N    | 0.801584       | -0.000030 | 0.218445  |
| Mg   | -1.388653      | -0.000006 | 0.305684  |
| Cl   | -2.441625      | -0.000031 | -1.826085 |
| O    | -1.163061      | 2.111714  | 0.252903  |
| C    | -2.301867      | 2.932528  | 0.605990  |
| C    | -0.426986      | 2.737681  | -0.823232 |
| C    | -2.007567      | 4.286419  | -0.001243 |
| H    | -3.205099      | 2.483061  | 0.166455  |
| H    | -2.396730      | 2.920356  | 1.694684  |
| C    | -1.293342      | 3.891282  | -1.287555 |
| H    | 0.536554       | 3.078733  | -0.421071 |
| H    | -0.247480      | 1.989446  | -1.603191 |

|    |           |           |           |
|----|-----------|-----------|-----------|
| H  | -1.338892 | 4.863011  | 0.650253  |
| H  | -2.915733 | 4.872250  | -0.166864 |
| H  | -0.706114 | 4.698665  | -1.733512 |
| H  | -2.019296 | 3.539253  | -2.031293 |
| O  | -1.162974 | -2.111740 | 0.252845  |
| C  | -0.426682 | -2.737684 | -0.823154 |
| C  | -2.301731 | -2.932661 | 0.605823  |
| C  | -1.292889 | -3.891351 | -1.287587 |
| H  | -0.247083 | -1.989460 | -1.603101 |
| H  | 0.536812  | -3.078672 | -0.420829 |
| C  | -2.007244 | -4.286535 | -0.001362 |
| H  | -2.396717 | -2.920492 | 1.694506  |
| H  | -3.204964 | -2.483297 | 0.166188  |
| H  | -0.705540 | -4.698691 | -1.733466 |
| H  | -2.018777 | -3.539386 | -2.031420 |
| H  | -1.338606 | -4.863070 | 0.650222  |
| H  | -2.915343 | -4.872439 | -0.167092 |
| Cl | -2.438785 | -0.000087 | 2.415063  |

### PnCN...MgCl<sub>2</sub>...THF2b

| Atom | Coordinate (Å) |           |           |
|------|----------------|-----------|-----------|
|      | x              | y         | z         |
| C    | -4.282995      | 0.459506  | 0.955952  |
| C    | -5.661876      | 0.604607  | 0.948602  |
| C    | -6.447022      | -0.242325 | 0.169701  |
| C    | -5.861180      | -1.239455 | -0.606685 |
| C    | -4.483565      | -1.398136 | -0.610973 |
| C    | -3.698454      | -0.544669 | 0.173459  |
| H    | -3.653072      | 1.108608  | 1.559187  |
| H    | -6.126199      | 1.378836  | 1.552216  |
| H    | -7.527296      | -0.124228 | 0.168108  |
| H    | -6.480652      | -1.895767 | -1.210774 |
| H    | -4.010254      | -2.170176 | -1.210690 |
| C    | -2.280757      | -0.684618 | 0.1707037 |
| N    | -1.125194      | -0.775477 | 0.186599  |
| Mg   | 1.114035       | -0.734981 | 0.080466  |
| O    | 0.718775       | 1.290958  | -0.307862 |
| C    | 0.530897       | 1.739230  | -1.669244 |
| C    | 0.030849       | 2.172305  | 0.606908  |
| C    | -0.024969      | 3.141822  | -1.542265 |
| H    | 1.496355       | 1.670086  | -2.181781 |
| H    | -0.184438      | 1.062977  | -2.161177 |
| C    | -0.859788      | 3.025784  | -0.271899 |
| H    | -0.508812      | 1.560456  | 1.338058  |
| H    | 0.785685       | 2.770822  | 1.135535  |
| H    | -0.602620      | 3.440137  | -2.420823 |
| H    | 0.787706       | 3.865131  | -1.401345 |
| H    | -1.801945      | 2.501661  | -0.483350 |
| H    | -1.098450      | 3.988691  | 0.187077  |
| O    | 3.114741       | -0.149227 | -0.308198 |
| C    | 3.663687       | 0.995458  | 0.384267  |
| C    | 4.136383       | -1.159807 | -0.470912 |
| C    | 5.029505       | 0.552219  | 0.868035  |
| H    | 3.723441       | 1.828947  | -0.329607 |
| H    | 2.983883       | 1.268541  | 1.198200  |
| C    | 5.441421       | -0.438292 | -0.213501 |
| H    | 3.964293       | -1.954567 | 0.270491  |
| H    | 4.029444       | -1.585710 | -1.471936 |
| H    | 4.933723       | 0.039060  | 1.833735  |
| H    | 5.721687       | 1.389918  | 0.989129  |
| H    | 6.238076       | -1.120112 | 0.096082  |
| H    | 5.772228       | 0.091567  | -1.115720 |
| Cl   | 1.125503       | -2.346454 | -1.642935 |
| Cl   | 1.462981       | -0.941922 | 2.403241  |

### RC\_MeMgCl

| Atom | Coordinate (Å) |           |           |
|------|----------------|-----------|-----------|
|      | x              | y         | z         |
| C    | 2.568195       | 1.184515  | -0.305667 |
| C    | 3.948786       | 1.079239  | -0.370213 |
| C    | 4.570015       | -0.133272 | -0.079532 |
| C    | 3.818007       | -1.250242 | 0.277471  |
| C    | 2.436186       | -1.163831 | 0.346081  |
| C    | 1.816250       | 0.058055  | 0.053320  |
| H    | 2.067067       | 2.121887  | -0.529288 |
| H    | 4.542772       | 1.944716  | -0.648238 |
| H    | 5.652767       | -0.208629 | -0.132164 |
| H    | 4.310712       | -2.191475 | 0.502160  |
| H    | 1.833852       | -2.024725 | 0.621278  |
| C    | 0.398570       | 0.156924  | 0.118046  |
| N    | -0.756766      | 0.238314  | 0.168812  |
| Mg   | -2.931697      | 0.447400  | 0.150119  |
| Cl   | -3.653975      | -1.724889 | -0.278333 |
| C    | -3.636950      | 2.428806  | 0.187639  |
| H    | -3.170075      | 3.031184  | 0.980217  |
| H    | -3.434197      | 2.954817  | -0.756399 |
| H    | -4.721958      | 2.497170  | 0.348102  |

### TS\_MeMgCl

| Atom | Coordinate (Å) |           |           |
|------|----------------|-----------|-----------|
|      | x              | y         | z         |
| C    | -2.141510      | 1.027358  | -0.504050 |
| C    | -3.510645      | 1.058482  | -0.275112 |
| C    | -4.158233      | -0.052301 | 0.259959  |
| C    | -3.437617      | -1.205762 | 0.553449  |
| C    | -2.069948      | -1.249863 | 0.314690  |
| C    | -1.417350      | -0.128767 | -0.207618 |
| H    | -1.636465      | 1.892010  | -0.925630 |
| H    | -4.075677      | 1.955445  | -0.514181 |
| H    | -5.228678      | -0.018939 | 0.445765  |
| H    | -3.941005      | -2.075844 | 0.966575  |
| H    | -1.495635      | -2.147940 | 0.528971  |
| C    | 0.013219       | -0.269720 | -0.476777 |
| N    | 0.813288       | -0.994637 | -1.008799 |
| Mg   | 2.313182       | 0.167414  | -0.200798 |
| Cl   | 4.533044       | -0.213410 | 0.225649  |
| C    | 0.706947       | 1.433497  | 0.710112  |
| H    | 0.253532       | 2.263440  | 0.161022  |
| H    | 0.070472       | 1.183195  | 1.562515  |
| H    | 1.631337       | 1.852552  | 1.162186  |

### PR\_MeMgCl

| Atom | Coordinate (Å) |           |           |
|------|----------------|-----------|-----------|
|      | x              | y         | z         |
| C    | -1.785113      | -1.192965 | 0.045043  |
| C    | -3.049637      | -1.761450 | 0.014305  |
| C    | -4.179794      | -0.947403 | -0.047648 |
| C    | -4.027237      | 0.433969  | -0.076930 |
| C    | -2.754722      | 0.999381  | -0.044556 |
| C    | -1.612077      | 0.194748  | 0.016327  |
| H    | -0.888300      | -1.807051 | 0.091857  |
| H    | -3.159659      | -2.843773 | 0.038011  |
| H    | -5.173330      | -1.389291 | -0.073121 |
| H    | -4.902394      | 1.078309  | -0.125837 |
| H    | -2.661346      | 2.082730  | -0.068827 |
| C    | -0.210403      | 0.757228  | 0.046356  |
| N    | 0.797501       | -0.000924 | 0.084251  |
| Mg   | 2.723559       | -0.196893 | 0.087792  |
| Cl   | 5.019949       | -0.429610 | -0.083485 |
| C    | -0.129978      | 2.274986  | 0.023908  |
| H    | -0.591306      | 2.692638  | -0.880905 |
| H    | -0.652405      | 2.723320  | 0.879424  |

|   |          |          |          |
|---|----------|----------|----------|
| H | 0.918164 | 2.584701 | 0.054547 |
|---|----------|----------|----------|

### RCa\_MeMgCl<sub>THF</sub>1

| Atom | Coordinate (Å) |           |           |
|------|----------------|-----------|-----------|
|      | x              | y         | z         |
| C    | -2.858058      | 0.504520  | -0.755104 |
| C    | -4.215333      | 0.776301  | -0.831355 |
| C    | -5.129764      | -0.058723 | -0.193248 |
| C    | -4.696194      | -1.170569 | 0.525150  |
| C    | -3.342384      | -1.456848 | 0.612588  |
| C    | -2.426841      | -0.614614 | -0.030195 |
| H    | -2.130405      | 1.143062  | -1.250875 |
| H    | -4.561863      | 1.640265  | -1.390504 |
| H    | -6.192381      | 0.159426  | -0.256878 |
| H    | -5.416160      | -1.816224 | 1.019112  |
| H    | -2.987177      | -2.319211 | 1.169146  |
| C    | -1.031790      | -0.885625 | 0.055059  |
| N    | 0.109351       | -1.082722 | 0.118578  |
| Mg   | 2.318875       | -1.080482 | 0.327782  |
| Cl   | 3.083252       | -1.582193 | -1.827489 |
| C    | 2.870543       | -1.596339 | 2.300878  |
| H    | 2.000594       | -1.631640 | 2.976172  |
| H    | 3.374475       | -2.567752 | 2.407698  |
| H    | 3.555745       | -0.851643 | 2.736076  |
| O    | 2.131292       | 1.006226  | 0.236076  |
| C    | 1.630341       | 1.688326  | 1.408151  |
| C    | 1.710066       | 1.703083  | -0.960073 |
| C    | 0.536479       | 2.595956  | 0.888809  |
| H    | 1.292242       | 0.932092  | 2.125458  |
| H    | 2.455133       | 2.255936  | 1.858841  |
| C    | 1.094549       | 3.000192  | -0.470900 |
| H    | 2.582360       | 1.830797  | -1.607336 |
| H    | 0.975201       | 1.074706  | -1.483524 |
| H    | 0.344479       | 3.441915  | 1.553934  |
| H    | -0.400188      | 2.034047  | 0.770237  |
| H    | 1.864994       | 3.771429  | -0.350811 |
| H    | 0.335689       | 3.381148  | -1.160032 |

### TSa\_MeMgCl<sub>THF</sub>1

| Atom | Coordinate (Å) |           |           |
|------|----------------|-----------|-----------|
|      | x              | y         | z         |
| C    | -2.675626      | 1.057638  | -0.488088 |
| C    | -4.004219      | 1.409583  | -0.283908 |
| C    | -4.934556      | 0.437753  | 0.071031  |
| C    | -4.536972      | -0.888742 | 0.221489  |
| C    | -3.208977      | -1.246506 | 0.032242  |
| C    | -2.275633      | -0.271867 | -0.324483 |
| H    | -1.938601      | 1.804169  | -0.778563 |
| H    | -4.313431      | 2.444287  | -0.406340 |
| H    | -5.974119      | 0.713396  | 0.228672  |
| H    | -5.265954      | -1.648723 | 0.489958  |
| H    | -2.894276      | -2.280350 | 0.147761  |
| C    | -0.871915      | -0.580647 | -0.590241 |
| N    | -0.004160      | -0.479527 | -1.415870 |
| Mg   | 1.330334       | -1.172853 | 0.022092  |
| Cl   | 3.097463       | -2.622696 | -0.258315 |
| C    | -0.398125      | -1.327617 | 1.425894  |
| H    | -0.918520      | -0.519009 | 1.947843  |
| H    | -1.030871      | -2.219971 | 1.448628  |
| H    | 0.476508       | -1.571370 | 2.066972  |
| O    | 2.146731       | 0.648606  | 0.543392  |
| C    | 1.291563       | 1.730655  | 0.987091  |
| C    | 3.231331       | 1.187126  | -0.264836 |
| C    | 1.573777       | 2.852155  | 0.015742  |
| H    | 0.257279       | 1.370074  | 0.981781  |
| H    | 1.571386       | 1.993778  | 2.015453  |

|   |          |          |           |
|---|----------|----------|-----------|
| C | 3.075346 | 2.694285 | -0.193422 |
| H | 4.174974 | 0.806557 | 0.135801  |
| H | 3.107073 | 0.818995 | -1.292764 |
| H | 1.286428 | 3.830854 | 0.408402  |
| H | 1.031765 | 2.677278 | -0.923567 |
| H | 3.622904 | 3.099682 | 0.665836  |
| H | 3.445882 | 3.185375 | -1.096730 |

**PRa\_MeMgCl<sub>THF</sub>1**

| Atom | Coordinate (Å) |           |           |
|------|----------------|-----------|-----------|
|      | x              | y         | z         |
| C    | -3.109425      | -0.436880 | -1.128372 |
| C    | -4.405626      | -0.226698 | -1.574521 |
| C    | -5.366201      | 0.295751  | -0.709313 |
| C    | -5.013065      | 0.601948  | 0.599717  |
| C    | -3.709355      | 0.389824  | 1.041881  |
| C    | -2.734929      | -0.132251 | 0.184606  |
| H    | -2.341710      | -0.845474 | -1.782147 |
| H    | -4.673598      | -0.470697 | -2.600614 |
| H    | -6.384032      | 0.461649  | -1.055193 |
| H    | -5.754934      | 1.008591  | 1.283749  |
| H    | -3.458210      | 0.636898  | 2.070884  |
| C    | -1.306525      | -0.378748 | 0.611993  |
| N    | -0.452570      | -0.849316 | -0.192080 |
| Mg   | 1.462436       | -1.262709 | -0.214088 |
| Cl   | 3.170070       | -2.800489 | 0.050250  |
| C    | -1.003102      | -0.006011 | 2.056723  |
| H    | -1.201713      | 1.057127  | 2.251705  |
| H    | -1.617268      | -0.575946 | 2.766681  |
| H    | 0.051451       | -0.205818 | 2.276914  |
| O    | 2.401072       | 0.550412  | -0.244347 |
| C    | 1.678924       | 1.797416  | -0.082422 |
| C    | 3.823937       | 0.803782  | -0.359390 |
| C    | 2.683890       | 2.869859  | -0.443920 |
| H    | 0.792164       | 1.761380  | -0.721744 |
| H    | 1.356616       | 1.874063  | 0.964921  |
| C    | 3.989952       | 2.253557  | 0.044912  |
| H    | 4.348563       | 0.086884  | 0.278759  |
| H    | 4.118227       | 0.632049  | -1.402801 |
| H    | 2.450383       | 3.828277  | 0.026800  |
| H    | 2.712695       | 3.018151  | -1.530391 |
| H    | 4.069551       | 2.340603  | 1.135410  |
| H    | 4.879957       | 2.705715  | -0.400144 |

**RCb\_MeMgCl<sub>THF</sub>1**

| Atom | Coordinate (Å) |           |           |
|------|----------------|-----------|-----------|
|      | x              | y         | z         |
| C    | -3.613708      | 0.037174  | 1.131230  |
| C    | -4.960028      | 0.353968  | 1.225754  |
| C    | -5.707840      | 0.572267  | 0.071030  |
| C    | -5.117391      | 0.476207  | -1.187001 |
| C    | -3.772347      | 0.160112  | -1.300550 |
| C    | -3.024626      | -0.058654 | -0.136421 |
| H    | -3.015404      | -0.137570 | 2.020796  |
| H    | -5.428041      | 0.430206  | 2.202681  |
| H    | -6.762905      | 0.819422  | 0.152401  |
| H    | -5.708070      | 0.647383  | -2.082001 |
| H    | -3.296506      | 0.079721  | -2.273591 |
| C    | -1.643588      | -0.387523 | -0.237432 |
| N    | -0.517975      | -0.655511 | -0.309129 |
| Mg   | 1.563339       | -1.318567 | -0.277723 |
| C    | 2.288710       | -2.577765 | -1.809825 |
| H    | 1.658761       | -3.449021 | -2.041279 |
| H    | 2.405794       | -2.026792 | -2.756890 |
| H    | 3.285542       | -2.982500 | -1.575651 |
| O    | 2.266996       | 0.613307  | -0.668714 |

|    |          |           |           |
|----|----------|-----------|-----------|
| C  | 1.873740 | 1.733875  | 0.164070  |
| C  | 3.672631 | 0.720117  | -0.994447 |
| C  | 3.090465 | 2.639182  | 0.226693  |
| H  | 0.991515 | 2.200928  | -0.285203 |
| H  | 1.609630 | 1.336047  | 1.153518  |
| C  | 4.235705 | 1.647335  | 0.058584  |
| H  | 4.100915 | -0.288855 | -0.993599 |
| H  | 3.766015 | 1.140211  | -2.005103 |
| H  | 3.134127 | 3.202803  | 1.162339  |
| H  | 3.083739 | 3.355599  | -0.604005 |
| H  | 4.406038 | 1.095466  | 0.991841  |
| H  | 5.176339 | 2.111302  | -0.249672 |
| Cl | 1.964233 | -1.407481 | 2.044682  |

**TSb\_MeMgCl<sub>THF</sub>1**

| Atom | Coordinate (Å) |           |           |
|------|----------------|-----------|-----------|
|      | x              | y         | z         |
| C    | -3.632532      | 0.862407  | -0.655930 |
| C    | -4.974165      | 0.571802  | -0.441651 |
| C    | -5.339733      | -0.632921 | 0.150764  |
| C    | -4.362428      | -1.550212 | 0.529357  |
| C    | -3.018924      | -1.261820 | 0.330995  |
| C    | -2.651922      | -0.052992 | -0.263417 |
| H    | -3.333159      | 1.795671  | -1.126935 |
| H    | -5.735276      | 1.287294  | -0.741651 |
| H    | -6.389835      | -0.859820 | 0.316248  |
| H    | -4.648804      | -2.495025 | 0.983703  |
| H    | -2.252970      | -1.975457 | 0.623159  |
| C    | -1.261811      | 0.287289  | -0.556986 |
| N    | -0.508780      | 0.599504  | -1.440063 |
| Mg   | 0.929302       | 0.931690  | 0.012473  |
| C    | -0.551502      | 0.269504  | 1.541562  |
| H    | -1.401367      | 0.837515  | 1.929559  |
| H    | -0.706668      | -0.792037 | 1.759620  |
| H    | 0.316125       | 0.576776  | 2.165288  |
| O    | 2.110480       | -0.736501 | -0.138729 |
| C    | 2.855711       | -1.218149 | 1.011032  |
| C    | 2.876961       | -0.956624 | -1.350498 |
| C    | 4.020659       | -1.990622 | 0.428032  |
| H    | 3.195245       | -0.344623 | 1.585851  |
| H    | 2.175606       | -1.814193 | 1.627064  |
| C    | 4.283478       | -1.231748 | -0.867776 |
| H    | 2.441612       | -1.813890 | -1.878817 |
| H    | 2.784404       | -0.065764 | -1.980856 |
| H    | 3.727972       | -3.025619 | 0.213690  |
| H    | 4.879107       | -2.009872 | 1.104093  |
| H    | 4.870210       | -1.797820 | -1.595643 |
| H    | 4.801710       | -0.287023 | -0.660099 |
| Cl   | 2.431726       | 2.630799  | 0.446084  |

**PRb\_MeMgCl<sub>THF</sub>1**

| Atom | Coordinate (Å) |           |           |
|------|----------------|-----------|-----------|
|      | x              | y         | z         |
| C    | -3.029058      | -1.218837 | -0.404288 |
| C    | -4.195371      | -1.964671 | -0.488233 |
| C    | -5.415533      | -1.397695 | -0.122265 |
| C    | -5.451482      | -0.081939 | 0.324551  |
| C    | -4.277727      | 0.663333  | 0.403094  |
| C    | -3.046132      | 0.107283  | 0.040598  |
| H    | -2.064549      | -1.639686 | -0.680438 |
| H    | -4.158182      | -2.993845 | -0.839847 |
| H    | -6.332093      | -1.979949 | -0.185684 |
| H    | -6.397704      | 0.370316  | 0.613972  |
| H    | -4.332220      | 1.690845  | 0.755185  |
| C    | -1.745505      | 0.872529  | 0.116839  |
| N    | -0.642934      | 0.321818  | -0.166134 |

|    |           |           |           |
|----|-----------|-----------|-----------|
| Mg | 1.258283  | 0.781641  | -0.192163 |
| C  | -1.890797 | 2.321599  | 0.559325  |
| H  | -2.571189 | 2.882306  | -0.095159 |
| H  | -2.299794 | 2.395715  | 1.576098  |
| H  | -0.914739 | 2.816482  | 0.543775  |
| O  | 2.518063  | -0.764722 | 0.360281  |
| C  | 2.872398  | -1.772208 | -0.623031 |
| C  | 3.643628  | -0.526650 | 1.246981  |
| C  | 4.194939  | -2.338900 | -0.150628 |
| H  | 2.056386  | -2.498858 | -0.671990 |
| H  | 2.974524  | -1.279547 | -1.600919 |
| C  | 4.828741  | -1.130988 | 0.528766  |
| H  | 3.724617  | 0.553094  | 1.409870  |
| H  | 3.436053  | -1.028411 | 2.200270  |
| H  | 4.788265  | -2.737161 | -0.977584 |
| H  | 4.030680  | -3.144794 | 0.574706  |
| H  | 5.214088  | -0.426489 | -0.219636 |
| H  | 5.641517  | -1.389896 | 1.212039  |
| Cl | 2.796022  | 2.452829  | -0.683427 |

#### RCa\_MeMgCl<sub>THF</sub><sub>2</sub>

| Atom | Coordinate (Å) |           |           |
|------|----------------|-----------|-----------|
|      | x              | y         | z         |
| C    | -4.065909      | -0.001707 | 1.292978  |
| C    | -5.448275      | -0.001826 | 1.185207  |
| C    | -6.050403      | -0.004921 | -0.070855 |
| C    | -5.276268      | -0.007922 | -1.228827 |
| C    | -3.892565      | -0.007837 | -1.139165 |
| C    | -3.291612      | -0.004713 | 0.125897  |
| H    | -3.580359      | 0.000658  | 2.264684  |
| H    | -6.058572      | 0.000501  | 2.083481  |
| H    | -7.134349      | -0.005004 | -0.148094 |
| H    | -5.752885      | -0.010343 | -2.204658 |
| H    | -3.274376      | -0.010134 | -2.032381 |
| C    | -1.870219      | -0.004613 | 0.228243  |
| N    | -0.713970      | -0.004389 | 0.312790  |
| Mg   | 1.506834       | -0.002227 | 0.610191  |
| Cl   | 2.615868       | -0.005063 | -1.539339 |
| C    | 2.331563       | 0.042744  | 2.574146  |
| H    | 2.208665       | -0.888673 | 3.150266  |
| H    | 3.416100       | 0.245820  | 2.574280  |
| H    | 1.891185       | 0.837871  | 3.199139  |
| O    | 1.228890       | -2.158156 | 0.429245  |
| C    | 2.368322       | -2.954305 | 0.813726  |
| C    | 0.589530       | -2.747623 | -0.721839 |
| C    | 2.167915       | -4.286722 | 0.123267  |
| H    | 3.283928       | -2.455325 | 0.460123  |
| H    | 2.394569       | -3.004228 | 1.906218  |
| C    | 1.520704       | -3.851230 | -1.185535 |
| H    | -0.388507      | -3.137609 | -0.406745 |
| H    | 0.439096       | -1.964879 | -1.473598 |
| H    | 1.481679       | -4.919027 | 0.700969  |
| H    | 3.106406       | -4.831712 | -0.011031 |
| H    | 0.990938       | -4.654414 | -1.705399 |
| H    | 2.279018       | -3.439932 | -1.863710 |
| O    | 1.221235       | 2.152988  | 0.413211  |
| C    | 0.583032       | 2.740346  | -0.739352 |
| C    | 2.359447       | 2.950067  | 0.797884  |
| C    | 1.504212       | 3.857403  | -1.192011 |
| H    | 0.446360       | 1.959775  | -1.496173 |
| H    | -0.401461      | 3.117279  | -0.428659 |
| C    | 2.147150       | 4.287327  | 0.120957  |
| H    | 2.393240       | 2.987121  | 1.890814  |
| H    | 3.275179       | 2.459996  | 0.432165  |
| H    | 0.967086       | 4.660141  | -1.704973 |
| H    | 2.266921       | 3.460268  | -1.873791 |

|   |          |          |           |
|---|----------|----------|-----------|
| H | 1.454937 | 4.907601 | 0.704556  |
| H | 3.080477 | 4.842295 | -0.008507 |

#### TSa\_MeMgCl<sub>THF</sub><sub>2</sub>

| Atom | Coordinate (Å) |           |           |
|------|----------------|-----------|-----------|
|      | x              | y         | z         |
| C    | 3.516553       | 0.210752  | -0.017424 |
| C    | 4.858766       | -0.047643 | 0.226657  |
| C    | 5.339283       | -1.354150 | 0.172164  |
| C    | 4.476389       | -2.403369 | -0.129351 |
| C    | 3.132112       | -2.151818 | -0.380682 |
| C    | 2.654144       | -0.842450 | -0.328838 |
| H    | 3.122154       | 1.224969  | 0.029597  |
| H    | 5.532788       | 0.772086  | 0.461860  |
| H    | 6.389933       | -1.554058 | 0.366864  |
| H    | 4.851105       | -3.422880 | -0.171133 |
| H    | 2.449224       | -2.963613 | -0.621057 |
| C    | 1.254813       | -0.561724 | -0.639603 |
| N    | 0.459867       | -0.390030 | -1.521118 |
| Mg   | -0.911955      | 0.176423  | -0.023589 |
| Cl   | -3.102762      | 1.104908  | -0.005895 |
| C    | 0.643168       | -0.447500 | 1.483684  |
| H    | 1.441952       | 0.208567  | 1.844784  |
| H    | -0.241853      | -0.233640 | 2.126153  |
| H    | 0.917419       | -1.486428 | 1.700877  |
| C    | -1.743150      | -1.773553 | 0.028346  |
| O    | -2.465034      | -2.253484 | -1.129438 |
| C    | -2.366758      | -2.262568 | 1.234557  |
| C    | -3.734535      | -2.872684 | -0.580146 |
| H    | -2.649299      | -1.409519 | -1.803809 |
| H    | -1.830775      | -2.987608 | -1.643233 |
| C    | -3.273963      | -3.386109 | 0.778761  |
| H    | -1.574318      | -2.572517 | 1.923270  |
| H    | -2.940485      | -1.440700 | 1.689051  |
| H    | -4.132838      | -3.653793 | -1.233286 |
| H    | -4.503813      | -2.100945 | -0.452672 |
| H    | -2.704218      | -4.317003 | 0.666302  |
| H    | -4.093902      | -3.567442 | 1.478801  |
| O    | -0.097021      | 2.160832  | -0.027229 |
| C    | -0.123458      | 2.956957  | 1.173955  |
| C    | -0.286578      | 3.004918  | -1.183736 |
| C    | 0.017541       | 4.389782  | 0.702088  |
| H    | -1.086777      | 2.792401  | 1.680444  |
| H    | 0.687044       | 2.613887  | 1.825855  |
| C    | -0.721027      | 4.346769  | -0.630319 |
| H    | 0.669648       | 3.065341  | -1.721472 |
| H    | -1.033143      | 2.540010  | -1.837674 |
| H    | 1.074623       | 4.640227  | 0.547442  |
| H    | -0.403858      | 5.104894  | 1.413640  |
| H    | -0.470891      | 5.175050  | -1.298747 |
| H    | -1.805515      | 4.350115  | -0.463661 |

#### PRa\_MeMgCl<sub>THF</sub><sub>2</sub>

| Atom | Coordinate (Å) |           |           |
|------|----------------|-----------|-----------|
|      | x              | y         | z         |
| C    | -4.354924      | -0.396847 | -1.169946 |
| C    | -5.721992      | -0.264218 | -0.937768 |
| C    | -6.190536      | 0.009825  | 0.341961  |
| C    | -5.280760      | 0.152612  | 1.389087  |
| C    | -3.920512      | 0.023886  | 1.151059  |
| C    | -3.430515      | -0.253281 | -0.129733 |
| H    | -4.013092      | -0.612990 | -2.179775 |
| H    | -6.422706      | -0.376772 | -1.762560 |
| H    | -7.258075      | 0.111116  | 0.524712  |
| H    | -5.638548      | 0.364942  | 2.394714  |
| H    | -3.190109      | 0.133362  | 1.950293  |

|    |           |           |           |
|----|-----------|-----------|-----------|
| C  | -1.937156 | -0.380180 | -0.328768 |
| N  | -1.124795 | -0.165949 | 0.615402  |
| Mg | 0.826966  | -0.125670 | 0.888553  |
| Cl | 2.141044  | -0.355372 | 2.800857  |
| C  | -1.516474 | -0.772449 | -1.740708 |
| H  | -1.821679 | -0.017936 | -2.479675 |
| H  | -0.426787 | -0.872414 | -1.782934 |
| H  | -1.968090 | -1.722529 | -2.057269 |
| O  | 1.532947  | 1.617572  | 0.049734  |
| C  | 2.568582  | 2.503525  | 0.534475  |
| C  | 0.939814  | 2.146729  | -1.159285 |
| C  | 2.843930  | 3.434299  | -0.626922 |
| H  | 2.184022  | 3.038909  | 1.412209  |
| H  | 3.423049  | 1.893054  | 0.843026  |
| C  | 1.461683  | 3.565560  | -1.257019 |
| H  | 1.274665  | 1.527495  | -2.004552 |
| H  | -0.148049 | 2.061045  | -1.066889 |
| H  | 3.542735  | 2.966318  | -1.332625 |
| H  | 3.270220  | 4.387131  | -0.302811 |
| H  | 1.483042  | 3.928831  | -2.287650 |
| H  | 0.835514  | 4.244649  | -0.665747 |
| O  | 1.889229  | -1.264231 | -0.488307 |
| C  | 1.699509  | -2.700303 | -0.527932 |
| C  | 3.277366  | -0.943722 | -0.752031 |
| C  | 3.098554  | -3.277549 | -0.503502 |
| H  | 1.080721  | -2.993225 | 0.328386  |
| H  | 1.162819  | -2.948283 | -1.453267 |
| C  | 3.879699  | -2.226747 | -1.284056 |
| H  | 3.303840  | -0.099839 | -1.450122 |
| H  | 3.746462  | -0.643564 | 0.196312  |
| H  | 3.144487  | -4.277074 | -0.943297 |
| H  | 3.464595  | -3.334143 | 0.529536  |
| H  | 3.688850  | -2.326383 | -2.359667 |
| H  | 4.959324  | -2.274261 | -1.120239 |

#### RCb\_MeMgCl<sub>THF</sub>2

| Atom | Coordinate (Å) |           |           |
|------|----------------|-----------|-----------|
|      | x              | y         | z         |
| C    | -4.259856      | 0.571483  | 0.947021  |
| C    | -5.630652      | 0.769976  | 0.879289  |
| C    | -6.426949      | -0.111081 | -0.151502 |
| C    | -5.859241      | -1.195385 | -0.513275 |
| C    | -4.489754      | -1.407456 | -0.455628 |
| C    | -3.692757      | -0.520160 | 0.277235  |
| H    | -3.623543      | 1.247026  | 1.513321  |
| H    | -6.079912      | 1.612917  | 1.396224  |
| H    | -7.500756      | 0.048692  | 0.102320  |
| H    | -6.486530      | -1.878383 | -1.078604 |
| H    | -4.031274      | -2.247997 | -0.968647 |
| C    | -2.281844      | -0.718868 | 0.344508  |
| N    | -1.131983      | -0.861302 | 0.405455  |
| Mg   | 1.201880       | -0.852544 | 0.431781  |
| C    | 1.544504       | -0.900169 | 2.532873  |
| H    | 0.999550       | -1.678953 | 3.088693  |
| H    | 2.609389       | -1.042537 | 2.785330  |
| H    | 1.259191       | 0.053528  | 3.011168  |
| O    | 0.774185       | 1.108582  | -0.250098 |
| C    | 0.632606       | 1.395739  | -1.655017 |
| C    | 0.096408       | 2.105116  | 0.536535  |
| C    | 0.135287       | 2.825477  | -1.707732 |
| H    | 1.605099       | 1.228338  | -2.130384 |
| H    | -0.098741      | 0.694146  | -2.083703 |
| C    | -0.735550      | 2.890203  | -0.457914 |
| H    | -0.489672      | 1.597292  | 1.311204  |
| H    | 0.855793       | 2.734125  | 1.023823  |
| H    | -0.404863      | 3.046541  | -2.631944 |

|    |           |           |           |
|----|-----------|-----------|-----------|
| H  | 0.976377  | 3.525527  | -1.622909 |
| H  | -1.693638 | 2.383101  | -0.636461 |
| H  | -0.944414 | 3.907943  | -0.117749 |
| O  | 3.212783  | -0.187917 | -0.140390 |
| C  | 3.698722  | 0.994240  | 0.525097  |
| C  | 4.268594  | -1.160248 | -0.238847 |
| C  | 5.121960  | 0.673974  | 0.950062  |
| H  | 3.651671  | 1.830027  | -0.188175 |
| H  | 3.037850  | 1.218780  | 1.371335  |
| C  | 5.543922  | -0.359772 | -0.087356 |
| H  | 4.157832  | -1.894114 | 0.576032  |
| H  | 4.154627  | -1.680972 | -1.193568 |
| H  | 5.124144  | 0.223212  | 1.950951  |
| H  | 5.759893  | 1.561832  | 0.975640  |
| H  | 6.391926  | -0.974689 | 0.226533  |
| H  | 5.802879  | 0.127587  | -1.035864 |
| Cl | 1.210605  | -2.462767 | -1.335903 |

#### TSb\_MeMgCl<sub>THF</sub>2

| Atom | Coordinate (Å) |           |           |
|------|----------------|-----------|-----------|
|      | x              | y         | z         |
| C    | -4.050909      | -1.153371 | 0.113576  |
| C    | -5.410550      | -1.050540 | 0.375921  |
| C    | -6.054328      | 0.179518  | 0.260920  |
| C    | -5.338150      | 1.308692  | -0.124335 |
| C    | -3.978383      | 1.212062  | -0.397552 |
| C    | -3.334978      | -0.020794 | -0.278895 |
| H    | -3.533795      | -2.106947 | 0.202774  |
| H    | -5.970841      | -1.933450 | 0.672642  |
| H    | -7.117974      | 0.256997  | 0.471873  |
| H    | -5.839878      | 2.268707  | -0.215871 |
| H    | -3.409335      | 2.085863  | -0.707102 |
| C    | -1.917761      | -0.119315 | -0.618260 |
| N    | -1.124032      | -1.513959 | -1.517736 |
| Mg   | 0.336073       | -0.584974 | -0.077091 |
| C    | -1.247599      | -0.287467 | 1.487917  |
| H    | -1.882700      | -1.118435 | 1.810776  |
| H    | -0.322056      | -0.360940 | 2.104352  |
| H    | -1.717579      | 0.657981  | 1.782050  |
| O    | 0.755268       | 1.540993  | 0.018466  |
| C    | 1.353786       | 2.123219  | -1.157573 |
| C    | 1.337470       | 2.131447  | 1.198345  |
| C    | 2.641565       | 2.749447  | -0.670013 |
| H    | 1.483635       | 1.334055  | -1.907399 |
| H    | 0.663024       | 2.871647  | -1.569462 |
| C    | 2.217559       | 3.263633  | 0.700891  |
| H    | 0.526805       | 2.447513  | 1.862608  |
| H    | 1.937511       | 1.366359  | 1.712647  |
| H    | 3.011739       | 3.530760  | -1.338828 |
| H    | 3.417381       | 1.978390  | -0.563734 |
| H    | 1.636565       | 4.188135  | 0.597326  |
| H    | 3.055555       | 3.461150  | 1.374834  |
| O    | 2.500371       | -0.592126 | 0.031911  |
| C    | 3.292546       | -1.002714 | -1.100600 |
| C    | 3.172352       | -1.140385 | 1.178678  |
| C    | 4.743744       | -1.010771 | -0.604289 |
| H    | 2.954977       | -2.000411 | -1.413421 |
| H    | 3.098132       | -0.290798 | -1.909983 |
| C    | 4.621977       | -0.797661 | 0.913364  |
| H    | 2.741484       | -0.681546 | 2.075012  |
| H    | 2.994566       | -2.226097 | 1.211123  |
| H    | 5.340251       | -0.224022 | -1.074958 |
| H    | 5.219526       | -1.968103 | -0.836531 |
| H    | 4.802774       | 0.252205  | 1.175804  |
| H    | 5.313327       | -1.416730 | 1.490846  |
| Cl   | 0.417476       | -2.967990 | -0.207631 |



| <b>PRb_MeMgCl<sub>THF2</sub></b> |                |           |           |
|----------------------------------|----------------|-----------|-----------|
| Atom                             | Coordinate (Å) |           |           |
|                                  | x              | y         | z         |
| C                                | -4.492703      | -0.852743 | -0.108858 |
| C                                | -5.682004      | -0.261317 | 0.310595  |
| C                                | -5.730200      | 1.102809  | 0.572819  |
| C                                | -4.578195      | 1.872206  | 0.413102  |
| C                                | -3.395936      | 1.277001  | -0.001401 |
| C                                | -3.328135      | -0.094452 | -0.270136 |
| H                                | -4.481531      | -1.921727 | -0.309234 |
| H                                | -6.574545      | -0.871727 | 0.431416  |
| H                                | -6.658915      | 1.566110  | 0.898481  |
| H                                | -4.607153      | 2.941606  | 0.613191  |
| H                                | -2.483816      | 1.856397  | -0.133115 |
| C                                | -2.011066      | -0.691772 | -0.712019 |
| N                                | -0.959852      | 0.006523  | -0.777847 |
| Mg                               | 0.960266       | -0.260780 | -1.168040 |
| C                                | -2.067961      | -2.177667 | -1.043246 |
| H                                | -2.799460      | -2.399160 | -1.831882 |
| H                                | -1.081947      | -2.513677 | -1.381941 |
| H                                | -2.355382      | -2.778237 | -0.168391 |
| O                                | 1.609381       | -1.454020 | 0.403183  |
| C                                | 0.735749       | -2.012662 | 1.411650  |
| C                                | 2.975154       | -1.442910 | 0.871489  |
| C                                | 1.571920       | -2.037117 | 2.674174  |
| H                                | -0.161807      | -1.386235 | 1.460282  |
| H                                | 0.446119       | -3.023616 | 1.094938  |
| C                                | 2.967353       | -2.302875 | 2.119001  |
| H                                | 3.615715       | -1.812755 | 0.064703  |
| H                                | 3.253436       | -0.400968 | 1.094735  |
| H                                | 1.231319       | -2.796863 | 3.382452  |
| H                                | 1.538430       | -1.061815 | 3.177018  |
| H                                | 3.077422       | -3.361394 | 1.853929  |
| H                                | 3.771713       | -2.037793 | 2.810087  |
| O                                | 1.843877       | 1.384152  | -0.278729 |
| C                                | 1.282462       | 1.910771  | 0.943356  |
| C                                | 3.054111       | 2.092683  | -0.628725 |
| C                                | 1.996502       | 3.228808  | 1.154666  |
| H                                | 0.197983       | 1.975989  | 0.807472  |
| H                                | 1.495569       | 1.198714  | 1.756869  |
| C                                | 3.382517       | 2.922037  | 0.596728  |
| H                                | 3.816785       | 1.353835  | -0.897126 |
| H                                | 2.845471       | 2.716789  | -1.507079 |
| H                                | 2.005529       | 3.533936  | 2.204255  |
| H                                | 1.514420       | 4.021353  | 0.569418  |
| H                                | 3.959965       | 2.328483  | 1.317601  |
| H                                | 3.962930       | 3.814469  | 0.348868  |
| Cl                               | 2.468473       | -0.735052 | -2.882962 |

| <b>RC_Me<sub>2</sub>Mg</b> |                |           |           |
|----------------------------|----------------|-----------|-----------|
| Atom                       | Coordinate (Å) |           |           |
|                            | x              | y         | z         |
| C                          | 2.179835       | -1.116994 | 0.499651  |
| C                          | 3.565918       | -1.098970 | 0.471327  |
| C                          | 4.239219       | 0.012591  | -0.029958 |
| C                          | 3.533288       | 1.115060  | -0.505798 |
| C                          | 2.147033       | 1.114449  | -0.483317 |
| C                          | 1.473974       | -0.005911 | 0.020785  |
| H                          | 1.639431       | -1.976490 | 0.885805  |
| H                          | 4.123445       | -1.954715 | 0.840403  |
| H                          | 5.325703       | 0.019766  | -0.050133 |
| H                          | 4.065350       | 1.977974  | -0.895226 |
| H                          | 1.581401       | 1.966260  | -0.849941 |
| C                          | 0.049675       | -0.015143 | 0.043315  |
| N                          | -1.110146      | -0.020670 | 0.058833  |

|    |           |           |           |
|----|-----------|-----------|-----------|
| Mg | -3.355464 | 0.001633  | -0.010626 |
| C  | -3.953760 | -1.977541 | -0.520441 |
| H  | -3.506178 | -2.329991 | -1.462585 |
| H  | -3.660505 | -2.716458 | 0.241539  |
| H  | -5.041020 | -2.092370 | -0.643974 |
| C  | -3.950584 | 1.984413  | 0.485994  |
| H  | -3.653743 | 2.723125  | -0.274644 |
| H  | -5.038283 | 2.100098  | 0.604961  |
| H  | -3.506602 | 2.336173  | 1.430135  |

| <b>TS_Me<sub>2</sub>Mg</b> |                |           |           |
|----------------------------|----------------|-----------|-----------|
| Atom                       | Coordinate (Å) |           |           |
|                            | x              | y         | z         |
| C                          | -1.668226      | 1.010883  | -0.556126 |
| C                          | -3.039687      | 1.092217  | -0.354723 |
| C                          | -3.730496      | 0.023463  | 0.210987  |
| C                          | -3.050030      | -1.137694 | 0.564003  |
| C                          | -1.679879      | -1.231450 | 0.354335  |
| C                          | -0.984162      | -0.152956 | -0.200220 |
| H                          | -1.128068      | 1.841843  | -1.001691 |
| H                          | -3.572562      | 1.995529  | -0.639814 |
| H                          | -4.802841      | 0.095545  | 0.373745  |
| H                          | -3.587185      | -1.975760 | 1.000333  |
| H                          | -1.137671      | -2.137371 | 0.614630  |
| C                          | 0.444718       | -0.340776 | -0.444151 |
| N                          | 1.241931       | -1.075646 | -0.960282 |
| Mg                         | 2.767373       | 0.097997  | -0.130330 |
| C                          | 1.141865       | 1.372010  | 0.783609  |
| H                          | 0.657075       | 2.195051  | 0.250287  |
| H                          | 0.514069       | 1.094539  | 1.635720  |
| H                          | 2.060370       | 1.807663  | 1.227002  |
| C                          | 4.808141       | -0.238938 | 0.270607  |
| H                          | 4.956720       | -1.158214 | 0.854545  |
| H                          | 5.405581       | -0.356436 | -0.644460 |
| H                          | 5.279055       | 0.570626  | 0.845716  |

| <b>PR_Me<sub>2</sub>Mg</b> |                |           |           |
|----------------------------|----------------|-----------|-----------|
| Atom                       | Coordinate (Å) |           |           |
|                            | x              | y         | z         |
| C                          | 1.415504       | -1.197191 | -0.000693 |
| C                          | 2.724074       | -1.656662 | -0.000467 |
| C                          | 3.782958       | -0.749433 | 0.000282  |
| C                          | 3.514586       | 0.614535  | 0.000808  |
| C                          | 2.198279       | 1.069733  | 0.000518  |
| C                          | 1.126102       | 0.171324  | -0.000236 |
| H                          | 0.571131       | -1.883414 | -0.001140 |
| H                          | 2.924672       | -2.726276 | -0.000817 |
| H                          | 4.810661       | -1.105774 | 0.000439  |
| H                          | 4.333132       | 1.331253  | 0.001483  |
| H                          | 2.014190       | 2.141653  | 0.001117  |
| C                          | -0.319299      | 0.614183  | -0.000259 |
| N                          | -1.264150      | -0.222108 | 0.000653  |
| Mg                         | -3.210522      | -0.465268 | -0.000141 |
| C                          | -0.521792      | 2.122848  | -0.000925 |
| H                          | -0.068305      | 2.596819  | 0.880067  |
| H                          | -0.067236      | 2.596255  | -0.881680 |
| H                          | -1.593115      | 2.343430  | -0.001605 |
| C                          | -5.311841      | -0.457632 | 0.000574  |
| H                          | -5.724087      | 0.057624  | -0.878470 |
| H                          | -5.753100      | -1.464153 | 0.002072  |
| H                          | -5.724050      | 0.060332  | 0.878032  |

| <b>RCa_Me<sub>2</sub>Mg<sub>THF1</sub></b> |                |   |   |
|--------------------------------------------|----------------|---|---|
| Atom                                       | Coordinate (Å) |   |   |
|                                            | x              | y | z |

|    |           |           |           |
|----|-----------|-----------|-----------|
| C  | 2.723996  | 0.757092  | 0.506766  |
| C  | 4.068314  | 1.096034  | 0.525853  |
| C  | 5.020343  | 0.197154  | 0.050428  |
| C  | 4.636425  | -1.045702 | -0.447564 |
| C  | 3.295916  | -1.399813 | -0.475031 |
| C  | 2.342327  | -0.493542 | 0.003874  |
| H  | 1.967466  | 1.444616  | 0.877759  |
| H  | 4.375364  | 2.062717  | 0.913984  |
| H  | 6.072586  | 0.467903  | 0.068961  |
| H  | 5.384772  | -1.741394 | -0.815528 |
| H  | 2.979918  | -2.365132 | -0.859932 |
| C  | 0.960209  | -0.839950 | -0.013083 |
| N  | -0.170179 | -1.101733 | -0.018773 |
| Mg | -2.407381 | -1.426505 | 0.199526  |
| C  | -3.092835 | -2.164493 | -1.686047 |
| H  | -2.313292 | -2.131041 | -2.466083 |
| H  | -3.462683 | -3.201666 | -1.685369 |
| H  | -3.924472 | -1.557008 | -2.081375 |
| O  | -2.506254 | 0.700744  | -0.028963 |
| C  | -2.241847 | 1.278860  | -1.324075 |
| C  | -1.993914 | 1.561476  | 1.009055  |
| C  | -1.201408 | 2.349445  | -1.070637 |
| H  | -1.915752 | 0.476564  | -1.994799 |
| H  | -3.176783 | 1.703739  | -1.714563 |
| C  | -1.610690 | 2.851885  | 0.309214  |
| H  | -2.766365 | 1.674108  | 1.776334  |
| H  | -1.118504 | 1.075437  | 1.465188  |
| H  | -1.202595 | 3.126331  | -1.839911 |
| H  | -0.198333 | 1.902969  | -1.035699 |
| H  | -2.477547 | 3.519213  | 0.228433  |
| H  | -0.815645 | 3.388226  | 0.835172  |
| C  | -2.724575 | -1.710707 | 2.297440  |
| H  | -2.863393 | -2.754099 | 2.620431  |
| H  | -1.889978 | -1.321783 | 2.904984  |
| H  | -3.618464 | -1.171900 | 2.653657  |

| <b>Ts<sub>a</sub>_Me<sub>2</sub>Mg<sub>THF</sub>1</b> |                |           |           |
|-------------------------------------------------------|----------------|-----------|-----------|
| Atom                                                  | Coordinate (Å) |           |           |
|                                                       | x              | y         | z         |
| C                                                     | 2.372054       | -1.212560 | -0.330367 |
| C                                                     | 3.672791       | -1.648101 | -0.106168 |
| C                                                     | 4.691331       | -0.722788 | 0.099369  |
| C                                                     | 4.409253       | 0.641153  | 0.081279  |
| C                                                     | 3.110104       | 1.083867  | -0.129347 |
| C                                                     | 2.088821       | 0.155608  | -0.338733 |
| H                                                     | 1.568598       | -1.925822 | -0.504119 |
| H                                                     | 3.891072       | -2.712849 | -0.095942 |
| H                                                     | 5.708681       | -1.064216 | 0.272778  |
| H                                                     | 5.205988       | 1.364263  | 0.235129  |
| H                                                     | 2.882583       | 2.146910  | -0.141406 |
| C                                                     | 0.712548       | 0.563228  | -0.611501 |
| N                                                     | -0.176236      | 0.514851  | -1.415424 |
| Mg                                                    | -1.397193      | 1.526783  | -0.005476 |
| C                                                     | 0.369798       | 1.441735  | 1.409005  |
| H                                                     | 0.846709       | 0.596577  | 1.916055  |
| H                                                     | 1.080970       | 2.275334  | 1.397153  |
| H                                                     | -0.456802      | 1.754423  | 2.080137  |
| O                                                     | -2.419395      | -0.210466 | 0.560243  |
| C                                                     | -1.712983      | -1.383510 | 1.023620  |
| C                                                     | -3.491800      | -0.610759 | -0.332356 |
| C                                                     | -2.045872      | -2.452486 | 0.008483  |
| H                                                     | -0.649362      | -1.130634 | 1.092314  |
| H                                                     | -2.082977      | -1.640536 | 2.025250  |
| C                                                     | -3.503693      | -2.128074 | -0.297655 |
| H                                                     | -4.419117      | -0.144366 | 0.013907  |
| H                                                     | -3.260747      | -0.232781 | -1.338716 |

|   |           |           |           |
|---|-----------|-----------|-----------|
| H | -1.894090 | -3.463429 | 0.395806  |
| H | -1.426573 | -2.322515 | -0.889138 |
| H | -4.150638 | -2.490306 | 0.510546  |
| H | -3.860429 | -2.556789 | -1.237705 |
| C | -2.756667 | 3.111639  | -0.322434 |
| H | -3.156454 | 3.523986  | 0.616172  |
| H | -2.334010 | 3.964994  | -0.872195 |
| H | -3.632384 | 2.782415  | -0.903464 |

| <b>PR<sub>a</sub>_Me<sub>2</sub>Mg<sub>THF</sub>1</b> |                |           |           |
|-------------------------------------------------------|----------------|-----------|-----------|
| Atom                                                  | Coordinate (Å) |           |           |
|                                                       | x              | y         | z         |
| C                                                     | 2.936408       | 0.570036  | -1.052865 |
| C                                                     | 4.214452       | 0.345184  | -1.542459 |
| C                                                     | 5.134881       | -0.380770 | -0.787214 |
| C                                                     | 4.759421       | -0.874373 | 0.456872  |
| C                                                     | 3.474312       | -0.645373 | 0.942900  |
| C                                                     | 2.540013       | 0.080482  | 0.196208  |
| H                                                     | 2.199555       | 1.133887  | -1.621385 |
| H                                                     | 4.499660       | 0.736538  | -2.517122 |
| H                                                     | 6.138322       | -0.558759 | -1.167595 |
| H                                                     | 5.469393       | -1.441447 | 1.055436  |
| H                                                     | 3.204935       | -1.041472 | 1.919510  |
| C                                                     | 1.132755       | 0.355131  | 0.677817  |
| N                                                     | 0.307796       | 1.007999  | -0.020386 |
| Mg                                                    | -1.575570      | 1.621337  | 0.011941  |
| C                                                     | 0.810849       | -0.227885 | 2.049232  |
| H                                                     | 0.921828       | -1.321484 | 2.062718  |
| H                                                     | 1.473034       | 0.165030  | 2.832655  |
| H                                                     | -0.222869      | 0.016556  | 2.315644  |
| O                                                     | -2.621209      | -0.171844 | -0.110254 |
| C                                                     | -2.022720      | -1.487342 | -0.079293 |
| C                                                     | -4.043256      | -0.272155 | -0.350232 |
| C                                                     | -3.070676      | -2.398702 | -0.681957 |
| H                                                     | -1.077187      | -1.441913 | -0.627816 |
| H                                                     | -1.810304      | -1.747702 | 0.967092  |
| C                                                     | -4.361961      | -1.746517 | -0.199985 |
| H                                                     | -4.559186      | 0.377851  | 0.363701  |
| H                                                     | -4.248516      | 0.089399  | -1.366944 |
| H                                                     | -2.956672      | -3.435643 | -0.355226 |
| H                                                     | -3.014475      | -2.374956 | -1.777309 |
| H                                                     | -4.543502      | -1.993762 | 0.853222  |
| H                                                     | -5.243054      | -2.040072 | -0.776531 |
| C                                                     | -2.962280      | 3.211189  | 0.098733  |
| H                                                     | -2.510480      | 4.213150  | 0.088554  |
| H                                                     | -3.672027      | 3.187209  | -0.742759 |
| H                                                     | -3.579698      | 3.166886  | 1.009060  |

| <b>RC<sub>b</sub>_Me<sub>2</sub>Mg<sub>THF</sub>1</b> |                |           |           |
|-------------------------------------------------------|----------------|-----------|-----------|
| Atom                                                  | Coordinate (Å) |           |           |
|                                                       | x              | y         | z         |
| C                                                     | 3.684016       | 0.177905  | 1.158443  |
| C                                                     | 5.018180       | -0.195258 | 1.099524  |
| C                                                     | 5.564980       | -0.644245 | -0.100315 |
| C                                                     | 4.783432       | -0.723018 | -1.250611 |
| C                                                     | 3.447820       | -0.353170 | -1.209211 |
| C                                                     | 2.901626       | 0.096773  | -0.000434 |
| H                                                     | 3.242198       | 0.530469  | 2.086093  |
| H                                                     | 5.634147       | -0.135787 | 1.991971  |
| H                                                     | 6.611264       | -0.935266 | -0.139360 |
| H                                                     | 5.216955       | -1.073205 | -2.182750 |
| H                                                     | 2.824499       | -0.407326 | -2.097181 |
| C                                                     | 1.528996       | 0.476600  | 0.049480  |
| N                                                     | 0.411053       | 0.783449  | 0.088542  |
| Mg                                                    | -1.717661      | 1.484928  | 0.143241  |
| C                                                     | -2.066593      | 2.710907  | -1.574029 |

|   |           |           |           |
|---|-----------|-----------|-----------|
| H | -1.384258 | 3.568701  | -1.683313 |
| H | -1.972428 | 2.136414  | -2.511288 |
| H | -3.081308 | 3.141210  | -1.598819 |
| O | -2.341896 | -0.466599 | -0.491688 |
| C | -2.088718 | -1.579830 | 0.393985  |
| C | -3.698127 | -0.530635 | -0.978964 |
| C | -3.309976 | -2.474499 | 0.284039  |
| H | -1.154092 | -2.059693 | 0.085155  |
| H | -1.965553 | -1.180849 | 1.411300  |
| C | -4.410889 | -1.466839 | -0.026629 |
| H | -4.100121 | 0.489300  | -1.001917 |
| H | -3.685390 | -0.922857 | -2.005360 |
| H | -3.485876 | -3.048193 | 1.198006  |
| H | -3.197223 | -3.181756 | -0.547063 |
| H | -4.705727 | -0.928488 | 0.883414  |
| H | -5.305038 | -1.915041 | -0.468310 |
| C | -2.306869 | 1.492194  | 2.205100  |
| H | -1.626984 | 0.915689  | 2.855285  |
| H | -2.383614 | 2.486844  | 2.671534  |
| H | -3.298994 | 1.028053  | 2.345143  |

### TSb\_Me<sub>2</sub>Mg<sub>THF</sub>1

| Atom | Coordinate (Å) |           |           |
|------|----------------|-----------|-----------|
|      | x              | y         | z         |
| C    | -3.479944      | 0.992897  | -0.007602 |
| C    | -4.777936      | 0.560544  | 0.234555  |
| C    | -5.085235      | -0.796075 | 0.174815  |
| C    | -4.092398      | -1.723874 | -0.127561 |
| C    | -2.791933      | -1.299299 | -0.371181 |
| C    | -2.487413      | 0.061670  | -0.317541 |
| H    | -3.227319      | 2.050012  | 0.040663  |
| H    | -5.552269      | 1.285650  | 0.471391  |
| H    | -6.101390      | -1.131274 | 0.366500  |
| H    | -4.331300      | -2.783264 | -0.173507 |
| H    | -2.007384      | -2.015687 | -0.605363 |
| C    | -1.131385      | 0.516944  | -0.617773 |
| N    | -0.382394      | 0.876005  | -1.483371 |
| Mg   | 1.054672       | 1.205805  | 0.024637  |
| C    | -0.457260      | 0.373958  | 1.485002  |
| H    | -1.272317      | 0.958121  | 1.924736  |
| H    | -0.705218      | -0.689673 | 1.577311  |
| H    | 0.423744       | 0.538030  | 2.140737  |
| O    | 2.233074       | -0.520244 | -0.146857 |
| C    | 2.803909       | -1.101175 | 1.051290  |
| C    | 3.216416       | -0.527189 | -1.208764 |
| C    | 4.125943       | -1.700117 | 0.614190  |
| H    | 2.954897       | -0.299102 | 1.789495  |
| H    | 2.088036       | -1.823955 | 1.454270  |
| C    | 4.538184       | -0.757513 | -0.510193 |
| H    | 2.968605       | -1.339505 | -1.903932 |
| H    | 3.153200       | 0.428625  | -1.741136 |
| H    | 3.979527       | -2.715658 | 0.226602  |
| H    | 4.847536       | -1.747136 | 1.433863  |
| H    | 5.297390       | -1.174248 | -1.177044 |
| H    | 4.917394       | 0.187468  | -0.099107 |
| C    | 2.397214       | 2.810180  | 0.328487  |
| H    | 3.042852       | 2.634751  | 1.204195  |
| H    | 3.082193       | 2.940007  | -0.524281 |
| H    | 1.928954       | 3.791398  | 0.491064  |

### PRb\_Me<sub>2</sub>Mg<sub>THF</sub>1

| Atom | Coordinate (Å) |           |           |
|------|----------------|-----------|-----------|
|      | x              | y         | z         |
| C    | -2.182517      | -0.577743 | -0.940820 |
| C    | -3.182286      | -1.463339 | -1.315353 |
| C    | -4.429393      | -1.412702 | -0.693638 |

|    |           |           |           |
|----|-----------|-----------|-----------|
| C  | -4.659586 | -0.468429 | 0.300337  |
| C  | -3.651306 | 0.417473  | 0.672456  |
| C  | -2.395034 | 0.377748  | 0.058560  |
| H  | -1.200545 | -0.594770 | -1.411306 |
| H  | -2.993410 | -2.198636 | -2.095215 |
| H  | -5.215860 | -2.105829 | -0.983936 |
| H  | -5.629314 | -0.419267 | 0.791319  |
| H  | -3.854853 | 1.146911  | 1.453293  |
| C  | -1.262335 | 1.307240  | 0.438908  |
| N  | -0.142751 | 1.256765  | -0.133531 |
| Mg | 1.746991  | 1.514377  | -0.564374 |
| C  | -1.585926 | 2.281741  | 1.563004  |
| H  | -2.422748 | 2.943426  | 1.300974  |
| H  | -1.872559 | 1.762045  | 2.487507  |
| H  | -0.705107 | 2.897138  | 1.764014  |
| O  | 2.416907  | -0.431651 | -0.244043 |
| C  | 1.562715  | -1.522741 | 0.170149  |
| C  | 3.800272  | -0.747361 | 0.035880  |
| C  | 2.414289  | -2.324343 | 1.129603  |
| H  | 0.651819  | -1.087275 | 0.592379  |
| H  | 1.293498  | -2.110128 | -0.719170 |
| C  | 3.794226  | -2.194258 | 0.493765  |
| H  | 4.388010  | -0.566278 | -0.869792 |
| H  | 4.154585  | -0.069102 | 0.823720  |
| H  | 2.074223  | -3.358940 | 1.225229  |
| H  | 2.403582  | -1.864490 | 2.125779  |
| H  | 3.879726  | -2.869275 | -0.366549 |
| H  | 4.616634  | -2.412471 | 1.180159  |
| C  | 3.417066  | 2.737664  | -0.987191 |
| H  | 4.056935  | 2.865749  | -0.100568 |
| H  | 4.066993  | 2.306382  | -1.763995 |
| H  | 3.167391  | 3.752445  | -1.328251 |

### RCa\_Me<sub>2</sub>Mg<sub>THF</sub>2

| Atom | Coordinate (Å) |           |           |
|------|----------------|-----------|-----------|
|      | x              | y         | z         |
| C    | 3.930230       | 0.024893  | 1.318187  |
| C    | 5.314090       | 0.031559  | 1.226552  |
| C    | 5.931286       | 0.029924  | -0.022031 |
| C    | 5.170171       | 0.021488  | -1.188499 |
| C    | 3.785442       | 0.014753  | -1.114030 |
| C    | 3.168677       | 0.016544  | 0.143151  |
| H    | 3.433574       | 0.026207  | 2.284289  |
| H    | 5.913701       | 0.038158  | 2.132068  |
| H    | 7.016083       | 0.035333  | -0.086657 |
| H    | 5.657765       | 0.020293  | -2.158994 |
| H    | 3.177654       | 0.008334  | -2.014463 |
| C    | 1.744543       | 0.010917  | 0.225110  |
| N    | 0.586405       | 0.007182  | 0.288082  |
| Mg   | -1.697971      | 0.005161  | 0.435728  |
| C    | -2.381677      | -0.095935 | 2.476814  |
| H    | -2.459567      | 0.869153  | 3.005268  |
| H    | -3.372898      | -0.569067 | 2.587849  |
| H    | -1.706133      | -0.713391 | 3.095769  |
| O    | -1.318837      | 2.238858  | 0.397857  |
| C    | -2.490757      | 2.999425  | 0.740290  |
| C    | -0.710497      | 2.792541  | -0.781129 |
| C    | -2.404933      | 4.269894  | -0.082734 |
| H    | -3.383253      | 2.412279  | 0.472547  |
| H    | -2.493999      | 3.161311  | 1.822825  |
| C    | -1.728359      | 3.761835  | -1.349851 |
| H    | 0.219597       | 3.302529  | -0.489045 |
| H    | -0.464548      | 1.969640  | -1.461469 |
| H    | -1.769655      | 5.011427  | 0.418598  |
| H    | -3.385639      | 4.721741  | -0.256872 |
| H    | -1.269283      | 4.550013  | -1.953482 |

|   |           |           |           |
|---|-----------|-----------|-----------|
| H | -2.449968 | 3.219472  | -1.974736 |
| O | -1.310826 | -2.213244 | 0.307705  |
| C | -0.761258 | -2.728101 | -0.917991 |
| C | -2.420639 | -3.025761 | 0.718892  |
| C | -1.683916 | -3.856407 | -1.347841 |
| H | -0.710896 | -1.910150 | -1.647026 |
| H | 0.257886  | -3.085701 | -0.713062 |
| C | -2.236730 | -4.339261 | -0.012028 |
| H | -2.402040 | -3.100080 | 1.810583  |
| H | -3.360468 | -2.533804 | 0.418997  |
| H | -1.162020 | -4.630974 | -1.917023 |
| H | -2.497510 | -3.462888 | -1.970975 |
| H | -1.499408 | -4.965497 | 0.506413  |
| H | -3.167884 | -4.906145 | -0.100990 |
| C | -2.623462 | 0.065803  | -1.520249 |
| H | -3.388165 | 0.856154  | -1.624692 |
| H | -1.905083 | 0.263368  | -2.337943 |
| H | -3.132989 | -0.869509 | -1.813256 |

### TSa\_Me<sub>2</sub>Mg<sub>THF</sub><sub>2</sub>

| Atom | Coordinate (Å) |           |           |
|------|----------------|-----------|-----------|
|      | x              | y         | z         |
| C    | 3.368913       | 0.025538  | 0.107063  |
| C    | 4.684231       | -0.343498 | 0.353401  |
| C    | 5.085169       | -1.665549 | 0.172226  |
| C    | 4.169125       | -2.618178 | -0.262848 |
| C    | 2.852337       | -2.253726 | -0.521138 |
| C    | 2.451706       | -0.929491 | -0.336722 |
| H    | 3.039168       | 1.052880  | 0.251645  |
| H    | 5.400123       | 0.401850  | 0.690519  |
| H    | 6.114622       | -1.952768 | 0.371131  |
| H    | 4.480679       | -3.649861 | -0.405467 |
| H    | 2.129770       | -2.988328 | -0.869308 |
| C    | 1.081531       | -0.543176 | -0.658299 |
| N    | 0.294426       | -0.336614 | -1.535923 |
| Mg   | -1.071531      | 0.310709  | -0.021777 |
| C    | 0.476364       | -0.374995 | 1.498662  |
| H    | 1.305704       | 0.244507  | 1.857201  |
| H    | -0.394613      | -0.125551 | 2.144446  |
| H    | 0.709920       | -1.425285 | 1.712190  |
| O    | -1.881230      | -1.745359 | 0.054070  |
| C    | -2.674283      | -2.120988 | -1.088546 |
| C    | -2.549981      | -2.145736 | 1.264087  |
| C    | -4.041761      | -2.462735 | -0.533133 |
| H    | -2.679635      | -1.282775 | -1.794490 |
| H    | -2.200292      | -2.986110 | -1.572975 |
| C    | -3.678650      | -3.058081 | 0.822367  |
| H    | -1.816021      | -2.623444 | 1.921647  |
| H    | -2.939381      | -1.244769 | 1.763853  |
| H    | -4.599061      | -3.146808 | -1.179081 |
| H    | -4.632962      | -1.547042 | -0.402608 |
| H    | -3.316855      | -4.087050 | 0.702411  |
| H    | -4.508186      | -3.068633 | 1.534797  |
| O    | -0.048824      | 2.289310  | -0.063558 |
| C    | -0.050261      | 3.064890  | 1.144380  |
| C    | -0.363935      | 3.133220  | -1.188317 |
| C    | 0.076525       | 4.504159  | 0.689103  |
| H    | -0.999783      | 2.896009  | 1.678325  |
| H    | 0.774311       | 2.713456  | 1.773916  |
| C    | -0.736496      | 4.483069  | -0.600211 |
| H    | 0.525402       | 3.191658  | -1.830152 |
| H    | -1.179431      | 2.669306  | -1.757193 |
| H    | 1.125947       | 4.745934  | 0.478515  |
| H    | -0.297341      | 5.214489  | 1.431705  |
| H    | -0.508365      | 5.310744  | -1.277483 |
| H    | -1.809223      | 4.514421  | -0.370792 |

|   |           |          |           |
|---|-----------|----------|-----------|
| C | -3.020921 | 1.195178 | -0.091364 |
| H | -3.056437 | 2.261143 | 0.188683  |
| H | -3.431338 | 1.152002 | -1.115793 |
| H | -3.776585 | 0.696799 | 0.538772  |

### PRa\_Me<sub>2</sub>Mg<sub>THF</sub><sub>2</sub>

| Atom | Coordinate (Å) |           |           |
|------|----------------|-----------|-----------|
|      | x              | y         | z         |
| C    | -4.188589      | -0.684248 | -1.103317 |
| C    | -5.562360      | -0.509295 | -0.951888 |
| C    | -6.072309      | 0.044675  | 0.216506  |
| C    | -5.196322      | 0.421137  | 1.234313  |
| C    | -3.829829      | 0.241952  | 1.078044  |
| C    | -3.297416      | -0.312011 | -0.090965 |
| H    | -3.814810      | -1.120560 | -2.027001 |
| H    | -6.235805      | -0.808187 | -1.752737 |
| H    | -7.144757      | 0.182774  | 0.335664  |
| H    | -5.585854      | 0.855558  | 2.153160  |
| H    | -3.124750      | 0.524149  | 1.857567  |
| C    | -1.797348      | -0.485056 | -0.204419 |
| N    | -1.017899      | -0.175654 | 0.740077  |
| Mg   | 0.932582       | -0.155714 | 1.161645  |
| C    | -1.329685      | -1.050025 | -1.543052 |
| H    | -1.662763      | -0.430296 | -2.387830 |
| H    | -0.236300      | -1.092420 | -1.556312 |
| H    | -1.721980      | -2.060974 | -1.722543 |
| O    | 1.556810       | 1.611308  | 0.239943  |
| C    | 2.530845       | 2.570094  | 0.698084  |
| C    | 0.990349       | 2.029247  | -1.021116 |
| C    | 2.795009       | 3.455745  | -0.503039 |
| H    | 2.100483       | 3.133159  | 1.536937  |
| H    | 3.410636       | 2.024350  | 1.056765  |
| C    | 1.431603       | 3.468800  | -1.185975 |
| H    | 1.397914       | 1.383206  | -1.813449 |
| H    | -0.092923      | 1.878859  | -0.968257 |
| H    | 3.545419       | 2.994952  | -1.158795 |
| H    | 3.153422       | 4.448324  | -0.217956 |
| H    | 1.470834       | 3.774294  | -2.234854 |
| H    | 0.745816       | 4.142063  | -0.657196 |
| O    | 2.011120       | -1.198039 | -0.367665 |
| C    | 1.933890       | -2.639551 | -0.339765 |
| C    | 3.380679       | -0.789050 | -0.580449 |
| C    | 3.356072       | -3.098477 | -0.103810 |
| H    | 1.228067       | -2.933138 | 0.446514  |
| H    | 1.544166       | -2.988260 | -1.306581 |
| H    | 4.138895       | -2.062768 | -0.902677 |
| C    | 3.398010       | -0.037479 | -1.378108 |
| H    | 3.750627       | -0.329825 | 0.348013  |
| H    | 3.526709       | -4.127944 | -0.429453 |
| H    | 3.601608       | -3.023456 | 0.963649  |
| H    | 4.081973       | -2.286577 | -1.975145 |
| H    | 5.193630       | -1.997639 | -0.622568 |
| C    | 2.051562       | -0.620136 | 2.908562  |
| H    | 1.739633       | -0.087934 | 3.820270  |
| H    | 1.980555       | -1.692040 | 3.157589  |
| H    | 3.131028       | -0.419175 | 2.803920  |

### RCb\_Me<sub>2</sub>Mg<sub>THF</sub><sub>2</sub>

| Atom | Coordinate (Å) |           |           |
|------|----------------|-----------|-----------|
|      | x              | y         | z         |
| C    | -4.182466      | 0.434517  | 0.954266  |
| C    | -5.538032      | 0.719864  | 0.882827  |
| C    | -6.368088      | -0.040908 | 0.063072  |
| C    | -5.848858      | -1.091201 | -0.689879 |
| C    | -4.495065      | -1.387639 | -0.629930 |
| C    | -3.663073      | -0.621136 | 0.194363  |

|    |           |           |           |
|----|-----------|-----------|-----------|
| H  | -3.521676 | 1.014761  | 1.593956  |
| H  | -5.948966 | 1.536607  | 1.469206  |
| H  | -7.429576 | 0.186317  | 0.011376  |
| H  | -6.501754 | -1.681263 | -1.326517 |
| H  | -4.075007 | -2.203087 | -1.211846 |
| C  | -2.265913 | -0.908684 | 0.262353  |
| N  | -1.126338 | -1.124998 | 0.324809  |
| Mg | 1.339874  | -1.146519 | 0.173454  |
| C  | 1.737859  | -1.359535 | 2.279457  |
| H  | 1.241978  | -2.208209 | 2.778885  |
| H  | 2.814299  | -1.480962 | 2.496725  |
| H  | 1.430589  | -0.468406 | 2.856893  |
| O  | 0.797466  | 0.911011  | -0.177483 |
| C  | 0.579616  | 1.355376  | -1.526567 |
| C  | 0.125646  | 1.777684  | 0.749506  |
| C  | 0.018626  | 2.756749  | -1.391011 |
| H  | 1.534645  | 1.294467  | -2.060212 |
| H  | -0.139750 | 0.675714  | -2.009327 |
| C  | -0.789308 | 2.634380  | -0.103863 |
| H  | -0.397134 | 1.158594  | 1.487261  |
| H  | 0.881792  | 2.383716  | 1.271082  |
| H  | -0.576046 | 3.056733  | -2.257978 |
| H  | 0.831780  | 3.482887  | -1.262399 |
| H  | -1.732529 | 2.105010  | -0.299637 |
| H  | -1.025012 | 3.594171  | 0.363808  |
| O  | 3.332639  | -0.220793 | -0.309770 |
| C  | 3.772868  | 0.863304  | 0.525133  |
| C  | 4.419974  | -1.122395 | -0.550854 |
| C  | 5.217512  | 0.552928  | 0.885271  |
| H  | 3.674917  | 1.797266  | -0.048451 |
| H  | 3.115579  | 0.920827  | 1.401410  |
| C  | 5.667833  | -0.303730 | -0.292539 |
| H  | 4.350167  | -1.973245 | 0.147297  |
| H  | 4.323577  | -1.504190 | -1.572127 |
| H  | 5.257741  | -0.034084 | 1.812020  |
| H  | 5.817360  | 1.455987  | 1.029923  |
| H  | 6.543188  | -0.922575 | -0.075714 |
| H  | 5.896666  | 0.325269  | -1.162355 |
| C  | 1.336806  | -2.361105 | -1.605029 |
| H  | 1.578894  | -1.765067 | -2.503949 |
| H  | 2.086746  | -3.171070 | -1.596115 |
| H  | 0.376949  | -2.855523 | -1.829763 |

| <b>TSb_Me<sub>2</sub>Mg<sub>THF</sub>2</b> |                |           |           |
|--------------------------------------------|----------------|-----------|-----------|
| Atom                                       | Coordinate (Å) |           |           |
|                                            | x              | y         | z         |
| C                                          | -4.072548      | -1.297606 | 0.045224  |
| C                                          | -5.422037      | -1.139872 | 0.330456  |
| C                                          | -6.014329      | 0.117849  | 0.239922  |
| C                                          | -5.255284      | 1.219662  | -0.143052 |
| C                                          | -3.905588      | 1.068232  | -0.439064 |
| C                                          | -3.313092      | -0.192897 | -0.346203 |
| H                                          | -3.595806      | -2.273017 | 0.119050  |
| H                                          | -6.014872      | -2.001429 | 0.626926  |
| H                                          | -7.070211      | 0.238638  | 0.468813  |
| H                                          | -5.716153      | 2.201614  | -0.215270 |
| H                                          | -3.303823      | 1.920878  | -0.745970 |
| C                                          | -1.909043      | -0.349764 | -0.700187 |
| N                                          | -1.093509      | -0.388604 | -1.573002 |
| Mg                                         | 0.357569       | -0.906300 | -0.063256 |
| C                                          | -1.262866      | -0.537025 | 1.488844  |
| H                                          | -1.872797      | -1.392336 | 1.805161  |
| H                                          | -0.346129      | -0.561369 | 2.119557  |
| H                                          | -1.785351      | 0.386901  | 1.765589  |
| O                                          | 0.692782       | 1.291353  | 0.063198  |
| C                                          | 1.242538       | 1.959988  | -1.085483 |

|   |           |           |           |
|---|-----------|-----------|-----------|
| C | 1.225377  | 1.875917  | 1.264326  |
| C | 2.451405  | 2.710994  | -0.568592 |
| H | 1.469149  | 1.209301  | -1.851374 |
| H | 0.482204  | 2.641178  | -1.493797 |
| C | 1.973553  | 3.119268  | 0.819838  |
| H | 0.396281  | 2.072111  | 1.952167  |
| H | 1.909359  | 1.152866  | 1.734601  |
| H | 2.730103  | 3.554543  | -1.205848 |
| H | 3.310393  | 2.030660  | -0.488292 |
| H | 1.291181  | 3.975583  | 0.750837  |
| H | 2.783922  | 3.383435  | 1.504783  |
| O | 2.639698  | -0.640843 | -0.034199 |
| C | 3.428096  | -0.948533 | -1.190106 |
| C | 3.326804  | -1.257547 | 1.059876  |
| C | 4.886965  | -0.952492 | -0.710267 |
| H | 3.123260  | -1.932611 | -1.576661 |
| H | 3.211528  | -0.192055 | -1.951780 |
| C | 4.771620  | -0.869361 | 0.820701  |
| H | 2.890901  | -0.879151 | 1.991210  |
| H | 3.177413  | -2.348204 | 1.016448  |
| H | 5.451710  | -0.108943 | -1.118066 |
| H | 5.392758  | -1.869940 | -1.026366 |
| H | 4.936246  | 0.157983  | 1.167909  |
| H | 5.477445  | -1.521521 | 1.342164  |
| C | 0.600050  | -3.034043 | -0.058142 |
| H | 1.374868  | -3.455456 | -0.720152 |
| H | 0.833529  | -3.426069 | 0.947299  |
| H | -0.342947 | -3.528475 | -0.349379 |

| <b>PRb_Me<sub>2</sub>Mg<sub>THF</sub>2</b> |                |           |           |
|--------------------------------------------|----------------|-----------|-----------|
| Atom                                       | Coordinate (Å) |           |           |
|                                            | x              | y         | z         |
| C                                          | 4.361131       | -0.859214 | 0.048274  |
| C                                          | 5.520501       | -0.266681 | -0.447435 |
| C                                          | 5.536967       | 1.088744  | -0.754848 |
| C                                          | 4.382965       | 1.848030  | -0.562925 |
| C                                          | 3.231322       | 1.251548  | -0.071267 |
| C                                          | 3.195265       | -0.111083 | 0.244110  |
| H                                          | 4.374378       | -1.921450 | 0.282322  |
| H                                          | 6.414766       | -0.869498 | -0.592490 |
| H                                          | 6.442064       | 1.552935  | -1.140453 |
| H                                          | 4.386693       | 2.910663  | -0.798734 |
| H                                          | 2.317113       | 1.821030  | 0.087822  |
| C                                          | 1.907311       | -0.707988 | 0.770805  |
| N                                          | 0.858900       | -0.015669 | 0.896587  |
| Mg                                         | -1.046259      | -0.256164 | 1.465148  |
| C                                          | 1.993675       | -2.192675 | 1.110715  |
| C                                          | 2.765116       | -2.401429 | 1.864527  |
| H                                          | 1.028289       | -2.531771 | 1.501677  |
| H                                          | 2.243089       | -2.800544 | 0.228903  |
| O                                          | -1.753926      | -1.591220 | -0.022267 |
| C                                          | -0.948943      | -2.091115 | -1.112316 |
| C                                          | -3.147069      | -1.589190 | -0.391702 |
| C                                          | -1.873648      | -2.095860 | -2.312640 |
| H                                          | -0.071183      | -1.441674 | -1.204554 |
| H                                          | -0.612566      | -3.105524 | -0.857383 |
| C                                          | -3.219669      | -2.405843 | -1.666892 |
| H                                          | -3.725539      | -2.000050 | 0.441971  |
| H                                          | -3.458421      | -0.545367 | -0.556735 |
| H                                          | -1.571453      | -2.826724 | -3.067489 |
| H                                          | -1.895532      | -1.105964 | -2.788090 |
| H                                          | -3.291856      | -3.474950 | -1.432329 |
| H                                          | -4.077576      | -2.133296 | -2.287292 |
| O                                          | -1.925098      | 1.305256  | 0.364917  |
| C                                          | -1.429304      | 1.700550  | -0.927714 |
| C                                          | -3.045697      | 2.124457  | 0.750938  |

|   |           |           |           |
|---|-----------|-----------|-----------|
| C | -2.048847 | 3.059758  | -1.177014 |
| H | -0.334746 | 1.679059  | -0.881794 |
| H | -1.768981 | 0.963065  | -1.673939 |
| C | -3.406589 | 2.904353  | -0.499008 |
| H | -3.842418 | 1.467614  | 1.118846  |
| H | -2.729528 | 2.783472  | 1.570683  |
| H | -2.116576 | 3.300355  | -2.241311 |
| H | -1.461078 | 3.843323  | -0.683072 |
| H | -4.082251 | 2.316690  | -1.134586 |
| H | -3.895620 | 3.854847  | -0.269953 |
| C | -2.259061 | -0.416143 | 3.208144  |
| H | -1.942399 | -1.173274 | 3.941353  |
| H | -2.319678 | 0.531730  | 3.766972  |
| H | -3.300949 | -0.671801 | 2.950689  |

#### RCa\_MeMgClZn

| Atom | Coordinate (Å) |           |           |
|------|----------------|-----------|-----------|
|      | x              | y         | z         |
| C    | -2.843046      | -0.437461 | -0.652554 |
| C    | -2.378392      | 0.756268  | -0.082151 |
| C    | -3.252841      | 1.656430  | 0.539396  |
| C    | -4.604435      | 1.352790  | 0.585239  |
| C    | -5.073540      | 0.169253  | 0.019098  |
| C    | -4.198434      | -0.722693 | -0.597111 |
| H    | -2.138791      | -1.117935 | -1.127336 |
| H    | -2.868377      | 2.573378  | 0.976263  |
| H    | -5.295145      | 2.040101  | 1.064403  |
| H    | -6.134763      | -0.060976 | 0.059331  |
| H    | -4.574298      | -1.642380 | -1.035232 |
| C    | -0.985615      | 1.029413  | -0.135699 |
| N    | 0.158464       | 1.210817  | -0.193211 |
| Mg   | 2.322117       | 0.964079  | -0.170239 |
| C    | 3.485610       | -0.814825 | -0.312984 |
| H    | 3.651330       | -1.375179 | 0.616925  |
| H    | 3.287003       | -1.537207 | -1.115700 |
| Cl   | 3.032590       | 3.175629  | -0.136981 |
| H    | 4.468726       | -0.383118 | -0.562640 |
| Zn   | 1.109943       | -1.851081 | 0.199879  |
| C    | 1.184068       | -1.731672 | 2.131641  |
| H    | 0.353448       | -2.253763 | 2.622249  |
| H    | 2.113787       | -2.157289 | 2.530544  |
| H    | 1.145365       | -0.687993 | 2.474940  |
| C    | 0.504039       | -2.140453 | -1.618473 |
| H    | -0.415533      | -2.738308 | -1.673322 |
| H    | 0.301794       | -1.192786 | -2.137799 |
| H    | 1.254010       | -2.666755 | -2.223394 |

#### TSa\_MeMgClZn

| Atom | Coordinate (Å) |           |           |
|------|----------------|-----------|-----------|
|      | x              | y         | z         |
| C    | 2.780570       | 0.419042  | 0.390554  |
| C    | 1.964802       | -0.690570 | 0.171535  |
| C    | 2.529824       | -1.909307 | -0.224662 |
| C    | 3.904495       | -2.013230 | -0.381597 |
| C    | 4.716682       | -0.903822 | -0.161389 |
| C    | 4.153477       | 0.311272  | 0.219408  |
| H    | 2.327895       | 1.363155  | 0.682282  |
| H    | 1.879983       | -2.762201 | -0.403445 |
| H    | 4.342863       | -2.961473 | -0.680760 |
| H    | 5.793022       | -0.985847 | -0.289177 |
| H    | 4.786591       | 1.178677  | 0.384533  |
| C    | 0.509783       | -0.647070 | 0.259393  |
| N    | -0.460476      | -1.274092 | -0.066456 |
| Mg   | -2.440645      | -0.691351 | -0.136428 |
| C    | -2.585951      | 1.497097  | 0.223500  |
| H    | -3.139251      | 1.199687  | 1.130509  |

|    |           |           |           |
|----|-----------|-----------|-----------|
| H  | -2.348150 | 2.549286  | 0.439725  |
| Cl | -4.448406 | -1.809221 | -0.129625 |
| H  | -3.316028 | 1.580504  | -0.595381 |
| Zn | -0.512074 | 1.399003  | -0.069574 |
| C  | 0.106029  | 0.853982  | 1.863698  |
| H  | 0.957840  | 0.368755  | 2.345852  |
| H  | 0.199329  | 1.922896  | 2.129377  |
| H  | -0.810056 | 0.461751  | 2.320742  |
| C  | 0.415072  | 2.228508  | -1.588191 |
| H  | 0.954428  | 1.491069  | -2.197232 |
| H  | -0.266329 | 2.765260  | -2.259834 |
| H  | 1.165363  | 2.954597  | -1.247511 |

#### PRa\_MeMgClZn

| Atom | Coordinate (Å) |           |           |
|------|----------------|-----------|-----------|
|      | x              | y         | z         |
| C    | -2.970503      | -1.685117 | -0.493316 |
| C    | -1.951284      | -0.924645 | 0.091552  |
| C    | -2.300805      | 0.247753  | 0.767922  |
| C    | -3.622045      | 0.664509  | 0.842435  |
| C    | -4.623843      | -0.089205 | 0.236335  |
| C    | -4.294167      | -1.264412 | -0.431529 |
| H    | -2.732040      | -2.605843 | -1.020533 |
| H    | -1.514680      | 0.833921  | 1.236229  |
| H    | -3.871363      | 1.578854  | 1.375900  |
| H    | -5.659815      | 0.236703  | 0.288408  |
| H    | -5.071252      | -1.857863 | -0.906957 |
| C    | -0.517099      | -1.335020 | 0.006299  |
| N    | 0.440391       | -0.496709 | 0.076536  |
| Mg   | 2.450795       | -0.399075 | 0.086245  |
| C    | 2.630183       | 1.852322  | 0.166984  |
| H    | 3.198261       | 2.042741  | -0.754716 |
| H    | 2.347863       | 2.849200  | 0.529290  |
| Cl   | 4.459602       | -1.526905 | 0.097014  |
| H    | 3.378109       | 1.543640  | 0.920489  |
| Zn   | 0.562954       | 1.487499  | -0.122223 |
| C    | -0.268193      | -2.812426 | -0.174670 |
| H    | -0.577883      | -3.134642 | -1.177107 |
| H    | 0.796691       | -3.036401 | -0.065669 |
| H    | -0.841471      | -3.412510 | 0.541606  |
| C    | -0.702708      | 2.864264  | -0.694445 |
| H    | -0.209356      | 3.710502  | -1.188786 |
| H    | -1.450623      | 2.468975  | -1.393702 |
| H    | -1.263785      | 3.272857  | 0.156903  |

#### RCb\_MeMgClZn

| Atom | Coordinate (Å) |           |           |
|------|----------------|-----------|-----------|
|      | x              | y         | z         |
| C    | -2.727795      | -0.632848 | -0.418420 |
| C    | -2.390820      | 0.710845  | -0.205723 |
| C    | -3.359778      | 1.655521  | 0.157906  |
| C    | -4.674966      | 1.244416  | 0.307186  |
| C    | -5.016669      | -0.089827 | 0.096936  |
| C    | -4.048822      | -1.024323 | -0.263862 |
| H    | -1.955361      | -1.345099 | -0.700337 |
| H    | -3.074958      | 2.691192  | 0.319067  |
| H    | -5.436343      | 1.965607  | 0.588843  |
| H    | -6.049865      | -0.404779 | 0.216035  |
| H    | -4.324942      | -2.061976 | -0.425656 |
| C    | -1.036583      | 1.116441  | -0.355762 |
| N    | 0.069401       | 1.444169  | -0.476639 |
| Mg   | 2.203022       | 1.824741  | -0.385847 |
| Zn   | 1.211649       | -1.653404 | 0.468991  |
| C    | 1.663782       | -0.921190 | 2.197535  |
| H    | 1.134660       | -1.397514 | 3.031990  |
| H    | 2.738139       | -1.011350 | 2.404644  |

|    |           |           |           |
|----|-----------|-----------|-----------|
| H  | 1.427607  | 0.151989  | 2.252654  |
| C  | 0.363647  | -2.478874 | -1.058661 |
| H  | -0.501886 | -3.108712 | -0.814810 |
| H  | 0.026919  | -1.716042 | -1.775720 |
| H  | 1.066307  | -3.115805 | -1.612037 |
| Cl | 3.115258  | -0.256652 | -0.994781 |
| C  | 2.855396  | 3.638058  | 0.451985  |
| H  | 2.373016  | 4.513763  | -0.005642 |
| H  | 2.642846  | 3.699386  | 1.529003  |
| H  | 3.938595  | 3.789151  | 0.345446  |

### TSb\_MeMgClZn

| Atom | Coordinate (Å) |           |           |
|------|----------------|-----------|-----------|
|      | x              | y         | z         |
| C    | -2.626299      | -0.466118 | 0.424576  |
| C    | -1.822151      | 0.642126  | 0.161217  |
| C    | -2.406298      | 1.833946  | -0.281803 |
| C    | -3.782624      | 1.915842  | -0.437332 |
| C    | -4.581866      | 0.806479  | -0.172325 |
| C    | -4.001706      | -0.385340 | 0.252116  |
| H    | -2.170314      | -1.394478 | 0.760874  |
| H    | -1.766500      | 2.687646  | -0.490619 |
| H    | -4.233839      | 2.848077  | -0.766757 |
| H    | -5.659848      | 0.871454  | -0.296129 |
| H    | -4.622357      | -1.254137 | 0.453941  |
| C    | -0.358801      | 0.622043  | 0.283805  |
| N    | 0.560486       | 1.303672  | -0.099262 |
| Mg   | 2.632898       | 1.428412  | -0.136271 |
| Zn   | 0.534603       | -1.416122 | -0.038578 |
| C    | 0.056026       | -0.658994 | 1.852171  |
| H    | -0.754159      | -0.155893 | 2.383513  |
| H    | -0.047206      | -1.720749 | 2.148177  |
| H    | 1.011280       | -0.275982 | 2.222794  |
| C    | -0.185402      | -2.421616 | -1.532893 |
| H    | -0.660522      | -1.746377 | -2.255369 |
| H    | 0.587360       | -2.986854 | -2.064926 |
| H    | -0.952534      | -3.133772 | -1.206570 |
| C    | 3.972014       | 3.043669  | -0.229596 |
| H    | 3.893033       | 3.699122  | 0.649268  |
| H    | 5.025229       | 2.737291  | -0.292908 |
| H    | 3.780511       | 3.679346  | -1.105901 |
| Cl   | 2.908014       | -1.013524 | 0.084026  |

### PRb\_MeMgClZn

| Atom | Coordinate (Å) |           |           |
|------|----------------|-----------|-----------|
|      | x              | y         | z         |
| C    | 2.911142       | 1.520443  | -0.475373 |
| C    | 1.849284       | 0.814939  | 0.101182  |
| C    | 2.123993       | -0.405607 | 0.727379  |
| C    | 3.413563       | -0.917840 | 0.763473  |
| C    | 4.455630       | -0.218304 | 0.161792  |
| C    | 4.200344       | 1.000988  | -0.457839 |
| H    | 2.729981       | 2.475826  | -0.962049 |
| H    | 1.322473       | -0.945322 | 1.226437  |
| H    | 3.606372       | -1.860117 | 1.270111  |
| H    | 5.466255       | -0.617919 | 0.185157  |
| H    | 5.009954       | 1.553740  | -0.927585 |
| C    | 0.452868       | 1.343190  | 0.063500  |
| N    | -0.574599      | 0.582725  | 0.020195  |
| Mg   | -2.603953      | 1.064502  | 0.099537  |
| Zn   | -0.549638      | -1.309052 | -0.210441 |
| C    | 0.323521       | 2.844336  | 0.078741  |
| H    | 0.656838       | 3.265231  | -0.878298 |
| H    | -0.717566      | 3.146474  | 0.228757  |
| H    | 0.949628       | 3.293897  | 0.857589  |
| C    | 0.036481       | -3.101300 | -0.576591 |

|    |           |           |           |
|----|-----------|-----------|-----------|
| H  | -0.673591 | -3.647093 | -1.207332 |
| H  | 1.009205  | -3.111257 | -1.082771 |
| H  | 0.152559  | -3.672041 | 0.352686  |
| Cl | -3.137528 | -1.294385 | 0.273796  |
| C  | -3.605766 | 2.903473  | -0.103031 |
| H  | -4.699104 | 2.816085  | -0.171137 |
| H  | -3.401067 | 3.580495  | 0.739774  |
| H  | -3.281552 | 3.439095  | -1.007837 |

### RCa\_MeMgClZn<sub>THF1</sub>

| Atom | Coordinate (Å) |           |           |
|------|----------------|-----------|-----------|
|      | X              | y         | z         |
| C    | -3.676148      | 0.108389  | -0.079333 |
| C    | -2.875228      | 1.233377  | 0.164060  |
| C    | -3.437608      | 2.502907  | 0.342819  |
| C    | -4.815503      | 2.640588  | 0.276470  |
| C    | -5.617793      | 1.527214  | 0.035144  |
| C    | -5.051947      | 0.266826  | -0.142633 |
| H    | -3.209117      | -0.865338 | -0.219796 |
| H    | -2.797221      | 3.359504  | 0.532035  |
| H    | -5.266668      | 3.618739  | 0.413968  |
| H    | -6.697082      | 1.643720  | -0.014955 |
| H    | -5.684912      | -0.595232 | -0.331117 |
| C    | -1.468016      | 1.041737  | 0.237113  |
| N    | -0.331031      | 0.816509  | 0.299462  |
| Mg   | 1.412594       | -0.509246 | 0.421773  |
| C    | 1.486163       | -1.879450 | -1.372667 |
| H    | 2.559296       | -1.824025 | -1.119597 |
| H    | 1.384329       | -2.913151 | -1.733258 |
| H    | 1.344368       | -1.242226 | -2.255933 |
| Zn   | -0.305583      | -2.256553 | -0.297475 |
| C    | -0.295405      | -1.901909 | 1.701735  |
| H    | -1.358449      | -1.739103 | 1.931406  |
| H    | -0.003708      | -2.842762 | 2.189904  |
| H    | 0.225220       | -1.127841 | 2.286275  |
| C    | -1.811012      | -2.731375 | -1.477505 |
| H    | -2.727060      | -3.031828 | -0.950249 |
| H    | -2.082556      | -1.880472 | -2.120036 |
| H    | -1.562772      | -3.556286 | -2.159303 |
| O    | 2.439547       | 0.991887  | -0.658850 |
| C    | 2.327681       | 2.371681  | -0.237896 |
| C    | 3.787189       | 0.732365  | -1.124130 |
| C    | 3.537689       | 3.061236  | -0.829579 |
| H    | 1.367265       | 2.755633  | -0.593119 |
| H    | 2.342960       | 2.404323  | 0.862092  |
| C    | 4.587582       | 1.961065  | -0.744338 |
| H    | 4.150401       | -0.183017 | -0.643509 |
| H    | 3.744444       | 0.578378  | -2.210203 |
| H    | 3.807195       | 3.967144  | -0.280161 |
| H    | 3.349335       | 3.334774  | -1.875203 |
| H    | 4.956093       | 1.865880  | 0.284865  |
| H    | 5.444498       | 2.117917  | -1.404782 |
| Cl   | 3.039146       | -0.546810 | 2.114862  |

### TSa\_MeMgClZn<sub>THF1</sub>

| Atom | Coordinate (Å) |           |           |
|------|----------------|-----------|-----------|
|      | x              | y         | z         |
| C    | 3.628744       | 0.005588  | -0.400478 |
| C    | 2.704076       | -0.505835 | 0.509694  |
| C    | 3.026632       | -1.624958 | 1.284999  |
| C    | 4.277609       | -2.213498 | 1.159468  |
| C    | 5.197942       | -1.704462 | 0.247500  |
| C    | 4.869337       | -0.601366 | -0.536834 |
| H    | 3.360524       | 0.871785  | -1.001233 |
| H    | 2.291776       | -2.015540 | 1.984580  |
| H    | 4.533405       | -3.072783 | 1.773665  |

|    |           |           |           |
|----|-----------|-----------|-----------|
| H  | 6.175942  | -2.168409 | 0.148010  |
| H  | 5.585951  | -0.208606 | -1.252987 |
| C  | 1.354914  | 0.029142  | 0.658577  |
| N  | 0.253127  | -0.327055 | 0.973609  |
| Mg | -1.596701 | 0.580511  | 0.803559  |
| C  | -1.273410 | 2.533082  | -0.221204 |
| H  | -1.403943 | 2.959204  | 0.787978  |
| H  | -0.879312 | 3.387297  | -0.790126 |
| Cl | -3.099657 | 0.614750  | 2.549467  |
| O  | -2.418209 | -0.704058 | -0.573831 |
| C  | -2.047459 | -2.108189 | -0.507585 |
| C  | -3.785677 | -0.576998 | -1.039717 |
| H  | -1.073081 | -2.221539 | -0.992504 |
| H  | -1.953786 | -2.383901 | 0.552183  |
| C  | -3.184608 | -2.847722 | -1.181240 |
| C  | -4.377922 | -1.956139 | -0.858052 |
| H  | -4.279106 | 0.201516  | -0.447882 |
| H  | -3.759856 | -0.270097 | -2.093090 |
| H  | -3.288128 | -3.868531 | -0.804622 |
| H  | -3.025082 | -2.895495 | -2.265156 |
| H  | -5.241598 | -2.127764 | -1.505481 |
| H  | -4.690662 | -2.095014 | 0.184905  |
| H  | -2.276732 | 2.398206  | -0.659192 |
| Zn | 0.450130  | 1.538818  | -0.854286 |
| C  | 1.720831  | 2.229821  | 0.686020  |
| H  | 2.744946  | 2.027337  | 1.003249  |
| H  | 1.776908  | 3.166761  | 0.100810  |
| H  | 1.105271  | 2.431485  | 1.570179  |
| C  | 0.812341  | 0.753916  | -2.619868 |
| H  | 1.632718  | 1.264510  | -3.141324 |
| H  | 1.108294  | -0.301078 | -2.534628 |
| H  | -0.060091 | 0.786793  | -3.284696 |

**PRa\_MeMgClZn<sub>THF</sub>1**

| Atom | Coordinate (Å) |           |           |
|------|----------------|-----------|-----------|
|      | x              | y         | z         |
| C    | 4.048821       | 0.905669  | -0.053280 |
| C    | 2.748318       | 0.433045  | -0.257990 |
| C    | 2.580861       | -0.871280 | -0.734388 |
| C    | 3.676165       | -1.686658 | -0.984183 |
| C    | 4.964904       | -1.212013 | -0.752006 |
| C    | 5.147718       | 0.085338  | -0.285093 |
| H    | 4.208914       | 1.918729  | 0.309245  |
| H    | 1.575150       | -1.234988 | -0.936819 |
| H    | 3.525520       | -2.693326 | -1.366456 |
| H    | 5.824286       | -1.850456 | -0.941743 |
| H    | 6.150928       | 0.463164  | -0.103076 |
| C    | 1.552751       | 1.290723  | 0.011126  |
| N    | 0.427816       | 0.790490  | 0.332284  |
| Mg   | -0.605244      | -0.815232 | 1.003320  |
| C    | -2.407147      | 0.432170  | 1.839972  |
| H    | -2.261097      | -0.465421 | 2.468791  |
| H    | -2.616124      | 1.199400  | 2.599620  |
| Cl   | -0.174546      | -2.720061 | 2.241536  |
| O    | -1.492401      | -1.474982 | -0.757535 |
| C    | -1.417403      | -0.722656 | -1.989285 |
| C    | -2.751462      | -2.199529 | -0.741997 |
| H    | -0.727113      | 0.111683  | -1.825424 |
| H    | -1.015629      | -1.374389 | -2.777958 |
| C    | -2.852935      | -0.336146 | -2.250821 |
| C    | -3.580056      | -1.630622 | -1.893039 |
| H    | -2.538609      | -3.268393 | -0.846272 |
| H    | -3.219517      | -2.030678 | 0.234558  |
| H    | -3.026310      | -0.015307 | -3.281354 |
| H    | -3.142930      | 0.482726  | -1.577092 |
| H    | -4.622647      | -1.472393 | -1.605424 |

|    |           |           |           |
|----|-----------|-----------|-----------|
| H  | -3.568690 | -2.316461 | -2.747617 |
| H  | -3.361922 | 0.260357  | 1.322913  |
| Zn | -1.319781 | 1.719295  | 0.626467  |
| C  | 1.763218  | 2.779066  | -0.120387 |
| H  | 2.339189  | 3.037046  | -1.016433 |
| H  | 0.792012  | 3.282803  | -0.150423 |
| H  | 2.320256  | 3.168444  | 0.741672  |
| C  | -2.031284 | 3.219212  | -0.415847 |
| H  | -1.708223 | 4.199399  | -0.040975 |
| H  | -1.685836 | 3.156471  | -1.457737 |
| H  | -3.128296 | 3.235082  | -0.444357 |

**RCb\_MeMgClZn<sub>THF</sub>1**

| Atom | Coordinate (Å) |           |           |
|------|----------------|-----------|-----------|
|      | x              | y         | z         |
| C    | -3.603721      | 0.202652  | -0.332394 |
| C    | -2.952867      | -0.872472 | 0.289836  |
| C    | -3.633519      | -2.054601 | 0.605846  |
| C    | -4.979422      | -2.156004 | 0.290590  |
| C    | -5.633072      | -1.092859 | -0.329180 |
| C    | -4.950204      | 0.081271  | -0.638999 |
| H    | -3.047628      | 1.111803  | -0.555774 |
| H    | -3.107539      | -2.871953 | 1.090337  |
| H    | -5.521875      | -3.065888 | 0.529348  |
| H    | -6.688660      | -1.180333 | -0.572046 |
| H    | -5.469627      | 0.904937  | -1.119518 |
| C    | -1.572842      | -0.729479 | 0.593811  |
| N    | -0.446618      | -0.558408 | 0.811313  |
| Mg   | 1.497387       | 0.325550  | 1.062035  |
| C    | 1.975460       | 2.350104  | 0.465199  |
| H    | 3.042984       | 2.068475  | 0.531858  |
| H    | 1.972105       | 3.061214  | -0.375763 |
| H    | 1.766081       | 2.956623  | 1.358054  |
| Zn   | 0.095790       | 1.952017  | -0.705622 |
| C    | 0.348853       | 0.694342  | -2.202318 |
| H    | -0.605365      | 0.475908  | -2.702509 |
| H    | 1.022039       | 1.077886  | -2.982610 |
| H    | 0.758427       | -0.275649 | -1.887223 |
| C    | -1.252045      | 3.055007  | 0.213328  |
| H    | -2.100187      | 3.360500  | -0.414893 |
| H    | -1.682572      | 2.525302  | 1.077201  |
| H    | -0.815575      | 3.979449  | 0.617023  |
| O    | 2.557899       | -0.914357 | -0.179500 |
| C    | 3.472389       | -0.462536 | -1.208227 |
| C    | 2.371336       | -2.347119 | -0.261480 |
| C    | 3.601960       | -1.642160 | -2.148062 |
| H    | 3.043545       | 0.433722  | -1.668509 |
| H    | 4.426528       | -0.207052 | -0.729119 |
| C    | 3.463948       | -2.824759 | -1.194925 |
| H    | 2.427611       | -2.754435 | 0.753307  |
| H    | 1.369619       | -2.538494 | -0.672191 |
| H    | 4.547406       | -1.632260 | -2.696418 |
| H    | 2.780213       | -1.636459 | -2.875925 |
| H    | 4.397684       | -2.982059 | -0.641693 |
| H    | 3.199320       | -3.759837 | -1.695222 |
| Cl   | 2.127572       | -0.206065 | 3.232659  |

**TSb\_MeMgClZn<sub>THF</sub>1**

| Atom | Coordinate (Å) |          |           |
|------|----------------|----------|-----------|
|      | x              | y        | z         |
| C    | 3.481755       | 0.001944 | -0.337758 |
| C    | 2.454687       | 0.605107 | 0.388576  |
| C    | 2.718603       | 1.729032 | 1.177340  |
| C    | 4.004010       | 2.252995 | 1.224476  |
| C    | 5.029062       | 1.646852 | 0.504225  |
| C    | 4.768218       | 0.517869 | -0.269026 |



|    |           |           |           |
|----|-----------|-----------|-----------|
| H  | 3.265531  | -0.879206 | -0.937838 |
| H  | 1.908203  | 2.181508  | 1.744639  |
| H  | 4.206190  | 3.133586  | 1.828513  |
| H  | 6.035875  | 2.054593  | 0.545819  |
| H  | 5.570848  | 0.040213  | -0.824466 |
| C  | 1.092302  | 0.076718  | 0.427921  |
| N  | 0.197309  | -0.052120 | 1.223875  |
| Mg | -1.720479 | -0.689690 | 0.775191  |
| C  | -1.619526 | -2.248015 | -0.835598 |
| H  | -2.454448 | -1.623531 | -1.200667 |
| H  | -1.349407 | -2.803146 | -1.745141 |
| H  | -2.053864 | -3.015235 | -0.178782 |
| Zn | 0.415837  | -1.833370 | -0.676530 |
| C  | 0.642548  | 0.030789  | -1.700322 |
| H  | 1.610070  | 0.328965  | -2.106216 |
| H  | 0.106365  | -0.513694 | -2.500297 |
| H  | 0.035206  | 0.922357  | -1.505809 |
| C  | 1.786867  | -3.176864 | -0.256841 |
| H  | 2.512109  | -3.308484 | -1.070973 |
| H  | 2.364215  | -2.894434 | 0.633874  |
| H  | 1.350402  | -4.163366 | -0.056788 |
| O  | -2.190613 | 1.027422  | -0.267582 |
| C  | -2.982783 | 1.141172  | -1.472589 |
| C  | -1.917524 | 2.338766  | 0.282913  |
| C  | -2.951601 | 2.616204  | -1.816601 |
| H  | -2.532367 | 0.499161  | -2.238037 |
| H  | -3.997978 | 0.784200  | -1.251651 |
| C  | -2.873003 | 3.263976  | -0.438813 |
| H  | -2.065158 | 2.287953  | 1.366870  |
| H  | -0.865643 | 2.586260  | 0.077146  |
| H  | -3.825608 | 2.924308  | -2.395788 |
| H  | -2.052044 | 2.849837  | -2.400371 |
| H  | -3.855663 | 3.253070  | 0.047709  |
| H  | -2.511422 | 4.295096  | -0.462243 |
| Cl | -3.464043 | -1.076261 | 2.231188  |

#### PRb\_MeMgClZn<sub>THF1</sub>

| Atom | Coordinate (Å) |           |           |
|------|----------------|-----------|-----------|
|      | x              | y         | z         |
| C    | -2.327096      | 2.303294  | -0.180766 |
| C    | -1.353844      | 1.631339  | 0.566950  |
| C    | -1.770582      | 0.780976  | 1.596633  |
| C    | -3.120514      | 0.590463  | 1.860865  |
| C    | -4.081240      | 1.244297  | 1.091012  |
| C    | -3.680794      | 2.101201  | 0.070399  |
| H    | -2.029411      | 2.977476  | -0.981378 |
| H    | -1.016572      | 0.288531  | 2.209079  |
| H    | -3.425497      | -0.063806 | 2.674221  |
| H    | -5.138636      | 1.092811  | 1.293435  |
| H    | -4.424549      | 2.617631  | -0.531572 |
| C    | 0.103228       | 1.773049  | 0.257301  |
| N    | 0.917542       | 0.819770  | 0.474156  |
| Mg   | 0.891397       | -1.208870 | 0.404428  |
| C    | 2.712062       | -1.350594 | -0.991347 |
| H    | 1.952512       | -2.034776 | -1.412689 |
| H    | 3.210488       | -0.985540 | -1.900890 |
| H    | 3.447500       | -1.998676 | -0.496347 |
| Zn   | 2.770797       | 0.588245  | -0.188595 |
| C    | 0.530712       | 3.078559  | -0.365890 |
| H    | 0.085611       | 3.946211  | 0.134269  |
| H    | 1.621800       | 3.154862  | -0.334639 |
| H    | 0.220577       | 3.120613  | -1.419103 |
| C    | 4.383659       | 1.677870  | -0.004225 |
| H    | 4.228769       | 2.717419  | -0.320946 |
| H    | 4.714833       | 1.714698  | 1.041384  |
| H    | 5.225355       | 1.289497  | -0.591205 |

|    |           |           |           |
|----|-----------|-----------|-----------|
| O  | -0.694664 | -1.581095 | -0.858988 |
| C  | -0.903052 | -0.827938 | -2.076790 |
| C  | -1.929910 | -2.223591 | -0.449490 |
| C  | -2.243485 | -1.298477 | -2.600033 |
| H  | -0.920958 | 0.242569  | -1.823305 |
| H  | -0.059397 | -1.024459 | -2.746840 |
| C  | -3.000056 | -1.583561 | -1.307614 |
| H  | -1.829098 | -3.300237 | -0.635037 |
| H  | -2.062858 | -2.057230 | 0.625083  |
| H  | -2.125223 | -2.216777 | -3.188048 |
| H  | -2.725365 | -0.546108 | -3.230027 |
| H  | -3.864743 | -2.238229 | -1.444105 |
| H  | -3.342646 | -0.646393 | -0.847396 |
| Cl | 0.803341  | -2.921290 | 1.969503  |

#### RCa\_MeMgClZn<sub>THF2</sub>

| Atom | Coordinate (Å) |           |           |
|------|----------------|-----------|-----------|
|      | x              | y         | z         |
| C    | 3.673003       | -0.353460 | -2.123360 |
| C    | 4.994591       | -0.768911 | -2.074025 |
| C    | 5.515948       | -1.299565 | -0.895670 |
| C    | 4.723634       | -1.419489 | 0.243870  |
| C    | 3.399299       | -1.010238 | 0.215376  |
| C    | 2.882308       | -0.477846 | -0.974449 |
| H    | 3.249664       | 0.060670  | -3.033972 |
| H    | 5.620951       | -0.680064 | -2.956703 |
| H    | 6.552789       | -1.623806 | -0.865995 |
| H    | 5.139378       | -1.834316 | 1.157331  |
| H    | 2.751782       | -1.088730 | 1.088174  |
| C    | 1.518039       | -0.076107 | -0.984780 |
| N    | 0.398578       | 0.227750  | -0.940493 |
| Mg   | -1.612769      | 0.520213  | -0.053254 |
| Cl   | -3.538559      | 0.967065  | -1.391083 |
| C    | -1.839806      | 0.445470  | 2.158973  |
| H    | -2.890032      | 0.340490  | 1.824551  |
| H    | -1.765659      | 1.466917  | 2.556647  |
| C    | 0.269230       | -2.383322 | 1.629569  |
| H    | 1.066581       | -2.887790 | 2.196075  |
| H    | -0.658029      | -2.931822 | 1.851742  |
| H    | 0.481056       | -2.576408 | 0.567170  |
| H    | -1.839823      | -0.221313 | 3.038461  |
| Zn   | 0.142929       | -0.446957 | 2.053542  |
| C    | 1.513423       | 0.818150  | 2.743584  |
| H    | 1.107303       | 1.602803  | 3.399283  |
| H    | 2.272122       | 0.286672  | 3.337786  |
| H    | 2.076270       | 1.343284  | 1.954988  |
| O    | -1.080550      | 2.582605  | -0.103137 |
| C    | -0.949785      | 3.256231  | -1.377973 |
| C    | -0.200602      | 3.200996  | 0.859489  |
| C    | 0.030425       | 4.394240  | -1.144246 |
| H    | -0.560396      | 2.529243  | -2.104757 |
| H    | -1.943504      | 3.574738  | -1.705485 |
| C    | 0.862242       | 3.872630  | 0.021538  |
| H    | -0.777314      | 3.933775  | 1.442632  |
| H    | 0.169614       | 2.420679  | 1.529106  |
| H    | -0.501291      | 5.306575  | -0.847212 |
| H    | 0.616876       | 4.620895  | -2.038850 |
| H    | 1.396842       | 4.656105  | 0.565686  |
| H    | 1.593462       | 3.127779  | -0.323193 |
| O    | -1.944817      | -1.536759 | -0.386205 |
| C    | -3.087104      | -2.161992 | 0.235064  |
| C    | -1.589152      | -2.236515 | -1.590738 |
| C    | -3.584341      | -3.174743 | -0.772124 |
| H    | -2.747803      | -2.630634 | 1.169469  |
| H    | -3.825455      | -1.385973 | 0.467122  |
| C    | -2.294005      | -3.571868 | -1.482212 |

|   |           |           |           |
|---|-----------|-----------|-----------|
| H | -1.943280 | -1.653369 | -2.454811 |
| H | -0.497219 | -2.311456 | -1.630882 |
| H | -4.269277 | -2.691059 | -1.485875 |
| H | -4.107792 | -4.011923 | -0.307780 |
| H | -2.450501 | -4.044721 | -2.455449 |
| H | -1.707639 | -4.254187 | -0.852631 |

**TSa\_MeMgClZn<sub>THF</sub>2**

| Atom | Coordinate (Å) |           |           |
|------|----------------|-----------|-----------|
|      | x              | y         | z         |
| C    | 3.358931       | 0.704862  | -1.468174 |
| C    | 4.655966       | 0.454742  | -1.899090 |
| C    | 5.377736       | -0.604878 | -1.357520 |
| C    | 4.803352       | -1.415025 | -0.381076 |
| C    | 3.515404       | -1.159367 | 0.069441  |
| C    | 2.790493       | -0.098984 | -0.476443 |
| H    | 2.776849       | 1.520215  | -1.892348 |
| H    | 5.102118       | 1.086637  | -2.662602 |
| H    | 6.391189       | -0.801215 | -1.698158 |
| H    | 5.364132       | -2.247483 | 0.035645  |
| H    | 3.055706       | -1.783180 | 0.832625  |
| C    | 1.408747       | 0.175193  | -0.091449 |
| N    | 0.339546       | 0.402997  | -0.582987 |
| Mg   | -1.674379      | 0.478665  | 0.022169  |
| Cl   | -3.785638      | 0.751726  | -1.012357 |
| C    | -1.526911      | 0.054933  | 2.285148  |
| H    | -2.447145      | -0.547718 | 2.239996  |
| H    | -1.833386      | 1.114401  | 2.281359  |
| C    | 0.626731       | -2.769017 | 1.590768  |
| H    | 1.473630       | -3.066616 | 2.225101  |
| H    | -0.229074      | -3.385060 | 1.899249  |
| H    | 0.881470       | -3.080814 | 0.566374  |
| H    | -1.190924      | -0.071179 | 3.325415  |
| Zn   | 0.229866       | -0.840485 | 1.670202  |
| C    | 1.804247       | 0.561474  | 2.045944  |
| H    | 1.243865       | 0.814055  | 2.963654  |
| H    | 2.697493       | -0.003552 | 2.329705  |
| H    | 2.139530       | 1.525240  | 1.644093  |
| O    | -1.430731      | 2.597168  | 0.185152  |
| C    | -1.460975      | 3.331373  | -1.064874 |
| C    | -0.459468      | 3.194540  | 1.071596  |
| C    | -0.590733      | 4.552488  | -0.838432 |
| H    | -1.045429      | 2.683356  | -1.851542 |
| H    | -2.504414      | 3.550468  | -1.307091 |
| C    | 0.422272       | 4.034941  | 0.175674  |
| H    | -0.994665      | 3.810006  | 1.808168  |
| H    | 0.068224       | 2.391696  | 1.595042  |
| H    | -1.179029      | 5.369710  | -0.403209 |
| H    | -0.140013      | 4.913924  | -1.766532 |
| H    | 0.943622       | 4.825827  | 0.721594  |
| H    | 1.171369       | 3.399633  | -0.317649 |
| O    | -1.700254      | -1.596016 | -0.454466 |
| C    | -2.736064      | -2.474714 | 0.034225  |
| C    | -1.172301      | -2.095255 | -1.702091 |
| C    | -3.073430      | -3.369652 | -1.139167 |
| H    | -2.328550      | -3.038124 | 0.885983  |
| H    | -3.576695      | -1.857976 | 0.370676  |
| C    | -1.718958      | -3.502760 | -1.823828 |
| H    | -1.531202      | -1.443976 | -2.513312 |
| H    | -0.079509      | -2.036525 | -1.657776 |
| H    | -3.788177      | -2.863887 | -1.801355 |
| H    | -3.505364      | -4.324247 | -0.827022 |
| H    | -1.781473      | -3.835630 | -2.863337 |
| H    | -1.080931      | -4.206320 | -1.273244 |

**PRa\_MeMgClZn<sub>THF</sub>2**

| Atom | Coordinate (Å) |           |           |
|------|----------------|-----------|-----------|
|      | x              | y         | z         |
| C    | 2.128312       | 0.302402  | 1.780653  |
| C    | 3.312974       | -0.129508 | 2.361828  |
| C    | 4.505265       | 0.541722  | 2.096064  |
| C    | 4.495451       | 1.658520  | 1.266830  |
| C    | 3.302751       | 2.096917  | 0.697993  |
| C    | 2.105559       | 1.411287  | 0.928583  |
| H    | 1.192180       | -0.212685 | 1.994664  |
| H    | 3.306539       | -0.989274 | 3.028144  |
| H    | 5.435594       | 0.201862  | 2.544560  |
| H    | 5.419944       | 2.192672  | 1.060548  |
| H    | 3.313335       | 2.969622  | 0.048365  |
| C    | 0.832323       | 1.806664  | 0.243728  |
| N    | -0.079850      | 0.958567  | 0.000933  |
| Mg   | -0.487212      | -1.029022 | -0.287750 |
| Cl   | -0.672811      | -3.021491 | 0.958336  |
| C    | -1.574096      | -0.470897 | -2.416140 |
| H    | -1.388643      | -1.553733 | -2.290219 |
| H    | -0.908388      | -0.187547 | -3.243370 |
| C    | -3.047925      | 2.606158  | -1.051739 |
| H    | -2.843528      | 3.437455  | -1.739237 |
| H    | -4.066837      | 2.258698  | -1.272294 |
| H    | -3.073833      | 3.042492  | -0.042176 |
| H    | -2.592182      | -0.466314 | -2.830233 |
| Zn   | -1.728164      | 1.152576  | -1.144216 |
| C    | 0.729666       | 3.252018  | -0.187227 |
| H    | -0.309579      | 3.482499  | -0.442697 |
| H    | 1.079586       | 3.946894  | 0.585241  |
| H    | 1.342733       | 3.430951  | -1.081431 |
| O    | 1.288331       | -1.548857 | -1.290427 |
| C    | 2.273734       | -2.431702 | -0.694820 |
| C    | 1.940378       | -0.624276 | -2.192486 |
| C    | 3.550456       | -2.185009 | -1.471844 |
| H    | 2.386116       | -2.155410 | 0.362567  |
| H    | 1.892724       | -3.454645 | -0.752738 |
| C    | 3.412735       | -0.716040 | -1.852063 |
| H    | 1.735388       | -0.947329 | -3.222406 |
| H    | 1.505357       | 0.369350  | -2.035765 |
| H    | 3.584606       | -2.812933 | -2.370836 |
| H    | 4.439809       | -2.397168 | -0.871470 |
| H    | 4.050763       | -0.418801 | -2.688868 |
| H    | 3.644005       | -0.071886 | -0.992276 |
| O    | -2.459797      | -0.358788 | 0.514607  |
| C    | -3.685567      | -1.073740 | 0.218252  |
| C    | -2.527384      | 0.203449  | 1.847548  |
| C    | -4.440982      | -1.124662 | 1.530413  |
| H    | -4.227203      | -0.503609 | -0.549429 |
| H    | -3.419934      | -2.058490 | -0.181076 |
| C    | -3.998175      | 0.172309  | 2.197432  |
| H    | -1.930448      | -0.430893 | 2.519367  |
| H    | -2.083875      | 1.203203  | 1.804751  |
| H    | -4.112535      | -1.987731 | 2.123466  |
| H    | -5.521843      | -1.198515 | 1.383713  |
| H    | -4.172163      | 0.193686  | 3.276457  |
| H    | -4.510618      | 1.031430  | 1.744453  |

**RCb\_MeMgClZn<sub>THF</sub>2**

| Atom | Coordinate (Å) |           |          |
|------|----------------|-----------|----------|
|      | x              | y         | z        |
| C    | -4.250514      | 1.610911  | 0.744702 |
| C    | -5.636725      | 1.589873  | 0.764739 |
| C    | -6.319450      | 0.390650  | 0.572384 |
| C    | -5.624176      | -0.797311 | 0.359167 |
| C    | -4.237644      | -0.796425 | 0.337768 |
| C    | -3.557357      | 0.413876  | 0.531683 |

|    |           |           |           |
|----|-----------|-----------|-----------|
| H  | -3.701731 | 2.536684  | 0.892911  |
| H  | -6.187809 | 2.510799  | 0.931010  |
| H  | -7.406047 | 0.382224  | 0.589483  |
| H  | -6.164495 | -1.727612 | 0.210683  |
| H  | -3.669004 | -1.710957 | 0.178557  |
| C  | -2.135219 | 0.390249  | 0.499242  |
| N  | -0.980426 | 0.291672  | 0.446964  |
| Mg | 1.229811  | -0.277355 | 0.447920  |
| C  | 1.544229  | -1.724163 | -1.181411 |
| H  | 2.361063  | -2.184386 | -0.600199 |
| H  | 2.011558  | -1.038170 | -1.907408 |
| C  | -1.290476 | -3.070956 | 0.353177  |
| H  | -2.166155 | -3.671994 | 0.067096  |
| H  | -0.523066 | -3.789398 | 0.675764  |
| H  | -1.578408 | -2.516344 | 1.258608  |
| H  | 1.191306  | -2.557891 | -1.808982 |
| Zn | -0.649699 | -1.875744 | -1.085486 |
| C  | -1.291864 | -0.997560 | -2.739808 |
| H  | -0.467071 | -0.588842 | -3.343865 |
| H  | -1.839554 | -1.682172 | -3.403064 |
| H  | -1.979380 | -0.159560 | -2.547913 |
| O  | 1.336005  | 1.651609  | -0.375185 |
| C  | 1.373579  | 2.793863  | 0.507708  |
| C  | 0.719443  | 2.012761  | -1.632661 |
| C  | 1.109089  | 3.983012  | -0.390790 |
| H  | 0.584656  | 2.677420  | 1.266044  |
| H  | 2.348290  | 2.800142  | 1.007115  |
| C  | 0.131712  | 3.389505  | -1.399027 |
| H  | 1.505403  | 2.025793  | -2.401299 |
| H  | -0.020198 | 1.246963  | -1.893386 |
| H  | 2.033470  | 4.296900  | -0.891687 |
| H  | 0.707614  | 4.838143  | 0.159013  |
| H  | 0.046784  | 3.967887  | -2.322633 |
| H  | -0.868502 | 3.303876  | -0.953609 |
| Cl | 1.127324  | -0.550446 | 2.793452  |
| O  | 3.372766  | 0.010352  | 0.523805  |
| C  | 4.215142  | -0.872726 | 1.300268  |
| C  | 4.126600  | 0.564845  | -0.572980 |
| C  | 5.618670  | -0.659576 | 0.768377  |
| H  | 4.081740  | -0.627863 | 2.357428  |
| H  | 3.873211  | -1.906281 | 1.138439  |
| C  | 5.349875  | -0.318049 | -0.691643 |
| H  | 3.492500  | 0.570951  | -1.465258 |
| H  | 4.391453  | 1.603835  | -0.327566 |
| H  | 6.250805  | -1.540968 | 0.905030  |
| H  | 6.097906  | 0.187214  | 1.275382  |
| H  | 5.102004  | -1.225894 | -1.257806 |
| H  | 6.183702  | 0.183605  | -1.190124 |

| <b>TSb_MeMgClZn<sub>THF2</sub></b> |                |           |           |
|------------------------------------|----------------|-----------|-----------|
| Atom                               | Coordinate (Å) |           |           |
|                                    | x              | y         | z         |
| C                                  | -3.731150      | 1.621095  | 0.340904  |
| C                                  | -5.059114      | 1.995855  | 0.502836  |
| C                                  | -6.064734      | 1.035823  | 0.442247  |
| C                                  | -5.743677      | -0.300504 | 0.214229  |
| C                                  | -4.420614      | -0.678802 | 0.030391  |
| C                                  | -3.412145      | 0.282839  | 0.098435  |
| H                                  | -2.930579      | 2.355957  | 0.402969  |
| H                                  | -5.308226      | 3.038384  | 0.683042  |
| H                                  | -7.103127      | 1.328848  | 0.574846  |
| H                                  | -6.529203      | -1.050514 | 0.175437  |
| H                                  | -4.156643      | -1.718252 | -0.153260 |
| C                                  | -1.998044      | -0.063478 | 0.001587  |
| N                                  | -0.968277      | 0.118821  | 0.587060  |
| Mg                                 | 1.134191       | -0.232242 | 0.527833  |

|    |           |           |           |
|----|-----------|-----------|-----------|
| C  | 1.013200  | -1.423241 | -1.493520 |
| H  | 2.008210  | -1.740978 | -1.151903 |
| H  | 1.117733  | -0.443010 | -1.988608 |
| C  | -1.474200 | -3.462692 | 0.368096  |
| H  | -2.244076 | -4.037064 | -0.164956 |
| H  | -0.688793 | -4.172306 | 0.657279  |
| H  | -1.936191 | -3.113432 | 1.302743  |
| H  | 0.812167  | -2.108003 | -2.329839 |
| Zn | -0.804498 | -1.938574 | -0.678983 |
| C  | -2.043798 | -0.858139 | -2.055751 |
| H  | -1.489673 | -1.458611 | -2.797655 |
| H  | -3.101749 | -1.109533 | -2.152046 |
| H  | -1.899502 | 0.186233  | -2.360396 |
| O  | 1.318731  | 1.779122  | -0.045354 |
| C  | 1.851957  | 2.765524  | 0.867864  |
| C  | 0.600220  | 2.431565  | -1.115814 |
| C  | 1.843556  | 4.052107  | 0.074577  |
| H  | 1.194902  | 2.821177  | 1.747643  |
| H  | 2.842440  | 2.423328  | 1.186377  |
| C  | 0.559209  | 3.898253  | -0.731973 |
| H  | 1.160623  | 2.268420  | -2.047570 |
| H  | -0.387245 | 1.964089  | -1.205969 |
| H  | 2.715089  | 4.091102  | -0.592154 |
| H  | 1.856502  | 4.938213  | 0.714158  |
| H  | 0.508068  | 4.552581  | -1.605957 |
| H  | -0.312655 | 4.102675  | -0.097964 |
| Cl | 1.398471  | -0.983730 | 2.742346  |
| O  | 3.266507  | -0.165731 | 0.205777  |
| C  | 4.142011  | -1.196377 | 0.724952  |
| C  | 3.887952  | 0.480770  | -0.925905 |
| C  | 5.476022  | -0.959583 | 0.048355  |
| H  | 4.152951  | -1.111360 | 1.814170  |
| H  | 3.718777  | -2.176499 | 0.457044  |
| C  | 5.044238  | -0.418793 | -1.308485 |
| H  | 3.140184  | 0.598436  | -1.717179 |
| H  | 4.229065  | 1.479044  | -0.614653 |
| H  | 6.075595  | -1.871545 | -0.013351 |
| H  | 6.054932  | -0.204413 | 0.594400  |
| H  | 4.689191  | -1.236383 | -1.949804 |
| H  | 5.832564  | 0.118743  | -1.842165 |

| <b>PRb_MeMgClZn<sub>THF2</sub></b> |                |           |           |
|------------------------------------|----------------|-----------|-----------|
| Atom                               | Coordinate (Å) |           |           |
|                                    | x              | y         | z         |
| C                                  | 2.577168       | -0.418885 | 1.368173  |
| C                                  | 3.373894       | -1.499329 | 1.727026  |
| C                                  | 4.484121       | -1.837513 | 0.955318  |
| C                                  | 4.802474       | -1.074212 | -0.163873 |
| C                                  | 4.017173       | 0.023088  | -0.507013 |
| C                                  | 2.884456       | 0.353848  | 0.243647  |
| H                                  | 1.707592       | -0.148484 | 1.967859  |
| H                                  | 3.130240       | -2.078855 | 2.615144  |
| H                                  | 5.104117       | -2.687060 | 1.231570  |
| H                                  | 5.669268       | -1.328857 | -0.769393 |
| H                                  | 4.281673       | 0.615216  | -1.381270 |
| C                                  | 1.989656       | 1.494278  | -0.137853 |
| N                                  | 0.737338       | 1.446275  | 0.066313  |
| Mg                                 | -0.850234      | 0.154416  | 0.413577  |
| C                                  | -2.147612      | 1.562599  | -1.128041 |
| H                                  | -3.061268      | 1.367453  | -0.550272 |
| H                                  | -1.944371      | 0.659839  | -1.729223 |
| C                                  | -0.553390      | 4.731909  | -0.260978 |
| H                                  | -0.114072      | 5.182480  | -1.162260 |
| H                                  | -1.532304      | 5.206199  | -0.116733 |
| H                                  | 0.080545       | 5.046829  | 0.578702  |
| H                                  | -2.461614      | 2.290274  | -1.889406 |

|    |           |           |           |
|----|-----------|-----------|-----------|
| Zn | -0.652652 | 2.776200  | -0.414544 |
| C  | 2.675150  | 2.672615  | -0.789986 |
| H  | 1.981377  | 3.517409  | -0.843172 |
| H  | 3.580555  | 2.972884  | -0.249046 |
| H  | 2.984408  | 2.425578  | -1.814437 |
| O  | 0.041090  | -1.502367 | -0.534864 |
| C  | 0.251104  | -2.779159 | 0.109495  |
| C  | 0.734172  | -1.459892 | -1.800411 |
| C  | 0.799246  | -3.672108 | -0.982776 |
| H  | 0.977468  | -2.639184 | 0.923353  |
| H  | -0.705965 | -3.101578 | 0.534302  |
| C  | 1.624838  | -2.685376 | -1.801505 |
| H  | -0.017005 | -1.499568 | -2.603863 |
| H  | 1.275997  | -0.509343 | -1.862188 |
| H  | -0.019544 | -4.082662 | -1.588832 |
| H  | 1.383226  | -4.505415 | -0.583093 |
| H  | 1.847070  | -3.034986 | -2.813220 |
| H  | 2.573342  | -2.462917 | -1.293385 |
| Cl | -1.108629 | 0.260268  | 2.766855  |
| O  | -2.575642 | -1.144908 | 0.226902  |
| C  | -3.761230 | -0.983193 | 1.043655  |
| C  | -2.908785 | -1.865208 | -0.976432 |
| C  | -4.818061 | -1.851978 | 0.391503  |
| H  | -3.506398 | -1.259681 | 2.069945  |
| H  | -4.044390 | 0.079556  | 1.031844  |
| C  | -4.416252 | -1.785613 | -1.076260 |
| H  | -2.382449 | -1.404508 | -1.819394 |
| H  | -2.561450 | -2.904838 | -0.875187 |
| H  | -5.829837 | -1.487201 | 0.587183  |
| H  | -4.749371 | -2.883602 | 0.758666  |
| H  | -4.712494 | -0.822313 | -1.512061 |
| H  | -4.838947 | -2.587154 | -1.687894 |

#### RcC\_MeMgClZn<sub>THF</sub>2

| Atom | Coordinate (Å) |           |           |
|------|----------------|-----------|-----------|
|      | x              | y         | z         |
| C    | -4.051592      | 0.028698  | -2.224045 |
| C    | -5.429104      | 0.175800  | -2.282597 |
| C    | -6.159938      | 0.381215  | -1.114295 |
| C    | -5.522076      | 0.441890  | 0.122591  |
| C    | -4.144961      | 0.299184  | 0.201140  |
| C    | -3.416068      | 0.092591  | -0.978791 |
| H    | -3.466397      | -0.135881 | -3.124039 |
| H    | -5.935874      | 0.128069  | -3.241905 |
| H    | -7.239489      | 0.493778  | -1.168568 |
| H    | -6.100129      | 0.599968  | 1.028339  |
| H    | -3.621068      | 0.338702  | 1.154690  |
| C    | -2.005721      | -0.056545 | -0.872068 |
| N    | -0.864829      | -0.178963 | -0.701846 |
| Mg   | 1.304576       | -0.462479 | -0.176567 |
| C    | 1.456582       | -1.543896 | 1.738360  |
| H    | 2.134982       | -0.806013 | 2.195282  |
| H    | 2.091246       | -2.327857 | 1.291005  |
| C    | -1.396746      | 0.065714  | 2.698648  |
| H    | -2.387701      | -0.111913 | 3.141852  |
| H    | -0.734044      | 0.306994  | 3.544123  |
| H    | -1.485978      | 0.996012  | 2.113727  |
| H    | 1.015569       | -2.058569 | 2.607649  |
| Zn   | -0.734926      | -1.453451 | 1.609093  |
| C    | -1.382368      | -3.076075 | 0.688842  |
| H    | -1.360628      | -3.982420 | 1.309955  |
| H    | -2.418488      | -2.975558 | 0.333167  |
| H    | -0.773967      | -3.299222 | -0.200830 |
| O    | 1.174688       | 1.593095  | 0.217984  |
| C    | 1.260554       | 2.117864  | 1.563020  |
| C    | 0.615987       | 2.596809  | -0.642515 |

|    |           |           |           |
|----|-----------|-----------|-----------|
| C  | 0.449825  | 3.413398  | 1.558211  |
| H  | 0.842764  | 1.357871  | 2.232533  |
| H  | 2.318500  | 2.272901  | 1.811923  |
| C  | -0.347909 | 3.335751  | 0.256476  |
| H  | 1.424414  | 3.252177  | -1.002882 |
| H  | 0.162022  | 2.086400  | -1.497749 |
| H  | 1.114573  | 4.284482  | 1.541607  |
| H  | -0.187731 | 3.494173  | 2.443323  |
| H  | -0.630234 | 4.316774  | -0.134637 |
| H  | -1.260237 | 2.738390  | 0.390572  |
| O  | 3.427368  | -0.034390 | -0.031485 |
| C  | 4.375944  | -1.125097 | -0.070520 |
| C  | 3.944722  | 1.085966  | -0.779912 |
| C  | 5.411848  | -0.724711 | -1.101274 |
| H  | 4.807301  | -1.236237 | 0.933548  |
| H  | 3.839474  | -2.043658 | -0.332494 |
| C  | 5.418267  | 0.792482  | -0.966446 |
| H  | 3.418819  | 1.135512  | -1.746034 |
| H  | 3.734516  | 2.000502  | -0.215212 |
| H  | 5.073614  | -1.015102 | -2.103644 |
| H  | 6.384697  | -1.187900 | -0.915653 |
| H  | 5.836774  | 1.308003  | -1.835131 |
| H  | 5.985537  | 1.097908  | -0.078228 |
| Cl | 1.681407  | -1.346949 | -2.351664 |

#### TSc\_MeMgClZn<sub>THF</sub>2

| Atom | Coordinate (Å) |           |           |
|------|----------------|-----------|-----------|
|      | x              | y         | z         |
| C    | -3.605585      | 0.481474  | -1.804197 |
| C    | -4.942144      | 0.813182  | -1.976644 |
| C    | -5.896512      | 0.349704  | -1.074812 |
| C    | -5.511843      | -0.447004 | 0.000302  |
| C    | -4.178019      | -0.793735 | 0.169611  |
| C    | -3.220587      | -0.334631 | -0.733642 |
| H    | -2.844569      | 0.843401  | -2.491899 |
| H    | -5.239629      | 1.436872  | -2.815585 |
| H    | -6.942998      | 0.611784  | -1.209096 |
| H    | -6.254975      | -0.802441 | 0.709147  |
| H    | -3.863564      | -1.413842 | 1.005240  |
| C    | -1.790304      | -0.593894 | -0.591967 |
| N    | -0.734186      | -0.170234 | -0.969453 |
| Mg   | 1.318814       | -0.383914 | -0.398851 |
| C    | 1.074411       | -1.641433 | 1.535259  |
| H    | 1.840297       | -1.037599 | 2.040469  |
| H    | 1.585432       | -2.323709 | 0.832608  |
| C    | -1.754880      | 0.296838  | 2.628916  |
| H    | -2.634434      | -0.118949 | 3.138949  |
| H    | -1.087631      | 0.679622  | 3.413650  |
| H    | -2.114920      | 1.171362  | 2.065602  |
| H    | 0.741363       | -2.350792 | 2.308218  |
| Zn   | -0.886285      | -1.012038 | 1.432872  |
| C    | -1.688531      | -2.624424 | 0.318639  |
| H    | -1.860440      | -3.191077 | 1.251677  |
| H    | -2.554136      | -2.838117 | -0.312857 |
| H    | -0.797265      | -3.027884 | -0.177298 |
| O    | 1.225530       | 1.677383  | 0.004268  |
| C    | 1.039207       | 2.158543  | 1.357458  |
| C    | 0.617768       | 2.600691  | -0.917067 |
| C    | 0.087570       | 3.346810  | 1.251331  |
| H    | 0.612494       | 1.333057  | 1.942799  |
| H    | 2.019564       | 2.422160  | 1.773519  |
| C    | -0.536898      | 3.178824  | -0.132828 |
| H    | 1.359604       | 3.365910  | -1.191195 |
| H    | 0.326268       | 2.037188  | -1.808846 |
| H    | 0.641963       | 4.290991  | 1.303670  |
| H    | -0.651367      | 3.343907  | 2.058198  |

|    |           |           |           |
|----|-----------|-----------|-----------|
| H  | -0.912154 | 4.116084  | -0.552304 |
| H  | -1.357853 | 2.448598  | -0.109285 |
| O  | 3.363721  | -0.073572 | 0.214091  |
| C  | 4.250124  | -1.205919 | 0.389016  |
| C  | 4.081329  | 1.005353  | -0.431071 |
| C  | 5.488518  | -0.879413 | -0.418910 |
| H  | 4.465944  | -1.304654 | 1.461239  |
| H  | 3.734286  | -2.107604 | 0.042205  |
| C  | 5.544207  | 0.638269  | -0.307214 |
| H  | 3.766189  | 1.050319  | -1.484942 |
| H  | 3.802709  | 1.941896  | 0.061041  |
| H  | 5.342058  | -1.179331 | -1.464031 |
| H  | 6.379704  | -1.382962 | -0.034807 |
| H  | 6.155995  | 1.112896  | -1.079107 |
| H  | 5.933461  | 0.938477  | 0.673787  |
| Cl | 2.073511  | -1.460690 | -2.357911 |

**PRc MeMgClZn<sub>THF</sub>2**

| Atom | Coordinate (Å) |           |           |
|------|----------------|-----------|-----------|
|      | x              | y         | z         |
| C    | 2.291138       | -2.109548 | -0.656491 |
| C    | 2.862916       | -3.306318 | -0.244538 |
| C    | 4.080275       | -3.305940 | 0.432918  |
| C    | 4.725657       | -2.099793 | 0.683904  |
| C    | 4.160764       | -0.902716 | 0.255183  |
| C    | 2.929980       | -0.889006 | -0.411107 |
| H    | 1.340844       | -2.110092 | -1.188080 |
| H    | 2.357326       | -4.245570 | -0.457909 |
| H    | 4.525983       | -4.242838 | 0.758846  |
| H    | 5.675962       | -2.088892 | 1.212744  |
| H    | 4.682575       | 0.030311  | 0.456884  |
| C    | 2.282804       | 0.397769  | -0.826913 |
| N    | 1.020825       | 0.519780  | -0.924987 |
| Mg   | -0.932035      | -0.178277 | -0.609856 |
| C    | -1.833541      | -1.753885 | -1.636484 |
| H    | -2.640509      | 2.033307  | -0.946721 |
| H    | -2.193873      | 0.882560  | -2.210906 |
| C    | 0.690262       | 3.982508  | -0.327083 |
| H    | 1.187133       | 4.612399  | -1.077654 |
| H    | -0.124887      | 4.582165  | 0.099740  |
| H    | 1.426900       | 3.829417  | 0.475249  |
| H    | -1.831517      | 2.537015  | -2.409104 |
| Zn   | 0.075491       | 2.266320  | -1.061354 |
| C    | 3.239171       | 1.542237  | -1.085634 |
| H    | 2.707307       | 2.371392  | -1.559216 |
| H    | 3.666839       | 1.918075  | -0.145628 |
| H    | 4.080073       | 1.236571  | -1.719282 |
| O    | -0.638687      | 0.335091  | 1.428303  |
| C    | -1.071612      | 1.573107  | 2.033624  |
| C    | 0.453847       | -0.200262 | 2.192333  |
| C    | 0.010831       | 1.947025  | 3.046535  |
| H    | -1.173907      | 2.312226  | 1.227878  |
| H    | -2.057184      | 1.420514  | 2.491530  |
| C    | 1.179361       | 1.029891  | 2.684307  |
| H    | 0.047144       | -0.798878 | 3.022607  |
| H    | 1.038340       | -0.847920 | 1.529914  |
| H    | -0.330837      | 1.737569  | 4.066517  |
| H    | 0.268160       | 3.008702  | 2.991288  |
| H    | 1.844191       | 0.826346  | 3.527991  |
| H    | 1.772927       | 1.454383  | 1.862820  |
| O    | -2.941747      | -0.470232 | 0.207132  |
| C    | -4.084603      | -0.639330 | -0.663625 |
| C    | -3.029622      | -1.405672 | 1.305243  |
| C    | -4.767165      | -1.909959 | -0.199986 |
| H    | -4.729436      | 0.242831  | -0.552574 |
| H    | -3.727405      | -0.695016 | -1.697322 |

|    |           |           |           |
|----|-----------|-----------|-----------|
| C  | -4.458221 | -1.906072 | 1.291286  |
| H  | -2.314526 | -2.223467 | 1.122500  |
| H  | -2.742047 | -0.885066 | 2.224009  |
| H  | -4.304670 | -2.780060 | -0.682183 |
| H  | -5.836528 | -1.914263 | -0.428011 |
| H  | -4.557703 | -2.887591 | 1.762696  |
| H  | -5.114810 | -1.202916 | 1.819075  |
| Cl | -1.205761 | -2.225392 | -1.780484 |

**RC Me<sub>2</sub>MgZn**

| Atom | Coordinate (Å) |           |           |
|------|----------------|-----------|-----------|
|      | x              | y         | z         |
| C    | -2.533922      | -0.627953 | 0.135523  |
| C    | -2.298554      | 0.737519  | -0.076867 |
| C    | -3.355362      | 1.643421  | -0.227219 |
| C    | -4.657388      | 1.171572  | -0.165102 |
| C    | -4.898951      | -0.184554 | 0.044291  |
| C    | -3.843149      | -1.080837 | 0.194133  |
| H    | -1.692687      | -1.310918 | 0.245330  |
| H    | -3.148421      | 2.697245  | -0.389477 |
| H    | -5.487274      | 1.862451  | -0.280318 |
| H    | -5.922374      | -0.547092 | 0.090752  |
| H    | -4.041003      | -2.136268 | 0.356087  |
| C    | -0.949971      | 1.186408  | -0.132670 |
| N    | 0.164193       | 1.509928  | -0.167617 |
| Mg   | 2.327364       | 1.186256  | 0.111038  |
| C    | 2.579657       | -0.322572 | -1.639004 |
| H    | 2.534286       | -1.192896 | -2.304124 |
| H    | 2.068921       | 0.467395  | -2.213785 |
| H    | 3.647517       | -0.054075 | -1.608963 |
| Zn   | 1.666679       | -1.245583 | -0.022651 |
| C    | 1.767043       | -0.303787 | 1.839156  |
| H    | 0.723865       | -0.387577 | 2.177588  |
| H    | 2.331582       | -1.075217 | 2.382623  |
| H    | 2.129425       | 0.632985  | 2.300797  |
| C    | 0.486333       | -2.815777 | -0.161073 |
| H    | -0.116693      | -2.981358 | 0.743263  |
| H    | -0.214735      | -2.724505 | -1.002894 |
| H    | 1.040465       | -3.748692 | -0.332750 |
| C    | 3.614819       | 2.846506  | 0.163827  |
| H    | 3.582964       | 3.414829  | -0.778026 |
| H    | 3.351687       | 3.560492  | 0.958748  |
| H    | 4.671058       | 2.586436  | 0.325582  |

**TS Me<sub>2</sub>MgZn**

| Atom | Coordinate (Å) |           |           |
|------|----------------|-----------|-----------|
|      | x              | y         | z         |
| C    | -2.473359      | -0.602496 | 0.400289  |
| C    | -1.782056      | 0.581432  | 0.145149  |
| C    | -2.480695      | 1.730089  | -0.245840 |
| C    | -3.863160      | 1.691820  | -0.360915 |
| C    | -4.550821      | 0.508750  | -0.103849 |
| C    | -3.854649      | -0.637563 | 0.270760  |
| H    | -1.916532      | -1.490048 | 0.689710  |
| H    | -1.926974      | 2.642394  | -0.452937 |
| H    | -4.404958      | 2.586685  | -0.655335 |
| H    | -5.633456      | 0.479294  | -0.197172 |
| H    | -4.390718      | -1.562518 | 0.465081  |
| C    | -0.327953      | 0.687365  | 0.193947  |
| N    | 0.567737       | 1.391913  | -0.181669 |
| Mg   | 2.644826       | 1.121578  | -0.187979 |
| C    | 2.990213       | -1.072466 | 0.270873  |
| H    | 3.432573       | -0.641202 | 1.185758  |
| H    | 2.934266       | -2.143656 | 0.515674  |
| H    | 3.759835       | -1.041217 | -0.515438 |
| Zn   | 0.951148       | -1.191468 | -0.081317 |

|   |           |           |           |
|---|-----------|-----------|-----------|
| C | 0.246474  | -0.709477 | 1.853515  |
| H | -0.668807 | -0.341044 | 2.322777  |
| H | 0.311347  | -1.773391 | 2.144615  |
| H | 1.094430  | -0.176837 | 2.300864  |
| C | 0.087739  | -2.128685 | -1.582275 |
| H | -0.540692 | -1.454437 | -2.179812 |
| H | 0.807427  | -2.589937 | -2.270321 |
| H | -0.573463 | -2.932296 | -1.230344 |
| C | 4.281574  | 2.432768  | -0.137240 |
| H | 5.194937  | 1.954234  | 0.244302  |
| H | 4.534829  | 2.829550  | -1.131073 |
| H | 4.099585  | 3.306920  | 0.504128  |

### PR\_Me<sub>2</sub>MgZn

| Atom | Coordinate (Å) |           |           |
|------|----------------|-----------|-----------|
|      | x              | y         | z         |
| C    | 2.959543       | 1.502950  | -0.243632 |
| C    | 1.825275       | 0.741925  | 0.064312  |
| C    | 2.013905       | -0.574349 | 0.496166  |
| C    | 3.283355       | -1.122208 | 0.603827  |
| C    | 4.401700       | -0.356018 | 0.283752  |
| C    | 4.234750       | 0.957829  | -0.140367 |
| H    | 2.854221       | 2.531469  | -0.579241 |
| H    | 1.138745       | -1.171017 | 0.735362  |
| H    | 3.401910       | -2.149057 | 0.941976  |
| H    | 5.398916       | -0.781147 | 0.367907  |
| H    | 5.101425       | 1.564169  | -0.392562 |
| C    | 0.441606       | 1.303803  | -0.063523 |
| N    | -0.606236      | 0.582039  | -0.034742 |
| Mg   | -2.631396      | 0.872411  | 0.061797  |
| C    | -3.007014      | -1.309353 | 0.799236  |
| H    | -3.906200      | -1.410111 | 0.172577  |
| H    | -2.866998      | -2.313147 | 1.221622  |
| H    | -3.305919      | -0.717688 | 1.683306  |
| Zn   | -1.124502      | -1.343638 | -0.089690 |
| C    | 0.360361       | 2.804026  | -0.237113 |
| H    | 0.792468       | 3.112407  | -1.197622 |
| H    | -0.683338      | 3.129778  | -0.216877 |
| H    | 0.914229       | 3.335535  | 0.546261  |
| C    | -0.222126      | -2.793361 | -1.055654 |
| H    | -0.912289      | -3.433497 | -1.618644 |
| H    | 0.517059       | -2.401936 | -1.767267 |
| H    | 0.333005       | -3.450093 | -0.371283 |
| C    | -4.019880      | 2.445314  | -0.035539 |
| H    | -3.716029      | 3.271482  | 0.624598  |
| H    | -4.091606      | 2.871660  | -1.046603 |
| H    | -5.042992      | 2.173795  | 0.260030  |

### RCa\_Me<sub>2</sub>MgZn<sub>THF</sub>1

| Atom | Coordinate (Å) |           |           |
|------|----------------|-----------|-----------|
|      | X              | y         | z         |
| C    | -3.549914      | 0.138758  | -0.258237 |
| C    | -2.698190      | 1.192281  | 0.102631  |
| C    | -3.194292      | 2.479180  | 0.343134  |
| C    | -4.556221      | 2.707037  | 0.219922  |
| C    | -5.408954      | 1.664488  | -0.137133 |
| C    | -4.909207      | 0.386472  | -0.375693 |
| H    | -3.130992      | -0.848657 | -0.445274 |
| H    | -2.515692      | 3.279655  | 0.623262  |
| H    | -4.955583      | 3.700006  | 0.403985  |
| H    | -6.475527      | 1.850872  | -0.230481 |
| H    | -5.581070      | -0.419961 | -0.654346 |
| C    | -1.308804      | 0.916714  | 0.234634  |
| N    | -0.188150      | 0.634038  | 0.341334  |
| Mg   | 1.630642       | -0.565518 | 0.708210  |
| C    | 1.749357       | -2.128938 | -0.906768 |

|    |           |           |           |
|----|-----------|-----------|-----------|
| H  | 2.793270  | -2.145114 | -0.544286 |
| H  | 1.565525  | -3.191007 | -1.133869 |
| H  | 1.774102  | -1.620489 | -1.880818 |
| Zn | -0.261566 | -2.233168 | -0.158972 |
| C  | -0.559868 | -2.177333 | 1.810063  |
| H  | -1.587823 | -1.842549 | 2.012472  |
| H  | -0.472584 | -3.187435 | 2.234669  |
| H  | 0.087356  | -1.545905 | 2.437203  |
| C  | -1.419971 | -2.375268 | -1.758058 |
| H  | -2.431307 | -2.766867 | -1.579185 |
| H  | -1.549913 | -1.394751 | -2.242317 |
| H  | -0.969120 | -3.025645 | -2.521690 |
| O  | 2.699908  | 0.830858  | -0.511593 |
| C  | 2.535164  | 2.236144  | -0.223330 |
| C  | 4.087279  | 0.554144  | -0.810045 |
| C  | 3.781871  | 2.896407  | -0.771078 |
| H  | 1.602287  | 2.567740  | -0.688567 |
| H  | 2.456442  | 2.364845  | 0.867488  |
| C  | 4.835677  | 1.833251  | -0.487848 |
| H  | 4.415005  | -0.301475 | -0.206853 |
| H  | 4.158400  | 0.284803  | -1.871848 |
| H  | 3.989315  | 3.856757  | -0.291587 |
| H  | 3.683120  | 3.063439  | -1.850816 |
| H  | 5.116540  | 1.851888  | 0.572893  |
| H  | 5.744754  | 1.943670  | -1.084911 |
| C  | 2.600536  | -0.223665 | 2.559173  |
| H  | 2.049427  | 0.528904  | 3.148122  |
| H  | 2.708806  | -1.093726 | 3.223944  |
| H  | 3.615526  | 0.189107  | 2.428650  |

### TSA\_Me<sub>2</sub>MgZn<sub>THF</sub>1

| Atom | Coordinate (Å) |           |           |
|------|----------------|-----------|-----------|
|      | x              | y         | z         |
| C    | -3.240486      | 0.022123  | -0.656024 |
| C    | -2.538984      | 0.024624  | 0.549210  |
| C    | -3.085323      | 0.649974  | 1.675812  |
| C    | -4.333614      | 1.251708  | 1.595317  |
| C    | -5.030273      | 1.251065  | 0.389981  |
| C    | -4.479496      | 0.642638  | -0.735182 |
| H    | -2.797717      | -0.458457 | -1.525154 |
| H    | -2.522748      | 0.650982  | 2.606147  |
| H    | -4.762021      | 1.725116  | 2.474832  |
| H    | -6.005829      | 1.726531  | 0.326693  |
| H    | -5.020213      | 0.647988  | -1.677788 |
| C    | -1.199470      | -0.536086 | 0.696359  |
| N    | -0.219298      | -0.425997 | 1.377265  |
| Mg   | 1.787413       | -1.035414 | 1.142935  |
| C    | 1.783851       | -2.147973 | -0.888136 |
| H    | 1.762945       | -3.049893 | -0.255241 |
| H    | 1.673738       | -2.549032 | -1.907229 |
| O    | 2.436424       | 0.855942  | 0.529296  |
| C    | 1.695755       | 2.097681  | 0.626465  |
| C    | 3.569575       | 1.020534  | -0.349358 |
| H    | 0.634824       | 1.879749  | 0.464141  |
| H    | 1.829155       | 2.490038  | 1.642591  |
| C    | 2.307851       | 3.002457  | -0.423786 |
| C    | 3.752974       | 2.518218  | -0.462426 |
| H    | 4.418520       | 0.486445  | 0.091326  |
| H    | 3.327185       | 0.569219  | -1.323287 |
| H    | 2.207137       | 4.060362  | -0.167426 |
| H    | 1.823039       | 2.833602  | -1.394315 |
| H    | 4.286058       | 2.803814  | -1.372952 |
| H    | 4.311633       | 2.900849  | 0.400616  |
| H    | 2.820668       | -1.772608 | -0.892293 |
| Zn   | 0.088308       | -1.014118 | -1.168724 |
| C    | -1.322326      | -2.434922 | -0.492845 |

|   |           |           |           |
|---|-----------|-----------|-----------|
| H | -2.394457 | -2.447620 | -0.285563 |
| H | -1.207294 | -2.919137 | -1.480372 |
| H | -0.809415 | -3.063288 | 0.244266  |
| C | -0.129379 | 0.581258  | -2.307990 |
| H | -0.819433 | 0.409930  | -3.145522 |
| H | -0.537768 | 1.434281  | -1.745974 |
| H | 0.820965  | 0.916329  | -2.746846 |
| C | 3.067320  | -1.936196 | 2.553654  |
| H | 4.128451  | -1.814141 | 2.284223  |
| H | 2.959175  | -1.501679 | 3.558935  |
| H | 2.911064  | -3.019043 | 2.671155  |

**PRa Me<sub>2</sub>MgZn<sub>THF</sub>1**

| Atom | Coordinate (Å) |           |           |
|------|----------------|-----------|-----------|
|      | x              | y         | z         |
| C    | 4.001671       | 0.810192  | -0.139752 |
| C    | 2.692375       | 0.320186  | -0.184934 |
| C    | 2.504627       | -1.054196 | -0.368704 |
| C    | 3.586832       | -1.915347 | -0.487747 |
| C    | 4.885373       | -1.416129 | -0.417975 |
| C    | 5.088951       | -0.051490 | -0.243035 |
| H    | 4.179478       | 1.875060  | -0.006892 |
| H    | 1.490317       | -1.442017 | -0.445893 |
| H    | 3.418226       | -2.978360 | -0.643116 |
| H    | 5.735078       | -2.088575 | -0.507597 |
| H    | 6.099476       | 0.346667  | -0.189963 |
| C    | 1.504410       | 1.224450  | -0.055275 |
| N    | 0.381099       | 0.792401  | 0.353968  |
| Mg   | -0.566477      | -0.717074 | 1.353487  |
| C    | -2.567602      | 0.667722  | 1.727384  |
| H    | -2.367638      | -0.062851 | 2.530694  |
| H    | -2.934971      | 1.535150  | 2.295600  |
| O    | -1.377548      | -1.701871 | -0.316857 |
| C    | -1.287119      | -1.222343 | -1.674156 |
| C    | -2.620970      | -2.429377 | -0.157405 |
| H    | -0.653723      | -0.328736 | -1.666476 |
| H    | -0.809461      | -1.995361 | -2.293538 |
| C    | -2.726507      | -0.996091 | -2.071655 |
| C    | -3.402437      | -2.216282 | -1.450841 |
| H    | -2.389966      | -3.480825 | 0.044000  |
| H    | -3.136793      | -2.010661 | 0.715871  |
| H    | -2.863339      | -0.931293 | -3.154370 |
| H    | -3.095302      | -0.066100 | -1.617791 |
| H    | -4.469755      | -2.071143 | -1.264205 |
| H    | -3.292091      | -3.083746 | -2.111851 |
| H    | -3.447427      | 0.279054  | 1.193635  |
| Zn   | -1.407906      | 1.683844  | 0.383879  |
| C    | 1.729914       | 2.667154  | -0.439856 |
| H    | 2.266479       | 2.760991  | -1.391522 |
| H    | 0.767475       | 3.182656  | -0.510080 |
| H    | 2.335156       | 3.180325  | 0.318879  |
| C    | -1.991901      | 2.959063  | -0.994874 |
| H    | -1.686888      | 3.994040  | -0.788471 |
| H    | -1.552710      | 2.698927  | -1.969260 |
| H    | -3.081029      | 2.973428  | -1.132332 |
| C    | -0.191486      | -2.145308 | 2.863323  |
| H    | 0.767225       | -2.666006 | 2.713286  |
| H    | -0.162640      | -1.744979 | 3.887503  |
| H    | -0.964343      | -2.931151 | 2.865775  |

**RCb Me<sub>2</sub>MgZn<sub>THF</sub>1**

| Atom | Coordinate (Å) |           |           |
|------|----------------|-----------|-----------|
|      | x              | y         | z         |
| C    | -3.446312      | 0.204304  | -0.406115 |
| C    | -2.831471      | -0.790578 | 0.366905  |
| C    | -3.525080      | -1.941921 | 0.759119  |

|    |           |           |           |
|----|-----------|-----------|-----------|
| C  | -4.846571 | -2.093557 | 0.368985  |
| C  | -5.464166 | -1.109796 | -0.400686 |
| C  | -4.768727 | 0.033919  | -0.786478 |
| H  | -2.880321 | 1.091892  | -0.684168 |
| H  | -3.027646 | -2.697627 | 1.360142  |
| H  | -5.398107 | -2.980591 | 0.666219  |
| H  | -6.500670 | -1.235932 | -0.701943 |
| H  | -5.259512 | 0.796022  | -1.384496 |
| C  | -1.474445 | -0.600793 | 0.745512  |
| N  | -0.365966 | -0.395209 | 1.018702  |
| Mg | 1.648598  | 0.373360  | 1.421137  |
| C  | 2.025554  | 2.368316  | 0.568622  |
| H  | 3.086742  | 2.057888  | 0.583238  |
| H  | 2.008935  | 3.114398  | -0.241769 |
| H  | 1.862744  | 2.958412  | 1.483664  |
| Zn | 0.243312  | 1.849917  | -0.575625 |
| C  | 0.446589  | 0.601871  | -2.102285 |
| H  | -0.510327 | 0.432266  | -2.617555 |
| H  | 1.148667  | 0.944017  | -2.876952 |
| H  | 0.800719  | -0.388140 | -1.779033 |
| C  | -1.193425 | 3.010606  | 0.150832  |
| H  | -1.977489 | 3.277812  | -0.573006 |
| H  | -1.713891 | 2.554286  | 1.007214  |
| H  | -0.789781 | 3.963628  | 0.524127  |
| O  | 2.613966  | -0.905871 | 0.091699  |
| C  | 3.494396  | -0.524250 | -0.989414 |
| C  | 2.382887  | -2.329519 | 0.075794  |
| C  | 3.586368  | -1.755444 | -1.867516 |
| H  | 3.058091  | 0.347498  | -1.487950 |
| H  | 4.467182  | -0.250565 | -0.558952 |
| C  | 3.444502  | -2.883822 | -0.851343 |
| H  | 2.442237  | -2.694212 | 1.107091  |
| H  | 1.369346  | -2.512706 | -0.310318 |
| H  | 4.520673  | -1.792614 | -2.433842 |
| H  | 2.750422  | -1.772712 | -2.578989 |
| H  | 4.386238  | -3.032005 | -0.308721 |
| H  | 3.150169  | -3.838292 | -1.295614 |
| C  | 2.245267  | -0.121303 | 3.387101  |
| H  | 3.290599  | 0.154566  | 3.596778  |
| H  | 1.646323  | 0.339423  | 4.186926  |
| H  | 2.183962  | -1.209312 | 3.554325  |

**TSb Me<sub>2</sub>MgZn<sub>THF</sub>1**

| Atom | Coordinate (Å) |           |           |
|------|----------------|-----------|-----------|
|      | x              | y         | z         |
| C    | 3.282259       | 0.078847  | -0.470822 |
| C    | 2.276226       | 0.661103  | 0.300457  |
| C    | 2.540509       | 1.818732  | 1.038488  |
| C    | 3.802446       | 2.397170  | 0.989074  |
| C    | 4.806381       | 1.812273  | 0.222928  |
| C    | 4.547053       | 0.649404  | -0.498956 |
| H    | 3.065802       | -0.828855 | -1.029711 |
| H    | 1.748251       | 2.254221  | 1.643495  |
| H    | 4.003344       | 3.303914  | 1.553672  |
| H    | 5.795075       | 2.262905  | 0.188419  |
| H    | 5.333576       | 0.187984  | -1.090191 |
| C    | 0.943569       | 0.075689  | 0.437895  |
| N    | 0.096500       | -0.061360 | 1.281659  |
| Mg   | -1.866094      | -0.797565 | 1.094665  |
| C    | -1.720841      | -2.392837 | -0.573615 |
| H    | -2.556468      | -1.759290 | -0.918714 |
| H    | -1.518595      | -3.005321 | -1.464713 |
| H    | -2.132101      | -3.112049 | 0.149026  |
| Zn   | 0.274376       | -1.893234 | -0.492481 |
| C    | 0.376023       | -0.111254 | -1.667982 |
| H    | 1.289621       | 0.282966  | -2.114901 |

|   |           |           |           |
|---|-----------|-----------|-----------|
| H | -0.097127 | -0.766119 | -2.422807 |
| H | -0.334092 | 0.705154  | -1.492511 |
| C | 1.745926  | -3.137672 | -0.076930 |
| H | 2.429802  | -3.284634 | -0.924192 |
| H | 2.360328  | -2.772108 | 0.757437  |
| H | 1.380419  | -4.132349 | 0.208957  |
| O | -2.417083 | 0.884597  | -0.041173 |
| C | -3.192401 | 0.960040  | -1.256858 |
| C | -2.141807 | 2.210057  | 0.462886  |
| C | -3.157261 | 2.423163  | -1.651231 |
| H | -2.734841 | 0.293704  | -1.997304 |
| H | -4.211386 | 0.611252  | -1.040559 |
| C | -3.087628 | 3.116686  | -0.295543 |
| H | -2.296626 | 2.199272  | 1.547507  |
| H | -1.087510 | 2.448511  | 0.257262  |
| H | -4.025505 | 2.713118  | -2.248458 |
| H | -2.252143 | 2.636156  | -2.234654 |
| H | -4.074699 | 3.125621  | 0.182535  |
| H | -2.722148 | 4.145411  | -0.349740 |
| C | -3.307071 | -1.214980 | 2.576979  |
| H | -4.274199 | -1.510125 | 2.140687  |
| H | -3.029945 | -2.022836 | 3.270112  |
| H | -3.516128 | -0.334491 | 3.204941  |

**PRb\_Me<sub>2</sub>MgZn<sub>THF</sub><sub>1</sub>**

| Atom | Coordinate (Å) |           |           |
|------|----------------|-----------|-----------|
|      | x              | y         | z         |
| C    | 2.248349       | -2.207133 | -0.475610 |
| C    | 1.290557       | -1.593564 | 0.338424  |
| C    | 1.728067       | -0.883309 | 1.461838  |
| C    | 3.080124       | -0.772157 | 1.755825  |
| C    | 4.026092       | -1.369168 | 0.923708  |
| C    | 3.605909       | -2.087155 | -0.191428 |
| H    | 1.936530       | -2.771686 | -1.352038 |
| H    | 0.986598       | -0.427876 | 2.117276  |
| H    | 3.398144       | -0.223431 | 2.639751  |
| H    | 5.085993       | -1.281240 | 1.149655  |
| H    | 4.337501       | -2.558811 | -0.843194 |
| C    | -0.171261      | -1.635900 | 0.006801  |
| N    | -0.952407      | -0.708530 | 0.383772  |
| Mg   | -0.834987      | -2.779337 | 0.869886  |
| C    | -2.826174      | 1.750995  | -0.350186 |
| H    | -2.013367      | 2.370190  | -0.771023 |
| H    | -3.570244      | 1.767559  | -1.157562 |
| H    | -3.279826      | 2.341082  | 0.459090  |
| Zn   | -2.837942      | -0.293291 | -0.096408 |
| C    | -0.631882      | -2.800253 | -0.837277 |
| H    | -0.232666      | -3.757216 | -0.480874 |
| H    | -1.725357      | -2.837738 | -0.840297 |
| H    | -0.294904      | -2.680580 | -1.876428 |
| C    | -4.305779      | -1.598888 | -0.132348 |
| H    | -4.363194      | -2.116034 | -1.100364 |
| H    | -4.167138      | -2.382263 | 0.624924  |
| H    | -5.293180      | -1.154483 | 0.045274  |
| O    | 0.608146       | 1.828513  | -0.546957 |
| C    | 0.724595       | 1.238962  | -1.861057 |
| C    | 1.879416       | 2.383870  | -0.135335 |
| C    | 2.084548       | 1.671154  | -2.373705 |
| H    | 0.658585       | 0.146587  | -1.755736 |
| H    | -0.117652      | 1.587945  | -2.468582 |
| C    | 2.891393       | 1.778680  | -1.084225 |
| H    | 1.825314       | 3.476934  | -0.228201 |
| H    | 2.040712       | 2.124244  | 0.917006  |
| H    | 2.018691       | 2.648742  | -2.866838 |
| H    | 2.499734       | 0.954724  | -3.087991 |
| H    | 3.788149       | 2.396333  | -1.182706 |

|   |           |          |           |
|---|-----------|----------|-----------|
| H | 3.192541  | 0.782886 | -0.730641 |
| C | -0.424984 | 2.381488 | 2.625204  |
| C | -0.170501 | 3.426718 | 2.385184  |
| H | -1.228676 | 2.428762 | 3.374151  |
| H | 0.454189  | 1.971229 | 3.149243  |

**RCa\_Me<sub>2</sub>MgZn<sub>THF</sub><sub>2</sub>**

| Atom | Coordinate (Å) |           |           |
|------|----------------|-----------|-----------|
|      | x              | y         | z         |
| C    | 3.563046       | -0.632776 | -1.864198 |
| C    | 4.807255       | -1.237745 | -1.772338 |
| C    | 5.070709       | -2.136357 | -0.740708 |
| C    | 4.095534       | -2.437450 | 0.207465  |
| C    | 2.844758       | -1.843392 | 0.132398  |
| C    | 2.586558       | -0.942145 | -0.909699 |
| H    | 3.339352       | 0.071368  | -2.660871 |
| H    | 5.574611       | -1.007955 | -2.505688 |
| H    | 6.048470       | -2.606151 | -0.674196 |
| H    | 4.311547       | -3.137168 | 1.009486  |
| H    | 2.064120       | -2.052627 | 0.862601  |
| C    | 1.302840       | -0.330425 | -0.976052 |
| N    | 0.248685       | 0.156009  | -1.000986 |
| Mg   | -1.685232      | 0.966325  | -0.132226 |
| C    | -1.856150      | 0.830897  | 2.115821  |
| H    | -2.913988      | 0.564371  | 1.951773  |
| H    | -1.805843      | 1.930653  | 2.168574  |
| C    | -0.520757      | -2.403157 | 1.474862  |
| H    | 0.126724       | -3.100417 | 2.029627  |
| H    | -1.553737      | -2.727999 | 1.669586  |
| H    | -0.344972      | -2.608724 | 0.407617  |
| H    | -1.681906      | 0.525873  | 3.161135  |
| Zn   | -0.189058      | -0.497695 | 1.946445  |
| C    | 1.489114       | 0.286255  | 2.696577  |
| H    | 1.319597       | 1.142155  | 3.368120  |
| H    | 2.034217       | -0.462568 | 3.292105  |
| H    | 2.213019       | 0.636103  | 1.943043  |
| O    | -0.473080      | 2.806160  | -0.071457 |
| C    | -0.177015      | 3.428463  | -1.338041 |
| C    | 0.576122       | 3.100434  | 0.869225  |
| C    | 1.087959       | 4.241296  | -1.113981 |
| H    | -0.017900      | 2.633593  | -2.081423 |
| H    | -1.041894      | 4.023263  | -1.649404 |
| C    | 1.766926       | 3.472446  | 0.013912  |
| H    | 0.259913       | 3.944768  | 1.500473  |
| H    | 0.721795       | 2.218415  | 1.498998  |
| H    | 0.839782       | 5.256161  | -0.778872 |
| H    | 1.692913       | 4.323628  | -2.021312 |
| H    | 2.513231       | 4.057792  | 0.558308  |
| H    | 2.254724       | 2.565566  | -0.372001 |
| O    | -2.435187      | -1.031862 | -0.528739 |
| C    | -3.711719      | -1.394829 | 0.023948  |
| C    | -2.226357      | -1.709366 | -1.774942 |
| C    | -4.406237      | -2.202811 | -1.056272 |
| H    | -3.533935      | -1.984117 | 0.935328  |
| H    | -4.250381      | -0.477756 | 0.293936  |
| C    | -3.223992      | -2.848410 | -1.767823 |
| H    | -2.416578      | -1.005731 | -2.601797 |
| H    | -1.179815      | -2.030033 | -1.816922 |
| H    | -4.942109      | -1.535108 | -1.743745 |
| H    | -5.122497      | -2.920309 | -0.646764 |
| H    | -3.457224      | -3.212855 | -2.772038 |
| H    | -2.831966      | -3.685815 | -1.175225 |
| C    | -3.153211      | 1.860636  | -1.400860 |
| H    | -2.754418      | 1.918903  | -2.430235 |
| H    | -4.093131      | 1.288963  | -1.488350 |
| H    | -3.444143      | 2.892898  | -1.145790 |



| <b>TSa<sub>2</sub>Me<sub>2</sub>MgZn<sub>2</sub>THF<sub>2</sub></b> |                |           |           |
|---------------------------------------------------------------------|----------------|-----------|-----------|
| Atom                                                                | Coordinate (Å) |           |           |
|                                                                     | x              | y         | z         |
| C                                                                   | 3.317358       | 0.204935  | -1.383693 |
| C                                                                   | 4.577475       | -0.249487 | -1.753028 |
| C                                                                   | 5.104755       | -1.395254 | -1.164777 |
| C                                                                   | 4.371298       | -2.087314 | -0.204285 |
| C                                                                   | 3.119860       | -1.628559 | 0.184255  |
| C                                                                   | 2.589887       | -0.480512 | -0.406603 |
| H                                                                   | 2.886121       | 1.089905  | -1.846684 |
| H                                                                   | 5.146657       | 0.290540  | -2.505283 |
| H                                                                   | 6.089428       | -1.751507 | -1.456846 |
| H                                                                   | 4.778828       | -2.987424 | 0.248524  |
| H                                                                   | 2.536797       | -2.159496 | 0.932774  |
| C                                                                   | 1.252557       | 0.011557  | -0.087668 |
| N                                                                   | 0.254635       | 0.403578  | -0.620195 |
| Mg                                                                  | -1.782721      | 0.827946  | -0.166951 |
| C                                                                   | -1.740890      | 0.397646  | -2.170118 |
| H                                                                   | -2.763040      | 0.008037  | 2.042345  |
| H                                                                   | -1.798985      | 1.496779  | 2.111937  |
| C                                                                   | 0.003874       | -2.751524 | 1.573444  |
| H                                                                   | 0.774935       | -3.146817 | 2.250800  |
| H                                                                   | -0.933962      | -3.260689 | 1.836676  |
| H                                                                   | 0.270349       | -3.100842 | 0.563697  |
| H                                                                   | -1.539095      | 0.236866  | 3.240178  |
| Zn                                                                  | -0.161502      | -0.783567 | 1.620439  |
| C                                                                   | 1.615140       | 0.336545  | 2.089907  |
| H                                                                   | 1.062711       | 0.696866  | 2.975599  |
| H                                                                   | 2.374956       | -0.378199 | 2.423194  |
| H                                                                   | 2.143953       | 1.216822  | 1.703614  |
| O                                                                   | -1.112213      | 2.905961  | 0.101736  |
| C                                                                   | -0.977928      | 3.605581  | -1.155757 |
| C                                                                   | -0.066270      | 3.325763  | 1.000143  |
| C                                                                   | 0.097619       | 4.651689  | -0.928808 |
| H                                                                   | -0.671784      | 2.879975  | -1.924313 |
| H                                                                   | -1.954950      | 4.013236  | -1.433032 |
| C                                                                   | 0.975927       | 3.974442  | 0.116244  |
| H                                                                   | -0.488428      | 4.043228  | 1.718766  |
| H                                                                   | 0.291850       | 2.446798  | 1.544134  |
| H                                                                   | -0.338639      | 5.570768  | -0.517985 |
| H                                                                   | 0.625819       | 4.908251  | -1.851180 |
| H                                                                   | 1.623597       | 4.664777  | 0.663603  |
| H                                                                   | 1.604573       | 3.203200  | -0.350578 |
| O                                                                   | -2.017985      | -1.339386 | -0.508408 |
| C                                                                   | -3.204641      | -2.013909 | -0.055334 |
| C                                                                   | -1.523367      | -1.957838 | -1.709807 |
| C                                                                   | -3.625058      | -2.897767 | -1.212533 |
| H                                                                   | -2.947730      | -2.598287 | 0.840495  |
| H                                                                   | -3.951525      | -1.256749 | 0.212834  |
| C                                                                   | -2.277522      | -3.267602 | -1.819927 |
| H                                                                   | -1.736707      | -1.289527 | -2.559179 |
| H                                                                   | -0.437462      | -2.070701 | -1.614379 |
| H                                                                   | -4.220656      | -2.319960 | -1.931691 |
| H                                                                   | -4.215601      | -3.759559 | -0.889747 |
| H                                                                   | -2.341943      | -3.628144 | -2.850228 |
| H                                                                   | -1.785902      | -4.039776 | -1.213661 |
| C                                                                   | -3.475628      | 1.355086  | -1.343929 |
| H                                                                   | -3.144803      | 1.579557  | -2.373303 |
| H                                                                   | -4.233515      | 0.560968  | -1.447222 |
| H                                                                   | -4.015668      | 2.254269  | -1.006664 |

| <b>PRa<sub>2</sub>Me<sub>2</sub>MgZn<sub>2</sub>THF<sub>2</sub></b> |                |           |          |
|---------------------------------------------------------------------|----------------|-----------|----------|
| Atom                                                                | Coordinate (Å) |           |          |
|                                                                     | x              | y         | z        |
| C                                                                   | -2.039026      | -0.709980 | 1.702267 |

|    |           |           |           |
|----|-----------|-----------|-----------|
| C  | -3.212531 | -0.477506 | 2.406142  |
| C  | -4.400929 | -1.083483 | 2.001104  |
| C  | -4.396506 | -1.936368 | 0.902556  |
| C  | -3.214474 | -2.174229 | 0.205430  |
| C  | -2.022010 | -1.547855 | 0.581808  |
| H  | -1.108451 | -0.239825 | 2.020015  |
| H  | -3.200346 | 0.175493  | 3.276570  |
| H  | -5.323050 | -0.899200 | 2.547067  |
| H  | -5.317350 | -2.419218 | 0.583571  |
| H  | -3.231153 | -2.839587 | -0.655318 |
| C  | -0.760646 | -1.704552 | -0.216606 |
| N  | 0.142769  | -0.815151 | -0.200925 |
| Mg | 0.440306  | 1.194407  | 0.192772  |
| C  | 1.596726  | 1.283854  | -2.126214 |
| H  | 1.351418  | 2.235939  | -1.620351 |
| H  | 0.917152  | 1.258576  | -2.989803 |
| C  | 3.101446  | -2.033328 | -1.655668 |
| H  | 2.926396  | -2.605835 | -2.576808 |
| H  | 4.131024  | -1.652319 | -1.717117 |
| H  | 3.087176  | -2.766639 | -0.835143 |
| H  | 2.598211  | 1.483399  | -2.533637 |
| Zn | 1.785517  | -0.597530 | -1.346390 |
| C  | -0.669438 | -2.941862 | -1.081636 |
| H  | 0.357647  | -3.055909 | -1.442485 |
| H  | -0.974491 | -3.851918 | -0.550889 |
| H  | -1.325608 | -2.847567 | -1.958499 |
| O  | -1.324662 | 1.855692  | -0.828056 |
| C  | -2.317527 | 2.588417  | -0.073422 |
| C  | -1.954588 | 1.172426  | -1.931389 |
| C  | -3.581498 | 2.528372  | -0.908310 |
| H  | -2.451826 | 2.089350  | 0.896463  |
| H  | -1.939755 | 3.600238  | 0.103005  |
| C  | -3.433157 | 1.180769  | -1.603893 |
| H  | -1.738758 | 1.728235  | -2.855141 |
| H  | -1.514203 | 0.171818  | -2.007674 |
| H  | -3.597042 | 3.340020  | -1.646584 |
| H  | -4.483185 | 2.607076  | -0.294352 |
| H  | -4.059334 | 1.074591  | -2.494137 |
| H  | -3.671703 | 0.362505  | -0.909816 |
| O  | 2.503554  | 0.341616  | 0.677142  |
| C  | 3.683025  | 1.176134  | 0.630048  |
| C  | 2.604721  | -0.593336 | 1.772413  |
| C  | 4.473598  | 0.826297  | 1.876722  |
| H  | 4.231032  | 0.931120  | -0.290506 |
| H  | 3.362180  | 2.223570  | 0.586704  |
| C  | 4.080391  | -0.629320 | 2.102084  |
| H  | 2.004507  | -0.212877 | 2.613451  |
| H  | 2.182722  | -1.544223 | 1.432428  |
| H  | 4.143721  | 1.442212  | 2.723235  |
| H  | 5.548099  | 0.977356  | 1.742392  |
| H  | 4.277404  | -0.985561 | 3.116778  |
| H  | 4.605896  | -1.283843 | 1.393845  |
| C  | 0.416793  | 2.542639  | 1.835010  |
| H  | 1.322957  | 2.483374  | 2.460729  |
| H  | 0.313155  | 3.602833  | 1.552214  |
| H  | -0.430373 | 2.334892  | 2.511341  |

| <b>RCb<sub>2</sub>Me<sub>2</sub>MgZn<sub>2</sub>THF<sub>2</sub></b> |                |           |           |
|---------------------------------------------------------------------|----------------|-----------|-----------|
| Atom                                                                | Coordinate (Å) |           |           |
|                                                                     | x              | y         | z         |
| C                                                                   | 4.290229       | 1.597639  | -0.723821 |
| C                                                                   | 5.676060       | 1.548178  | -0.734427 |
| C                                                                   | 6.332244       | 0.329928  | -0.572468 |
| C                                                                   | 5.609861       | -0.848282 | -0.398942 |
| C                                                                   | 4.223321       | -0.818388 | -0.387245 |
| C                                                                   | 3.569536       | 0.410468  | -0.551090 |

|    |           |           |           |
|----|-----------|-----------|-----------|
| H  | 3.762409  | 2.539262  | -0.847649 |
| H  | 6.247402  | 2.462044  | -0.868922 |
| H  | 7.418566  | 0.299026  | -0.581504 |
| H  | 6.129176  | -1.793832 | -0.272980 |
| H  | 3.633991  | -1.724485 | -0.257097 |
| C  | 2.145940  | 0.418920  | -0.527379 |
| N  | 0.987548  | 0.352042  | -0.483377 |
| Mg | -1.270948 | -0.260972 | -0.662172 |
| C  | -1.584102 | -1.710321 | 1.022319  |
| H  | -2.407948 | -2.112021 | 0.408197  |
| H  | -2.030624 | -1.000720 | 1.737683  |
| C  | 1.254190  | -3.030498 | -0.574103 |
| H  | 2.131457  | -3.629283 | -0.285689 |
| H  | 0.506144  | -3.751867 | -0.934629 |
| H  | 1.557789  | -2.451157 | -1.459568 |
| H  | -1.307818 | -2.571137 | 1.653097  |
| Zn | 0.564894  | -1.883689 | 0.893462  |
| C  | 1.268776  | -1.161121 | 2.606604  |
| H  | 0.467688  | -0.787757 | 3.263959  |
| H  | 1.817581  | -1.908627 | 3.198054  |
| H  | 1.968282  | -0.321441 | 2.472019  |
| O  | -1.411556 | 1.617552  | 0.320918  |
| C  | -1.422285 | 2.780958  | -0.530202 |
| C  | -0.779205 | 1.928516  | 1.581234  |
| C  | -1.102324 | 3.940856  | 0.389793  |
| H  | -0.649684 | 2.657799  | -1.305006 |
| H  | -2.403161 | 2.835837  | -1.015074 |
| C  | -0.141207 | 3.287796  | 1.376908  |
| H  | -1.560027 | 1.954647  | 2.355103  |
| H  | -0.067151 | 1.130717  | 1.821999  |
| H  | -2.008580 | 4.281503  | 0.906057  |
| H  | -0.672053 | 4.791052  | -0.146059 |
| H  | -0.028510 | 3.841201  | 2.312954  |
| H  | 0.851849  | 3.173797  | 0.921850  |
| O  | -3.476580 | 0.037018  | -0.658247 |
| C  | -4.273827 | -0.841301 | -1.476915 |
| C  | -4.254179 | 0.503190  | 0.458244  |
| C  | -5.689839 | -0.716393 | -0.946621 |
| H  | -4.152720 | -0.544082 | -2.523175 |
| H  | -3.892396 | -1.868140 | -1.363906 |
| C  | -5.442158 | -0.432949 | 0.529802  |
| H  | -3.621365 | 0.492992  | 1.351606  |
| H  | -4.564806 | 1.541135  | 0.265397  |
| H  | -6.283112 | -1.616448 | -1.129647 |
| H  | -6.202997 | 0.132689  | -1.415548 |
| H  | -5.160850 | -1.355983 | 1.054286  |
| H  | -6.298829 | 0.009718  | 1.045447  |
| C  | -1.198332 | -0.427042 | -2.787881 |
| H  | -1.714366 | -1.310015 | -3.199514 |
| H  | -1.688357 | 0.442761  | -3.261687 |
| H  | -0.176368 | -0.458645 | -3.198439 |

| <b>TSb<sub>2</sub>Me<sub>2</sub>MgZn<sub>2</sub>THF<sub>2</sub></b> |                |           |          |
|---------------------------------------------------------------------|----------------|-----------|----------|
| Atom                                                                | Coordinate (Å) |           |          |
|                                                                     | x              | y         | z        |
| C                                                                   | -3.703554      | 1.608129  | 0.099557 |
| C                                                                   | -5.035756      | 1.994454  | 0.187356 |
| C                                                                   | -6.033618      | 1.030707  | 0.294432 |
| C                                                                   | -5.700573      | -0.322204 | 0.308135 |
| C                                                                   | -4.373422      | -0.715216 | 0.200505 |
| C                                                                   | -3.372411      | 0.251984  | 0.102762 |
| H                                                                   | -2.909406      | 2.349104  | 0.028487 |
| H                                                                   | -5.294220      | 3.050222  | 0.176529 |
| H                                                                   | -7.075127      | 1.333557  | 0.367249 |
| H                                                                   | -6.480227      | -1.074251 | 0.397072 |
| H                                                                   | -4.098826      | -1.768381 | 0.198430 |

|    |           |           |           |
|----|-----------|-----------|-----------|
| C  | -1.957206 | -0.103452 | 0.062709  |
| N  | -0.932752 | 0.121107  | 0.643197  |
| Mg | 1.206915  | -0.262946 | 0.731026  |
| C  | 1.065267  | -1.482544 | -1.359852 |
| H  | 2.072880  | -1.729551 | -0.995615 |
| H  | 1.113841  | -0.494762 | -1.848151 |
| C  | -1.343210 | -3.453140 | 0.699803  |
| H  | -2.102183 | -4.081110 | 0.213169  |
| H  | -0.545788 | -4.124947 | 1.043354  |
| H  | -1.812581 | -3.044039 | 1.606675  |
| H  | 0.918829  | -2.781581 | -2.195860 |
| Zn | -0.692680 | -2.000026 | -0.461518 |
| C  | -2.016910 | -1.101287 | -1.904889 |
| H  | -1.468146 | -1.773209 | -2.587822 |
| H  | -3.070893 | -1.385150 | -1.941444 |
| H  | -1.906052 | -0.095016 | -2.329286 |
| O  | 1.381583  | 1.743569  | 0.050655  |
| C  | 1.790811  | 2.741075  | 1.010039  |
| C  | 0.662292  | 2.365600  | -1.033969 |
| C  | 1.685479  | 4.052449  | 0.263581  |
| H  | 1.104382  | 2.706471  | 1.869832  |
| H  | 2.799328  | 2.483802  | 1.351431  |
| C  | 0.455144  | 3.803963  | -0.601169 |
| H  | 1.284753  | 2.296424  | -1.937818 |
| H  | -0.268417 | 1.809699  | -1.197202 |
| H  | 2.573187  | 4.203067  | -0.364690 |
| H  | 1.585965  | 4.909845  | 0.934086  |
| H  | 0.368182  | 4.485609  | -1.451272 |
| H  | -0.455366 | 3.891584  | 0.005769  |
| O  | 3.371018  | -0.131573 | 0.304184  |
| C  | 4.249488  | -1.144105 | 0.836348  |
| C  | 3.967652  | 0.476624  | -0.857433 |
| C  | 5.587324  | -0.893873 | 0.171477  |
| H  | 4.252905  | -1.053416 | 1.926236  |
| H  | 3.847996  | -2.135291 | 0.572654  |
| C  | 5.154295  | -0.401024 | -1.203620 |
| H  | 3.214729  | 0.529004  | -1.651667 |
| H  | 4.273581  | 1.501448  | -0.599365 |
| H  | 6.212006  | -1.790632 | 0.140656  |
| H  | 6.139049  | -0.108537 | 0.703465  |
| H  | 4.828604  | -1.246988 | -1.823525 |
| H  | 5.933503  | 0.141293  | -1.746055 |
| C  | 1.461743  | -1.099599 | 2.671402  |
| H  | 1.828681  | -2.139427 | 2.633083  |
| H  | 2.172408  | -0.563802 | 3.323266  |
| H  | 0.511296  | -1.139866 | 3.227415  |

| <b>PRb<sub>2</sub>Me<sub>2</sub>MgZn<sub>2</sub>THF<sub>2</sub></b> |                |           |           |
|---------------------------------------------------------------------|----------------|-----------|-----------|
| Atom                                                                | Coordinate (Å) |           |           |
|                                                                     | x              | y         | z         |
| C                                                                   | 2.577168       | -0.418885 | 1.368173  |
| C                                                                   | 3.373894       | -1.499329 | 1.727026  |
| C                                                                   | 4.484121       | -1.837513 | 0.955318  |
| C                                                                   | 4.802474       | -1.074212 | -0.163873 |
| C                                                                   | 4.017173       | 0.023088  | -0.507013 |
| C                                                                   | 2.884456       | 0.353848  | 0.243647  |
| H                                                                   | 1.707592       | -0.148484 | 1.967859  |
| H                                                                   | 3.130240       | -2.078855 | 2.615144  |
| H                                                                   | 5.104117       | -2.687060 | 1.231570  |
| H                                                                   | 5.669268       | -1.328857 | -0.769393 |
| H                                                                   | 4.281673       | 0.615216  | -1.381270 |
| H                                                                   | 1.989656       | 1.494278  | -0.137853 |
| N                                                                   | 0.737338       | 1.446275  | 0.066313  |
| Mg                                                                  | -0.850234      | 0.154416  | 0.413577  |
| C                                                                   | -2.147612      | 1.562599  | -1.128041 |
| H                                                                   | -3.061268      | 1.367453  | -0.550272 |

|    |           |           |           |
|----|-----------|-----------|-----------|
| H  | -1.944371 | 0.659839  | -1.729223 |
| C  | -0.553390 | 4.731909  | -0.260978 |
| H  | -0.114072 | 5.182480  | -1.162260 |
| H  | -1.532304 | 5.206199  | -0.116733 |
| H  | 0.080545  | 5.046829  | 0.578702  |
| H  | -2.461614 | 2.290274  | -1.889406 |
| Zn | -0.652652 | 2.776200  | -0.414544 |
| C  | 2.675150  | 2.672615  | -0.789986 |
| H  | 1.981377  | 3.517409  | -0.843172 |
| H  | 3.580555  | 2.972884  | -0.249046 |
| H  | 2.984408  | 2.425578  | -1.814437 |
| O  | 0.041090  | -1.502367 | -0.534864 |
| C  | 0.251104  | -2.779159 | 0.109495  |
| C  | 0.734172  | -1.459892 | -1.800411 |
| C  | 0.799246  | -3.672108 | -0.982776 |
| H  | 0.977468  | -2.639184 | 0.923353  |
| H  | -0.705965 | -3.101578 | 0.534302  |
| C  | 1.624838  | -2.685376 | -1.810505 |
| H  | -0.017005 | -1.499568 | -2.603863 |
| H  | 1.275997  | -0.509343 | -1.862188 |
| H  | -0.019544 | -4.082662 | -1.588832 |
| H  | 1.383226  | -4.505415 | -0.583093 |
| H  | 1.847070  | -3.034986 | -2.813220 |
| H  | 2.573342  | -2.462917 | -1.293385 |
| O  | -2.575642 | -1.144908 | 0.226902  |
| C  | -3.761230 | -0.983193 | 1.043655  |
| C  | -2.908785 | -1.865208 | -0.976432 |
| C  | -4.818061 | -1.851978 | 0.391503  |
| H  | -3.506398 | -1.259681 | 2.069945  |
| H  | -4.044390 | 0.079556  | 1.031844  |
| C  | -4.416252 | -1.785613 | -1.076260 |
| H  | -2.382449 | -1.404508 | -1.819394 |
| H  | -2.561450 | -2.904838 | -0.875187 |
| H  | -5.829837 | -1.487201 | 0.587183  |
| H  | -4.749371 | -2.883602 | 0.758666  |
| H  | -4.712494 | -0.822313 | -1.512061 |
| H  | -4.838947 | -2.587154 | -1.687894 |
| C  | -1.082483 | 0.249557  | 2.528739  |
| H  | -2.054697 | 0.629452  | 2.764068  |
| H  | -0.972314 | -0.730368 | 2.944082  |
| H  | -0.337108 | 0.897382  | 2.940612  |

| <b>RCc Me<sub>2</sub>MgZn<sub>THF</sub>2</b> |                |           |           |
|----------------------------------------------|----------------|-----------|-----------|
| Atom                                         | Coordinate (Å) |           |           |
|                                              | x              | y         | z         |
| C                                            | 4.135627       | 0.502950  | 2.145554  |
| C                                            | 5.517151       | 0.623057  | 2.134485  |
| C                                            | 6.216971       | 0.526482  | 0.933712  |
| C                                            | 5.543065       | 0.310091  | -0.265980 |
| C                                            | 4.161466       | 0.189847  | -0.274550 |
| C                                            | 3.463504       | 0.287044  | 0.937271  |
| H                                            | 3.574767       | 0.571483  | 3.073228  |
| H                                            | 6.051234       | 0.790110  | 3.065328  |
| H                                            | 7.299799       | 0.619400  | 0.933591  |
| H                                            | 6.096545       | 0.233815  | -1.197384 |
| H                                            | 3.608939       | 0.017311  | -1.196671 |
| C                                            | 2.046671       | 0.152017  | 0.901086  |
| N                                            | 0.898920       | 0.021099  | 0.786094  |
| Mg                                           | -1.380682      | -0.491961 | 0.483632  |
| C                                            | -1.507397      | -1.858056 | -1.291752 |
| H                                            | -2.221933      | -1.197058 | -1.805954 |
| H                                            | -2.101180      | -2.566381 | -0.689051 |
| C                                            | 1.319689       | -0.435846 | -2.581656 |
| H                                            | 2.299780       | -0.716417 | -2.996530 |
| H                                            | 0.646129       | -0.356482 | -3.449498 |
| H                                            | 1.434651       | 0.592609  | -2.200208 |

|    |           |           |           |
|----|-----------|-----------|-----------|
| H  | -1.114425 | -2.494167 | -2.102431 |
| Zn | 0.644204  | -1.689965 | -1.191750 |
| C  | 1.380316  | -3.106993 | -0.015951 |
| H  | 1.319645  | -4.119727 | -0.439470 |
| H  | 2.439666  | -2.946454 | 0.235362  |
| H  | 0.843119  | -3.145788 | 0.944641  |
| O  | -1.320739 | 1.457384  | -0.363248 |
| C  | -1.415981 | 1.687338  | -1.786288 |
| C  | -0.767805 | 2.618960  | 0.267226  |
| C  | -0.665127 | 2.990514  | -2.051923 |
| H  | -0.956164 | 0.826414  | -2.284824 |
| H  | -2.477226 | 1.735983  | -2.063353 |
| C  | 0.159379  | 3.190492  | -0.781382 |
| H  | -1.581831 | 3.318896  | 0.515675  |
| H  | -0.279299 | 2.296407  | 1.192452  |
| H  | -1.366616 | 3.823072  | -2.180694 |
| H  | -0.050169 | 2.926173  | -2.954446 |
| H  | 0.422661  | 4.235555  | -0.596829 |
| H  | 1.083801  | 2.597950  | -0.819054 |
| O  | -3.566789 | -0.111395 | 0.156806  |
| C  | -4.472205 | -1.200802 | 0.423484  |
| C  | -4.075210 | 1.095849  | 0.750245  |
| C  | -5.507954 | -0.652833 | 1.388541  |
| H  | -4.918132 | -1.516299 | -0.529741 |
| H  | -3.899665 | -2.039267 | 0.838356  |
| C  | -5.541548 | 0.822693  | 1.011037  |
| H  | -3.529177 | 1.288429  | 1.688701  |
| H  | -3.884092 | 1.923652  | 0.058767  |
| H  | -5.160630 | -0.769154 | 2.423248  |
| H  | -6.474368 | -1.155501 | 1.293553  |
| H  | -5.955232 | 1.466532  | 1.792199  |
| H  | -6.126656 | 0.972681  | 0.094884  |
| C  | -1.643264 | -0.870608 | 2.567340  |
| H  | -2.617090 | -1.302933 | 2.851986  |
| H  | -0.877349 | -1.531719 | 3.004173  |
| H  | -1.563731 | 0.074588  | 3.134788  |

| <b>TSc Me<sub>2</sub>MgZn<sub>THF</sub>2</b> |                |           |           |
|----------------------------------------------|----------------|-----------|-----------|
| Atom                                         | Coordinate (Å) |           |           |
|                                              | x              | y         | z         |
| C                                            | -3.601677      | 0.804077  | -1.677595 |
| C                                            | -4.931255      | 1.199509  | -1.727806 |
| C                                            | -5.863663      | 0.616936  | -0.873202 |
| C                                            | -5.463434      | -0.362611 | 0.031561  |
| C                                            | -4.137195      | -0.771629 | 0.076042  |
| C                                            | -3.201532      | -0.193520 | -0.780551 |
| H                                            | -2.856971      | 1.257054  | -2.328380 |
| H                                            | -5.240237      | 1.966435  | -2.433418 |
| H                                            | -6.904365      | 0.929160  | -0.910757 |
| H                                            | -6.188696      | -0.811895 | 0.704888  |
| H                                            | -3.809646      | -1.533660 | 0.778473  |
| C                                            | -1.776671      | -0.514122 | -0.750637 |
| N                                            | -0.719326      | -0.073562 | -1.101866 |
| Mg                                           | 1.402098       | -0.425629 | -0.728969 |
| C                                            | 1.120435       | -2.001368 | 1.048383  |
| H                                            | 1.956838       | -1.488170 | 1.542038  |
| H                                            | 1.519604       | -2.567506 | 0.188589  |
| C                                            | -1.590633      | -0.142171 | 2.537901  |
| H                                            | -2.474543      | -0.607107 | 2.996113  |
| H                                            | -0.896605      | 0.087832  | 3.358858  |
| H                                            | -1.931407      | 0.824279  | 2.134828  |
| H                                            | 0.854699       | -2.810414 | 1.745933  |
| Zn                                           | -0.779726      | -1.265122 | 1.122883  |
| C                                            | -1.716262      | -2.673795 | -0.169728 |
| H                                            | -1.869352      | -3.374332 | 0.670750  |
| H                                            | -2.612816      | -2.761426 | -0.789075 |

|   |           |           |           |
|---|-----------|-----------|-----------|
| H | -0.859939 | -3.021465 | -0.761482 |
| O | 1.290325  | 1.527562  | 0.129141  |
| C | 1.233454  | 1.780065  | 1.549386  |
| C | 0.672950  | 2.620932  | -0.564078 |
| C | 0.262848  | 2.947379  | 1.733192  |
| H | 0.881926  | 0.859400  | 2.031058  |
| H | 2.245632  | 2.005215  | 1.909999  |
| C | -0.426741 | 3.062463  | 0.373815  |
| H | 1.422643  | 3.411900  | -0.725803 |
| H | 0.322590  | 2.244276  | -1.530486 |
| H | 0.808629  | 3.870151  | 1.961194  |
| H | -0.440774 | 2.760463  | 2.550258  |
| H | -0.793444 | 4.070402  | 0.161178  |
| H | -1.266593 | 2.358128  | 0.298474  |
| O | 3.471865  | -0.136046 | 0.085191  |
| C | 4.371417  | -1.264613 | 0.095017  |
| C | 4.148381  | 1.013227  | -0.464479 |
| C | 5.577223  | -0.837023 | -0.718032 |
| H | 4.636079  | -1.484732 | 1.138612  |
| H | 3.848600  | -2.131172 | -0.325421 |
| C | 5.620879  | 0.660349  | -0.443233 |
| H | 3.789022  | 1.174439  | -1.493740 |
| H | 3.884044  | 1.889152  | 0.136666  |
| H | 5.397665  | -1.021538 | -1.785214 |
| H | 6.487580  | -1.367287 | -0.425268 |
| H | 6.195504  | 1.226658  | -1.181381 |
| H | 6.047375  | 0.856128  | 0.548712  |
| C | 2.125572  | -1.074767 | -2.620594 |
| H | 3.104498  | -1.581673 | -2.583098 |
| H | 1.443699  | -1.770034 | -3.136627 |
| H | 2.258534  | -0.230555 | -3.319088 |

#### PRc Me<sub>2</sub>MgZn<sub>THF</sub><sub>2</sub>

| Atom | Coordinate (Å) |           |           |
|------|----------------|-----------|-----------|
|      | x              | y         | z         |
| C    | 2.367869       | -2.036795 | -0.445101 |
| C    | 3.018261       | -3.215185 | -0.105334 |
| C    | 4.350247       | -3.188965 | 0.302701  |
| C    | 5.024584       | -1.974329 | 0.358053  |
| C    | 4.373843       | -0.795900 | 0.004962  |
| C    | 3.032423       | -0.805230 | -0.394638 |
| H    | 1.329649       | -2.057775 | -0.772371 |
| H    | 2.484208       | -4.161379 | -0.164180 |
| H    | 4.860070       | -4.111261 | 0.571390  |
| H    | 6.064666       | -1.941347 | 0.674574  |
| H    | 4.923427       | 0.141146  | 0.051900  |
| C    | 2.301816       | 0.459649  | -0.747015 |
| N    | 1.034552       | 0.509856  | -0.824280 |
| Mg   | -0.888976      | -0.392303 | -0.743192 |
| C    | -1.823373      | 1.622420  | -1.797837 |
| H    | -2.707855      | 1.803374  | -1.173074 |
| H    | -2.044413      | 0.727985  | -2.405957 |
| C    | 0.440882       | 3.904656  | -0.150563 |
| H    | 0.917145       | 4.597855  | -0.858253 |
| H    | -0.426851      | 4.432627  | 0.268397  |
| H    | 1.160347       | 3.772790  | 0.671407  |
| H    | -1.833155      | 2.419958  | -2.555775 |
| Zn   | -0.031904      | 2.180668  | -0.978935 |
| C    | 3.180528       | 1.672528  | -0.973450 |
| H    | 2.570981       | 2.496673  | -1.353279 |
| H    | 3.647700       | 2.004530  | -0.035646 |
| H    | 3.992441       | 1.467711  | -1.681829 |
| O    | -0.838250      | 0.209205  | 1.331403  |
| C    | -1.425625      | 1.393219  | 1.907352  |
| C    | 0.225098       | -0.240138 | 2.182205  |
| C    | -0.452985      | 1.868664  | 2.988329  |

|   |           |           |           |
|---|-----------|-----------|-----------|
| H | -1.551789 | 2.121962  | 1.096399  |
| H | -2.418182 | 1.144190  | 2.305224  |
| C | 0.807408  | 1.039783  | 2.736502  |
| H | -0.197036 | -0.878391 | 2.975262  |
| H | 0.915966  | -0.829657 | 1.569286  |
| H | -0.854883 | 1.656066  | 3.985460  |
| H | -0.270575 | 2.945383  | 2.922374  |
| H | 1.405608  | 0.882910  | 3.638226  |
| H | 1.440085  | 1.510065  | 1.971710  |
| O | -3.036107 | -0.661017 | -0.028805 |
| C | -4.073378 | -0.907870 | -0.997313 |
| C | -3.146330 | -1.612920 | 1.047728  |
| C | -4.656831 | -2.259483 | -0.637728 |
| H | -4.820094 | -0.104783 | -0.920324 |
| H | -3.628289 | -0.877236 | -1.998287 |
| C | -4.504249 | -2.264251 | 0.877544  |
| H | -2.332237 | -2.349054 | 0.949586  |
| H | -3.018690 | -1.081213 | 1.996988  |
| H | -4.052174 | -3.060618 | -1.082748 |
| H | -5.689318 | -2.375078 | -0.978897 |
| H | -4.545631 | -3.262818 | 1.321400  |
| H | -5.285351 | -1.649405 | 1.342431  |
| C | -0.978535 | -2.313335 | -1.678173 |
| H | -0.885263 | -3.134916 | -0.945096 |
| H | -1.942317 | -2.486638 | -2.186858 |
| H | -0.200302 | -2.509673 | -2.433242 |

#### RC MgCl<sub>2</sub>Zn

| Atom | Coordinate (Å) |           |           |
|------|----------------|-----------|-----------|
|      | x              | y         | z         |
| C    | -3.057270      | -0.517845 | -0.657811 |
| C    | -2.596832      | 0.653400  | -0.039202 |
| C    | -3.480846      | 1.562159  | 0.557035  |
| C    | -4.839072      | 1.289559  | 0.528005  |
| C    | -5.304591      | 0.129282  | -0.087414 |
| C    | -4.419720      | -0.771145 | -0.677118 |
| H    | -2.345418      | -1.203506 | -1.113047 |
| H    | -3.098552      | 2.461969  | 1.029810  |
| H    | -5.537812      | 1.983721  | 0.984957  |
| H    | -6.371536      | -0.075380 | -0.108127 |
| H    | -4.793920      | -1.671559 | -1.154639 |
| C    | -1.201860      | 0.909785  | -0.032188 |
| N    | -0.056945      | 1.089006  | -0.045188 |
| Mg   | 2.063538       | 1.208762  | -0.155214 |
| Cl   | 2.661448       | 3.420487  | -0.117419 |
| Zn   | 0.986062       | -1.887609 | 0.289650  |
| C    | 1.211337       | -1.601997 | 2.186758  |
| H    | 0.364808       | -1.977699 | 2.774849  |
| H    | 2.113052       | -2.099433 | 2.566003  |
| H    | 1.317453       | -0.536501 | 2.437932  |
| C    | 0.338826       | -2.180064 | -1.506995 |
| H    | -0.577112      | -2.784795 | -1.544455 |
| H    | 0.119367       | -1.232162 | -2.018930 |
| H    | 1.079874       | -2.696663 | -2.130333 |
| Cl   | 3.449390       | -0.626765 | -0.462643 |

#### TS MgCl<sub>2</sub>Zn

| Atom | Coordinate (Å) |           |           |
|------|----------------|-----------|-----------|
|      | x              | y         | z         |
| C    | -2.899941      | -0.200094 | 0.330119  |
| C    | -1.967844      | 0.815880  | 0.119682  |
| C    | -2.402689      | 2.092407  | -0.252240 |
| C    | -3.760016      | 2.348468  | -0.388380 |
| C    | -4.687023      | 1.330978  | -0.177558 |
| C    | -4.255093      | 0.055379  | 0.174403  |
| H    | -2.559956      | -1.195386 | 0.606609  |

|    |           |           |           |
|----|-----------|-----------|-----------|
| H  | -1.665765 | 2.874306  | -0.417178 |
| H  | -4.096461 | 3.345774  | -0.658807 |
| H  | -5.749552 | 1.532734  | -0.286260 |
| H  | -4.975552 | -0.742470 | 0.332526  |
| C  | -0.520371 | 0.607653  | 0.241082  |
| N  | 0.487645  | 1.154025  | -0.132076 |
| Mg | 2.522102  | 0.919519  | -0.158613 |
| Cl | 4.504131  | 2.096339  | -0.138087 |
| Zn | 0.025696  | -1.599768 | 0.017439  |
| C  | -0.299497 | -0.673856 | 1.859262  |
| H  | -0.936193 | -1.059625 | 2.358286  |
| H  | -0.685873 | -1.644749 | 2.220647  |
| H  | 0.726767  | -0.531178 | 2.212607  |
| C  | -0.816467 | -2.516151 | -1.469368 |
| H  | -1.207414 | -1.788634 | -2.191653 |
| H  | -0.116870 | -3.169394 | -2.001823 |
| H  | -1.662944 | -3.130667 | -1.141584 |
| Cl | 2.444918  | -1.501827 | 0.058636  |
| C  | -2.899941 | -0.200094 | 0.330119  |
| C  | -1.967844 | 0.815880  | 0.119682  |
| C  | -2.402689 | 2.092407  | -0.252240 |

### PR\_MgCl<sub>2</sub>Zn

| Atom | Coordinate (Å) |           |           |
|------|----------------|-----------|-----------|
|      | x              | y         | z         |
| C    | -2.854750      | 1.827036  | 0.522546  |
| C    | -1.892084      | 0.994700  | -0.058998 |
| C    | -2.325308      | -0.129661 | -0.770030 |
| C    | -3.675712      | -0.430390 | -0.880587 |
| C    | -4.620983      | 0.390481  | -0.272731 |
| C    | -4.206689      | 1.518951  | 0.428184  |
| H    | -2.548583      | 2.713058  | 1.073444  |
| H    | -1.597218      | -0.760576 | -1.273962 |
| H    | -3.989717      | -1.302251 | -1.448965 |
| H    | -5.679373      | 0.156671  | -0.354093 |
| H    | -4.940436      | 2.165693  | 0.902323  |
| C    | -0.434363      | 1.290982  | 0.060626  |
| N    | 0.452914       | 0.368364  | 0.112678  |
| Mg   | 2.502119       | 0.425915  | 0.045911  |
| Cl   | 3.902118       | 2.238171  | -0.182136 |
| Zn   | 0.077760       | -1.499620 | 0.225905  |
| C    | -0.071042      | 2.750035  | 0.117617  |
| H    | -0.366890      | 3.175190  | 1.085048  |
| H    | 1.007065       | 2.900126  | 0.005349  |
| H    | -0.598812      | 3.322248  | -0.653269 |
| C    | -0.868052      | -3.158953 | 0.399387  |
| H    | -0.259054      | -3.950250 | 0.849066  |
| H    | -1.766410      | -3.036569 | 1.016180  |
| H    | -1.199364      | -3.516182 | -0.583324 |
| Cl   | 2.692239       | -1.937417 | -0.171436 |
| C    | -2.854750      | 1.827036  | 0.522546  |
| C    | -1.892084      | 0.994700  | -0.058998 |
| C    | -2.325308      | -0.129661 | -0.770030 |

### RCa\_MgCl<sub>2</sub>Zn<sub>THF1</sub>

| Atom | Coordinate (Å) |           |           |
|------|----------------|-----------|-----------|
|      | X              | y         | z         |
| C    | -3.488225      | 0.572825  | -0.018647 |
| C    | -2.557548      | 1.617328  | 0.074795  |
| C    | -2.962808      | 2.956978  | 0.093752  |
| C    | -4.316304      | 3.246087  | 0.015805  |
| C    | -5.247079      | 2.213250  | -0.077904 |
| C    | -4.836408      | 0.882058  | -0.095044 |
| H    | -3.131370      | -0.454765 | -0.035722 |
| H    | -2.222985      | 3.748338  | 0.168950  |
| H    | -4.648222      | 4.279872  | 0.028788  |

|    |           |           |           |
|----|-----------|-----------|-----------|
| H  | -6.306101 | 2.449254  | -0.137962 |
| H  | -5.568981 | 0.083960  | -0.168263 |
| C  | -1.183393 | 1.265693  | 0.157854  |
| N  | -0.082732 | 0.905275  | 0.223235  |
| Mg | 1.629051  | -0.352321 | 0.534538  |
| Zn | -1.364014 | -2.299029 | -0.202725 |
| C  | -1.327796 | -2.359886 | 1.733018  |
| H  | -1.850100 | -1.498693 | 2.173359  |
| H  | -1.815977 | -3.255597 | 2.137956  |
| H  | -0.306799 | -2.353281 | 2.138605  |
| C  | -1.949177 | -1.966529 | -2.015967 |
| H  | -3.039092 | -2.000430 | -2.142681 |
| H  | -1.622220 | -0.971719 | -2.351885 |
| H  | -1.519784 | -2.685215 | -2.725716 |
| O  | 2.863255  | 0.750833  | -0.680912 |
| C  | 2.942991  | 2.192230  | -0.520886 |
| C  | 4.154212  | 0.228479  | -1.087108 |
| C  | 4.311317  | 2.575135  | -1.048739 |
| H  | 2.107183  | 2.639702  | -1.066883 |
| H  | 2.838529  | 2.418573  | 0.549424  |
| C  | 5.132131  | 1.328199  | -0.741572 |
| H  | 4.329773  | -0.713880 | -0.557136 |
| H  | 4.117341  | 0.025940  | -2.164978 |
| H  | 4.695919  | 3.479684  | -0.570854 |
| H  | 4.271938  | 2.748612  | -2.130928 |
| H  | 5.383644  | 1.286694  | 0.325924  |
| H  | 6.057240  | 1.259742  | -1.319612 |
| Cl | 2.485909  | 0.060953  | 2.639178  |
| Cl | 1.351944  | -2.304644 | -0.722388 |

### TSa\_MgCl<sub>2</sub>Zn<sub>THF1</sub>

| Atom | Coordinate (Å) |           |           |
|------|----------------|-----------|-----------|
|      | x              | y         | z         |
| C    | -3.494061      | -0.360313 | -0.179597 |
| C    | -2.511313      | -0.140582 | 0.785308  |
| C    | -2.760476      | 0.746564  | 1.839366  |
| C    | -3.988418      | 1.385304  | 1.933785  |
| C    | -4.968204      | 1.158946  | 0.969937  |
| C    | -4.717322      | 0.290754  | -0.088285 |
| H    | -3.296943      | -1.037084 | -1.007795 |
| H    | -1.980708      | 0.917052  | 2.577768  |
| H    | -4.181509      | 2.063743  | 2.760605  |
| H    | -5.928899      | 1.662184  | 1.043348  |
| H    | -5.477495      | 0.118040  | -0.845226 |
| C    | -1.172402      | -0.740968 | 0.727957  |
| N    | -0.114063      | -0.559335 | 1.276608  |
| Mg   | 1.919460       | -0.651644 | 1.001816  |
| Cl   | 3.538859       | -1.015511 | 2.601944  |
| O    | 2.044596       | 1.216015  | 0.157262  |
| C    | 1.144324       | 2.326881  | 0.398068  |
| C    | 2.940494       | 1.524124  | -0.939437 |
| H    | 0.128874       | 1.926945  | 0.500770  |
| H    | 1.438295       | 2.803094  | 1.341909  |
| C    | 1.339320       | 3.244961  | -0.790523 |
| C    | 2.808246       | 3.019097  | -1.131252 |
| H    | 3.943357       | 1.184570  | -0.659328 |
| H    | 2.605737       | 0.962334  | -1.822440 |
| H    | 1.100749       | 4.284651  | -0.552002 |
| H    | 0.700923       | 2.924719  | -1.624552 |
| H    | 3.072696       | 3.329091  | -2.145523 |
| H    | 3.454477       | 3.555735  | -0.426036 |
| Zn   | -0.447897      | -1.027550 | -1.393544 |
| C    | -1.371433      | -2.533307 | -0.277888 |
| H    | -2.222255      | -2.706247 | 0.384596  |
| H    | -1.701911      | -2.947002 | -1.250363 |
| H    | -0.519247      | -3.110386 | 0.091984  |

|    |           |           |           |
|----|-----------|-----------|-----------|
| C  | -0.738807 | 0.544771  | -2.495640 |
| H  | -1.512960 | 0.383629  | -3.254840 |
| H  | -1.073090 | 1.384700  | -1.871220 |
| H  | 0.174522  | 0.855589  | -3.017883 |
| Cl | 1.817656  | -1.838564 | -1.139849 |

**PRa\_MgCl<sub>2</sub>Zn<sub>THF</sub>1**

| Atom | Coordinate (Å) |           |           |
|------|----------------|-----------|-----------|
|      | x              | y         | z         |
| C    | -3.911316      | 1.169672  | -0.025995 |
| C    | -2.655818      | 0.682700  | 0.352821  |
| C    | -2.577250      | -0.584373 | 0.940046  |
| C    | -3.716609      | -1.357537 | 1.120854  |
| C    | -4.955985      | -0.874106 | 0.711747  |
| C    | -5.050191      | 0.390154  | 0.137965  |
| H    | -3.999864      | 2.156153  | -0.475742 |
| H    | -1.614225      | -0.953517 | 1.291916  |
| H    | -3.637529      | -2.335663 | 1.588257  |
| H    | -5.848671      | -1.479472 | 0.846923  |
| H    | -6.016107      | 0.773052  | -0.181583 |
| C    | -1.419069      | 1.492256  | 0.153989  |
| N    | -0.308951      | 0.937241  | -0.153145 |
| Mg   | 0.235475       | -0.921777 | -0.869224 |
| Cl   | -0.836353      | -2.640621 | -1.994116 |
| O    | 1.162075       | -1.699503 | 0.814416  |
| C    | 1.415464       | -0.903153 | 1.994129  |
| C    | 2.288423       | -2.600992 | 0.612034  |
| H    | 0.862300       | 0.036406  | 1.885605  |
| H    | 1.035964       | -1.442885 | 2.872850  |
| C    | 2.918891       | -0.769216 | 2.016488  |
| C    | 3.347997       | -2.180836 | 1.625254  |
| H    | 1.935559       | -3.628396 | 0.743618  |
| H    | 2.627893       | -2.466841 | -0.422351 |
| H    | 3.302943       | -0.454074 | 2.990293  |
| H    | 3.235697       | -0.037252 | 1.260232  |
| H    | 4.354319       | -2.222918 | 1.201019  |
| H    | 3.323667       | -2.837778 | 2.502311  |
| Zn   | 1.375427       | 1.845429  | -0.327594 |
| C    | -1.576908      | 2.979104  | 0.333168  |
| H    | -2.217383      | 3.222773  | 1.187329  |
| H    | -0.601684      | 3.457964  | 0.464929  |
| H    | -2.045302      | 3.419697  | -0.556238 |
| C    | 2.805997       | 2.927706  | 0.381053  |
| H    | 2.667813       | 4.000198  | 0.204319  |
| H    | 2.894356       | 2.787766  | 1.465648  |
| H    | 3.766147       | 2.640497  | -0.063441 |
| Cl   | 2.205171       | 0.044727  | -1.894826 |

**RCb\_MgCl<sub>2</sub>Zn<sub>THF</sub>1**

| Atom | Coordinate (Å) |           |           |
|------|----------------|-----------|-----------|
|      | x              | y         | z         |
| C    | 3.190540       | -0.170195 | 0.379529  |
| C    | 2.616167       | -1.277886 | -0.259543 |
| C    | 3.350955       | -2.445497 | -0.495959 |
| C    | 4.674430       | -2.495859 | -0.086304 |
| C    | 5.252049       | -1.398017 | 0.548414  |
| C    | 4.514579       | -0.239221 | 0.780917  |
| H    | 2.586491       | 0.721215  | 0.533645  |
| H    | 2.885299       | -3.291114 | -0.993242 |
| H    | 5.259411       | -3.393416 | -0.263102 |
| H    | 6.290601       | -1.445966 | 0.864546  |
| H    | 4.973522       | 0.612340  | 1.274179  |
| C    | 1.256327       | -1.173168 | -0.659773 |
| N    | 0.146226       | -1.013668 | -0.954640 |
| Mg   | -1.858682      | -0.303466 | -1.252203 |
| Zn   | 0.724624       | 2.251813  | 0.240738  |

|    |           |           |           |
|----|-----------|-----------|-----------|
| C  | 0.112439  | 1.486569  | 1.911382  |
| H  | 0.919923  | 1.333503  | 2.638942  |
| H  | -0.648391 | 2.104173  | 2.407643  |
| H  | -0.348227 | 0.504132  | 1.728527  |
| C  | 1.856959  | 2.772535  | -1.238100 |
| H  | 2.889982  | 3.000108  | -0.945118 |
| H  | 1.908724  | 1.962181  | -1.979767 |
| H  | 1.469897  | 3.650267  | -1.770910 |
| O  | -2.479943 | -0.718534 | 0.654038  |
| C  | -3.193623 | 0.198519  | 1.524344  |
| C  | -2.223974 | -1.968403 | 1.340057  |
| C  | -3.074269 | -0.416096 | 2.901717  |
| H  | -2.725345 | 1.182634  | 1.422468  |
| H  | -4.235025 | 0.251964  | 1.182198  |
| C  | -3.081178 | -1.908168 | 2.586831  |
| H  | -2.470238 | -2.788065 | 0.656820  |
| H  | -1.152848 | -2.010712 | 1.582490  |
| H  | -3.887339 | -0.107236 | 3.563687  |
| H  | -2.121191 | -0.123043 | 3.361236  |
| H  | -4.100038 | -2.249855 | 2.368367  |
| H  | -2.677347 | -2.526175 | 3.392920  |
| Cl | -2.912279 | -1.693660 | -2.768759 |
| Cl | -1.613889 | 2.032103  | -1.182542 |

**TSb\_MgCl<sub>2</sub>Zn<sub>THF</sub>1**

| Atom | Coordinate (Å) |           |           |
|------|----------------|-----------|-----------|
|      | x              | y         | z         |
| C    | 3.412247       | 0.507310  | -0.633502 |
| C    | 2.454104       | 0.857286  | 0.317440  |
| C    | 2.805030       | 1.700262  | 1.377799  |
| C    | 4.096029       | 2.200946  | 1.467769  |
| C    | 5.048972       | 1.849537  | 0.514966  |
| C    | 4.707088       | 0.997791  | -0.531377 |
| H    | 3.143306       | -0.156775 | -1.451847 |
| H    | 2.051168       | 1.958152  | 2.117256  |
| H    | 4.360554       | 2.867194  | 2.284619  |
| H    | 6.060641       | 2.240447  | 0.587927  |
| H    | 5.449994       | 0.716164  | -1.272687 |
| C    | 1.074917       | 0.351505  | 0.294734  |
| N    | 0.148054       | 0.294743  | 1.066717  |
| Mg   | -1.780384      | -0.433670 | 1.086404  |
| Zn   | 0.945597       | -1.677721 | -0.708558 |
| C    | 0.588813       | 0.139901  | -1.698790 |
| H    | 1.029744       | 1.130630  | -1.830594 |
| H    | 0.897603       | -0.411254 | -2.607621 |
| H    | -0.501859      | 0.237109  | -1.689422 |
| C    | 2.348768       | -2.936433 | -0.251294 |
| H    | 3.138900       | -2.953696 | -1.011055 |
| H    | 2.819391       | -2.653931 | 0.698441  |
| H    | 1.968893       | -3.957919 | -0.142258 |
| O    | -2.561688      | 0.882588  | -0.282470 |
| C    | -3.523999      | 0.577924  | -1.319936 |
| C    | -2.256157      | 2.299509  | -0.275426 |
| H    | -3.495899      | 1.791717  | -2.222390 |
| C    | -3.211860      | -0.356440 | -1.798460 |
| H    | -4.506288      | 0.433464  | -0.851007 |
| C    | -3.265606      | 2.918701  | -1.221016 |
| H    | -2.321143      | 2.657880  | 0.757634  |
| H    | -1.225170      | 2.423793  | -0.634170 |
| H    | -4.417598      | 1.901795  | -2.799249 |
| H    | -2.654512      | 1.722971  | -2.924005 |
| H    | -4.196008      | 3.153728  | -0.690569 |
| H    | -2.890002      | 3.837588  | -1.678323 |
| Cl   | -3.141423      | -0.508688 | 2.943922  |
| Cl   | -1.359034      | -2.309833 | -0.412500 |

| <b>PRb_MgCl<sub>2</sub>Zn<sub>THF</sub>1</b> |                |           |           |
|----------------------------------------------|----------------|-----------|-----------|
| Atom                                         | Coordinate (Å) |           |           |
|                                              | x              | y         | z         |
| C                                            | -2.096837      | 2.502684  | -0.422074 |
| C                                            | -1.193930      | 1.763592  | 0.350734  |
| C                                            | -1.687600      | 0.999174  | 1.413208  |
| C                                            | -3.048714      | 0.958570  | 1.687355  |
| C                                            | -3.940992      | 1.678446  | 0.895736  |
| C                                            | -3.461662      | 2.448352  | -0.160427 |
| H                                            | -1.736723      | 3.112117  | -1.248335 |
| H                                            | -0.991176      | 0.451466  | 2.047653  |
| H                                            | -3.411665      | 0.369820  | 2.526769  |
| H                                            | -5.006736      | 1.647162  | 1.108016  |
| H                                            | -4.152500      | 3.014562  | -0.779996 |
| C                                            | 0.270527       | 1.775069  | 0.064008  |
| N                                            | 0.985476       | 0.735026  | 0.263220  |
| Mg                                           | 0.542880       | -1.278545 | 0.452422  |
| Zn                                           | 2.860393       | 0.655380  | -0.081774 |
| C                                            | 0.825906       | 3.064983  | -0.477035 |
| H                                            | 0.479623       | 3.932076  | 0.095904  |
| H                                            | 1.919722       | 3.036801  | -0.470199 |
| H                                            | 0.503519       | 3.216344  | -1.515060 |
| C                                            | 4.729412       | 1.094391  | -0.092888 |
| H                                            | 4.906869       | 2.175704  | -0.104836 |
| H                                            | 5.229425       | 0.690475  | 0.794671  |
| H                                            | 5.229177       | 0.669590  | -0.970822 |
| O                                            | -1.121264      | -1.565996 | -0.699646 |
| C                                            | -1.288511      | -0.975953 | -2.012852 |
| C                                            | -2.385522      | -2.099311 | -0.225051 |
| C                                            | -2.646330      | -1.454562 | -2.479883 |
| H                                            | -1.262941      | 0.118185  | -1.901632 |
| H                                            | -0.448648      | -1.297798 | -2.636461 |
| C                                            | -3.418403      | -1.521839 | -1.167478 |
| H                                            | -2.333549      | -3.193904 | -0.279326 |
| H                                            | -2.510573      | -1.798121 | 0.820256  |
| H                                            | -2.568242      | -2.450886 | -2.931702 |
| H                                            | -3.090662      | -0.777321 | -3.213874 |
| H                                            | -4.319641      | -2.138083 | -1.220353 |
| H                                            | -3.704069      | -0.512759 | -0.838279 |
| Cl                                           | 0.055951       | -2.253007 | 2.494758  |
| Cl                                           | 2.477588       | -1.782467 | -0.891448 |

| <b>RCa_MgCl<sub>2</sub>Zn<sub>THF</sub>2</b> |                |           |           |
|----------------------------------------------|----------------|-----------|-----------|
| Atom                                         | Coordinate (Å) |           |           |
|                                              | x              | y         | z         |
| C                                            | 3.439809       | 0.236072  | -2.437629 |
| C                                            | 4.781901       | -0.097010 | -2.538939 |
| C                                            | 5.412127       | -0.782220 | -1.502158 |
| C                                            | 4.708763       | -1.140597 | -0.354363 |
| C                                            | 3.366885       | -0.816763 | -0.235352 |
| C                                            | 2.738876       | -0.127451 | -1.281978 |
| H                                            | 2.933018       | 0.769347  | -3.236650 |
| H                                            | 5.339938       | 0.178444  | -3.428854 |
| H                                            | 6.464475       | -1.038784 | -1.589567 |
| H                                            | 5.207868       | -1.672620 | 0.450012  |
| H                                            | 2.788864       | -1.069828 | 0.651073  |
| C                                            | 1.358540       | 0.186075  | -1.134620 |
| N                                            | 0.233837       | 0.402997  | -0.949596 |
| Mg                                           | -1.798757      | 0.524244  | -0.110564 |
| Cl                                           | -3.717661      | 0.969800  | -1.411277 |
| C                                            | 0.547474       | -2.730193 | 1.476941  |
| H                                            | 1.439156       | -3.364700 | 1.390465  |
| H                                            | -0.181698      | -3.283445 | 2.084047  |
| H                                            | 0.109634       | -2.636976 | 0.472322  |
| Zn                                           | 0.913004       | -0.975371 | 2.208881  |
| C                                            | 1.915291       | 0.603001  | 2.729393  |

|    |           |           |           |
|----|-----------|-----------|-----------|
| H  | 1.374893  | 1.219672  | 3.459107  |
| H  | 2.887187  | 0.355972  | 3.177194  |
| H  | 2.134095  | 1.254002  | 1.869263  |
| O  | -1.310238 | 2.582253  | 0.104648  |
| C  | -1.265790 | 3.436103  | -1.063096 |
| C  | -0.367681 | 3.059423  | 1.092527  |
| C  | -0.363471 | 4.595469  | -0.683653 |
| H  | -0.844785 | 2.854358  | -1.896590 |
| H  | -2.290025 | 3.719733  | -1.320863 |
| C  | 0.581970  | 3.946137  | 0.319579  |
| H  | -0.922011 | 3.621903  | 1.856290  |
| H  | 0.098504  | 2.192265  | 1.568435  |
| H  | -0.942139 | 5.390482  | -0.197469 |
| H  | 0.141435  | 5.025377  | -1.552970 |
| H  | 1.102965  | 4.661823  | 0.961315  |
| H  | 1.334155  | 3.333837  | -0.197565 |
| O  | -1.880057 | -1.535116 | -0.578333 |
| C  | -2.890231 | -2.363696 | 0.040700  |
| C  | -1.547683 | -2.054792 | -1.882724 |
| C  | -3.429304 | -3.224248 | -1.081623 |
| H  | -2.404500 | -2.958486 | 0.826718  |
| H  | -3.638632 | -1.710495 | 0.501011  |
| C  | -2.183430 | -3.429008 | -1.933809 |
| H  | -1.967789 | -1.378279 | -2.641570 |
| H  | -0.456329 | -2.068380 | -1.977100 |
| H  | -4.192087 | -2.673656 | -1.647181 |
| H  | -3.871625 | -4.155510 | -0.717688 |
| H  | -2.395260 | -3.751250 | -2.956807 |
| H  | -1.520979 | -4.170139 | -1.467494 |
| Cl | -1.604229 | 0.050768  | 2.227921  |

| <b>TSa_MgCl<sub>2</sub>Zn<sub>THF</sub>2</b> |                |           |           |
|----------------------------------------------|----------------|-----------|-----------|
| Atom                                         | Coordinate (Å) |           |           |
|                                              | x              | y         | z         |
| C                                            | 3.078325       | 1.097422  | -1.602054 |
| C                                            | 4.334963       | 1.012968  | -2.186715 |
| C                                            | 5.279021       | 0.121954  | -1.683263 |
| C                                            | 4.966449       | -0.682390 | -0.590903 |
| C                                            | 3.718567       | -0.586408 | 0.011227  |
| C                                            | 2.770131       | 0.303199  | -0.493684 |
| H                                            | 2.323969       | 1.778075  | -1.991245 |
| H                                            | 4.576727       | 1.640855  | -3.040329 |
| H                                            | 6.260674       | 0.052826  | -2.144986 |
| H                                            | 5.698997       | -1.385507 | -0.203631 |
| H                                            | 3.469592       | -1.216106 | 0.862984  |
| C                                            | 1.405943       | 0.395785  | 0.040179  |
| N                                            | 0.298040       | 0.523863  | -0.416541 |
| Mg                                           | -1.764042      | 0.355028  | -0.153209 |
| Cl                                           | -3.527559      | 0.376544  | -1.708424 |
| C                                            | 1.059525       | -2.892807 | 1.400174  |
| H                                            | 1.900220       | -3.241444 | 2.011876  |
| H                                            | 0.192036       | -3.516623 | 1.646028  |
| H                                            | 1.321605       | -3.089061 | 0.351387  |
| Zn                                           | 0.677363       | -1.005690 | 1.656805  |
| C                                            | 1.789383       | 0.735900  | 2.047297  |
| H                                            | 1.146606       | 0.767838  | 2.944770  |
| H                                            | 2.797346       | 0.425053  | 2.332628  |
| H                                            | 1.838507       | 1.777648  | 1.715808  |
| O                                            | -1.845830      | 2.448043  | 0.173055  |
| C                                            | -1.885007      | 3.304324  | -0.998008 |
| C                                            | -1.053200      | 3.080223  | 1.203520  |
| C                                            | -1.218301      | 4.598878  | -0.574507 |
| H                                            | -1.323547      | 2.811151  | -1.804979 |
| H                                            | -2.926824      | 3.406536  | -1.312966 |
| C                                            | -0.224615      | 4.111909  | 0.472954  |
| H                                            | -1.734461      | 3.545345  | 1.929046  |

|    |           |           |           |
|----|-----------|-----------|-----------|
| H  | -0.476043 | 2.303938  | 1.714205  |
| H  | -1.948006 | 5.278521  | -0.117320 |
| H  | -0.753094 | 5.115534  | -1.418198 |
| H  | 0.143683  | 4.901254  | 1.133736  |
| H  | 0.636978  | 3.630174  | -0.011580 |
| O  | -1.433580 | -1.731612 | -0.483613 |
| C  | -2.427583 | -2.691647 | -0.058139 |
| C  | -0.793072 | -2.189888 | -1.695365 |
| C  | -2.582005 | -3.645368 | -1.224592 |
| H  | -2.050003 | -3.191692 | 0.844342  |
| H  | -3.347228 | -2.151703 | 0.193365  |
| C  | -1.176079 | -3.649952 | -1.811628 |
| H  | -1.181492 | -1.597702 | -2.537203 |
| H  | 0.283394  | -2.009940 | -1.598448 |
| H  | -3.296461 | -3.238095 | -1.951301 |
| H  | -2.931848 | -4.632666 | -0.911031 |
| H  | -1.131480 | -4.010266 | -2.842857 |
| H  | -0.507074 | -4.268569 | -1.199112 |
| Cl | -1.545429 | -0.254082 | 2.261405  |

| <b>PRa_MgCl<sub>2</sub>Zn<sub>THF</sub><sub>2</sub></b> |                |           |           |
|---------------------------------------------------------|----------------|-----------|-----------|
| Atom                                                    | Coordinate (Å) |           |           |
|                                                         | x              | y         | z         |
| C                                                       | 2.056242       | 0.299437  | 1.835452  |
| C                                                       | 3.245839       | -0.181098 | 2.367175  |
| C                                                       | 4.448650       | 0.457461  | 2.072938  |
| C                                                       | 4.448621       | 1.589906  | 1.264152  |
| C                                                       | 3.253274       | 2.078100  | 0.745043  |
| C                                                       | 2.043998       | 1.425372  | 1.006243  |
| H                                                       | 1.114559       | -0.190929 | 2.080147  |
| H                                                       | 3.233026       | -1.053742 | 3.016238  |
| H                                                       | 5.381902       | 0.079839  | 2.483259  |
| H                                                       | 5.382682       | 2.097622  | 1.036417  |
| H                                                       | 3.270173       | 2.961876  | 0.110583  |
| C                                                       | 0.760292       | 1.886339  | 0.397661  |
| N                                                       | -0.150922      | 1.048917  | 0.094871  |
| Mg                                                      | -0.316008      | -0.997561 | -0.304864 |
| Cl                                                      | -0.326669      | -2.934028 | 1.023318  |
| C                                                       | -3.525389      | 2.361682  | -0.992941 |
| H                                                       | -3.408208      | 3.422527  | -1.240271 |
| H                                                       | -4.085782      | 1.896184  | -1.813030 |
| H                                                       | -4.155311      | 2.304872  | -0.095206 |
| Zn                                                      | -1.848572      | 1.451895  | -0.698289 |
| C                                                       | 0.637606       | 3.366291  | 0.144406  |
| H                                                       | -0.391420      | 3.612763  | -0.135708 |
| H                                                       | 0.933772       | 3.960134  | 1.016512  |
| H                                                       | 1.289325       | 3.668272  | -0.685889 |
| O                                                       | 1.583546       | -1.269984 | -1.137547 |
| C                                                       | 2.564386       | -2.255880 | -0.734860 |
| C                                                       | 2.176841       | -0.328040 | -2.059183 |
| C                                                       | 3.724982       | -2.062466 | -1.688160 |
| H                                                       | 2.853709       | -2.045608 | 0.304711  |
| H                                                       | 2.093656       | -3.241671 | -0.778145 |
| C                                                       | 3.668009       | -0.561993 | -1.945950 |
| H                                                       | 1.796551       | -0.543932 | -3.066439 |
| H                                                       | 1.857749       | 0.680544  | -1.770636 |
| H                                                       | 3.555985       | -2.617526 | -2.619414 |
| H                                                       | 4.672144       | -2.397143 | -1.256349 |
| H                                                       | 4.207244       | -0.248099 | -2.843859 |
| H                                                       | 4.072198       | -0.010725 | -1.085148 |
| O                                                       | -2.394451      | -0.449471 | 0.499846  |
| C                                                       | -3.570498      | -1.198383 | 0.082603  |
| C                                                       | -2.473130      | -0.183991 | 1.926051  |
| C                                                       | -4.254865      | -1.611110 | 1.368002  |
| H                                                       | -4.192964      | -0.525669 | -0.523020 |
| H                                                       | -3.237582      | -2.032005 | -0.542540 |

|    |           |           |           |
|----|-----------|-----------|-----------|
| C  | -3.916403 | -0.448422 | 2.292500  |
| H  | -1.790152 | -0.877397 | 2.436322  |
| H  | -2.137985 | 0.844366  | 2.098776  |
| H  | -3.815494 | -2.540730 | 1.750687  |
| H  | -5.328462 | -1.766269 | 1.231692  |
| H  | -4.037087 | -0.681704 | 3.353713  |
| H  | -4.538977 | 0.424544  | 2.057212  |
| Cl | -1.410567 | -0.486709 | -2.432898 |

| <b>RCb_MgCl<sub>2</sub>Zn<sub>THF</sub><sub>2</sub></b> |                |           |           |
|---------------------------------------------------------|----------------|-----------|-----------|
| Atom                                                    | Coordinate (Å) |           |           |
|                                                         | x              | y         | z         |
| C                                                       | -3.952609      | 1.794993  | 0.606977  |
| C                                                       | -5.335699      | 1.890223  | 0.626247  |
| C                                                       | -6.112162      | 0.740240  | 0.750724  |
| C                                                       | -5.514067      | -0.513172 | 0.857927  |
| C                                                       | -4.132229      | -0.627774 | 0.841026  |
| C                                                       | -3.356665      | 0.532340  | 0.715543  |
| H                                                       | -3.331389      | 2.681880  | 0.513745  |
| H                                                       | -5.810360      | 2.863518  | 0.544010  |
| H                                                       | -7.195678      | 0.822143  | 0.765172  |
| H                                                       | -6.126981      | -1.404179 | 0.956765  |
| H                                                       | -3.642420      | -1.595758 | 0.925821  |
| C                                                       | -1.937963      | 0.417115  | 0.688207  |
| N                                                       | -0.783015      | 0.316150  | 0.664138  |
| Mg                                                      | 1.432904       | 0.017933  | 0.700074  |
| C                                                       | -1.526461      | -3.204920 | 0.479915  |
| H                                                       | -2.532901      | -3.618774 | 0.629479  |
| H                                                       | -0.839155      | -4.060934 | 0.456141  |
| H                                                       | -1.272524      | -2.639513 | 1.389009  |
| Zn                                                      | -1.333776      | -2.095621 | -1.092914 |
| C                                                       | -1.725586      | -0.944982 | -2.601601 |
| H                                                       | -0.889130      | -0.894301 | -3.311462 |
| H                                                       | -2.602697      | -1.275233 | -3.172975 |
| H                                                       | -1.935782      | 0.088800  | -2.289465 |
| O                                                       | 1.381635       | 1.753175  | -0.465293 |
| C                                                       | 1.215749       | 3.041762  | 0.169227  |
| C                                                       | 0.800937       | 1.774175  | -1.791464 |
| C                                                       | 0.700611       | 3.959617  | -0.922701 |
| H                                                       | 0.484616       | 2.931684  | 0.984248  |
| H                                                       | 2.180834       | 3.336992  | 0.595298  |
| C                                                       | -0.091956      | 2.994153  | -1.797452 |
| H                                                       | 1.618591       | 1.863337  | -2.520766 |
| H                                                       | 0.281437       | 0.823904  | -1.954857 |
| H                                                       | 1.535410       | 4.387735  | -1.490832 |
| H                                                       | 0.102808       | 4.782258  | -0.521994 |
| H                                                       | -0.278776      | 3.369515  | -2.806925 |
| H                                                       | -1.059010      | 2.755795  | -1.333451 |
| Cl                                                      | 1.473659       | -0.130673 | 3.049831  |
| O                                                       | 3.528802       | 0.194263  | 0.544103  |
| C                                                       | 4.383387       | -0.697531 | 1.297846  |
| C                                                       | 4.144538       | 0.505061  | -0.727708 |
| C                                                       | 5.740622       | -0.575071 | 0.641694  |
| H                                                       | 4.342245       | -0.390264 | 2.345891  |
| H                                                       | 3.983730       | -1.719409 | 1.212095  |
| C                                                       | 5.353330       | -0.405127 | -0.821813 |
| H                                                       | 3.410888       | 0.332267  | -1.522104 |
| H                                                       | 4.418750       | 1.568593  | -0.718804 |
| H                                                       | 6.372665       | -1.447217 | 0.829150  |
| H                                                       | 6.264571       | 0.316377  | 1.008889  |
| H                                                       | 5.061472       | -1.372916 | -1.249670 |
| H                                                       | 6.146201       | 0.019864  | -1.443284 |
| Cl                                                      | 1.373751       | -1.737087 | -0.919689 |

| <b>TSb_MgCl<sub>2</sub>Zn<sub>THF</sub><sub>2</sub></b> |                |  |  |
|---------------------------------------------------------|----------------|--|--|
| Atom                                                    | Coordinate (Å) |  |  |



|    | x         | y         | z         |
|----|-----------|-----------|-----------|
| C  | -3.557915 | 1.800451  | 0.533040  |
| C  | -4.840688 | 2.274740  | 0.772840  |
| C  | -5.942461 | 1.462027  | 0.520834  |
| C  | -5.758072 | 0.174507  | 0.024885  |
| C  | -4.477686 | -0.294226 | -0.239464 |
| C  | -3.370724 | 0.516032  | 0.013821  |
| H  | -2.686784 | 2.417767  | 0.741672  |
| H  | -4.980709 | 3.280154  | 1.161452  |
| H  | -6.946573 | 1.831987  | 0.712148  |
| H  | -6.615640 | -0.465975 | -0.163587 |
| H  | -4.336309 | -1.297887 | -0.635115 |
| C  | -1.982336 | 0.066541  | -0.172495 |
| N  | -0.937618 | 0.255139  | 0.405527  |
| Mg | 1.138589  | -0.033872 | 0.644478  |
| C  | -1.812378 | -3.427944 | 0.685327  |
| H  | -1.737201 | -4.427507 | 0.243583  |
| H  | -1.129936 | -3.394782 | 1.543476  |
| H  | -2.830953 | -3.309406 | 1.072573  |
| Zn | -1.341131 | -2.024562 | -0.565351 |
| C  | -2.021004 | -0.709390 | -2.060022 |
| H  | -1.582039 | -1.551122 | -2.627795 |
| H  | -3.067990 | -0.632985 | -2.348698 |
| H  | -1.463755 | 0.168899  | -2.398410 |
| O  | 1.398499  | 1.961527  | 0.066002  |
| C  | 2.291119  | 2.899509  | 0.704668  |
| C  | 0.742361  | 2.581797  | -1.062684 |
| C  | 2.545705  | 3.950910  | -0.352854 |
| H  | 1.788934  | 3.319517  | 1.586675  |
| H  | 3.176124  | 2.343219  | 1.030513  |
| C  | 1.183190  | 4.034462  | -1.032520 |
| H  | 1.076881  | 2.063946  | -1.973341 |
| H  | -0.339005 | 2.440957  | -0.955768 |
| H  | 3.308699  | 3.603112  | -1.061661 |
| H  | 2.879058  | 4.900713  | 0.073135  |
| H  | 1.220241  | 4.474175  | -2.032503 |
| H  | 0.492804  | 4.630170  | -0.423439 |
| Cl | 1.248540  | -0.711545 | 2.890683  |
| O  | 3.238155  | -0.134017 | 0.338361  |
| C  | 4.016169  | -1.208582 | 0.925131  |
| C  | 3.809703  | 0.242812  | -0.933612 |
| C  | 5.289565  | -1.261352 | 0.108284  |
| H  | 4.155621  | -0.982092 | 1.985082  |
| H  | 3.438006  | -2.138893 | 0.835899  |
| C  | 4.786410  | -0.862808 | -1.273378 |
| C  | 2.998697  | 0.355838  | -1.662041 |
| H  | 4.318015  | 1.210482  | -0.810384 |
| H  | 5.755845  | -2.249715 | 0.136548  |
| H  | 6.016577  | -0.527598 | 0.478444  |
| H  | 4.255006  | -1.700730 | -1.742136 |
| H  | 5.575641  | -0.527981 | -1.951755 |
| Cl | 0.980633  | -1.790448 | -1.163165 |

| <b>PRb<sub>2</sub>MgCl<sub>2</sub>Zn<sub>2</sub>THF<sub>2</sub></b> |                |           |           |
|---------------------------------------------------------------------|----------------|-----------|-----------|
| Atom                                                                | Coordinate (Å) |           |           |
|                                                                     | x              | y         | z         |
| C                                                                   | 2.550019       | -0.443066 | 1.368881  |
| C                                                                   | 3.362718       | -1.519651 | 1.704121  |
| C                                                                   | 4.461874       | -1.840923 | 0.911396  |
| C                                                                   | 4.754509       | -1.066156 | -0.207470 |
| C                                                                   | 3.954703       | 0.026403  | -0.528114 |
| C                                                                   | 2.831511       | 0.339761  | 0.245506  |
| H                                                                   | 1.693151       | -0.187912 | 1.992795  |
| H                                                                   | 3.139343       | -2.107268 | 2.591949  |
| H                                                                   | 5.095015       | -2.686014 | 1.170500  |
| H                                                                   | 5.613338       | -1.307103 | -0.829353 |

|    |           |           |           |
|----|-----------|-----------|-----------|
| H  | 4.199345  | 0.627354  | -1.401913 |
| C  | 1.947990  | 1.497293  | -0.091571 |
| N  | 0.681701  | 1.444193  | 0.066246  |
| Mg | -0.789049 | -0.036517 | 0.462198  |
| C  | -0.770912 | 4.876412  | -0.273066 |
| H  | 0.139827  | 5.471049  | -0.413410 |
| H  | -1.470281 | 5.160265  | -1.068049 |
| H  | -1.217955 | 5.187452  | 0.678349  |
| Zn | -0.408694 | 2.983063  | -0.277290 |
| C  | 2.668573  | 2.710218  | -0.627210 |
| H  | 1.992458  | 3.570467  | -0.656852 |
| H  | 3.548537  | 2.960517  | -0.024198 |
| H  | 3.022153  | 2.529877  | -1.650544 |
| O  | 0.217374  | -1.578878 | -0.538095 |
| C  | 0.413401  | -2.911700 | -0.012029 |
| C  | 0.808883  | -1.464467 | -1.848567 |
| C  | 0.923798  | -3.722011 | -1.186195 |
| H  | 1.155638  | -2.850515 | 0.795801  |
| H  | -0.540721 | -3.253548 | 0.403430  |
| C  | 1.707099  | -2.676354 | -1.972084 |
| H  | 0.001171  | -1.473732 | -2.596094 |
| H  | 1.334778  | -0.504911 | -1.901842 |
| H  | 0.086330  | -4.102117 | -1.786005 |
| H  | 1.529831  | -4.574032 | -0.867000 |
| H  | 1.888676  | -2.955953 | -3.013193 |
| H  | 2.673799  | -2.476270 | -1.489270 |
| Cl | -0.889696 | -0.033217 | 2.832739  |
| O  | -2.403611 | -1.440660 | 0.297602  |
| C  | -3.571283 | -1.337473 | 1.143549  |
| C  | -2.786433 | -1.935018 | -1.004869 |
| C  | -4.613547 | -2.200968 | 0.467835  |
| H  | -3.283455 | -1.655482 | 2.148729  |
| H  | -3.884181 | -0.283447 | 1.181181  |
| C  | -4.302674 | -1.952717 | -1.002813 |
| H  | -2.362458 | -1.274691 | -1.770270 |
| H  | -2.363606 | -2.943005 | -1.126977 |
| H  | -5.631745 | -1.922928 | 0.752902  |
| H  | -4.460351 | -3.257481 | 0.721927  |
| H  | -4.690467 | -0.973664 | -1.311430 |
| H  | -4.709957 | -2.712176 | -1.675749 |
| Cl | -2.292198 | 1.486807  | -0.900189 |

| <b>RCC<sub>2</sub>MgCl<sub>2</sub>Zn<sub>2</sub>THF<sub>2</sub></b> |                |           |           |
|---------------------------------------------------------------------|----------------|-----------|-----------|
| Atom                                                                | Coordinate (Å) |           |           |
|                                                                     | x              | y         | z         |
| C                                                                   | -3.852981      | -1.104284 | -1.993817 |
| C                                                                   | -5.228837      | -1.054850 | -2.159068 |
| C                                                                   | -5.973235      | -0.065375 | -1.520885 |
| C                                                                   | -5.350620      | 0.881928  | -0.711043 |
| C                                                                   | -3.975827      | 0.848225  | -0.534533 |
| C                                                                   | -3.231689      | -0.146373 | -1.183477 |
| H                                                                   | -3.256269      | -1.871702 | -2.478570 |
| H                                                                   | -5.723025      | -1.791672 | -2.785276 |
| H                                                                   | -7.051327      | -0.033781 | -1.653776 |
| H                                                                   | -5.939339      | 1.647300  | -0.214071 |
| H                                                                   | -3.471169      | 1.570674  | 0.103325  |
| C                                                                   | -1.821964      | -0.198327 | -0.991684 |
| N                                                                   | -0.672750      | -0.232789 | -0.839427 |
| Mg                                                                  | 1.471175       | -0.460832 | -0.322304 |
| C                                                                   | -1.657934      | 1.310921  | 2.248843  |
| H                                                                   | -2.635167      | 1.749013  | 2.491955  |
| H                                                                   | -0.972743      | 1.613806  | 3.052919  |
| H                                                                   | -1.301699      | 1.811863  | 1.336162  |
| Zn                                                                  | -1.720320      | -0.612940 | 2.009467  |
| C                                                                   | -2.375053      | -2.388148 | 1.610980  |
| H                                                                   | -2.139332      | -3.113525 | 2.400371  |

|    |           |           |           |
|----|-----------|-----------|-----------|
| H  | -3.461286 | -2.427888 | 1.455256  |
| H  | -1.906238 | -2.768655 | 0.692510  |
| O  | 1.507492  | 1.618972  | -0.305801 |
| C  | 1.550589  | 2.388422  | 0.919224  |
| C  | 1.103286  | 2.475492  | -1.384492 |
| C  | 0.822757  | 3.698120  | 0.614643  |
| H  | 1.058400  | 1.786773  | 1.691933  |
| H  | 2.600340  | 2.538257  | 1.201532  |
| C  | 0.139516  | 3.437003  | -0.728626 |
| H  | 1.990890  | 2.988743  | -1.785517 |
| H  | 0.670750  | 1.844015  | -2.167794 |
| H  | 1.537803  | 4.522945  | 0.522073  |
| H  | 0.111750  | 3.956601  | 1.405071  |
| H  | -0.019999 | 4.346631  | -1.313498 |
| H  | -0.830549 | 2.942113  | -0.585770 |
| O  | 3.527203  | -0.264320 | 0.121008  |
| C  | 4.277510  | -1.443519 | 0.497630  |
| C  | 4.331507  | 0.574053  | -0.740146 |
| C  | 5.459559  | -1.475513 | -0.447208 |
| H  | 4.585024  | -1.332211 | 1.545681  |
| H  | 3.619723  | -2.315732 | 0.414702  |
| C  | 5.734745  | 0.009619  | -0.648140 |
| H  | 3.932320  | 0.501156  | -1.762981 |
| H  | 4.238244  | 1.609335  | -0.394839 |
| H  | 5.166911  | -1.940866 | -1.396626 |
| H  | 6.308224  | -2.027728 | -0.034763 |
| H  | 6.326773  | 0.228850  | -1.540776 |
| H  | 6.259302  | 0.423306  | 0.222177  |
| Cl | 1.931815  | -1.686956 | -2.287303 |
| Cl | 0.949414  | -1.150191 | 1.900675  |

#### TSc\_MgCl<sub>2</sub>Zn<sub>THF</sub><sub>2</sub>

| Atom | Coordinate (Å) |           |           |
|------|----------------|-----------|-----------|
|      | x              | y         | z         |
| C    | 3.346645       | 1.372274  | 1.470778  |
| C    | 4.626805       | 1.905066  | 1.523484  |
| C    | 5.703564       | 1.185496  | 1.010723  |
| C    | 5.495973       | -0.069891 | 0.447470  |
| C    | 4.217608       | -0.612082 | 0.405888  |
| C    | 3.136462       | 0.103203  | 0.919707  |
| H    | 2.492832       | 1.923004  | 1.859126  |
| H    | 4.785757       | 2.885583  | 1.964780  |
| H    | 6.705911       | 1.604394  | 1.049903  |
| H    | 6.332769       | -0.631550 | 0.040811  |
| H    | 4.055926       | -1.594164 | -0.033086 |
| C    | 1.747161       | -0.375328 | 0.855187  |
| N    | 0.653065       | 0.121114  | 0.967466  |
| Mg   | -1.427829      | -0.017296 | 0.647934  |
| C    | 1.996249       | -0.971170 | -2.605362 |
| H    | 2.848844       | -1.560055 | -2.963712 |
| H    | 1.232816       | -0.985737 | -3.392842 |
| H    | 2.346426       | 0.064863  | -2.499773 |
| Zn   | 1.297565       | -1.632158 | -0.913213 |
| C    | 1.837042       | -2.422824 | 0.955839  |
| H    | 2.220478       | -3.290431 | 0.385739  |
| H    | 2.561662       | -2.289189 | 1.761528  |
| H    | 0.866883       | -2.675556 | 1.393858  |
| O    | -1.199742      | 1.606798  | -0.676811 |
| C    | -1.148018      | 1.374649  | -2.107558 |
| C    | -0.342803      | 2.719579  | -0.354398 |
| C    | -0.012888      | 2.248144  | -2.637900 |
| H    | -0.968283      | 0.302606  | -2.258980 |
| H    | -2.123531      | 1.628290  | -2.539321 |
| C    | 0.762749       | 2.632349  | -1.379374 |
| H    | -0.920420      | 3.650314  | -0.448109 |
| H    | -0.013786      | 2.592871  | 0.681567  |

|    |           |           |           |
|----|-----------|-----------|-----------|
| H  | -0.412549 | 3.144419  | -3.125717 |
| H  | 0.601592  | 1.711824  | -3.367578 |
| H  | 1.320280  | 3.566832  | -1.485844 |
| H  | 1.463219  | 1.836515  | -1.090471 |
| O  | -3.415822 | -0.004909 | -0.095170 |
| C  | -4.284409 | -1.140284 | 0.136955  |
| C  | -4.179760 | 1.220361  | 0.002678  |
| C  | -5.576613 | -0.552963 | 0.665264  |
| H  | -4.423327 | -1.661384 | -0.819178 |
| H  | -3.792345 | -1.819315 | 0.841244  |
| C  | -5.628916 | 0.787691  | -0.055923 |
| H  | -3.941312 | 1.701063  | 0.962973  |
| H  | -3.867874 | 1.880253  | -0.812287 |
| H  | -5.505068 | -0.398444 | 1.749190  |
| H  | -6.437802 | -1.195531 | 0.463377  |
| H  | -6.295729 | 1.513819  | 0.416805  |
| H  | -5.948441 | 0.652903  | -1.096859 |
| Cl | -2.182281 | 0.094288  | 2.876384  |
| Cl | -1.041601 | -2.063373 | -0.766568 |

#### PRc\_MgCl<sub>2</sub>Zn<sub>THF</sub><sub>2</sub>

| Atom | Coordinate (Å) |           |           |
|------|----------------|-----------|-----------|
|      | x              | y         | z         |
| C    | 2.231602       | -1.970726 | -1.223379 |
| C    | 2.671232       | -3.279384 | -1.069272 |
| C    | 3.729180       | -3.564369 | -0.210329 |
| C    | 4.354289       | -2.530097 | 0.480300  |
| C    | 3.923391       | -1.218598 | 0.313956  |
| C    | 2.839985       | -0.926343 | -0.523544 |
| H    | 1.399600       | -1.750973 | -1.887423 |
| H    | 2.182871       | -4.077455 | -1.624164 |
| H    | 4.070448       | -4.588984 | -0.083660 |
| H    | 5.182949       | -2.744449 | 1.150966  |
| H    | 4.420231       | -0.422125 | 0.864707  |
| C    | 2.311797       | 0.464750  | -0.645809 |
| N    | 1.059870       | 0.706703  | -0.739135 |
| Mg   | -0.885667      | -0.192677 | -0.516888 |
| C    | 0.721486       | 4.364841  | -0.097195 |
| H    | 1.742286       | 4.737341  | -0.243662 |
| H    | 0.043819       | 5.056554  | -0.610812 |
| H    | 0.501796       | 4.439534  | 0.975647  |
| Zn   | 0.500507       | 2.550665  | -0.720498 |
| C    | 3.370730       | 1.543197  | -0.616576 |
| H    | 2.951644       | 2.507591  | -0.916386 |
| H    | 3.779448       | 1.661517  | 0.396031  |
| H    | 4.213180       | 1.298459  | -1.272943 |
| O    | -0.512349      | -0.137051 | 1.572290  |
| C    | -0.908410      | 0.955761  | 2.429599  |
| C    | 0.590838       | -0.821555 | 2.185814  |
| C    | 0.234627       | 1.143869  | 3.429919  |
| H    | -1.076402      | 1.834004  | 1.793730  |
| H    | -1.859598      | 0.700734  | 2.913913  |
| C    | 1.364886       | 0.290916  | 2.853425  |
| H    | 0.198859       | -1.545522 | 2.917032  |
| H    | 1.134514       | -1.361013 | 1.401964  |
| H    | -0.057236      | 0.767582  | 4.416724  |
| H    | 0.510071       | 2.196002  | 3.543693  |
| H    | 2.066970       | -0.067343 | 3.611042  |
| H    | 1.925222       | 0.850666  | 2.091490  |
| O    | -2.891493      | -0.506656 | 0.296750  |
| C    | -4.038212      | -0.397836 | -0.579844 |
| C    | -3.077788      | -1.621307 | 1.197415  |
| C    | -4.819070      | -1.680290 | -0.383919 |
| H    | -4.613318      | 0.488190  | -0.278932 |
| H    | -3.679806      | -0.250325 | -1.603305 |
| C    | -4.541399      | -1.992493 | 1.080594  |

|    |           |           |           |
|----|-----------|-----------|-----------|
| H  | -2.427420 | -2.445992 | 0.868070  |
| H  | -2.771420 | -1.308536 | 2.200965  |
| H  | -4.408648 | -2.469947 | -1.025592 |
| H  | -5.881057 | -1.560438 | -0.615473 |
| H  | -4.725988 | -3.035972 | 1.350586  |
| H  | -5.153186 | -1.355437 | 1.731942  |
| Cl | -1.177689 | -2.164633 | -1.792550 |
| Cl | -1.763510 | 1.922235  | -1.487089 |

| <b>RC<sub>gm</sub> MeMg(<math>\mu</math>-Cl)<sub>2</sub>MeMg</b> |                |           |           |
|------------------------------------------------------------------|----------------|-----------|-----------|
| Atom                                                             | Coordinate (Å) |           |           |
|                                                                  | x              | y         | z         |
| C                                                                | -3.749766      | -0.135083 | -1.154969 |
| C                                                                | -5.071160      | -0.550953 | -1.202781 |
| C                                                                | -5.731875      | -0.909621 | -0.030111 |
| C                                                                | -5.078726      | -0.855614 | 1.199059  |
| C                                                                | -3.757321      | -0.441834 | 1.266188  |
| C                                                                | -3.097210      | -0.082340 | 0.084131  |
| H                                                                | -3.218930      | 0.148960  | -2.059034 |
| H                                                                | -5.587813      | -0.595069 | -2.156884 |
| H                                                                | -6.767833      | -1.234577 | -0.074532 |
| H                                                                | -5.601819      | -1.136802 | 2.108174  |
| H                                                                | -3.233634      | -0.393258 | 2.216513  |
| C                                                                | -1.742139      | 0.348026  | 0.135657  |
| N                                                                | -0.638158      | 0.700845  | 0.162636  |
| Mg                                                               | 1.362401       | 1.523342  | -0.034986 |
| Cl                                                               | 2.532090       | 0.183559  | 1.717746  |
| C                                                                | 1.442620       | 3.621088  | -0.157312 |
| H                                                                | 0.791047       | 4.089191  | 0.595587  |
| H                                                                | 2.446292       | 4.037672  | 0.008725  |
| H                                                                | 1.109743       | 4.004864  | -1.132542 |
| Mg                                                               | 3.538484       | -1.222518 | -0.032572 |
| Cl                                                               | 2.121353       | -0.156366 | -1.728699 |
| C                                                                | 5.151038       | -2.563146 | -0.053338 |
| H                                                                | 5.385208       | -2.922819 | -1.064614 |
| H                                                                | 6.070177       | -2.104925 | 0.336799  |
| H                                                                | 4.962741       | -3.454469 | 0.561113  |

| <b>TS<sub>gm</sub> MeMg(<math>\mu</math>-Cl)<sub>2</sub>MeMg</b> |                |           |           |
|------------------------------------------------------------------|----------------|-----------|-----------|
| Atom                                                             | Coordinate (Å) |           |           |
|                                                                  | x              | y         | z         |
| C                                                                | -3.720046      | -1.240782 | -0.376597 |
| C                                                                | -5.100312      | -1.120078 | -0.274509 |
| C                                                                | -5.677021      | 0.130009  | -0.072608 |
| C                                                                | -4.872685      | 1.262678  | 0.025750  |
| C                                                                | -3.491814      | 1.149309  | -0.061727 |
| C                                                                | -2.912606      | -0.105327 | -0.262051 |
| H                                                                | -3.256792      | -2.209834 | -0.545957 |
| H                                                                | -5.726388      | -2.004577 | -0.356804 |
| H                                                                | -6.757162      | 0.223599  | 0.005305  |
| H                                                                | -5.323577      | 2.240464  | 0.172921  |
| H                                                                | -2.862064      | 2.031645  | 0.010840  |
| C                                                                | -1.473848      | -0.293539 | -0.433539 |
| N                                                                | -0.648261      | -0.781467 | -1.160000 |
| Mg                                                               | 0.785721       | -0.162722 | 0.179648  |
| Cl                                                               | 2.306870       | 1.708652  | -0.105576 |
| C                                                                | -0.837283      | 0.614770  | 1.475898  |
| H                                                                | -1.608331      | 0.094623  | 2.049236  |
| H                                                                | 0.048221       | 0.650071  | 2.147676  |
| H                                                                | -1.136551      | 1.658745  | 1.340375  |
| Mg                                                               | 4.192177       | 0.097878  | -0.066461 |
| Cl                                                               | 2.597727       | -1.689096 | 0.662020  |
| C                                                                | 6.155444       | 0.094225  | -0.800335 |
| H                                                                | 6.611924       | -0.904118 | -0.764893 |
| H                                                                | 6.202001       | 0.423941  | -1.847021 |

|   |          |          |           |
|---|----------|----------|-----------|
| H | 6.814630 | 0.763783 | -0.231173 |
|---|----------|----------|-----------|

| <b>PR<sub>gm</sub> MeMg(<math>\mu</math>-Cl)<sub>2</sub>MeMg</b> |                |           |           |
|------------------------------------------------------------------|----------------|-----------|-----------|
| Atom                                                             | Coordinate (Å) |           |           |
|                                                                  | x              | y         | z         |
| C                                                                | 3.319918       | -1.233286 | 0.070506  |
| C                                                                | 4.558726       | -1.801089 | 0.328341  |
| C                                                                | 5.666201       | -0.986507 | 0.560594  |
| C                                                                | 5.517008       | 0.395261  | 0.532907  |
| C                                                                | 4.269949       | 0.960049  | 0.277435  |
| C                                                                | 3.150564       | 0.155055  | 0.040674  |
| H                                                                | 2.441702       | -1.848004 | -0.115168 |
| H                                                                | 4.666121       | -2.883711 | 0.350092  |
| H                                                                | 6.639347       | -1.428337 | 0.762758  |
| H                                                                | 6.374620       | 1.040297  | 0.711751  |
| H                                                                | 4.178640       | 2.043649  | 0.262148  |
| C                                                                | 1.778848       | 0.719888  | -0.243004 |
| N                                                                | 0.805551       | -0.037194 | -0.523050 |
| Mg                                                               | -1.102848      | 0.019818  | -0.902472 |
| Cl                                                               | -2.803666      | 1.678256  | -0.186988 |
| C                                                                | 1.686709       | 2.235837  | -0.161985 |
| H                                                                | 2.326950       | 2.720447  | -0.911332 |
| H                                                                | 0.654165       | 2.554687  | -0.332581 |
| H                                                                | 2.008794       | 2.612219  | 0.817886  |
| Mg                                                               | -4.328347      | -0.187151 | 0.375291  |
| Cl                                                               | -2.780323      | -1.760634 | -0.749818 |
| C                                                                | -5.950608      | -0.409425 | 1.683523  |
| H                                                                | -6.224399      | -1.462642 | 1.832464  |
| H                                                                | -5.733578      | 0.002413  | 2.678415  |
| H                                                                | -6.852942      | 0.103056  | 1.322841  |

| <b>RC<sub>vi</sub> MeMg(<math>\mu</math>-Cl)<sub>2</sub>MeMg</b> |                |           |           |
|------------------------------------------------------------------|----------------|-----------|-----------|
| Atom                                                             | Coordinate (Å) |           |           |
|                                                                  | x              | y         | z         |
| C                                                                | 2.685011       | -0.653821 | 0.031202  |
| C                                                                | 4.025776       | -0.983246 | 0.158052  |
| C                                                                | 4.997919       | 0.012803  | 0.100861  |
| C                                                                | 4.640593       | 1.346557  | -0.084708 |
| C                                                                | 3.305369       | 1.695981  | -0.212814 |
| C                                                                | 2.332326       | 0.690238  | -0.153585 |
| H                                                                | 1.911311       | -1.419100 | 0.072888  |
| H                                                                | 4.313281       | -2.020395 | 0.302834  |
| H                                                                | 6.046660       | -0.253124 | 0.202663  |
| H                                                                | 5.405595       | 2.116070  | -0.127393 |
| H                                                                | 3.008018       | 2.730908  | -0.354811 |
| C                                                                | 0.954732       | 1.026652  | -0.261446 |
| N                                                                | -0.176172      | 1.274358  | -0.334283 |
| Mg                                                               | -2.333619      | 1.291561  | -0.014168 |
| Cl                                                               | -2.063171      | -0.417538 | 1.841154  |
| C                                                                | -3.383419      | 3.106204  | 0.121860  |
| H                                                                | -3.110882      | 3.801075  | -0.685860 |
| H                                                                | -4.474003      | 2.982274  | 0.065461  |
| H                                                                | -3.182009      | 3.634398  | 1.064815  |
| Mg                                                               | -1.585027      | -2.055377 | 0.093592  |
| Cl                                                               | -2.668344      | -0.631730 | -1.580425 |
| C                                                                | 0.050958       | -3.349394 | -0.178641 |
| H                                                                | 0.735819       | -3.366727 | 0.681656  |
| H                                                                | -0.270950      | -4.389217 | -0.333023 |
| H                                                                | 0.654284       | -3.085166 | -1.059413 |

| <b>TS<sub>vi</sub> MeMg(<math>\mu</math>-Cl)<sub>2</sub>MeMg</b> |                |           |           |
|------------------------------------------------------------------|----------------|-----------|-----------|
| Atom                                                             | Coordinate (Å) |           |           |
|                                                                  | x              | y         | z         |
| C                                                                | 3.106387       | -0.576662 | -0.997119 |
| C                                                                | 4.453772       | -0.254605 | -0.909793 |

|    |           |           |           |
|----|-----------|-----------|-----------|
| C  | 4.891157  | 0.692127  | 0.013014  |
| C  | 3.976520  | 1.334599  | 0.841530  |
| C  | 2.624704  | 1.029230  | 0.752356  |
| C  | 2.188674  | 0.064747  | -0.162667 |
| H  | 2.767201  | -1.309496 | -1.723637 |
| H  | 5.166754  | -0.747673 | -1.564818 |
| H  | 5.948861  | 0.932129  | 0.083162  |
| H  | 4.314283  | 2.078875  | 1.557525  |
| H  | 1.897929  | 1.530830  | 1.386787  |
| C  | 0.747372  | -0.165989 | -0.219063 |
| N  | -0.296690 | 0.411399  | -0.316148 |
| Mg | -2.321125 | 1.133965  | -0.454043 |
| Cl | -2.355990 | 0.117978  | 2.009814  |
| C  | -3.107390 | 2.935164  | -1.184020 |
| H  | -2.862063 | 3.079580  | -2.245969 |
| H  | -4.201994 | 2.989264  | -1.107649 |
| H  | -2.711962 | 3.811358  | -0.651525 |
| Mg | -1.167236 | -1.437422 | 0.613821  |
| Cl | -2.795901 | -1.292003 | -1.179782 |
| C  | 0.810444  | -2.322035 | 0.189222  |
| H  | 1.569283  | -2.345745 | 0.976152  |
| H  | 0.188464  | -3.234765 | 0.311320  |
| H  | 1.292717  | -2.483699 | -0.776975 |

| <b>PR<sub>vi</sub> MeMg(μ-Cl)<sub>2</sub>MeMg</b> |                |           |           |
|---------------------------------------------------|----------------|-----------|-----------|
| Atom                                              | Coordinate (Å) |           |           |
|                                                   | x              | y         | z         |
| C                                                 | 2.796366       | -1.190519 | -0.985901 |
| C                                                 | 4.114030       | -0.794767 | -0.783946 |
| C                                                 | 4.476756       | -0.143096 | 0.391687  |
| C                                                 | 3.515858       | 0.115971  | 1.364112  |
| C                                                 | 2.192667       | -0.252405 | 1.149037  |
| C                                                 | 1.817586       | -0.902752 | -0.030102 |
| H                                                 | 2.522089       | -1.701797 | -1.907012 |
| H                                                 | 4.861642       | -0.997659 | -1.546945 |
| H                                                 | 5.509038       | 0.158321  | 0.551010  |
| H                                                 | 3.795359       | 0.612218  | 2.290316  |
| H                                                 | 1.440155       | -0.058160 | 1.913068  |
| C                                                 | 0.376531       | -1.234067 | -0.270775 |
| N                                                 | -0.531167      | -0.348632 | -0.131733 |
| Mg                                                | -0.113355      | 1.704620  | 0.032415  |
| Cl                                                | -4.156589      | -1.418227 | 0.877534  |
| C                                                 | 1.475038       | 3.071479  | 0.178988  |
| H                                                 | 2.328615       | 2.730336  | -0.426023 |
| H                                                 | 1.240576       | 4.093757  | -0.148171 |
| H                                                 | 1.846345       | 3.145929  | 1.211560  |
| Mg                                                | -2.560417      | -0.356244 | -0.404946 |
| Cl                                                | -2.506286      | 2.083557  | -0.645214 |
| C                                                 | 0.122431       | -2.659921 | -0.691039 |
| H                                                 | 0.701413       | -3.361630 | -0.079891 |
| H                                                 | -0.938392      | -2.916976 | -0.617148 |
| H                                                 | 0.441889       | -2.814569 | -1.730064 |

| <b>RC<sub>gm</sub> MeMg(μ-Cl)(μ-Me)MgCl</b> |                |           |           |
|---------------------------------------------|----------------|-----------|-----------|
| Atom                                        | Coordinate (Å) |           |           |
|                                             | x              | y         | z         |
| C                                           | -2.731399      | 0.640209  | 0.059770  |
| C                                           | -4.088988      | 0.920756  | 0.020331  |
| C                                           | -5.018045      | -0.116906 | 0.027125  |
| C                                           | -4.600832      | -1.445633 | 0.074227  |
| C                                           | -3.248608      | -1.746839 | 0.114864  |
| C                                           | -2.319390      | -0.698346 | 0.107263  |
| H                                           | -1.985718      | 1.434290  | 0.049313  |
| H                                           | -4.423606      | 1.953252  | -0.017581 |
| H                                           | -6.079988      | 0.111820  | -0.005776 |

|    |           |           |           |
|----|-----------|-----------|-----------|
| H  | -5.332503 | -2.248114 | 0.077961  |
| H  | -2.904836 | -2.776560 | 0.150040  |
| C  | -0.927356 | -0.991064 | 0.132880  |
| N  | 0.209525  | -1.222206 | 0.145125  |
| Mg | 2.370983  | -1.341514 | -0.170100 |
| C  | 3.205985  | -3.251027 | -0.430117 |
| H  | 2.938839  | -3.695393 | -1.400423 |
| H  | 4.304204  | -3.264568 | -0.380464 |
| H  | 2.856817  | -3.958214 | 0.336803  |
| Mg | 2.084353  | 1.614561  | -0.277133 |
| Cl | 2.870789  | 0.345578  | 1.629162  |
| C  | 2.392107  | 0.171893  | -1.901116 |
| H  | 3.361705  | -0.276218 | -2.170516 |
| H  | 1.609722  | -0.479297 | -2.322770 |
| H  | 2.341115  | 1.052980  | -2.560709 |
| Cl | 0.211722  | 2.979519  | -0.254828 |

| <b>TS<sub>gm</sub> MeMg(μ-Cl)(μ-Me)MgCl</b> |                |           |           |
|---------------------------------------------|----------------|-----------|-----------|
| Atom                                        | Coordinate (Å) |           |           |
|                                             | x              | y         | z         |
| C                                           | 3.560634       | -1.287141 | 0.157387  |
| C                                           | 4.891511       | -1.462465 | -0.198026 |
| C                                           | 5.702025       | -0.355857 | -0.438377 |
| C                                           | 5.183541       | 0.930223  | -0.317549 |
| C                                           | 3.854908       | 1.115183  | 0.044925  |
| C                                           | 3.045068       | 0.003800  | 0.285342  |
| H                                           | 2.916584       | -2.144600 | 0.340548  |
| H                                           | 5.297099       | -2.466455 | -0.290736 |
| H                                           | 6.741665       | -0.497063 | -0.722437 |
| H                                           | 5.815985       | 1.793769  | -0.505837 |
| H                                           | 3.438924       | 2.115310  | 0.143117  |
| C                                           | 1.658524       | 0.207151  | 0.699050  |
| N                                           | 0.938383       | 0.488301  | 1.620701  |
| Mg                                          | -0.655933      | 0.265991  | 0.327076  |
| Cl                                          | -2.371967      | 1.893718  | -0.178771 |
| C                                           | 0.815674       | -0.181649 | -1.288600 |
| H                                           | 1.188563       | -1.203292 | -1.418391 |
| H                                           | -0.140465      | -0.129677 | -1.852071 |
| H                                           | 1.494493       | 0.507942  | -1.797627 |
| Mg                                          | -3.561819      | -0.244110 | 0.098492  |
| Cl                                          | -5.775178      | -0.688591 | -0.291940 |
| C                                           | -1.866761      | -1.624255 | 0.420904  |
| H                                           | -1.010771      | -1.829028 | 1.086766  |
| H                                           | -2.634929      | -2.250649 | 0.901720  |
| H                                           | -1.632069      | -2.134037 | -0.525021 |

| <b>PR<sub>gm</sub> MeMg(μ-Cl)(μ-Me)MgCl</b> |                |           |           |
|---------------------------------------------|----------------|-----------|-----------|
| Atom                                        | Coordinate (Å) |           |           |
|                                             | x              | y         | z         |
| C                                           | -3.337385      | -1.246308 | 0.255354  |
| C                                           | -4.571295      | -1.865695 | 0.122354  |
| C                                           | -5.666769      | -1.146556 | -0.353781 |
| C                                           | -5.510599      | 0.191967  | -0.694587 |
| C                                           | -4.268193      | 0.807343  | -0.564060 |
| C                                           | -3.160966      | 0.098924  | -0.084994 |
| H                                           | -2.469383      | -1.787169 | 0.626063  |
| H                                           | -4.684132      | -2.914726 | 0.388581  |
| H                                           | -6.635923      | -1.628952 | -0.459166 |
| H                                           | -6.358772      | 0.763007  | -1.066161 |
| H                                           | -4.170522      | 1.855058  | -0.838928 |
| C                                           | -1.795435      | 0.724049  | 0.075734  |
| N                                           | -0.839513      | 0.084618  | 0.602682  |
| Mg                                          | 1.059339       | 0.289171  | 1.005177  |
| Cl                                          | 2.790102       | 1.891112  | 0.233440  |
| C                                           | -1.686799      | 2.150572  | -0.440713 |

|    |           |           |           |
|----|-----------|-----------|-----------|
| H  | -2.337271 | 2.833965  | 0.121625  |
| H  | -0.654925 | 2.501325  | -0.345546 |
| H  | -1.984645 | 2.228173  | -1.494609 |
| Mg | 3.853191  | -0.318105 | 0.255428  |
| Cl | 5.122069  | -1.196450 | -1.450412 |
| C  | 2.424315  | -1.444210 | 1.533910  |
| H  | 1.423606  | -1.907289 | 1.555780  |
| H  | 3.017960  | -2.299331 | 1.171880  |
| H  | 2.712085  | -1.318958 | 2.587675  |

**RC<sub>vi</sub>\_MgCl(μ-Cl)(μ-Me)MeMg**

| Atom | Coordinate (Å) |           |           |
|------|----------------|-----------|-----------|
|      | x              | y         | z         |
| C    | -3.191937      | -1.778676 | -0.157018 |
| C    | -2.370971      | -0.643952 | -0.126461 |
| C    | -2.908716      | 0.639398  | 0.043469  |
| C    | -4.280976      | 0.777279  | 0.184664  |
| C    | -5.102290      | -0.347444 | 0.156778  |
| C    | -4.561508      | -1.619942 | -0.014669 |
| H    | -2.752475      | -2.763274 | -0.287658 |
| H    | -2.250460      | 1.506008  | 0.059677  |
| H    | -4.711532      | 1.765194  | 0.318236  |
| H    | -6.176745      | -0.231165 | 0.270500  |
| H    | -5.209880      | -2.490762 | -0.035012 |
| C    | -0.961718      | -0.788658 | -0.246396 |
| N    | 0.190527       | -0.895189 | -0.328307 |
| Mg   | 2.317722       | -0.578473 | -0.098385 |
| Cl   | 2.002022       | 0.925737  | 1.828184  |
| Mg   | 1.534375       | 2.267378  | -0.227481 |
| C    | -0.262830      | 3.277199  | -0.643314 |
| H    | -0.891113      | 3.391859  | 0.252937  |
| H    | -0.134285      | 4.287901  | -1.055587 |
| H    | -0.864968      | 2.725057  | -1.381622 |
| C    | 2.679055       | 0.981382  | -1.662987 |
| H    | 3.344730       | 0.165721  | -1.994902 |
| H    | 1.959480       | 1.079588  | -2.490537 |
| H    | 3.359889       | 1.847084  | -1.742698 |
| Cl   | 3.441498       | -2.588282 | -0.116959 |

**TS<sub>vi</sub>\_MgCl(μ-Cl)(μ-Me)MeMg**

| Atom | Coordinate (Å) |           |           |
|------|----------------|-----------|-----------|
|      | x              | y         | z         |
| C    | -2.664139      | 1.459410  | 0.365304  |
| C    | -2.260199      | 0.169757  | 0.004081  |
| C    | -3.182957      | -0.730146 | -0.531332 |
| C    | -4.504805      | -0.339739 | -0.699260 |
| C    | -4.912215      | 0.937186  | -0.322313 |
| C    | -3.991556      | 1.835645  | 0.208546  |
| H    | -1.931550      | 2.155032  | 0.767203  |
| H    | -2.861258      | -1.723598 | -0.830628 |
| H    | -5.221253      | -1.037177 | -1.124753 |
| H    | -5.950421      | 1.233829  | -0.446754 |
| H    | -4.305672      | 2.834984  | 0.497615  |
| C    | -0.837647      | -0.131333 | 0.146564  |
| N    | 0.237791       | 0.344072  | -0.078499 |
| Mg   | 2.358332       | 0.498082  | -0.026436 |
| Cl   | 2.312908       | -1.454832 | -1.628490 |
| Mg   | 0.967997       | -1.810440 | 0.423355  |
| C    | -1.046727      | -1.961742 | 1.335542  |
| H    | -1.801531      | -2.587020 | 0.852380  |
| H    | -0.435473      | -2.637690 | 1.969332  |
| H    | -1.546868      | -1.319039 | 2.065040  |
| C    | 2.414178       | -0.856704 | 1.817376  |
| H    | 2.584572       | 0.141239  | 2.258543  |
| H    | 1.815207       | -1.329429 | 2.614162  |

|    |          |           |           |
|----|----------|-----------|-----------|
| H  | 3.391668 | -1.358427 | 1.850831  |
| Cl | 3.604651 | 2.435603  | -0.055836 |

**PR<sub>vi</sub>\_MgCl(μ-Cl)(μ-Me)MeMg**

| Atom | Coordinate (Å) |           |           |
|------|----------------|-----------|-----------|
|      | x              | y         | z         |
| C    | 2.093881       | -0.306831 | 1.086124  |
| C    | 1.729313       | -1.056207 | -0.037514 |
| C    | 2.740386       | -1.582073 | -0.848609 |
| C    | 4.077741       | -1.328026 | -0.565687 |
| C    | 4.426010       | -0.574189 | 0.550860  |
| C    | 3.429933       | -0.069962 | 1.382413  |
| H    | 1.313343       | 0.066956  | 1.747684  |
| H    | 2.484592       | -2.176088 | -1.723377 |
| H    | 4.851669       | -1.723682 | -1.218797 |
| H    | 5.472527       | -0.385866 | 0.777149  |
| H    | 3.694890       | 0.502243  | 2.268022  |
| C    | 0.280158       | -1.290847 | -0.329056 |
| N    | -0.603017      | -0.395380 | -0.120124 |
| Mg   | -0.594476      | 1.651628  | -0.013058 |
| Cl   | -4.356078      | -1.548453 | 0.655988  |
| Mg   | -2.645916      | -0.266027 | -0.216639 |
| C    | -0.047487      | -2.657963 | -0.877126 |
| H    | 0.412511       | -3.453035 | -0.279114 |
| H    | -1.129257      | -2.815048 | -0.919556 |
| H    | 0.346982       | -2.764766 | -1.895853 |
| C    | -2.762759      | 2.002042  | -0.416770 |
| H    | -2.810311      | 2.751523  | 0.389356  |
| H    | -2.528744      | 2.563858  | -1.335415 |
| H    | -3.825171      | 1.743370  | -0.553262 |
| Cl   | 0.769003       | 3.490530  | -0.263483 |

**RC<sub>qm</sub>\_MeMg(μ-Cl)<sub>2</sub>MeMg<sub>THF3</sub>**

| Atom | Coordinate (Å) |           |           |
|------|----------------|-----------|-----------|
|      | x              | y         | z         |
| C    | 5.118964       | 0.287637  | -2.013290 |
| C    | 6.438152       | -0.011319 | -2.319429 |
| C    | 7.271696       | -0.564605 | -1.350140 |
| C    | 6.794490       | -0.823408 | -0.067272 |
| C    | 5.478452       | -0.529168 | 0.255342  |
| C    | 4.643532       | 0.027138  | -0.722591 |
| H    | 4.455336       | 0.717534  | -2.758106 |
| H    | 6.818053       | 0.186747  | -3.317413 |
| H    | 8.304215       | -0.796708 | -1.597230 |
| H    | 7.450332       | -1.254985 | 0.683122  |
| H    | 5.086604       | -0.722107 | 1.250992  |
| C    | 3.289752       | 0.317391  | -0.384449 |
| N    | 2.189256       | 0.529285  | -0.081522 |
| Mg   | 0.276666       | 0.496482  | 1.183143  |
| Cl   | -2.194017      | 0.126172  | 1.973965  |
| C    | 1.468966       | 0.264618  | 2.937595  |
| H    | 2.080638       | 1.168019  | 3.110162  |
| H    | 0.931948       | 0.083624  | 3.882983  |
| H    | 2.195762       | -0.563269 | 2.840693  |
| Mg   | -2.312888      | -1.085176 | -0.169002 |
| Cl   | -0.928745      | 0.514006  | -1.393787 |
| O    | -4.129415      | -0.118340 | -0.711562 |
| C    | -4.475551      | -0.096932 | -2.112944 |
| C    | -5.305312      | -0.395775 | 0.081234  |
| C    | -5.985611      | 0.012156  | -2.142238 |
| H    | -3.945701      | 0.740140  | -2.576975 |
| H    | -4.129855      | -1.035800 | -2.573593 |
| C    | -6.374003      | -0.802571 | -0.914118 |
| H    | -5.059166      | -1.177793 | 0.809112  |
| H    | -5.571491      | 0.518681  | 0.626998  |

|   |           |           |           |
|---|-----------|-----------|-----------|
| H | -6.412417 | -0.369074 | -3.073823 |
| H | -6.296012 | 1.057690  | -2.023238 |
| H | -6.302327 | -1.875769 | -1.132927 |
| H | -7.383239 | -0.594337 | -0.548731 |
| O | -0.011687 | 2.582901  | 0.965310  |
| C | -1.289876 | 3.233553  | 0.767448  |
| C | 1.048625  | 3.422440  | 0.465373  |
| C | -0.992067 | 4.420850  | -0.124210 |
| H | -1.978592 | 2.504877  | 0.329045  |
| H | -1.669520 | 3.538826  | 1.751525  |
| C | 0.422097  | 4.791042  | 0.305672  |
| H | 1.880672  | 3.378859  | 1.176447  |
| H | 1.388106  | 3.022505  | -0.501474 |
| H | -1.717504 | 5.229136  | 0.002558  |
| H | -0.998844 | 4.110954  | -1.177582 |
| H | 0.405772  | 5.321748  | 1.265837  |
| H | 0.955895  | 5.409514  | -0.421161 |
| C | -2.796441 | -3.099715 | -0.633597 |
| H | -2.549135 | -3.341896 | -1.680950 |
| H | -2.288290 | -3.866769 | -0.026961 |
| H | -3.875672 | -3.304302 | -0.533185 |
| O | -0.086079 | -1.680920 | 0.621320  |
| C | -0.102038 | -2.562172 | 1.788003  |
| C | 0.697376  | -2.322167 | -0.417952 |
| C | 0.861996  | -3.699194 | 1.472698  |
| H | 0.216239  | -1.955669 | 2.641943  |
| H | -1.131185 | -2.902058 | 1.946014  |
| C | 1.717084  | -3.132144 | 0.344367  |
| H | 0.025749  | -2.962785 | -1.008710 |
| H | 1.099326  | -1.533985 | -1.058533 |
| H | 0.313015  | -4.580017 | 1.117611  |
| H | 1.442520  | -3.995286 | 2.350897  |
| H | 2.189595  | -3.902499 | -0.271440 |
| H | 2.501753  | -2.472500 | 0.740495  |

**TS<sub>qm</sub>-MeMg(μ-Cl)<sub>2</sub>MeMg<sub>THF3</sub>**

| Atom | Coordinate (Å) |           |           |
|------|----------------|-----------|-----------|
|      | x              | y         | z         |
| C    | 5.176801       | 0.998786  | -0.410351 |
| C    | 6.529420       | 0.823840  | -0.142810 |
| C    | 6.982708       | -0.372991 | 0.403202  |
| C    | 6.082898       | -1.398018 | 0.687333  |
| C    | 4.729033       | -1.226342 | 0.435058  |
| C    | 4.275579       | -0.028149 | -0.120568 |
| H    | 4.809447       | 1.925176  | -0.847061 |
| H    | 7.230968       | 1.623673  | -0.364790 |
| H    | 8.041237       | -0.508674 | 0.609582  |
| H    | 6.438138       | -2.333159 | 1.111984  |
| H    | 4.016113       | -2.015975 | 0.666846  |
| C    | 2.875806       | 0.173120  | -0.465688 |
| N    | 2.066855       | 0.365287  | -1.321918 |
| Mg   | 0.519177       | 0.376367  | 0.176622  |
| Cl   | -1.379502      | -0.037811 | 1.890381  |
| C    | 2.198758       | 0.288349  | 1.712291  |
| H    | 2.851724       | 1.157881  | 1.869194  |
| H    | 1.323629       | 0.444526  | 2.371301  |
| H    | 2.723451       | -0.590285 | 2.104220  |
| Mg   | -2.412680      | -1.077772 | -0.099368 |
| Cl   | -1.430401      | 0.555723  | -1.635476 |
| O    | -4.210465      | -0.004405 | 0.130110  |
| C    | -5.075163      | 0.126698  | -1.020819 |
| C    | -5.004434      | -0.180870 | 1.325681  |
| C    | -6.455757      | 0.372550  | -0.449174 |
| H    | -4.686059      | 0.937738  | -1.643441 |
| H    | -5.037313      | -0.812715 | -1.594042 |
| C    | -6.410059      | -0.453758 | 0.830570  |

|   |           |           |           |
|---|-----------|-----------|-----------|
| H | -4.573198 | -0.999240 | 1.912962  |
| H | -4.942965 | 0.742913  | 1.915437  |
| H | -7.249399 | 0.070460  | -1.137583 |
| H | -6.589412 | 1.435763  | -0.214542 |
| H | -6.532025 | -1.519863 | 0.599486  |
| H | -7.171031 | -0.172485 | 1.563375  |
| O | 0.357300  | 2.461205  | 0.318493  |
| C | -0.866904 | 3.161213  | 0.654323  |
| C | 1.186743  | 3.296393  | -0.521149 |
| C | -0.888738 | 4.369798  | -0.256776 |
| H | -1.705429 | 2.473287  | 0.506852  |
| H | -0.815096 | 3.440713  | 1.714837  |
| C | 0.595196  | 4.684236  | -0.399308 |
| H | 2.220957  | 3.209261  | -0.169700 |
| H | 1.129819  | 2.918104  | -1.551707 |
| H | -1.475001 | 5.193379  | 0.159754  |
| H | -1.315452 | 4.098349  | -1.231095 |
| H | 0.969949  | 5.185102  | 0.502048  |
| H | 0.830577  | 5.310602  | -1.263997 |
| C | -3.017260 | -3.079802 | -0.407018 |
| H | -3.120507 | -3.325078 | -1.476359 |
| H | -2.333442 | -3.837808 | 0.007150  |
| H | -4.003418 | -3.286409 | 0.041208  |
| O | 0.093560  | -1.746349 | -0.213013 |
| C | 0.484848  | -2.705240 | 0.815528  |
| C | 0.393871  | -2.310389 | -1.520715 |
| C | 1.037379  | -3.909965 | 0.072843  |
| H | 1.240702  | -2.216461 | 1.442924  |
| H | -0.394967 | -2.929298 | 1.426899  |
| C | 1.491642  | -3.309945 | -1.252375 |
| H | -0.518318 | -2.794598 | -1.897562 |
| H | 0.671262  | -1.484834 | -2.179973 |
| H | 0.245124  | -4.648553 | -0.102111 |
| H | 1.840463  | -4.399547 | 0.631418  |
| H | 1.590592  | -4.047378 | -2.053576 |
| H | 2.453943  | -2.789915 | -1.142127 |

**PR<sub>qm</sub>-MeMg(μ-Cl)<sub>2</sub>MeMg<sub>THF3</sub>**

| Atom | Coordinate (Å) |           |           |
|------|----------------|-----------|-----------|
|      | x              | y         | z         |
| C    | 4.656805       | -0.465504 | -1.138312 |
| C    | 5.883098       | -0.839566 | -1.667931 |
| C    | 7.028890       | -0.799660 | -0.874338 |
| C    | 6.929580       | -0.382794 | 0.448146  |
| C    | 5.695409       | -0.008753 | 0.974796  |
| C    | 4.537411       | -0.042918 | 0.190742  |
| H    | 3.747704       | -0.486543 | -1.737501 |
| H    | 5.951007       | -1.164357 | -2.704424 |
| H    | 7.992325       | -1.092309 | -1.285844 |
| H    | 7.817012       | -0.347716 | 1.076770  |
| H    | 5.643515       | 0.312935  | 2.012635  |
| C    | 3.173386       | 0.342937  | 0.716649  |
| N    | 2.147976       | 0.308674  | -0.019829 |
| Mg   | 0.199272       | 0.572573  | 0.160920  |
| Cl   | -1.553211      | 0.191339  | 1.897212  |
| C    | 3.149019       | 0.759507  | 2.182406  |
| H    | 3.796080       | 1.626833  | 2.373905  |
| H    | 2.125163       | 1.025756  | 2.467858  |
| H    | 3.496186       | -0.044718 | 2.846154  |
| Mg   | -2.407586      | -1.188876 | -0.027386 |
| Cl   | -1.490023      | 0.495920  | -1.676515 |
| O    | -4.271637      | -0.186367 | -0.011316 |
| C    | -5.043488      | -0.167398 | -1.234468 |
| C    | -5.149518      | -0.388517 | 1.120586  |
| C    | -6.482413      | -0.013313 | -0.788893 |
| H    | -4.665887      | 0.648509  | -1.857714 |

|   |           |           |           |
|---|-----------|-----------|-----------|
| H | -4.885490 | -1.121655 | -1.761065 |
| C | -6.482189 | -0.789751 | 0.522318  |
| H | -4.711165 | -1.153332 | 1.772359  |
| H | -5.209816 | 0.555461  | 1.677404  |
| H | -7.188675 | -0.401202 | -1.527680 |
| H | -6.716837 | 1.043189  | -0.609461 |
| H | -6.499592 | -1.869377 | 0.324503  |
| H | -7.322667 | -0.547021 | 1.177916  |
| O | 0.089264  | 2.644341  | 0.336018  |
| C | -1.152934 | 3.386888  | 0.385905  |
| C | 1.095827  | 3.410927  | -0.370557 |
| C | -0.987826 | 4.480444  | -0.646364 |
| H | -1.972960 | 2.691258  | 0.179862  |
| H | -1.270106 | 3.789036  | 1.400840  |
| C | 0.498946  | 4.794375  | -0.528501 |
| H | 2.021902  | 3.372796  | 0.211127  |
| H | 1.273117  | 2.931667  | -1.344497 |
| H | -1.635545 | 5.339592  | -0.452285 |
| H | -1.218595 | 4.090248  | -1.646500 |
| H | 0.691238  | 5.400628  | 0.365425  |
| H | 0.906716  | 5.322580  | -1.394426 |
| C | -2.991072 | -3.216978 | -0.133777 |
| H | -3.002505 | -3.594464 | -1.168989 |
| H | -2.334817 | -3.903676 | 0.424148  |
| H | -4.009005 | -3.384075 | 0.255049  |
| O | -0.087287 | -1.656175 | -0.029448 |
| C | 0.429088  | -2.408038 | 1.111539  |
| C | 0.424107  | -2.254633 | -1.260273 |
| C | 1.059959  | -3.649332 | 0.520470  |
| H | 1.172613  | -1.773182 | 1.612767  |
| H | -0.402774 | -2.603419 | 1.794301  |
| C | 1.569628  | -3.134029 | -0.818423 |
| H | -0.394950 | -2.834371 | -1.709221 |
| H | 0.710169  | -1.443150 | -1.934432 |
| H | 0.301254  | -4.427996 | 0.367964  |
| H | 1.844884  | -4.054539 | 1.164781  |
| H | 1.784549  | -3.926071 | -1.540901 |
| H | 2.471883  | -2.523561 | -0.678625 |

**RC<sub>vi</sub> MeMg(μ-Cl)<sub>2</sub>MeMg<sub>THF</sub>3**

| Atom | Coordinate (Å) |           |           |
|------|----------------|-----------|-----------|
|      | x              | y         | z         |
| Mg   | 1.831333       | -0.834048 | -1.570326 |
| Mg   | 0.489786       | 2.328667  | 0.530652  |
| O    | 0.474936       | -2.521293 | -1.726524 |
| C    | -0.848926      | -2.607901 | -1.152257 |
| C    | 1.137553       | -3.802618 | -1.609177 |
| C    | -0.842520      | -3.878106 | -0.329459 |
| H    | -1.038927      | -1.690027 | -0.582033 |
| H    | -1.577713      | -2.669859 | -1.974084 |
| C    | 0.061026       | -4.774217 | -1.167914 |
| H    | 1.598062       | -4.041493 | -2.572582 |
| H    | 1.932770       | -3.713560 | -0.855166 |
| H    | -1.847202      | -4.282982 | -0.180291 |
| H    | -0.394569      | -3.694627 | 0.656475  |
| H    | -0.488471      | -5.162168 | -2.034721 |
| H    | 0.473429       | -5.623785 | -0.616947 |
| O    | 0.071125       | 3.996301  | -0.663191 |
| C    | 0.272886       | 3.941481  | -2.096109 |
| C    | -1.139585      | 4.731549  | -0.370355 |
| C    | -0.795965      | 4.837790  | -2.692027 |
| H    | 1.299749       | 4.254035  | -2.311129 |
| H    | 0.151336       | 2.894742  | -2.411281 |
| C    | -1.918060      | 4.720009  | -1.666995 |
| H    | -1.648638      | 4.237001  | 0.464076  |
| H    | -0.862841      | 5.749207  | -0.064357 |

|    |           |           |           |
|----|-----------|-----------|-----------|
| H  | -1.085982 | 4.517110  | -3.697609 |
| H  | -0.442453 | 5.874174  | -2.754350 |
| H  | -2.442547 | 3.762021  | -1.778200 |
| H  | -2.651067 | 5.529117  | -1.723349 |
| N  | 1.498025  | -1.247494 | 0.612357  |
| C  | 1.079323  | -1.148381 | 1.689879  |
| C  | 0.510505  | -0.987955 | 2.984799  |
| C  | -0.871721 | -0.777320 | 3.077988  |
| C  | 1.322361  | -0.998875 | 4.124567  |
| C  | -1.438562 | -0.583117 | 4.328643  |
| H  | -1.469315 | -0.739861 | 2.168952  |
| C  | 0.738604  | -0.799373 | 5.366475  |
| H  | 2.392742  | -1.155817 | 4.027066  |
| C  | -0.635680 | -0.593635 | 5.467061  |
| H  | -2.508016 | -0.415291 | 4.415876  |
| H  | 1.357120  | -0.801501 | 6.259205  |
| H  | -1.085070 | -0.436104 | 6.443983  |
| C  | 0.625130  | 2.793499  | 2.589819  |
| H  | -0.044511 | 2.165884  | 3.200068  |
| H  | 1.634195  | 2.645994  | 3.005395  |
| H  | 0.356161  | 3.837803  | 2.816307  |
| Cl | 2.426521  | 1.555514  | -0.751788 |
| Cl | -1.317005 | 0.956962  | -0.257661 |
| O  | 0.759570  | 0.012846  | -3.181019 |
| C  | 1.396924  | 0.919260  | -4.107315 |
| C  | -0.604424 | -0.220455 | -3.571737 |
| C  | 0.319546  | 1.313882  | -5.110491 |
| H  | 1.773302  | 1.769868  | -3.524575 |
| H  | 2.252143  | 0.409287  | -4.566349 |
| C  | -0.979734 | 1.007202  | -4.370136 |
| H  | -0.655078 | -1.137733 | -4.176964 |
| H  | -1.192459 | -0.344583 | -2.656772 |
| H  | 0.390945  | 0.697722  | -6.014396 |
| H  | 0.407127  | 2.362256  | -5.412624 |
| H  | -1.825788 | 0.830664  | -5.040075 |
| H  | -1.252453 | 1.822811  | -3.685804 |
| C  | 3.641801  | -1.631861 | -2.324270 |
| H  | 4.123572  | -2.360894 | -1.652214 |
| H  | 3.504312  | -2.161548 | -3.282644 |
| H  | 4.403928  | -0.859695 | -2.518324 |

**TS<sub>vi</sub> MeMg(μ-Cl)<sub>2</sub>MeMg<sub>THF</sub>3**

| Atom | Coordinate (Å) |           |           |
|------|----------------|-----------|-----------|
|      | x              | y         | z         |
| Mg   | 2.129675       | -1.118118 | -1.611632 |
| Mg   | 0.627234       | 1.771476  | -0.481190 |
| O    | 0.821477       | -2.753395 | -1.227723 |
| C    | -0.261810      | -2.868679 | -0.277466 |
| C    | 0.893658       | -3.935033 | -2.046614 |
| C    | -0.799609      | -4.278162 | -0.451432 |
| H    | 0.131852       | -2.664570 | 0.723769  |
| H    | -1.007838      | -2.096433 | -0.517986 |
| C    | -0.469914      | -4.578274 | -1.909268 |
| H    | 1.151418       | -3.622224 | -3.064911 |
| H    | 1.693501       | -4.585762 | -1.664923 |
| H    | -1.866551      | -4.343843 | -0.222035 |
| H    | -0.266819      | -4.975685 | 0.206517  |
| H    | -1.191259      | -4.087562 | -2.575923 |
| H    | -0.456390      | -5.645936 | -2.144432 |
| O    | 0.043437       | 3.678277  | -1.124159 |
| C    | -0.100609      | 3.927952  | -2.542887 |
| C    | -0.998809      | 4.374982  | -0.395759 |
| C    | -1.010068      | 5.133316  | -2.632324 |
| H    | 0.900067       | 4.068936  | -2.961007 |
| H    | -0.561346      | 3.041059  | -3.006484 |
| C    | -1.948652      | 4.893575  | -1.456162 |

|    |           |           |           |
|----|-----------|-----------|-----------|
| H  | -1.467251 | 3.670941  | 0.301265  |
| H  | -0.525828 | 5.184687  | 0.174482  |
| H  | -1.523295 | 5.193757  | -3.595686 |
| H  | -0.437058 | 6.057533  | -2.487390 |
| H  | -2.685868 | 4.121499  | -1.710374 |
| H  | -2.484391 | 5.788931  | -1.129985 |
| N  | 1.452954  | -0.337777 | 0.271672  |
| C  | 1.110487  | 0.134128  | 1.308987  |
| C  | 0.585953  | -0.152628 | 2.638934  |
| C  | -0.795290 | -0.310717 | 2.779121  |
| C  | 1.436253  | -0.302168 | 3.734187  |
| C  | -1.321107 | -0.631658 | 4.023887  |
| H  | -1.437224 | -0.173537 | 1.909049  |
| C  | 0.898335  | -0.625414 | 4.974294  |
| H  | 2.508474  | -0.169400 | 3.609368  |
| C  | -0.476374 | -0.789580 | 5.119885  |
| H  | -2.394432 | -0.758042 | 4.139047  |
| H  | 1.556135  | -0.748327 | 5.830600  |
| H  | -0.891850 | -1.039608 | 6.092740  |
| C  | 1.098448  | 2.344965  | 1.617945  |
| H  | 0.191332  | 2.539014  | 2.204254  |
| H  | 1.917617  | 2.149862  | 2.316724  |
| H  | 1.385209  | 3.285809  | 1.106726  |
| Cl | 2.442818  | 1.574691  | -2.042528 |
| Cl | -1.507661 | 0.822375  | -0.923564 |
| O  | 1.082703  | -1.042601 | -3.462698 |
| C  | 1.634702  | -0.483866 | -4.663276 |
| C  | -0.326905 | -1.162022 | -3.703903 |
| C  | 0.631942  | 0.577612  | -5.090250 |
| H  | 2.629696  | -0.095830 | -4.427788 |
| H  | 1.725404  | -1.288765 | -5.408450 |
| C  | -0.703657 | 0.083953  | -4.499431 |
| H  | -0.502354 | -2.084341 | -4.280524 |
| H  | -0.828492 | -1.232800 | -2.733513 |
| H  | 0.602090  | 0.688688  | -6.177932 |
| H  | 0.912491  | 1.544351  | -4.657424 |
| H  | -1.444283 | -0.149064 | -5.270109 |
| H  | -1.141205 | 0.832319  | -3.828468 |
| C  | 4.018934  | -2.011987 | -1.927898 |
| H  | 4.074633  | -2.452358 | -2.938536 |
| H  | 4.886132  | -1.339279 | -1.847343 |
| H  | 4.214594  | -2.843533 | -1.231574 |

**PR<sub>vi</sub> MeMg(μ-Cl)<sub>2</sub>MeMg<sub>THF3</sub>**

| Atom | Coordinate (Å) |           |           |
|------|----------------|-----------|-----------|
|      | x              | y         | z         |
| Mg   | 1.175322       | -1.479420 | -0.919667 |
| Mg   | 0.337592       | 1.537942  | -2.168560 |
| O    | -0.701191      | -2.356081 | -0.948719 |
| C    | -1.983065      | -1.697318 | -0.805179 |
| C    | -0.828089      | -3.766644 | -0.642552 |
| C    | -2.825302      | -2.675082 | -0.015115 |
| H    | -1.811560      | -0.732852 | -0.312439 |
| H    | -2.386475      | -1.501158 | -1.807033 |
| C    | -2.319720      | -4.013174 | -0.542136 |
| H    | -0.326465      | -4.335178 | -1.432517 |
| H    | -0.314249      | -3.958005 | 0.310664  |
| H    | -3.896222      | -2.520067 | -0.169160 |
| H    | -2.615365      | -2.583810 | 1.059486  |
| H    | -2.743195      | -4.215913 | -1.533334 |
| H    | -2.554845      | -4.858284 | 0.109958  |
| O    | -0.616395      | 3.230043  | -1.345692 |
| C    | -0.902508      | 4.372890  | -2.188096 |
| C    | -1.699501      | 3.026705  | -0.410108 |
| C    | -2.034160      | 5.096647  | -1.490475 |
| H    | 0.019392       | 4.951657  | -2.292501 |

|    |           |           |           |
|----|-----------|-----------|-----------|
| H  | -1.207798 | 4.003085  | -3.177738 |
| C  | -2.814257 | 3.935363  | -0.886058 |
| H  | -1.966775 | 1.963641  | -0.412170 |
| H  | -1.339383 | 3.302451  | 0.591041  |
| H  | -2.622904 | 5.705956  | -2.181315 |
| H  | -1.643898 | 5.750618  | -0.700680 |
| H  | -3.406133 | 3.431537  | -1.660513 |
| H  | -3.484993 | 4.230299  | -0.074582 |
| N  | 0.823315  | 0.510624  | -0.440436 |
| C  | 1.222224  | 0.924608  | 0.698645  |
| C  | 1.454965  | -0.043981 | 1.822428  |
| C  | 0.538115  | -1.078922 | 2.036726  |
| C  | 2.583559  | 0.030520  | 2.643757  |
| C  | 0.747573  | -2.026292 | 3.032205  |
| H  | -0.362919 | -1.121109 | 1.424909  |
| C  | 2.808584  | -0.931279 | 3.622784  |
| H  | 3.306022  | 0.831776  | 2.501615  |
| C  | 1.892055  | -1.960428 | 3.821190  |
| H  | 0.014009  | -2.813670 | 3.193370  |
| H  | 3.703999  | -0.875696 | 4.237101  |
| H  | 2.066337  | -2.704134 | 4.594652  |
| C  | 1.517638  | 2.366616  | 1.035114  |
| H  | 1.109502  | 2.645099  | 2.014488  |
| H  | 2.603206  | 2.521306  | 1.091768  |
| H  | 1.123431  | 3.038245  | 0.267381  |
| Cl | 2.084384  | 2.628124  | -3.297761 |
| Cl | -1.622452 | 0.855789  | -3.305656 |
| O  | 1.310622  | -0.896702 | -2.965576 |
| C  | 0.588495  | -1.675848 | -3.944229 |
| C  | 2.661718  | -0.810280 | -3.485444 |
| C  | 1.041806  | -1.088529 | -5.264927 |
| H  | 0.886458  | -2.731801 | -3.830603 |
| H  | -0.477036 | -1.557266 | -3.731263 |
| C  | 2.499794  | -0.669135 | -4.997022 |
| H  | 3.137104  | 0.048551  | -3.002132 |
| H  | 3.190701  | -1.733480 | -3.207781 |
| H  | 0.424792  | -0.212913 | -5.496528 |
| H  | 0.944518  | -1.802726 | -6.087181 |
| H  | 2.674253  | 0.364825  | -5.308619 |
| H  | 3.216786  | -1.307538 | -5.521639 |
| C  | 2.667724  | -2.920229 | -0.536954 |
| H  | 2.637085  | -3.755086 | -1.257325 |
| H  | 3.691356  | -2.517994 | -0.586614 |
| H  | 2.569244  | -3.373865 | 0.462235  |

**RC<sub>gm</sub> MeMg(μ-Cl)(μ-Me)MgCl<sub>THF3</sub>**

| Atom | Coordinate (Å) |           |           |
|------|----------------|-----------|-----------|
|      | x              | y         | z         |
| C    | 5.049940       | 0.356943  | -1.927728 |
| C    | 6.373782       | 0.099247  | -2.250869 |
| C    | 7.223109       | -0.477157 | -1.309167 |
| C    | 6.757226       | -0.800886 | -0.036868 |
| C    | 5.436725       | -0.548936 | 0.302449  |
| C    | 4.585978       | 0.031091  | -0.647627 |
| H    | 4.374142       | 0.804437  | -2.650945 |
| H    | 6.745029       | 0.347827  | -3.240772 |
| H    | 8.259187       | -0.676246 | -1.569765 |
| H    | 7.425413       | -1.250146 | 0.691939  |
| H    | 5.053122       | -0.792926 | 1.290054  |
| C    | 3.229200       | 0.279741  | -0.289229 |
| N    | 2.127853       | 0.457446  | 0.031519  |
| Mg   | 0.244591       | 0.441985  | 1.332476  |
| C    | 1.462552       | 0.131247  | 3.062072  |
| H    | 2.090265       | 1.017903  | 3.262587  |
| H    | 0.947279       | -0.087227 | 4.012295  |
| H    | 2.177495       | -0.699038 | 2.912103  |



|    |           |           |           |
|----|-----------|-----------|-----------|
| Mg | -2.129342 | -0.722305 | -0.050094 |
| O  | -3.995905 | 0.194868  | -0.445026 |
| C  | -4.401061 | 0.501582  | -1.799071 |
| C  | -5.149278 | -0.190521 | 0.337827  |
| C  | -5.907689 | 0.636966  | -1.735182 |
| H  | -3.869378 | 1.405038  | -2.112107 |
| H  | -4.098276 | -0.330676 | -2.451336 |
| C  | -6.262280 | -0.392587 | -0.669213 |
| H  | -4.899572 | -1.097259 | 0.900527  |
| H  | -5.370486 | 0.621884  | 1.043368  |
| H  | -6.381343 | 0.447244  | -2.702109 |
| H  | -6.190239 | 1.644493  | -1.404852 |
| H  | -6.210691 | -1.406039 | -1.087336 |
| H  | -7.253131 | -0.249673 | -0.229703 |
| O  | 0.034693  | 2.529009  | 1.044924  |
| C  | -1.185759 | 3.215608  | 0.677179  |
| C  | 1.172547  | 3.366298  | 0.755669  |
| C  | -0.733512 | 4.462248  | -0.056316 |
| H  | -1.788989 | 2.538894  | 0.062084  |
| H  | -1.729674 | 3.453925  | 1.601107  |
| C  | 0.601883  | 4.760006  | 0.614195  |
| H  | 1.896997  | 3.243109  | 1.567593  |
| H  | 1.630477  | 3.025550  | -0.184349 |
| H  | -1.458747 | 5.276715  | 0.022645  |
| H  | -0.580935 | 4.237681  | -1.120281 |
| H  | 0.445796  | 5.214501  | 1.600613  |
| H  | 1.250663  | 5.417792  | 0.029405  |
| O  | -0.120143 | -1.674106 | 0.550650  |
| C  | -0.210580 | -2.585177 | 1.695194  |
| C  | 0.658945  | -2.326990 | -0.487357 |
| C  | 0.702717  | -3.758517 | 1.366763  |
| H  | 0.120226  | -2.018225 | 2.572903  |
| H  | -1.257914 | -2.881431 | 1.813907  |
| C  | 1.618223  | -3.199472 | 0.282712  |
| H  | -0.029752 | -2.920872 | -1.105320 |
| H  | 1.108397  | -1.540098 | -1.095863 |
| H  | 0.116365  | -4.593398 | 0.963873  |
| H  | 1.240064  | -4.115522 | 2.249632  |
| H  | 2.076223  | -3.973705 | -0.338951 |
| H  | 2.417108  | -2.584938 | 0.721430  |
| Cl | -2.956814 | -2.900564 | -0.522385 |
| C  | -2.022846 | 0.266374  | 1.936249  |
| H  | -2.616669 | -0.566688 | 2.358246  |
| H  | -1.442522 | 0.587728  | 2.816053  |
| H  | -2.741808 | 1.082145  | 1.768079  |
| Cl | -0.871430 | 0.560455  | -1.637053 |

**TS<sub>gm</sub> MeMg(μ-Cl)(μ-Me)MgCl<sub>THF3</sub>**

| Atom | Coordinate (Å) |           |           |
|------|----------------|-----------|-----------|
|      | x              | y         | z         |
| C    | 5.192023       | 0.854163  | -0.331402 |
| C    | 6.541653       | 0.607410  | -0.109097 |
| C    | 6.954812       | -0.635680 | 0.359972  |
| C    | 6.017518       | -1.635168 | 0.611458  |
| C    | 4.666769       | -1.392309 | 0.403724  |
| C    | 4.252996       | -0.147146 | -0.074095 |
| H    | 4.856036       | 1.817856  | -0.708714 |
| H    | 7.272227       | 1.387500  | -0.306372 |
| H    | 8.010918       | -0.827647 | 0.531075  |
| H    | 6.340856       | -2.606851 | 0.975307  |
| H    | 3.927017       | -2.164006 | 0.610318  |
| C    | 2.854612       | 0.133550  | -0.371646 |
| N    | 2.040754       | 0.394432  | -1.205147 |
| Mg   | 0.515124       | 0.463690  | 0.321241  |
| C    | 2.242857       | 0.198377  | 1.810768  |
| H    | 2.945487       | 1.022482  | 1.996972  |

|    |           |           |           |
|----|-----------|-----------|-----------|
| H  | 1.400773  | 0.358256  | 2.509470  |
| H  | 2.733694  | -0.725290 | 2.138075  |
| Mg | -2.150181 | -0.696816 | 0.147010  |
| O  | -4.033656 | 0.251326  | 0.298120  |
| C  | -4.786402 | 0.486219  | -0.917303 |
| C  | -4.940031 | -0.087613 | 1.375995  |
| C  | -6.223597 | 0.632696  | -0.466232 |
| H  | -4.364704 | 1.367625  | -1.407944 |
| H  | -4.657259 | -0.384012 | -1.578466 |
| C  | -6.277301 | -0.334614 | 0.709488  |
| H  | -4.545632 | -0.966149 | 1.899810  |
| H  | -4.974345 | 0.762746  | 2.070055  |
| H  | -6.932590 | 0.392863  | -1.263075 |
| H  | -6.417790 | 1.658736  | -0.129596 |
| H  | -6.332295 | -1.369513 | 0.348723  |
| H  | -7.117518 | -0.159432 | 1.386725  |
| O  | 0.486681  | 2.566635  | 0.434110  |
| C  | -0.725993 | 3.324216  | 0.666271  |
| C  | 1.414598  | 3.354970  | -0.347482 |
| C  | -0.626277 | 4.518948  | -0.257890 |
| H  | -1.582419 | 2.674130  | 0.456348  |
| H  | -0.743942 | 3.621598  | 1.723579  |
| C  | 0.876511  | 4.768280  | -0.286229 |
| H  | 2.413489  | 3.228129  | 0.084628  |
| H  | 1.420969  | 2.964287  | -1.374637 |
| H  | -1.207855 | 5.372126  | 0.101603  |
| H  | -0.986646 | 4.249817  | -1.259222 |
| H  | 1.200791  | 5.265326  | 0.636608  |
| H  | 1.205311  | 5.372277  | -1.136148 |
| O  | -0.025036 | -1.657557 | -0.239620 |
| C  | 0.389819  | -2.668036 | 0.733571  |
| C  | 0.230661  | -2.164367 | -1.583601 |
| C  | 0.870543  | -3.854024 | -0.082361 |
| H  | 1.189756  | -2.222659 | 1.339134  |
| H  | -0.467604 | -2.901815 | 1.372323  |
| C  | 1.303299  | -3.207526 | -1.392301 |
| H  | -0.704348 | -2.601951 | -1.960114 |
| H  | 0.517790  | -1.312001 | -2.202683 |
| H  | 0.042880  | -4.551103 | -0.261929 |
| H  | 1.672333  | -4.398620 | 0.424820  |
| H  | 1.353793  | -3.910044 | -2.228569 |
| H  | 2.284450  | -2.722903 | -1.289228 |
| Cl | -3.092964 | -2.855253 | 0.094762  |
| Cl | -1.406729 | 0.772638  | -1.627199 |
| C  | -1.167872 | 0.181791  | 1.931183  |
| H  | -2.214789 | 0.371463  | 2.230338  |
| H  | -0.820018 | -0.611053 | 2.612646  |
| H  | -0.679728 | 1.100713  | 2.288968  |

**PR<sub>gm</sub> MeMg(μ-Cl)(μ-Me)MgCl<sub>THF3</sub>**

| Atom | Coordinate (Å) |           |           |
|------|----------------|-----------|-----------|
|      | x              | y         | z         |
| C    | -4.606169      | -0.368003 | 1.106069  |
| C    | -5.816912      | -0.741204 | 1.671281  |
| C    | -6.975556      | -0.757378 | 0.895677  |
| C    | -6.904632      | -0.397560 | -0.445135 |
| C    | -5.686258      | -0.023769 | -1.007280 |
| C    | -4.515510      | -0.001040 | -0.241632 |
| H    | -3.688428      | -0.347464 | 1.691663  |
| H    | -5.862234      | -1.021601 | 2.721848  |
| H    | -7.926604      | -1.049542 | 1.335349  |
| H    | -7.801991      | -0.407139 | -1.060427 |
| H    | -5.657149      | 0.252304  | -2.058989 |
| C    | -3.168657      | 0.387558  | -0.808934 |
| N    | -2.127286      | 0.403483  | -0.095479 |
| Mg   | -0.171379      | 0.647385  | -0.256938 |

|    |           |           |           |
|----|-----------|-----------|-----------|
| C  | -3.181232 | 0.739853  | -2.291662 |
| H  | -3.863054 | 1.572601  | -2.512871 |
| H  | -2.172765 | 1.033262  | -2.600405 |
| H  | -3.504639 | -0.106160 | -2.914316 |
| Mg | 2.179872  | -0.910638 | -0.092670 |
| O  | 4.057353  | 0.013723  | -0.166834 |
| C  | 4.788894  | 0.280531  | 1.055534  |
| C  | 4.981559  | -0.325821 | -1.228844 |
| C  | 6.235976  | 0.404276  | 0.628152  |
| H  | 4.365708  | 1.180954  | 1.510408  |
| H  | 4.639333  | -0.567198 | 1.740556  |
| C  | 6.302204  | -0.579266 | -0.533529 |
| H  | 4.593216  | -1.202078 | -1.760180 |
| H  | 5.031355  | 0.524966  | -1.921366 |
| H  | 6.927035  | 0.168011  | 1.441529  |
| H  | 6.448419  | 1.423134  | 0.281222  |
| H  | 6.336361  | -1.610310 | -0.158982 |
| H  | 7.158230  | -0.422511 | -1.195114 |
| O  | -0.002589 | 2.718910  | -0.435578 |
| C  | 1.251367  | 3.437558  | -0.356401 |
| C  | -1.064111 | 3.513951  | 0.150254  |
| C  | 0.992922  | 4.558920  | 0.625957  |
| H  | 2.028812  | 2.734026  | -0.037741 |
| H  | 1.493434  | 3.815562  | -1.358872 |
| C  | -0.465413 | 4.892611  | 0.335362  |
| H  | -1.927923 | 3.471490  | -0.520202 |
| H  | -1.343591 | 3.061794  | 1.112811  |
| H  | 1.674348  | 5.402216  | 0.485629  |
| H  | 1.103264  | 4.189684  | 1.654143  |
| H  | -0.547012 | 5.476014  | -0.590238 |
| H  | -0.956438 | 5.450782  | 1.136805  |
| O  | 0.064906  | -1.632710 | 0.061834  |
| C  | -0.427504 | -2.390662 | -1.083407 |
| C  | -0.468947 | -2.214229 | 1.289162  |
| C  | -1.093999 | -3.614386 | -0.493026 |
| H  | -1.141878 | -1.749757 | -1.619016 |
| H  | 0.423371  | -2.619728 | -1.732814 |
| C  | -1.619668 | -3.079616 | 0.832580  |
| H  | 0.334720  | -2.801208 | 1.755066  |
| H  | -0.751612 | -1.390258 | 1.949184  |
| H  | -0.350021 | -4.402423 | -0.319937 |
| H  | -1.873610 | -4.012334 | -1.148148 |
| H  | -1.860151 | -3.863451 | 1.555899  |
| H  | -2.510577 | -2.457514 | 0.671896  |
| Cl | 3.011161  | -3.105776 | -0.023292 |
| Cl | 1.391050  | 0.571018  | 1.739582  |
| C  | 1.398392  | 0.253278  | -1.863972 |
| H  | 1.935915  | 1.203631  | -2.000814 |
| H  | 1.996958  | -0.482774 | -2.431313 |
| H  | 0.502875  | 0.325562  | -2.508172 |

**RC<sub>vi</sub> MgCl(μ-Cl)(μ-Me)MeMg<sub>THF</sub>3**

| Atom | Coordinate (Å) |           |           |
|------|----------------|-----------|-----------|
|      | x              | y         | z         |
| Mg   | 0.772296       | -0.574471 | -1.130299 |
| Mg   | 0.445825       | 2.166497  | 0.319176  |
| O    | -0.694060      | -2.165583 | -1.562005 |
| C    | -1.484736      | -2.778884 | -0.535322 |
| C    | -0.465793      | -3.205182 | -2.528424 |
| C    | -0.815644      | -4.122416 | -0.315890 |
| H    | -1.487314      | -2.116694 | 0.335041  |
| H    | -2.516700      | -2.890688 | -0.903610 |
| C    | -0.324164      | -4.500741 | -1.724255 |
| H    | -1.335315      | -3.238626 | -3.202283 |
| H    | 0.432292       | -2.936615 | -3.091761 |
| H    | -1.497003      | -4.860706 | 0.116434  |

|    |           |           |           |
|----|-----------|-----------|-----------|
| H  | 0.033184  | -4.000983 | 0.367168  |
| H  | -0.925629 | -5.300496 | -2.167428 |
| H  | 0.717275  | -4.834048 | -1.701647 |
| O  | 0.158096  | 3.768572  | -1.022603 |
| C  | 0.546604  | 3.638746  | -2.409899 |
| C  | -0.996494 | 4.629359  | -0.912835 |
| C  | -0.269425 | 4.678988  | -3.150654 |
| H  | 1.630238  | 3.776803  | -2.477699 |
| H  | 0.303684  | 2.614643  | -2.732295 |
| C  | -1.547069 | 4.722455  | -2.320904 |
| H  | -1.690851 | 4.189762  | -0.187541 |
| H  | -0.667562 | 5.606570  | -0.534958 |
| H  | -0.435304 | 4.407800  | -4.198331 |
| H  | 0.234544  | 5.652898  | -3.128289 |
| H  | -2.175799 | 3.848826  | -2.542104 |
| H  | -2.144779 | 5.624189  | -2.477641 |
| N  | 0.787522  | -1.130214 | 1.039399  |
| C  | 0.737776  | -1.154407 | 2.198233  |
| C  | 0.651201  | -1.168224 | 3.619934  |
| C  | 1.225713  | -2.218465 | 4.346324  |
| C  | -0.021245 | -0.122897 | 4.266278  |
| C  | 1.121877  | -2.216635 | 5.729018  |
| H  | 1.744386  | -3.017648 | 3.824474  |
| C  | -0.114259 | -0.136765 | 5.649970  |
| H  | -0.448055 | 0.687921  | 3.679004  |
| C  | 0.454170  | -1.179909 | 6.377228  |
| H  | 1.563849  | -3.025145 | 6.303890  |
| H  | -0.630161 | 0.669630  | 6.162974  |
| H  | 0.377638  | -1.184370 | 7.461329  |
| C  | -1.072258 | 0.788923  | -0.533184 |
| H  | -1.489046 | 1.652490  | -1.086785 |
| H  | -1.525299 | -0.066395 | -1.051203 |
| H  | -1.583364 | 0.782040  | 0.447695  |
| C  | 0.122611  | 2.943547  | 2.269156  |
| H  | -0.884503 | 2.731606  | 2.666198  |
| H  | 0.831903  | 2.591990  | 3.034275  |
| H  | 0.211627  | 4.042707  | 2.262810  |
| Cl | 2.506474  | 1.350753  | -0.646229 |
| O  | 0.499311  | 0.082942  | -3.146297 |
| C  | 1.568083  | 0.362815  | -4.067751 |
| C  | -0.685440 | -0.052526 | -3.938474 |
| C  | 0.932461  | 1.184177  | -5.195850 |
| H  | 2.346775  | 0.886230  | -3.504390 |
| H  | 1.975145  | -0.591179 | -4.431211 |
| C  | -0.581373 | 1.079219  | -4.941986 |
| H  | -0.677187 | -1.035564 | -4.436794 |
| H  | -1.548137 | 0.001885  | -3.269079 |
| H  | 1.206699  | 0.772173  | -6.171530 |
| H  | 1.271349  | 2.225355  | -5.178489 |
| H  | -1.155913 | 0.881391  | -5.850941 |
| H  | -0.972512 | 2.003523  | -4.496933 |
| Cl | 2.566170  | -2.131253 | -1.660158 |

**TS<sub>vi</sub> MgCl(μ-Cl)(μ-Me)MeMg<sub>THF</sub>3**

| Atom | Coordinate (Å) |           |           |
|------|----------------|-----------|-----------|
|      | x              | y         | z         |
| Mg   | 1.029702       | -0.691036 | 0.633007  |
| Mg   | -0.698910      | 1.625852  | 0.479828  |
| O    | 0.972848       | -2.285524 | -0.770245 |
| C    | -0.013362      | -2.465103 | -1.809627 |
| C    | 1.791074       | -3.471267 | -0.654901 |
| C    | 0.058028       | -3.933860 | -2.174324 |
| H    | -0.985066      | -2.137380 | -1.422062 |
| H    | 0.262047       | -1.824121 | -2.660390 |
| C    | 1.531523       | -4.239188 | -1.932746 |
| H    | 2.831338       | -3.154193 | -0.514500 |

|    |           |           |           |
|----|-----------|-----------|-----------|
| H  | 1.477342  | -4.025058 | 0.238834  |
| H  | -0.268543 | -4.122001 | -3.200609 |
| H  | -0.568776 | -4.528554 | -1.498659 |
| H  | 2.143988  | -3.839713 | -2.752504 |
| H  | 1.748912  | -5.305520 | -1.829178 |
| O  | -0.539054 | 3.635222  | -0.104430 |
| C  | 0.691554  | 4.385934  | 0.032635  |
| C  | -1.287294 | 4.114566  | -1.244787 |
| C  | 0.531366  | 5.570315  | -0.897806 |
| H  | 0.812487  | 4.647267  | 1.087481  |
| H  | 1.526949  | 3.737702  | -0.267695 |
| C  | -0.311127 | 4.974840  | -2.019370 |
| H  | -1.658535 | 3.249099  | -1.806794 |
| H  | -2.146998 | 4.690090  | -0.876306 |
| H  | 1.494001  | 5.962930  | -1.235514 |
| H  | -0.014182 | 6.380625  | -0.398862 |
| H  | 0.309721  | 4.348016  | -2.672542 |
| H  | -0.814865 | 5.723054  | -2.636840 |
| N  | -1.118051 | -0.663547 | 0.867047  |
| C  | -2.253067 | -0.335148 | 0.712693  |
| C  | -3.591337 | -0.823045 | 0.394000  |
| C  | -4.087540 | -0.661658 | -0.901086 |
| C  | -4.340372 | -1.494389 | 1.360530  |
| C  | -5.330797 | -1.184583 | -1.230558 |
| H  | -3.490538 | -0.127675 | -1.639668 |
| C  | -5.588685 | -2.006152 | 1.024304  |
| H  | -3.940151 | -1.613579 | 2.364505  |
| C  | -6.082978 | -1.853428 | -0.267604 |
| H  | -5.716153 | -1.067647 | -2.240075 |
| H  | -6.175741 | -2.529043 | 1.774738  |
| H  | -7.058769 | -2.256660 | -0.526020 |
| C  | 0.421983  | 0.876894  | -1.242732 |
| H  | 1.028790  | 1.755468  | -1.521279 |
| H  | 0.977665  | 0.025309  | -1.655608 |
| H  | -0.472245 | 0.911101  | -1.898652 |
| C  | -2.896242 | 1.779527  | 0.899798  |
| H  | -3.507530 | 1.969664  | 0.008714  |
| H  | -3.559890 | 1.421982  | 1.692397  |
| H  | -2.525729 | 2.758195  | 1.264992  |
| Cl | 0.979856  | 1.549559  | 2.196012  |
| O  | 3.043655  | -0.368064 | 0.093134  |
| C  | 3.583121  | -0.381655 | -1.243757 |
| C  | 4.118135  | -0.312007 | 1.062739  |
| C  | 5.057350  | -0.680078 | -1.066898 |
| H  | 3.035508  | -1.132604 | -1.827547 |
| H  | 3.417358  | 0.604305  | -1.699617 |
| C  | 5.354394  | 0.020078  | 0.253843  |
| H  | 3.849798  | 0.434332  | 1.817444  |
| H  | 4.187805  | -1.293977 | 1.548942  |
| H  | 5.658782  | -0.316824 | -1.904591 |
| H  | 5.220203  | -1.761631 | -0.969670 |
| H  | 5.436863  | 1.103393  | 0.100520  |
| H  | 6.270688  | -0.328195 | 0.737841  |
| Cl | 1.556400  | -2.141780 | 2.481733  |

**PR<sub>vi</sub>\_MgCl(μ-Cl)(μ-Me)MeMg<sub>THF3</sub>**

| Atom | Coordinate (Å) |           |           |
|------|----------------|-----------|-----------|
|      | x              | y         | z         |
| Mg   | 0.984367       | -0.465902 | -0.765080 |
| Mg   | -1.951862      | -1.401859 | 0.277706  |
| O    | 2.734604       | 0.074271  | 0.384001  |
| C    | 3.127944       | 1.453802  | 0.568673  |
| C    | 3.913793       | -0.740077 | 0.178463  |
| C    | 4.563387       | 1.524073  | 0.095511  |
| H    | 2.438478       | 2.090344  | 0.003344  |
| H    | 3.035605       | 1.698516  | 1.636365  |

|    |           |           |           |
|----|-----------|-----------|-----------|
| C  | 5.088505  | 0.156714  | 0.513257  |
| H  | 3.835970  | -1.630750 | 0.812751  |
| H  | 3.933168  | -1.053406 | -0.875400 |
| H  | 5.109271  | 2.360261  | 0.540963  |
| H  | 4.594391  | 1.628157  | -0.996389 |
| H  | 5.293563  | 0.138588  | 1.591086  |
| H  | 5.998323  | -0.144388 | -0.013055 |
| O  | -3.620366 | -0.220413 | -0.118799 |
| C  | -3.685175 | 0.849403  | -1.087776 |
| C  | -4.904529 | -0.406305 | 0.513790  |
| C  | -5.010995 | 1.534174  | -0.823028 |
| H  | -2.808653 | 1.492575  | -0.944767 |
| H  | -3.637055 | 0.409277  | -2.092165 |
| C  | -5.876516 | 0.372149  | -0.348496 |
| H  | -5.106449 | -1.480437 | 0.569812  |
| H  | -4.850339 | -0.002845 | 1.535793  |
| H  | -5.401651 | 2.036417  | -1.711799 |
| H  | -4.905871 | 2.281953  | -0.026311 |
| H  | -6.200900 | -0.236161 | -1.201598 |
| H  | -6.764426 | 0.686282  | 0.206373  |
| N  | -0.536252 | 0.149877  | 0.497121  |
| C  | -0.842758 | 1.234776  | 1.086153  |
| C  | -0.180714 | 2.541458  | 0.758061  |
| C  | 0.275334  | 3.418127  | 1.746810  |
| C  | -0.017913 | 2.900617  | -0.584005 |
| C  | 0.921967  | 4.600112  | 1.400407  |
| H  | 0.155319  | 3.162066  | 2.798066  |
| C  | 0.606947  | 4.092687  | -0.932800 |
| H  | -0.393331 | 2.234297  | -1.361124 |
| C  | 1.087961  | 4.941218  | 0.060862  |
| H  | 1.295564  | 5.259800  | 2.180076  |
| H  | 0.718783  | 4.357639  | -1.981360 |
| H  | 1.584901  | 5.870118  | -0.208026 |
| C  | -2.542337 | -2.920503 | 1.633763  |
| H  | -3.317349 | -3.572793 | 1.200397  |
| H  | -1.744989 | -3.596309 | 1.981881  |
| H  | -2.988612 | -2.490119 | 2.546018  |
| C  | -1.950058 | 1.350934  | 2.111888  |
| H  | -1.602945 | 1.846569  | 3.026147  |
| H  | -2.770132 | 1.968716  | 1.718831  |
| H  | -2.345388 | 0.367378  | 2.387372  |
| Cl | -1.097276 | -1.732678 | -1.982753 |
| O  | 1.351612  | -2.318205 | 0.131813  |
| C  | 1.270749  | -2.556518 | 1.558710  |
| C  | 1.567322  | -3.560488 | -0.571467 |
| C  | 1.610218  | -4.024834 | 1.732404  |
| H  | 1.958362  | -1.867364 | 2.061294  |
| H  | 0.245387  | -2.334799 | 1.885257  |
| C  | 1.134310  | -4.622920 | 0.412839  |
| H  | 0.978741  | -3.523397 | -1.493990 |
| H  | 2.636557  | -3.641058 | -0.818847 |
| H  | 1.120442  | -4.456087 | 2.610162  |
| H  | 2.694145  | -4.161699 | 1.841997  |
| H  | 0.039636  | -4.714532 | 0.405469  |
| H  | 1.567805  | -5.602159 | 0.193572  |
| Cl | 2.055860  | 0.136591  | -2.779588 |

**TS\_MgCl(μ-Cl)(μ-Me)MeMg<sub>THF3</sub>**

| Atom | Coordinate (Å) |           |           |
|------|----------------|-----------|-----------|
|      | x              | y         | z         |
| Mg   | 1.412091       | -0.880202 | -1.055446 |
| Mg   | 0.352109       | 2.367661  | 0.619096  |
| O    | -0.077766      | -2.352859 | -1.316011 |
| C    | -1.311903      | -2.532593 | -0.580030 |
| C    | 0.093732       | -3.434940 | -2.259122 |
| C    | -1.876402      | -3.859992 | -1.053280 |

|    |           |           |           |
|----|-----------|-----------|-----------|
| H  | -1.083650 | -2.504676 | 0.490789  |
| H  | -1.968761 | -1.683236 | -0.814216 |
| C  | -1.302120 | -3.978584 | -2.460255 |
| H  | 0.568489  | -3.026734 | -3.157806 |
| H  | 0.769602  | -4.181684 | -1.821958 |
| H  | -2.969008 | -3.875017 | -1.023266 |
| H  | -1.507300 | -4.680136 | -0.425724 |
| H  | -1.861909 | -3.345900 | -3.161773 |
| H  | -1.299774 | -5.001340 | -2.846075 |
| O  | 0.213932  | 3.903964  | -0.855600 |
| C  | 0.483748  | 3.611025  | -2.243114 |
| C  | -0.996090 | 4.683114  | -0.748167 |
| C  | -0.492287 | 4.463182  | -3.031516 |
| H  | 1.538618  | 3.827706  | -2.442180 |
| H  | 0.312573  | 2.534812  | -2.403977 |
| C  | -1.685883 | 4.521403  | -2.085911 |
| H  | -1.575912 | 4.303801  | 0.101851  |
| H  | -0.723263 | 5.728261  | -0.548984 |
| H  | -0.727871 | 4.032265  | -4.010259 |
| H  | -0.084339 | 5.468395  | -3.193915 |
| H  | -2.241284 | 3.573667  | -2.111698 |
| H  | -2.381771 | 5.336379  | -2.301994 |
| N  | 1.187441  | -1.244813 | 1.080275  |
| C  | 1.136616  | -1.145103 | 2.234134  |
| C  | 1.065044  | -0.930144 | 3.638145  |
| C  | 1.041770  | -2.001877 | 4.538245  |
| C  | 1.014977  | 0.397178  | 4.083502  |
| C  | 0.966602  | -1.732583 | 5.896339  |
| H  | 1.083751  | -3.023140 | 4.170909  |
| C  | 0.937756  | 0.646637  | 5.445171  |
| H  | 1.032930  | 1.213620  | 3.361721  |
| C  | 0.914238  | -0.414440 | 6.347081  |
| H  | 0.949016  | -2.552947 | 6.607866  |
| H  | 0.897772  | 1.673483  | 5.798916  |
| H  | 0.855165  | -0.214166 | 7.413674  |
| C  | -1.227716 | 1.039109  | -0.000171 |
| H  | -2.228710 | 1.500417  | 0.039795  |
| H  | -1.109963 | 0.719552  | -1.053412 |
| H  | -1.310751 | 0.116010  | 0.596662  |
| C  | 0.707092  | 3.449667  | 2.438627  |
| H  | 1.706728  | 3.321295  | 2.885791  |
| H  | 0.621734  | 4.530110  | 2.229552  |
| H  | -0.010861 | 3.251030  | 3.252124  |
| Cl | 2.402094  | 1.305376  | -0.454308 |
| O  | 0.714847  | -0.104958 | -2.889011 |
| C  | 1.633711  | 0.448567  | -3.857014 |
| C  | -0.511141 | -0.373855 | -3.583282 |
| C  | 0.761920  | 1.128001  | -4.920024 |
| H  | 2.297113  | 1.126214  | -3.310360 |
| H  | 2.232309  | -0.372576 | -4.273337 |
| C  | -0.678653 | 0.830945  | -4.482103 |
| H  | -0.404227 | -1.301834 | -4.168454 |
| H  | -1.299834 | -0.504796 | -2.836379 |
| H  | 0.965973  | 0.702090  | -5.907203 |
| H  | 0.959007  | 2.202858  | -4.984268 |
| H  | -1.350143 | 0.636183  | -5.322447 |
| H  | -1.098605 | 1.662538  | -3.900535 |
| Cl | 3.256347  | -2.159107 | -1.723516 |

**RC<sub>vi</sub> MgCl(μ-Cl)Me<sub>2</sub>Mg<sub>THF</sub>3**

| Atom | Coordinate (Å) |           |           |
|------|----------------|-----------|-----------|
|      | x              | y         | z         |
| Mg   | 1.463918       | -0.971806 | -1.072114 |
| Mg   | 0.240424       | 2.364009  | 0.596523  |
| O    | -0.067015      | -2.396075 | -1.310439 |
| C    | -1.316478      | -2.494512 | -0.587564 |

|    |           |           |           |
|----|-----------|-----------|-----------|
| C  | 0.057168  | -3.497716 | -2.238599 |
| C  | -1.914581 | -3.826055 | -1.001061 |
| H  | -1.102502 | -2.414286 | 0.483322  |
| H  | -1.945292 | -1.640430 | -0.877779 |
| C  | -1.355907 | -4.009060 | -2.407195 |
| H  | 0.523002  | -3.116974 | -3.153792 |
| H  | 0.720802  | -4.254315 | -1.799754 |
| H  | -3.006919 | -3.815942 | -0.961505 |
| H  | -1.556405 | -4.628445 | -0.344641 |
| H  | -1.905652 | -3.385601 | -3.124641 |
| H  | -1.384834 | -5.043862 | -2.758195 |
| O  | 0.188324  | 3.972812  | -0.833400 |
| C  | 0.522418  | 3.724351  | -2.214859 |
| C  | -1.035779 | 4.732875  | -0.759975 |
| C  | -0.456008 | 4.550659  | -3.028342 |
| H  | 1.574575  | 3.986008  | -2.370429 |
| H  | 0.400965  | 2.646902  | -2.403501 |
| C  | -1.679688 | 4.567397  | -2.119700 |
| H  | -1.635782 | 4.337472  | 0.068233  |
| H  | -0.786751 | 5.781398  | -0.546891 |
| H  | -0.646090 | 4.115816  | -4.015289 |
| H  | -0.075485 | 5.568997  | -3.174534 |
| H  | -2.208231 | 3.605400  | -2.168379 |
| H  | -2.389650 | 5.366131  | -2.350357 |
| N  | 1.219942  | -1.322081 | 1.077875  |
| C  | 1.177574  | -1.209831 | 2.231088  |
| C  | 1.119339  | -0.985949 | 3.634579  |
| C  | 1.170061  | -2.049777 | 4.542810  |
| C  | 1.011010  | 0.340623  | 4.071226  |
| C  | 1.110416  | -1.773230 | 5.900232  |
| H  | 1.256766  | -3.070591 | 4.182134  |
| C  | 0.951029  | 0.597523  | 5.432374  |
| H  | 0.972159  | 1.150602  | 3.343176  |
| C  | 1.001058  | -0.455672 | 6.342424  |
| H  | 1.150062  | -2.587388 | 6.617969  |
| H  | 0.867008  | 1.624191  | 5.778935  |
| H  | 0.955295  | -0.249585 | 7.408572  |
| C  | -1.396665 | 1.164599  | -0.123895 |
| H  | -2.370366 | 1.681270  | -0.154265 |
| H  | -1.203513 | 0.841769  | -1.164651 |
| H  | -1.571160 | 0.239793  | 0.450894  |
| C  | 0.605905  | 3.384455  | 2.450579  |
| H  | 1.614438  | 3.257747  | 2.877905  |
| H  | 0.502233  | 4.469201  | 2.273759  |
| H  | -0.096792 | 3.153893  | 3.268864  |
| Cl | 2.313791  | 1.275307  | -0.433539 |
| O  | 0.801541  | -0.236598 | -2.934524 |
| C  | 1.676275  | 0.521896  | -3.806956 |
| C  | -0.473141 | -0.415447 | -3.573681 |
| C  | 0.803174  | 0.997212  | -4.965300 |
| H  | 2.089281  | 1.341106  | -3.206899 |
| H  | 2.499983  | -0.127636 | -4.124113 |
| C  | -0.620936 | 0.808346  | -4.446800 |
| H  | -0.456260 | -1.339217 | -4.173512 |
| H  | -1.232462 | -0.506538 | -2.790103 |
| H  | 0.965538  | 0.372464  | -5.850782 |
| H  | 1.023625  | 2.032240  | -5.244572 |
| H  | -1.354741 | 0.669307  | -5.245173 |
| H  | -0.941435 | 1.662099  | -3.833581 |
| Cl | 3.326369  | -2.238966 | -1.686033 |

**RC<sub>gm</sub> MeMg(μ-Cl)<sub>2</sub>MeMgZn**

| Atom | Coordinate (Å) |           |           |
|------|----------------|-----------|-----------|
|      | x              | y         | z         |
| C    | 3.191151       | -2.812445 | -0.169851 |
| C    | 2.752697       | -1.528661 | 0.177660  |

|    |           |           |           |
|----|-----------|-----------|-----------|
| C  | 3.659021  | -0.481281 | 0.398722  |
| C  | 5.015886  | -0.731913 | 0.264758  |
| C  | 5.458717  | -2.006715 | -0.080723 |
| C  | 4.552105  | -3.042869 | -0.295523 |
| H  | 2.469926  | -3.606875 | -0.337525 |
| H  | 3.286418  | 0.504999  | 0.671497  |
| H  | 5.730296  | 0.068927  | 0.430361  |
| H  | 6.523883  | -2.195383 | -0.184205 |
| H  | 4.908609  | -4.032749 | -0.564069 |
| C  | 1.365701  | -1.246306 | 0.298232  |
| N  | 0.242217  | -0.970518 | 0.398085  |
| Mg | -1.339687 | 0.498665  | 0.231788  |
| C  | -1.430176 | 2.626875  | 0.023949  |
| H  | -1.721712 | 2.828583  | -1.017145 |
| H  | -0.875055 | 3.507774  | 0.377516  |
| Cl | -3.007372 | -0.389841 | 1.825526  |
| Cl | -2.565820 | -0.512473 | -1.656710 |
| Mg | -4.302914 | -1.279420 | -0.065830 |
| C  | -6.120027 | -2.308908 | -0.218935 |
| H  | -6.074190 | -3.296741 | 0.259939  |
| H  | -6.944929 | -1.765815 | 0.262052  |
| H  | -6.418027 | -2.477668 | -1.262579 |
| H  | -2.362495 | 2.686456  | 0.614122  |
| Zn | 0.901931  | 2.304194  | -0.173712 |
| C  | 1.613243  | 2.361370  | 1.652344  |
| H  | 2.690691  | 2.565687  | 1.714226  |
| H  | 1.114994  | 3.135349  | 2.252057  |
| H  | 1.447555  | 1.411841  | 2.183969  |
| C  | 1.058798  | 2.030331  | -2.101156 |
| H  | 0.509111  | 2.791377  | -2.671423 |
| H  | 2.090961  | 2.032378  | -2.473149 |
| H  | 0.623306  | 1.061164  | -2.389124 |

#### TS<sub>gm</sub>\_MeMg( $\mu$ -Cl)<sub>2</sub>MeMgZn

| Atom | Coordinate (Å) |           |           |
|------|----------------|-----------|-----------|
|      | x              | y         | z         |
| C    | 2.855228       | 2.396456  | -0.353617 |
| C    | 2.745776       | 1.047573  | 0.002444  |
| C    | 3.893399       | 0.276892  | 0.185828  |
| C    | 5.144684       | 0.851479  | 0.012600  |
| C    | 5.254624       | 2.198414  | -0.324420 |
| C    | 4.110139       | 2.970096  | -0.504562 |
| H    | 1.951011       | 2.981524  | -0.501573 |
| H    | 3.792586       | -0.772519 | 0.453311  |
| H    | 6.038193       | 0.247770  | 0.146137  |
| H    | 6.236701       | 2.648057  | -0.446771 |
| H    | 4.194532       | 4.021525  | -0.766024 |
| C    | 1.395167       | 0.502006  | 0.094217  |
| N    | 0.289052       | 0.713024  | -0.324347 |
| Mg   | -1.422305      | -0.424353 | -0.118094 |
| C    | -0.879226      | -2.458740 | 0.610924  |
| H    | -1.430255      | -2.148602 | 1.515222  |
| H    | -0.345902      | -3.356785 | 0.953105  |
| Cl   | -3.261680      | -0.396004 | -1.701822 |
| Cl   | -2.788700      | 0.681021  | 1.594944  |
| Mg   | -4.628374      | 0.888900  | -0.031411 |
| C    | -6.264037      | 2.189621  | -0.160645 |
| H    | -5.971340      | 3.231994  | 0.024400  |
| H    | -6.746693      | 2.167791  | -1.146855 |
| H    | -7.040664      | 1.946892  | 0.577930  |
| H    | -1.607482      | -2.868331 | -0.106532 |
| Zn   | 1.041215       | -1.787154 | 0.096934  |
| C    | 2.132835       | -2.468552 | -1.387342 |
| H    | 3.054322       | -2.949084 | -1.032950 |
| H    | 1.601577       | -3.208244 | -1.998863 |
| H    | 2.444315       | -1.659309 | -2.061435 |

|   |          |           |          |
|---|----------|-----------|----------|
| C | 1.510064 | -0.786256 | 1.899469 |
| H | 1.720628 | -1.794883 | 2.302462 |
| H | 2.337647 | -0.164505 | 2.244771 |
| H | 0.583693 | -0.433634 | 2.367665 |

#### PR<sub>gm</sub>\_MeMg( $\mu$ -Cl)<sub>2</sub>MeMgZn

| Atom | Coordinate (Å) |           |           |
|------|----------------|-----------|-----------|
|      | x              | y         | z         |
| C    | 0.419281       | 3.627764  | 0.572498  |
| C    | 0.175538       | 2.420399  | -0.089201 |
| C    | 1.226812       | 1.818705  | -0.789582 |
| C    | 2.492802       | 2.388724  | -0.805590 |
| C    | 2.730959       | 3.275415  | -0.114614 |
| C    | 1.690535       | 4.193255  | 0.571097  |
| H    | -0.383057      | 4.124964  | 1.113088  |
| H    | 1.035777       | 0.906366  | -1.351650 |
| H    | 3.292170       | 1.915281  | -1.372415 |
| H    | 3.721878       | 4.022633  | -0.121497 |
| H    | 1.867158       | 5.122722  | 1.106850  |
| C    | -1.166549      | 1.760890  | -0.054494 |
| N    | -1.280338      | 0.496208  | -0.145883 |
| Mg   | -0.296837      | -1.254638 | -0.047486 |
| C    | -2.089975      | -2.616193 | 0.030654  |
| H    | -1.304969      | -3.212920 | -0.471711 |
| H    | -2.990057      | -2.982602 | -0.479233 |
| Cl   | 1.211166       | -1.809098 | 1.802796  |
| Cl   | 1.439456       | -1.829841 | -1.675060 |
| Mg   | 3.089029       | -1.877901 | 0.191078  |
| C    | 5.178596       | -1.854987 | 0.223641  |
| H    | 5.608918       | -1.426800 | -0.691537 |
| H    | 5.578079       | -1.272089 | 1.064511  |
| H    | 5.587263       | -2.870261 | 0.320613  |
| H    | -2.144934      | -3.014434 | 1.053199  |
| Zn   | -2.895133      | -0.661661 | -0.036368 |
| C    | -4.808549      | -0.271501 | -0.030884 |
| H    | -5.084913      | 0.368587  | -0.879372 |
| H    | -5.423121      | -1.177820 | -0.101901 |
| H    | -5.123131      | 0.259493  | 0.876697  |
| C    | -2.352591      | 2.677736  | 0.101791  |
| H    | -3.278954      | 2.125792  | -0.080384 |
| H    | -2.395670      | 3.084494  | 1.120315  |
| H    | -2.294092      | 3.534161  | -0.579866 |

#### RC<sub>vi</sub>\_MeMg( $\mu$ -Cl)<sub>2</sub>MeMgZn

| Atom | Coordinate (Å) |           |           |
|------|----------------|-----------|-----------|
|      | x              | y         | z         |
| C    | -2.075814      | -1.863261 | -1.069184 |
| C    | -1.574519      | -2.053129 | 0.226235  |
| C    | -2.429287      | -2.115458 | 1.334128  |
| C    | -3.796115      | -1.998487 | 1.133902  |
| C    | -4.300794      | -1.818894 | -0.152699 |
| C    | -3.445311      | -1.747234 | -1.249563 |
| H    | -1.390481      | -1.806134 | -1.910762 |
| H    | -2.017291      | -2.254260 | 2.329896  |
| H    | -4.471239      | -2.048566 | 1.982927  |
| H    | -5.373517      | -1.729393 | -0.301240 |
| H    | -3.846614      | -1.596877 | -2.247356 |
| C    | -0.166537      | -2.156234 | 0.395656  |
| N    | 0.989420       | -2.209633 | 0.490912  |
| Mg   | 2.936710       | -1.472329 | -0.200173 |
| C    | 4.433386       | -2.781256 | -0.864152 |
| H    | 4.036628       | -3.552308 | -1.540214 |
| H    | 5.233071       | -2.268933 | -1.417328 |
| H    | 4.923263       | -3.316117 | -0.037843 |
| Cl   | 3.177821       | 0.436240  | 1.436838  |

|    |           |          |           |
|----|-----------|----------|-----------|
| Cl | 1.618775  | 0.138597 | -1.647848 |
| Mg | 1.347827  | 1.572688 | 0.316912  |
| C  | -0.336603 | 1.161844 | 1.773256  |
| H  | -1.333443 | 1.318626 | 2.206975  |
| H  | 0.347880  | 1.583144 | 2.528453  |
| H  | -0.193054 | 0.072739 | 1.804596  |
| Zn | -1.051216 | 2.162301 | 0.045691  |
| C  | -2.829073 | 1.838909 | -0.707165 |
| H  | -3.479616 | 2.722785 | -0.695183 |
| H  | -2.761651 | 1.511893 | -1.753182 |
| H  | -3.354384 | 1.042729 | -0.161763 |
| C  | 0.443022  | 3.344761 | -0.844123 |
| H  | 0.274892  | 3.203173 | -1.919155 |
| H  | -0.002313 | 4.313401 | -0.575650 |
| H  | 1.527727  | 3.556610 | -0.771738 |

### TS<sub>vi</sub> MeMg(μ-Cl)<sub>2</sub>MeMgZn

| Atom | Coordinate (Å) |           |           |
|------|----------------|-----------|-----------|
|      | x              | y         | z         |
| C    | 1.953865       | -2.201519 | 0.037107  |
| C    | 1.920950       | -0.891644 | 0.537153  |
| C    | 3.103798       | -0.160934 | 0.646009  |
| C    | 4.309578       | -0.734376 | 0.265133  |
| C    | 4.340830       | -2.036324 | -0.226316 |
| C    | 3.162066       | -2.769487 | -0.339285 |
| H    | 1.022135       | -2.755913 | -0.051765 |
| H    | 3.075962       | 0.854142  | 1.032458  |
| H    | 5.228739       | -0.161722 | 0.352774  |
| H    | 5.287054       | -2.480831 | -0.523818 |
| H    | 3.183944       | -3.785515 | -0.723723 |
| C    | 0.593256       | -0.370998 | 0.854887  |
| N    | -0.550189      | -0.721774 | 0.848803  |
| Mg   | -2.557431      | -1.380769 | 0.777738  |
| C    | -3.715441      | -2.554918 | 2.079407  |
| H    | -4.078315      | -1.979749 | 2.942890  |
| H    | -4.602798      | -2.983268 | 1.593496  |
| H    | -3.143181      | -3.400619 | 2.486378  |
| Cl   | -1.859236      | -1.976236 | -1.709390 |
| Cl   | -3.041687      | 0.993538  | -0.215798 |
| Mg   | -1.085723      | 0.276392  | -1.375743 |
| C    | 0.886018       | 1.144141  | -1.821151 |
| H    | 1.865643       | 1.596670  | -1.605035 |
| H    | 0.542748       | 1.689187  | -2.713417 |
| H    | 1.179847       | 0.129140  | -2.140441 |
| Zn   | 0.493097       | 2.062509  | 0.047981  |
| C    | 0.897173       | 1.428553  | 2.009880  |
| H    | 1.551155       | 2.301286  | 2.174958  |
| H    | -0.106900      | 1.653699  | 2.397129  |
| H    | 1.308404       | 0.645110  | 2.656011  |
| C    | -0.065447      | 3.946666  | 0.039510  |
| H    | -0.941756      | 4.101212  | 0.682671  |
| H    | 0.728146       | 4.599115  | 0.427150  |
| H    | -0.328749      | 4.318622  | -0.958503 |

### PR<sub>vi</sub> MeMg(μ-Cl)<sub>2</sub>MeMgZn

| Atom | Coordinate (Å) |           |           |
|------|----------------|-----------|-----------|
|      | x              | y         | z         |
| C    | 2.105618       | -0.277834 | -1.279464 |
| C    | 1.783737       | -1.160097 | -0.240247 |
| C    | 2.810703       | -1.683018 | 0.549517  |
| C    | 4.124715       | -1.285590 | 0.341437  |
| C    | 4.434769       | -0.390608 | -0.679851 |
| C    | 3.426419       | 0.101969  | -1.500179 |
| H    | 1.317489       | 0.074424  | -1.945158 |
| H    | 2.571968       | -2.367837 | 1.361219  |

|    |           |           |           |
|----|-----------|-----------|-----------|
| H  | 4.913023  | -1.673248 | 0.981523  |
| H  | 5.465644  | -0.087190 | -0.842346 |
| H  | 3.665894  | 0.774674  | -2.320038 |
| C  | 0.345836  | -1.459883 | 0.040043  |
| N  | -0.480163 | -0.495554 | 0.212391  |
| Mg | -2.596669 | -0.980281 | 0.419619  |
| C  | -3.569308 | -2.664190 | 1.146941  |
| H  | -3.107992 | -3.050643 | 2.066891  |
| H  | -4.620147 | -2.459007 | 1.388651  |
| H  | -3.570528 | -3.490171 | 0.422008  |
| Cl | -2.499011 | -0.213098 | -2.168528 |
| Cl | -2.914624 | 1.455128  | 0.935645  |
| Mg | -1.335340 | 1.224361  | -0.782591 |
| C  | 0.313154  | 2.660672  | -0.805924 |
| H  | 1.389264  | 2.863685  | -0.882483 |
| H  | -0.125204 | 3.563028  | -0.360674 |
| H  | 0.019808  | 2.664034  | -1.876121 |
| Zn | 0.784792  | 1.180252  | 0.622856  |
| C  | -0.028980 | -2.913300 | 0.049614  |
| H  | 0.735095  | -3.530836 | 0.534196  |
| H  | -0.994872 | -3.093480 | 0.534227  |
| H  | -0.095860 | -3.260483 | -0.990845 |
| C  | 1.816595  | 1.275926  | 2.258622  |
| H  | 1.694230  | 0.358880  | 2.847107  |
| H  | 2.888403  | 1.389776  | 2.054572  |
| H  | 1.507523  | 2.117934  | 2.886455  |

### RC<sub>gm</sub> MeMg(μ-Cl)(μ-Me)MgClZn

| Atom | Coordinate (Å) |           |           |
|------|----------------|-----------|-----------|
|      | x              | y         | z         |
| C    | 2.667749       | 2.929459  | 0.069779  |
| C    | 2.548628       | 1.582716  | -0.295779 |
| C    | 3.678068       | 0.776294  | -0.498526 |
| C    | 4.935778       | 1.334201  | -0.329998 |
| C    | 5.061297       | 2.673315  | 0.033622  |
| C    | 3.934190       | 3.468401  | 0.231845  |
| H    | 1.777412       | 3.531681  | 0.225162  |
| H    | 3.550106       | -0.267207 | -0.780826 |
| H    | 5.821024       | 0.723760  | -0.480640 |
| H    | 6.050554       | 3.103092  | 0.165935  |
| H    | 4.044188       | 4.510395  | 0.516749  |
| C    | 1.269308       | 0.985788  | -0.439731 |
| N    | 0.252042       | 0.437995  | -0.545763 |
| Mg   | -1.362113      | -0.920418 | -0.176079 |
| C    | -1.042644      | -3.034981 | -0.332517 |
| H    | -2.056506      | -3.198512 | 0.078900  |
| H    | -0.473869      | -3.860272 | 0.121559  |
| Mg   | -3.805845      | 0.738626  | -0.107993 |
| H    | -1.106129      | -3.272698 | -1.404465 |
| Zn   | 1.057178       | -2.308331 | 0.199297  |
| C    | 2.003601       | -2.534523 | -1.505969 |
| H    | 3.097396       | -2.585491 | -1.414494 |
| H    | 1.695285       | -3.452225 | -2.026543 |
| H    | 1.788137       | -1.707760 | -2.199877 |
| C    | 1.180368       | -1.782523 | 2.088537  |
| H    | 0.326278       | -2.125090 | 2.688974  |
| H    | 2.079787       | -2.194837 | 2.565182  |
| H    | 1.238233       | -0.692706 | 2.222361  |
| Cl   | -5.348637      | 2.436959  | -0.342840 |
| Cl   | -2.309480      | 0.281284  | 1.744995  |
| C    | -2.932781      | -0.485952 | -1.739798 |
| H    | -3.594029      | 0.131648  | -2.369337 |
| H    | -2.004344      | -0.455929 | -2.337097 |
| H    | -3.331034      | -1.505663 | -1.846678 |

### TS<sub>gm</sub> MeMg(μ-Cl)(μ-Me)MgClZn

| Atom | Coordinate (Å) |           |           |
|------|----------------|-----------|-----------|
|      | x              | y         | z         |
| C    | 2.851112       | 2.460984  | -0.132559 |
| C    | 2.769850       | 1.083835  | 0.102480  |
| C    | 3.932138       | 0.315340  | 0.162836  |
| C    | 5.169367       | 0.919132  | -0.009569 |
| C    | 5.251748       | 2.292368  | -0.226253 |
| C    | 4.093068       | 3.061870  | -0.285543 |
| H    | 1.936210       | 3.045751  | -0.185280 |
| H    | 3.852586       | -0.755237 | 0.336129  |
| H    | 6.073115       | 0.317208  | 0.030340  |
| H    | 6.223293       | 2.764212  | -0.349038 |
| H    | 4.156503       | 4.133647  | -0.453350 |
| C    | 1.431810       | 0.510992  | 0.211359  |
| N    | 0.292206       | 0.751194  | -0.085813 |
| Mg   | -1.344988      | -0.500693 | 0.046323  |
| C    | -0.693455      | -2.591858 | 0.401858  |
| H    | -1.250028      | -2.426285 | 1.341461  |
| H    | -0.104029      | -3.487132 | 0.647322  |
| Cl   | -2.854958      | 0.242829  | 1.811846  |
| Mg   | -4.112027      | 0.432857  | -0.276379 |
| H    | -1.406090      | -2.956680 | -0.352450 |
| Zn   | 1.154335       | -1.760978 | -0.123634 |
| C    | 2.155470       | -2.117194 | -1.775017 |
| H    | 3.131814       | -2.575449 | -1.569321 |
| H    | 1.623586       | -2.791232 | -2.457808 |
| H    | 2.357206       | -1.190915 | -2.329438 |
| C    | 1.680714       | -1.035515 | 1.786325  |
| H    | 2.068369       | -2.047751 | 2.006784  |
| H    | 2.413906       | -0.353161 | 2.220644  |
| H    | 0.732087       | -0.912618 | 2.322691  |
| Cl   | -5.993983      | 1.734127  | -0.560914 |
| C    | -2.725540      | -0.552314 | -1.720760 |
| H    | -1.732473      | -0.438812 | -2.189712 |
| H    | -2.988600      | -1.612844 | -1.843064 |
| H    | -3.344451      | -0.021762 | -2.462303 |

| <b>PR<sub>gm</sub> MeMg(μ-Cl)(μ-Me)MgClZn</b> |                |           |           |
|-----------------------------------------------|----------------|-----------|-----------|
| Atom                                          | Coordinate (Å) |           |           |
|                                               | x              | y         | z         |
| C                                             | -0.851146      | 3.374503  | -0.493498 |
| C                                             | -0.407460      | 2.221686  | 0.162225  |
| C                                             | -1.326660      | 1.498173  | 0.931553  |
| C                                             | -2.653388      | 1.897657  | 1.023636  |
| C                                             | -3.088829      | 3.030934  | 0.339176  |
| C                                             | -2.183493      | 3.768267  | -0.416051 |
| H                                             | -0.157636      | 3.965549  | -1.087282 |
| H                                             | -0.981479      | 0.627933  | 1.487825  |
| H                                             | -3.347516      | 1.329793  | 1.639734  |
| H                                             | -4.128055      | 3.342952  | 0.405221  |
| H                                             | -2.513996      | 4.657629  | -0.946969 |
| C                                             | 1.008842       | 1.752185  | 0.055102  |
| N                                             | 1.307893       | 0.521054  | 0.187164  |
| Mg                                            | 0.594694       | -1.363643 | 0.018111  |
| C                                             | 2.572049       | -2.395251 | -0.394022 |
| H                                             | 1.814354       | -3.197313 | -0.475852 |
| H                                             | 3.297549       | -2.820791 | 0.312023  |
| Mg                                            | -2.292895      | -1.863890 | -0.448021 |
| H                                             | 3.055135       | -2.421847 | -1.382333 |
| Zn                                            | 3.062782       | -0.354881 | -0.011966 |
| C                                             | 4.946685       | 0.150685  | -0.004898 |
| H                                             | 5.229712       | 0.674673  | 0.916831  |
| H                                             | 5.608995       | -0.719439 | -0.096567 |
| H                                             | 5.185562       | 0.825932  | -0.836703 |
| C                                             | 2.040361       | 2.815787  | -0.222845 |
| H                                             | 1.939032       | 3.198173  | -1.246500 |

|    |           |           |           |
|----|-----------|-----------|-----------|
| H  | 1.928667  | 3.674337  | 0.449528  |
| H  | 3.045080  | 2.396112  | -0.117756 |
| Cl | -4.583822 | -1.621163 | -0.608930 |
| Cl | -1.032629 | -2.234607 | 1.637651  |
| C  | -0.652709 | -1.457721 | -1.874233 |
| H  | -0.484585 | -0.397553 | -2.119383 |
| H  | 0.261968  | -1.997922 | -2.173436 |
| H  | -1.358929 | -1.802116 | -2.645772 |

| <b>RC<sub>vi</sub> MgCl(μ-Cl)(μ-Me)MeMgZn</b> |                |           |           |
|-----------------------------------------------|----------------|-----------|-----------|
| Atom                                          | Coordinate (Å) |           |           |
|                                               | x              | y         | z         |
| C                                             | -2.384337      | -1.080315 | -0.120363 |
| C                                             | -1.652872      | -2.250112 | 0.133651  |
| C                                             | -2.280587      | -3.499522 | 0.208381  |
| C                                             | -3.653167      | -3.572298 | 0.029088  |
| C                                             | -4.386145      | -2.414831 | -0.224381 |
| C                                             | -3.755491      | -1.174811 | -0.299610 |
| H                                             | -1.882356      | -0.114550 | -0.167179 |
| H                                             | -1.692634      | -4.391809 | 0.402345  |
| H                                             | -4.153197      | -4.534569 | 0.084853  |
| H                                             | -5.461555      | -2.480468 | -0.365809 |
| H                                             | -4.330543      | -0.274885 | -0.500814 |
| C                                             | -0.245514      | -2.143372 | 0.297836  |
| N                                             | 0.900498       | -2.003510 | 0.419298  |
| Mg                                            | 2.728750       | -0.916380 | 0.013911  |
| Cl                                            | 1.646503       | 0.417067  | -1.768577 |
| Mg                                            | 1.277735       | 1.650995  | 0.347795  |
| C                                             | -0.492497      | 1.209775  | 1.769133  |
| H                                             | -1.518894      | 1.157321  | 2.155401  |
| H                                             | 0.092622       | 1.656608  | 2.589628  |
| H                                             | -0.181789      | 0.155574  | 1.714811  |
| Zn                                            | -1.073443      | 2.466316  | 0.191330  |
| C                                             | -2.873227      | 2.493391  | -0.590489 |
| H                                             | -3.232907      | 3.499415  | -0.838870 |
| H                                             | -2.907107      | 1.911595  | -1.522454 |
| H                                             | -3.614516      | 2.048476  | 0.088625  |
| C                                             | 0.544608       | 3.590774  | -0.572172 |
| H                                             | 0.492163       | 3.537898  | -1.666559 |
| H                                             | 0.085505       | 4.546021  | -0.280755 |
| H                                             | 1.613480       | 3.775459  | -0.345659 |
| C                                             | 2.875980       | 0.683831  | 1.567902  |
| H                                             | 3.964950       | 0.634131  | 1.403807  |
| H                                             | 2.773773       | 1.652874  | 2.084708  |
| H                                             | 2.647534       | -0.033757 | 2.373706  |
| Cl                                            | 4.526847       | -2.333578 | -0.197253 |

| <b>TS<sub>vi</sub> MgCl(μ-Cl)(μ-Me)MeMgZn</b> |                |           |           |
|-----------------------------------------------|----------------|-----------|-----------|
| Atom                                          | Coordinate (Å) |           |           |
|                                               | x              | y         | z         |
| C                                             | -1.780264      | -2.395372 | 0.048761  |
| C                                             | -1.929318      | -1.108921 | -0.488705 |
| C                                             | -3.202084      | -0.549829 | -0.595564 |
| C                                             | -4.314047      | -1.269738 | -0.176682 |
| C                                             | -4.162976      | -2.548611 | 0.351064  |
| C                                             | -2.893594      | -3.110599 | 0.463879  |
| H                                             | -0.781518      | -2.818507 | 0.132190  |
| H                                             | -3.315477      | 0.449905  | -1.006021 |
| H                                             | -5.303651      | -0.829489 | -0.263782 |
| H                                             | -5.035782      | -3.108566 | 0.676932  |
| H                                             | -2.770816      | -4.108344 | 0.876701  |
| C                                             | -0.685619      | -0.433724 | -0.860737 |
| N                                             | 0.487605       | -0.654109 | -0.895282 |
| Mg                                            | 2.412974       | -1.028841 | -0.257359 |
| Cl                                            | 2.883397       | 1.424387  | -0.003074 |

|    |           |           |           |
|----|-----------|-----------|-----------|
| Mg | 1.087659  | 0.764468  | 1.521363  |
| C  | -1.080659 | 1.099054  | 1.789401  |
| H  | -2.122161 | 1.385005  | 1.576101  |
| H  | -0.868329 | 1.642153  | 2.724755  |
| H  | -1.174705 | 0.028665  | 2.031426  |
| Zn | -0.789790 | 2.028479  | -0.083379 |
| C  | -1.246614 | 1.290314  | -2.002981 |
| H  | -2.006023 | 2.081306  | -2.133474 |
| H  | -0.300958 | 1.625861  | -2.451662 |
| H  | -1.604769 | 0.465772  | -2.629172 |
| C  | -0.249919 | 3.915648  | -0.196205 |
| H  | 0.444662  | 4.070138  | -1.032347 |
| H  | -1.108692 | 4.577007  | -0.373069 |
| H  | 0.250845  | 4.283113  | 0.708569  |
| C  | 1.752408  | -1.270370 | 1.966140  |
| H  | 2.607560  | -1.194507 | 2.654188  |
| H  | 0.860775  | -1.387968 | 2.605947  |
| H  | 1.829568  | -2.285903 | 1.542053  |
| Cl | 4.024159  | -2.582380 | -0.810413 |

**PR<sub>vi</sub> MgCl(μ-Cl)(μ-Me)MeMgZn**

| Atom | Coordinate (Å) |           |           |
|------|----------------|-----------|-----------|
|      | x              | y         | z         |
| C    | 2.330444       | 0.410502  | 1.281518  |
| C    | 1.813198       | 1.263814  | 0.300699  |
| C    | 2.691263       | 1.876902  | -0.597600 |
| C    | 4.049970       | 1.589138  | -0.555095 |
| C    | 4.552995       | 0.713583  | 0.404797  |
| C    | 3.693681       | 0.135488  | 1.333458  |
| H    | 1.656884       | -0.023306 | 2.018955  |
| H    | 2.303869       | 2.546951  | -1.362837 |
| H    | 4.720782       | 2.046400  | -1.277992 |
| H    | 5.616550       | 0.491451  | 0.434497  |
| H    | 4.083219       | -0.525804 | 2.103572  |
| C    | 0.331870       | 1.442510  | 0.187710  |
| N    | -0.424560      | 0.414535  | 0.082741  |
| Mg   | -2.532652      | 0.462922  | -0.027681 |
| Cl   | -2.410852      | -1.872538 | -0.942887 |
| Mg   | -1.113003      | -1.519498 | 1.163262  |
| C    | 0.814979       | -2.642763 | 0.933477  |
| H    | 1.884478       | -2.804214 | 0.747353  |
| H    | 0.342530       | -3.607799 | 0.702987  |
| H    | 0.796995       | -2.517894 | 2.031914  |
| Zn   | 0.829732       | -1.178075 | -0.537761 |
| C    | -0.139544      | 2.869071  | 0.188161  |
| H    | 0.253280       | 3.404771  | -0.685356 |
| H    | -1.231770      | 2.950157  | 0.172454  |
| H    | 0.246792       | 3.393944  | 1.070201  |
| C    | 1.554539       | -1.011145 | -2.340720 |
| H    | 1.237169       | -0.061218 | -2.790222 |
| H    | 2.651933       | -1.017734 | -2.351775 |
| H    | 1.213173       | -1.818849 | -2.998828 |
| Cl   | -4.023346      | 2.178542  | -0.423465 |
| C    | -2.659791      | -0.311221 | 2.163505  |
| H    | -3.740022      | -0.318919 | 1.940057  |
| H    | -2.607845      | -0.936522 | 3.068900  |
| H    | -2.420466      | 0.700667  | 2.531313  |

**RC<sub>gm</sub> MeMg(μ-Cl)<sub>2</sub>MeMgZn<sub>THF</sub>3**

| Atom | Coordinate (Å) |          |           |
|------|----------------|----------|-----------|
|      | x              | y        | z         |
| C    | -4.571604      | 2.544933 | 0.429547  |
| C    | -3.992436      | 1.345913 | -0.001759 |
| C    | -4.697761      | 0.442199 | -0.809601 |
| C    | -5.996189      | 0.752902 | -1.183571 |

|    |           |           |           |
|----|-----------|-----------|-----------|
| C  | -6.579301 | 1.943845  | -0.756951 |
| C  | -5.871566 | 2.836257  | 0.045804  |
| H  | -4.004594 | 3.230203  | 1.053070  |
| H  | -4.210128 | -0.476818 | -1.134378 |
| H  | -6.554689 | 0.064680  | -1.811102 |
| H  | -7.597338 | 2.180591  | -1.054645 |
| H  | -6.335091 | 3.762698  | 0.371654  |
| C  | -2.660729 | 1.005013  | 0.363700  |
| N  | -1.582249 | 0.668198  | 0.632525  |
| Mg | 0.123341  | -0.640053 | 0.166546  |
| C  | 0.302544  | -2.288189 | -1.311417 |
| H  | 0.571956  | -1.950479 | -2.321603 |
| H  | -0.059421 | -3.327620 | -1.393265 |
| Cl | 1.863396  | 0.052497  | 1.871968  |
| Cl | 1.024335  | 1.166144  | -1.385933 |
| Mg | 3.122017  | 1.171004  | 0.015944  |
| C  | 5.103646  | 1.757280  | -0.482348 |
| H  | 5.517856  | 2.540476  | 0.172434  |
| H  | 5.825554  | 0.923898  | -0.463892 |
| H  | 5.155596  | 2.167466  | -1.505295 |
| O  | 3.367120  | -0.901698 | -0.720173 |
| C  | 4.165751  | -1.828672 | 0.041412  |
| C  | 3.621253  | -1.080348 | -2.128027 |
| H  | 4.700501  | -1.277581 | 0.824194  |
| H  | 3.486543  | -2.546362 | 0.524884  |
| C  | 5.083116  | -2.501676 | -0.963179 |
| C  | 4.245986  | -2.454160 | -2.235673 |
| H  | 2.667010  | -0.966881 | -2.652067 |
| H  | 4.312804  | -0.292008 | -2.464281 |
| H  | 5.366080  | -3.512418 | -0.656173 |
| H  | 6.000572  | -1.913351 | -1.093482 |
| H  | 4.830524  | -2.580047 | -3.151172 |
| H  | 3.464660  | -3.225840 | -2.213428 |
| H  | 1.278083  | -2.429046 | -0.806223 |
| Zn | -1.912592 | -1.973083 | -1.454093 |
| C  | -2.956194 | -2.940162 | -0.084494 |
| H  | -3.938042 | -3.278255 | -0.445886 |
| H  | -2.438242 | -3.833545 | 0.294159  |
| H  | -3.154007 | -2.309379 | 0.795819  |
| C  | -2.173738 | -0.881064 | -3.074119 |
| H  | -1.453528 | -1.141774 | -3.863187 |
| H  | -3.175524 | -0.969344 | -3.517711 |
| H  | -2.020644 | 0.190714  | -2.875965 |
| O  | -0.555238 | -1.901350 | 1.720656  |
| C  | 0.087842  | -3.173371 | 1.937208  |
| C  | -1.271045 | -1.498814 | 2.903365  |
| C  | -0.044650 | -3.435638 | 3.423711  |
| H  | -0.434342 | -3.925988 | 1.330356  |
| H  | 1.128353  | -3.102022 | 1.598094  |
| C  | -1.370765 | -2.756307 | 3.739960  |
| H  | -0.695434 | -0.709983 | 3.410521  |
| H  | -2.238546 | -1.090879 | 2.592198  |
| H  | 0.772262  | -2.944379 | 3.968368  |
| H  | -0.026266 | -4.502439 | 3.662152  |
| H  | -1.514060 | -2.542217 | 4.802429  |
| H  | -2.209381 | -3.373733 | 3.392146  |
| O  | 2.469230  | 3.107549  | 0.766832  |
| C  | 1.210516  | 3.370210  | 1.422852  |
| C  | 2.844703  | 4.244909  | -0.039148 |
| C  | 0.976858  | 4.857899  | 1.254459  |
| H  | 0.429178  | 2.780520  | 0.921737  |
| H  | 1.292758  | 3.036673  | 2.461639  |
| C  | 1.603140  | 5.109535  | -0.111289 |
| H  | 3.676921  | 4.763082  | 0.457276  |
| H  | 3.195743  | 3.883538  | -1.012256 |
| H  | 1.508676  | 5.424609  | 2.029355  |



|   |           |          |           |
|---|-----------|----------|-----------|
| H | -0.083939 | 5.119388 | 1.306310  |
| H | 1.836791  | 6.160119 | -0.305084 |
| H | 0.937419  | 4.749577 | -0.906245 |

**TS<sub>qm</sub>\_MeMg(μ-Cl)<sub>2</sub>MeMgZn<sub>THF3</sub>**

| Atom | Coordinate (Å) |           |           |
|------|----------------|-----------|-----------|
|      | x              | y         | z         |
| C    | 4.004877       | -1.072236 | 2.220130  |
| C    | 3.833410       | -1.377246 | 0.864370  |
| C    | 4.917737       | -1.811494 | 0.103336  |
| C    | 6.166331       | -1.944763 | 0.695795  |
| C    | 6.333576       | -1.657407 | 2.047921  |
| C    | 5.252183       | -1.222231 | 2.809735  |
| H    | 3.149302       | -0.724864 | 2.796007  |
| H    | 4.769609       | -2.029188 | -0.951500 |
| H    | 7.012442       | -2.276792 | 0.100238  |
| H    | 7.311236       | -1.771133 | 2.509420  |
| H    | 5.381889       | -0.996211 | 3.864845  |
| C    | 2.508011       | -1.131801 | 0.311373  |
| N    | 1.503528       | -0.524546 | 0.538967  |
| Mg   | -0.206729      | 0.139523  | -0.505401 |
| C    | 0.281126       | -0.700813 | -2.644967 |
| H    | -0.538350      | -1.361058 | -2.318709 |
| H    | 0.659530       | -1.227641 | -3.536024 |
| Cl   | -2.408274      | 1.148894  | -1.298104 |
| Cl   | -1.623825      | -1.906119 | 0.265480  |
| Mg   | -3.221607      | -0.087522 | 0.693907  |
| C    | -4.227189      | 0.483218  | 2.466486  |
| H    | -3.858907      | 1.375258  | 2.996801  |
| H    | -5.297604      | 0.666282  | 2.272950  |
| H    | -4.197904      | -0.333168 | 3.207368  |
| O    | -4.797051      | -0.995141 | -0.378312 |
| C    | -5.877362      | -0.170113 | -0.870323 |
| C    | -5.320968      | -2.243042 | 0.128020  |
| H    | -5.747445      | 0.846242  | -0.479557 |
| H    | -5.809026      | -0.137072 | -1.965210 |
| C    | -7.145440      | -0.848871 | -0.392607 |
| C    | -6.737371      | -2.317289 | -0.401774 |
| H    | -4.662005      | -3.047196 | -0.212123 |
| H    | -5.303207      | -2.208110 | 1.228636  |
| H    | -8.002884      | -0.626448 | -1.033319 |
| H    | -7.386474      | -0.528280 | 0.629194  |
| H    | -7.378088      | -2.953526 | 0.214573  |
| H    | -6.742642      | -2.710996 | -1.425565 |
| H    | -0.164440      | 0.215966  | -3.055907 |
| Zn   | 2.202016       | -0.753361 | -1.916863 |
| C    | 3.655892       | 0.505782  | -2.374757 |
| H    | 4.462539       | 0.027178  | -2.947391 |
| H    | 3.301817       | 1.352219  | -2.980722 |
| H    | 4.132134       | 0.932709  | -1.479440 |
| C    | 2.273750       | -2.758691 | -1.275129 |
| H    | 2.546547       | -3.080927 | -2.296453 |
| H    | 2.891144       | -3.359466 | -0.603103 |
| H    | 1.221480       | -3.014539 | -1.103157 |
| O    | 0.810240       | 2.001553  | -0.781685 |
| C    | 0.603892       | 2.837708  | -1.945577 |
| C    | 1.889445       | 2.539061  | 0.021134  |
| C    | 1.295042       | 4.140011  | -1.609257 |
| H    | 1.066085       | 2.342676  | -2.812008 |
| H    | -0.475499      | 2.919000  | -2.108179 |
| C    | 2.497071       | 3.648371  | -0.812966 |
| H    | 1.456821       | 2.927097  | 0.956128  |
| H    | 2.582845       | 1.727516  | 0.265438  |
| H    | 0.645848       | 4.765484  | -0.981906 |
| H    | 1.563305       | 4.710663  | -2.502301 |
| H    | 2.961906       | 4.420985  | -0.194694 |

|   |           |           |           |
|---|-----------|-----------|-----------|
| H | 3.258667  | 3.236751  | -1.487600 |
| O | -1.084509 | 0.903082  | 1.437335  |
| C | -1.258413 | 2.334443  | 1.662956  |
| C | -0.619206 | 0.304666  | 2.677615  |
| C | -0.634023 | 2.629496  | 3.024156  |
| H | -0.767894 | 2.851194  | 0.831024  |
| H | -2.330726 | 2.557856  | 1.633395  |
| C | 0.212724  | 1.391948  | 3.309259  |
| H | -1.499204 | 0.049775  | 3.285963  |
| H | -0.071790 | -0.604057 | 2.417253  |
| H | -1.416576 | 2.729199  | 3.785772  |
| H | -0.056210 | 3.558685  | 3.017258  |
| H | 0.385181  | 1.225151  | 4.376073  |
| H | 1.187056  | 1.446054  | 2.803914  |

**PR<sub>qm</sub>\_MeMg(μ-Cl)<sub>2</sub>MeMgZn<sub>THF3</sub>**

| Atom | Coordinate (Å) |           |           |
|------|----------------|-----------|-----------|
|      | x              | y         | z         |
| C    | -3.273791      | 3.154973  | -0.001278 |
| C    | -2.508339      | 2.476451  | -0.953038 |
| C    | -1.424550      | 3.130538  | -1.543494 |
| C    | -1.103340      | 4.433660  | -1.179126 |
| C    | -1.853558      | 5.092853  | -0.207757 |
| C    | -2.937637      | 4.449744  | 0.382959  |
| H    | -4.123612      | 2.654856  | 0.463506  |
| H    | -0.823150      | 2.598219  | -2.278101 |
| H    | -0.259137      | 4.933404  | -1.648764 |
| H    | -1.596031      | 6.107934  | 0.085006  |
| H    | -3.525921      | 4.958980  | 1.143080  |
| C    | -2.820511      | 1.055456  | -1.317325 |
| N    | -1.986464      | 0.119820  | -1.130171 |
| Mg   | -0.201185      | -0.528886 | -0.317061 |
| C    | -0.287306      | -2.308825 | -2.158568 |
| H    | 0.565249       | -1.614988 | -2.249128 |
| H    | -0.483059      | -2.575607 | -3.208456 |
| Cl   | 1.850900       | -1.876772 | 0.530015  |
| Cl   | 1.549294       | 1.028582  | -1.397333 |
| Mg   | 3.009493       | 0.271640  | 0.409737  |
| C    | 3.689962       | 1.420043  | 2.050262  |
| H    | 3.098701       | 1.325111  | 2.974591  |
| H    | 4.722904       | 1.146734  | 2.323566  |
| H    | 3.716139       | 2.496867  | 1.820230  |
| O    | 4.681377       | -0.312240 | -0.686334 |
| C    | 5.569219       | -1.330937 | -0.167133 |
| C    | 5.449016       | 0.712315  | -1.366037 |
| H    | 5.238866       | -1.599669 | 0.842754  |
| H    | 5.487805       | -2.216295 | -0.810406 |
| C    | 6.947102       | -0.707308 | -0.222076 |
| C    | 6.849486       | 0.145812  | -1.481347 |
| H    | 4.961919       | 0.920485  | -2.323278 |
| H    | 5.429324       | 1.622554  | -0.747940 |
| H    | 7.742179       | -1.456491 | -0.260489 |
| H    | 7.111898       | -0.072461 | 0.658275  |
| H    | 7.608087       | 0.930736  | -1.538224 |
| H    | 6.936594       | -0.482309 | -2.376160 |
| H    | 0.108611       | -3.217155 | -1.686573 |
| Zn   | -2.183703      | -1.835390 | -1.626110 |
| C    | -3.892379      | -2.812250 | -1.578276 |
| H    | -4.396538      | -2.826448 | -2.554873 |
| H    | -3.780274      | -3.862194 | -1.273174 |
| H    | -4.606175      | -2.353435 | -0.877495 |
| C    | -4.198790      | 0.862615  | -1.904105 |
| H    | -4.366328      | -0.185707 | -2.169082 |
| H    | -4.972965      | 1.174176  | -1.189833 |
| H    | -4.332741      | 1.490623  | -2.794064 |
| O    | -1.569701      | -1.858180 | 0.829186  |

|   |           |           |          |
|---|-----------|-----------|----------|
| C | -1.307774 | -3.230309 | 1.232181 |
| C | -2.763247 | -1.372147 | 1.495107 |
| C | -2.215834 | -3.472138 | 2.419110 |
| H | -1.558956 | -3.884657 | 0.386098 |
| H | -0.238324 | -3.316589 | 1.446590 |
| C | -3.421173 | -2.606187 | 2.073773 |
| H | -2.458217 | -0.664450 | 2.280902 |
| H | -3.366364 | -0.839264 | 0.752998 |
| H | -1.743091 | -3.122039 | 3.346326 |
| H | -2.458405 | -4.531101 | 2.541820 |
| H | -4.054863 | -2.372697 | 2.933562 |
| H | -4.036965 | -3.096369 | 1.308791 |
| O | 0.135437  | 0.576584  | 1.482336 |
| C | 0.194679  | 0.016032  | 2.815863 |
| C | -0.075398 | 1.998870  | 1.613204 |
| C | -0.431578 | 1.060811  | 3.744451 |
| H | -0.347132 | -0.935112 | 2.788849 |
| H | 1.242574  | -0.192464 | 3.062423 |
| C | -1.017405 | 2.099801  | 2.787558 |
| H | 0.894077  | 2.478550  | 1.819028 |
| H | -0.470586 | 2.367398  | 0.663698 |
| H | 0.341775  | 1.519206  | 4.371550 |
| H | -1.181319 | 0.622760  | 4.410313 |
| H | -1.060053 | 3.106800  | 3.212427 |
| H | -2.031188 | 1.822676  | 2.465489 |

**RC<sub>vi</sub> MeMg(μ-Cl)<sub>2</sub>MeMgZn<sub>THF</sub>3**

| Atom | Coordinate (Å) |           |           |
|------|----------------|-----------|-----------|
|      | x              | y         | z         |
| C    | 3.111304       | -2.839817 | -0.345329 |
| C    | 2.547956       | -1.896205 | -1.214374 |
| C    | 2.568391       | -2.078484 | -2.602865 |
| C    | 3.154161       | -3.226149 | -3.117592 |
| C    | 3.711365       | -4.172239 | -2.259401 |
| C    | 3.693508       | -3.980120 | -0.879174 |
| H    | 3.088344       | -2.661719 | 0.728037  |
| H    | 2.118440       | -1.327648 | -3.250408 |
| H    | 3.177518       | -3.383652 | -4.191970 |
| H    | 4.167417       | -5.068740 | -2.670923 |
| H    | 4.134795       | -4.720399 | -0.218417 |
| C    | 1.901996       | -0.756629 | -0.659480 |
| N    | 1.340331       | 0.143348  | -0.187295 |
| Mg   | -1.021573      | 0.229735  | -1.599793 |
| Mg   | 0.265870       | 1.671451  | 1.205736  |
| C    | 2.302243       | 2.383436  | 1.765173  |
| H    | 1.825648       | 3.323736  | 1.428763  |
| H    | 3.065643       | 2.158550  | 1.008828  |
| O    | -0.750593      | 2.994318  | 2.460335  |
| C    | -0.181399      | 3.597789  | 3.643940  |
| C    | -2.188627      | 3.157449  | 2.459834  |
| H    | 0.551922       | 2.901267  | 4.063670  |
| H    | 0.330626       | 4.523174  | 3.346825  |
| C    | -1.365185      | 3.868717  | 4.547984  |
| C    | -2.462133      | 4.184312  | 3.538018  |
| H    | -2.491131      | 3.455309  | 1.450991  |
| H    | -2.643633      | 2.184488  | 2.692386  |
| H    | -1.171087      | 4.678784  | 5.256077  |
| H    | -1.619072      | 2.964616  | 5.117411  |
| H    | -3.472515      | 4.095601  | 3.946066  |
| H    | -2.337799      | 5.200485  | 3.143502  |
| H    | 2.842387       | 2.706199  | 2.670743  |
| Zn   | 2.060804       | 0.491092  | 2.805392  |
| C    | 3.773846       | -0.441452 | 2.509893  |
| H    | 4.064796       | -0.388654 | 1.449582  |
| H    | 4.597637       | 0.027272  | 3.067813  |
| H    | 3.781001       | -1.502931 | 2.794081  |

|    |           |           |           |
|----|-----------|-----------|-----------|
| C  | 0.389200  | 0.198452  | 3.850139  |
| H  | 0.096362  | -0.860068 | 3.845768  |
| H  | 0.613849  | 0.454743  | 4.897398  |
| H  | -0.515194 | 0.765691  | 3.591651  |
| O  | -0.865315 | -1.957216 | -1.443385 |
| C  | -0.810330 | -2.830773 | -0.291417 |
| C  | -0.948996 | -2.748000 | -2.649775 |
| C  | -0.489013 | -4.198012 | -0.854961 |
| H  | -0.065956 | -2.433846 | 0.408250  |
| H  | -1.787902 | -2.814114 | 0.210488  |
| C  | -1.236998 | -4.159223 | -2.181483 |
| H  | -1.726666 | -2.319342 | -3.293468 |
| H  | 0.012096  | -2.681429 | -3.178720 |
| H  | -0.807752 | -5.006241 | -0.191389 |
| H  | 0.592406  | -4.297971 | -1.027096 |
| H  | -2.314532 | -4.296365 | -2.015677 |
| H  | -0.903335 | -4.911493 | -2.901278 |
| Cl | -1.631742 | 0.098359  | 0.897799  |
| O  | -3.076732 | 0.209960  | -2.070666 |
| C  | -3.930789 | -0.917862 | -1.786953 |
| C  | -3.538979 | 0.813873  | -3.290314 |
| C  | -4.597562 | -1.293105 | -3.116777 |
| H  | -3.291446 | -1.708056 | -1.377401 |
| H  | -4.656979 | -0.626503 | -1.019112 |
| C  | -3.929009 | -0.372316 | -4.142265 |
| H  | -4.400413 | 1.459213  | -3.065301 |
| H  | -2.721661 | 1.423331  | -3.686850 |
| H  | -5.673938 | -1.096410 | -3.071822 |
| H  | -4.467059 | -2.353379 | -3.355942 |
| H  | -4.589537 | -0.104569 | -4.971291 |
| H  | -3.023956 | -0.832001 | -4.561202 |
| Cl | -0.469406 | 2.762123  | -0.871217 |
| C  | -0.011105 | 0.412986  | -3.468282 |
| H  | 1.050369  | 0.669329  | -3.301108 |
| H  | -0.012697 | -0.461446 | -4.140884 |
| H  | -0.401422 | 1.251924  | -4.069572 |

**TS<sub>vi</sub> MeMg(μ-Cl)<sub>2</sub>MeMgZn<sub>THF</sub>3**

| Atom | Coordinate (Å) |           |           |
|------|----------------|-----------|-----------|
|      | x              | y         | z         |
| C    | 2.654624       | -3.006291 | 0.653171  |
| C    | 2.261635       | -1.978598 | -0.207192 |
| C    | 2.226357       | -2.184139 | -1.589435 |
| C    | 2.596065       | -3.421027 | -2.105738 |
| C    | 2.979528       | -4.449846 | -1.250354 |
| C    | 3.001005       | -4.243775 | 0.128302  |
| H    | 2.672437       | -2.827425 | 1.726553  |
| H    | 1.892932       | -1.380195 | -2.243384 |
| H    | 2.579266       | -3.580388 | -3.181016 |
| H    | 3.264552       | -5.416403 | -1.657859 |
| H    | 3.296998       | -5.048426 | 0.795817  |
| C    | 1.768735       | -0.707686 | 0.300048  |
| N    | 0.861758       | 0.066778  | 0.213941  |
| Mg   | -0.996966      | -0.004211 | -1.164410 |
| Mg   | -0.096206      | 1.701946  | 1.429369  |
| C    | 1.930339       | 2.234651  | 2.353903  |
| H    | 1.279652       | 3.002080  | 2.796978  |
| H    | 2.299742       | 2.623985  | 1.391566  |
| O    | -1.101209      | 3.011009  | 2.722746  |
| C    | -1.153272      | 2.676888  | 4.131099  |
| C    | -2.336861      | 3.658710  | 2.325035  |
| H    | -0.798909      | 1.647327  | 4.259447  |
| H    | -0.475548      | 3.354271  | 4.667999  |
| C    | -2.599015      | 2.879334  | 4.531895  |
| C    | -3.013013      | 4.032932  | 3.626457  |
| H    | -2.078739      | 4.504610  | 1.682283  |

|    |           |           |           |
|----|-----------|-----------|-----------|
| H  | -2.929164 | 2.935774  | 1.747794  |
| H  | -2.707088 | 3.094366  | 5.598276  |
| H  | -3.184929 | 1.982018  | 4.296531  |
| H  | -4.095865 | 4.132286  | 3.514080  |
| H  | -2.617640 | 4.982255  | 4.008833  |
| H  | 2.806898  | 2.256492  | 3.015942  |
| Zn | 1.978723  | 0.163242  | 2.508108  |
| C  | 3.710372  | -0.073959 | 1.349017  |
| H  | 3.871663  | 0.482761  | 0.418988  |
| H  | 4.206068  | 0.516594  | 2.140341  |
| H  | 4.222343  | -1.035838 | 1.288806  |
| C  | 1.209335  | -1.174002 | 3.727067  |
| H  | 0.525515  | -1.854706 | 3.199768  |
| H  | 1.985452  | -1.803247 | 4.183889  |
| H  | 0.630235  | -0.734168 | 4.549438  |
| O  | -1.141845 | -2.123358 | -0.874065 |
| C  | -1.091746 | -2.918861 | 0.332842  |
| C  | -1.256210 | -2.984279 | -2.025634 |
| C  | -0.954305 | -4.351882 | -0.141448 |
| H  | -0.251352 | -2.569326 | 0.943433  |
| H  | -2.020130 | -2.748302 | 0.894025  |
| C  | -1.704289 | -4.317010 | -1.467479 |
| H  | -1.958593 | -2.524127 | -2.730960 |
| H  | -0.271696 | -3.055918 | -2.511104 |
| H  | -1.363204 | -5.066377 | 0.577999  |
| H  | 0.103576  | -4.598505 | -0.309207 |
| H  | -2.789674 | -4.315593 | -1.295948 |
| H  | -1.463228 | -5.150262 | -2.133095 |
| Cl | -1.965655 | 0.138799  | 1.484471  |
| O  | -3.078681 | 0.136486  | -1.589369 |
| C  | -4.062103 | -0.847410 | -1.217044 |
| C  | -3.546284 | 0.769497  | -2.788842 |
| C  | -4.808172 | -1.212596 | -2.508867 |
| H  | -3.522182 | -1.685332 | -0.763809 |
| H  | -4.726542 | -0.412557 | -0.460052 |
| C  | -4.106841 | -0.383579 | -3.590799 |
| H  | -4.323045 | 1.503956  | -2.527700 |
| H  | -2.696865 | 1.284648  | -3.244843 |
| H  | -5.863644 | -0.930977 | -2.431703 |
| H  | -4.770431 | -2.286792 | -2.716142 |
| H  | -4.780297 | -0.064001 | -4.390691 |
| H  | -3.277051 | -0.942751 | -4.043814 |
| Cl | -0.731857 | 2.732724  | -0.640587 |
| C  | -0.106643 | 0.080267  | -3.104107 |
| H  | 0.916896  | 0.491079  | -3.051437 |
| H  | -0.015272 | -0.886466 | -3.628604 |
| H  | -0.637326 | 0.747439  | -3.804828 |

**PR<sub>vi</sub> MeMg(μ-Cl)<sub>2</sub>MeMgZn<sub>THF3</sub>**

| Atom | Coordinate (Å) |           |           |
|------|----------------|-----------|-----------|
|      | x              | y         | z         |
| C    | 2.362859       | -2.513665 | -0.876552 |
| C    | 2.880151       | -1.241689 | -1.145463 |
| C    | 3.812985       | -1.099011 | -2.177357 |
| C    | 4.191952       | -2.195798 | -2.942394 |
| C    | 3.673222       | -3.457673 | -2.664783 |
| C    | 2.763016       | -3.616009 | -1.624016 |
| H    | 1.658674       | -2.631145 | -0.052988 |
| H    | 4.224297       | -0.118207 | -2.407736 |
| H    | 4.899839       | -2.065885 | -3.757362 |
| H    | 3.983685       | -4.316650 | -3.254501 |
| H    | 2.369842       | -4.603329 | -1.387558 |
| C    | 2.423736       | -0.083000 | -0.312199 |
| N    | 1.182973       | 0.101144  | -0.048166 |
| Mg   | -0.153408      | -0.722518 | -1.469470 |
| Mg   | 0.181031       | 1.780148  | 0.838222  |

|    |           |           |           |
|----|-----------|-----------|-----------|
| C  | 1.635899  | 1.751335  | 2.880853  |
| H  | 1.169210  | 1.868961  | 3.867731  |
| H  | 1.507042  | 2.735320  | 2.397921  |
| O  | -1.076302 | 3.221648  | 1.765771  |
| C  | -1.381772 | 3.232977  | 3.182597  |
| C  | -2.243535 | 3.628922  | 1.014200  |
| H  | -1.072224 | 2.273628  | 3.608179  |
| H  | -0.800641 | 4.042981  | 3.642390  |
| C  | -2.875288 | 3.472707  | 3.272285  |
| C  | -3.141322 | 4.305904  | 2.025402  |
| H  | -1.905178 | 4.263398  | 0.190771  |
| H  | -2.721173 | 2.725988  | 0.596025  |
| H  | -3.159948 | 3.969236  | 4.203896  |
| H  | -3.412365 | 2.517391  | 3.211296  |
| H  | -4.189385 | 4.307039  | 1.713809  |
| H  | -2.826011 | 5.345324  | 2.179740  |
| H  | 2.720285  | 1.708092  | 3.053007  |
| Zn | 1.274107  | -0.141210 | 2.302901  |
| C  | 3.552394  | 0.767620  | 0.214202  |
| H  | 4.224234  | 1.066744  | -0.597931 |
| H  | 3.193185  | 1.669646  | 0.714149  |
| H  | 4.163474  | 0.187578  | 0.921158  |
| C  | 1.844204  | -1.969663 | 2.661885  |
| H  | 1.138064  | -2.722068 | 2.284956  |
| H  | 2.814867  | -2.180848 | 2.192776  |
| H  | 1.957451  | -2.163807 | 3.735654  |
| O  | -0.909015 | -2.579366 | -0.881030 |
| C  | -1.253094 | -3.095434 | 0.421808  |
| C  | -0.982549 | -3.638824 | -1.867073 |
| C  | -0.968702 | -4.575532 | 0.318253  |
| H  | -0.665064 | -2.546393 | 1.163586  |
| H  | -2.319420 | -2.898864 | 0.611564  |
| C  | -1.438192 | -4.871082 | -1.102755 |
| H  | -1.671125 | -3.328066 | -2.661859 |
| H  | 0.019519  | -3.758809 | -2.299273 |
| H  | -1.493590 | -5.158271 | 1.079830  |
| H  | 0.108678  | -4.764076 | 0.423359  |
| H  | -2.531674 | -4.955662 | -1.125669 |
| H  | -1.019083 | -5.790233 | -1.520934 |
| Cl | -1.321339 | 0.070103  | 1.911761  |
| O  | -2.023457 | 0.252369  | -1.421558 |
| C  | -3.238436 | -0.443398 | -1.060500 |
| C  | -2.307046 | 1.255139  | -2.427477 |
| C  | -4.354805 | 0.346301  | -1.713509 |
| H  | -3.179015 | -1.467566 | -1.460762 |
| H  | -3.283141 | -0.489100 | 0.033152  |
| C  | -3.668755 | 0.877861  | -2.966467 |
| H  | -2.306155 | 2.240634  | -1.940625 |
| H  | -1.498351 | 1.227727  | -3.165429 |
| H  | -4.665501 | 1.178792  | -1.068823 |
| H  | -5.233046 | -0.271566 | -1.919599 |
| H  | -4.186051 | 1.723616  | -3.427367 |
| H  | -3.571613 | 0.080631  | -3.716112 |
| Cl | 0.439393  | 3.179728  | -1.069315 |
| C  | 0.235867  | -0.848452 | -3.548506 |
| H  | 0.737850  | 0.046350  | -3.952800 |
| H  | 0.882434  | -1.698465 | -3.819282 |
| H  | -0.687647 | -0.965993 | -4.143898 |

**RC<sub>qm</sub> MeMg(μ-Cl)(μ-Me)MgCl Zn<sub>THF3</sub>**

| Atom | Coordinate (Å) |           |           |
|------|----------------|-----------|-----------|
|      | x              | y         | z         |
| C    | -3.830675      | -2.809575 | -1.347627 |
| C    | -3.751084      | -1.733861 | -0.454331 |
| C    | -4.872636      | -1.293414 | 0.261294  |
| C    | -6.081518      | -1.946517 | 0.075857  |

|    |           |           |           |
|----|-----------|-----------|-----------|
| C  | -6.167759 | -3.018038 | -0.810211 |
| C  | -5.048625 | -3.448442 | -1.520105 |
| H  | -2.944786 | -3.129847 | -1.890106 |
| H  | -4.774996 | -0.454108 | 0.947560  |
| H  | -6.959814 | -1.619862 | 0.624550  |
| H  | -7.118999 | -3.524761 | -0.949303 |
| H  | -5.126703 | -4.285085 | -2.207899 |
| C  | -2.513049 | -1.061725 | -0.269411 |
| N  | -1.515564 | -0.489919 | -0.115503 |
| Mg | 0.233611  | 0.704875  | 0.503711  |
| C  | -0.047604 | 1.301096  | 2.636282  |
| H  | 0.807795  | 0.679017  | 2.944218  |
| H  | -0.594002 | 1.466764  | 3.580578  |
| Mg | 2.853562  | -0.287150 | -0.341888 |
| O  | 4.475882  | -0.511355 | 0.973055  |
| C  | 5.671022  | 0.283403  | 0.784385  |
| C  | 4.833548  | -1.831843 | 1.446497  |
| H  | 5.626260  | 0.749525  | -0.206936 |
| H  | 5.680644  | 1.066469  | 1.553752  |
| C  | 6.824322  | -0.687941 | 0.935577  |
| C  | 6.260871  | -1.695868 | 1.929690  |
| H  | 4.110260  | -2.118460 | 2.214565  |
| H  | 4.758623  | -2.536756 | 0.604707  |
| H  | 7.739328  | -0.196456 | 1.276700  |
| H  | 7.031050  | -1.177461 | -0.024697 |
| H  | 6.790468  | -2.652279 | 1.929899  |
| H  | 6.284116  | -1.288050 | 2.947907  |
| H  | 0.344995  | 2.304059  | 2.405392  |
| Zn | -2.016753 | 0.447537  | 2.385997  |
| C  | -3.438616 | 1.712786  | 1.803847  |
| H  | -4.419131 | 1.483386  | 2.248249  |
| H  | -3.231972 | 2.759072  | 2.076702  |
| H  | -3.594460 | 1.712629  | 0.713154  |
| C  | -2.030664 | -1.357229 | 3.211267  |
| H  | -1.337560 | -1.436679 | 4.061832  |
| H  | -3.016219 | -1.647807 | 3.605249  |
| H  | -1.738848 | -2.147341 | 2.503995  |
| O  | -0.812266 | 2.393145  | -0.405277 |
| C  | -0.815254 | 3.680449  | 0.256362  |
| C  | -1.835889 | 2.381494  | -1.427996 |
| C  | -1.486710 | 4.612822  | -0.724452 |
| H  | -1.383745 | 3.588917  | 1.192548  |
| H  | 0.220964  | 3.945342  | 0.490249  |
| C  | -2.565164 | 3.706144  | -1.301548 |
| H  | -1.339803 | 2.279397  | -2.404895 |
| H  | -2.482797 | 1.513018  | -1.269372 |
| H  | -0.778424 | 4.920293  | -1.504708 |
| H  | -1.881455 | 5.510739  | -0.241800 |
| H  | -2.965216 | 4.049099  | -2.259346 |
| H  | -3.396284 | 3.611149  | -0.591046 |
| O  | 1.029299  | 0.060735  | -1.702419 |
| C  | 1.240315  | 1.148514  | -2.653163 |
| C  | 0.530610  | -1.087918 | -2.436512 |
| C  | 0.606249  | 0.691829  | -3.964199 |
| H  | 0.773382  | 2.041379  | -2.222682 |
| H  | 2.317430  | 1.323032  | -2.753195 |
| C  | -0.284282 | -0.476475 | -3.548640 |
| H  | 1.393486  | -1.649551 | -2.822299 |
| H  | -0.021732 | -1.710499 | -1.729465 |
| H  | 1.383407  | 0.338654  | -4.652052 |
| H  | 0.060817  | 1.499746  | -4.461276 |
| H  | -0.478593 | -1.178868 | -4.363772 |
| H  | -1.249399 | -0.125304 | -3.157784 |
| Cl | 4.134829  | -0.864702 | -2.243037 |
| Cl | 1.350901  | -1.707756 | 0.874563  |
| C  | 2.335765  | 1.729005  | 0.429544  |

|   |          |          |           |
|---|----------|----------|-----------|
| H | 3.249447 | 1.989098 | -0.139983 |
| H | 1.705711 | 2.599842 | 0.197099  |
| H | 2.632033 | 1.836853 | 1.483456  |

| <b>TS<sub>qm</sub> MeMg(<math>\mu</math>-Cl)(<math>\mu</math>-Me)MgCl Zn<sub>THF3</sub></b> |                |           |           |
|---------------------------------------------------------------------------------------------|----------------|-----------|-----------|
| Atom                                                                                        | Coordinate (Å) |           |           |
|                                                                                             | x              | y         | z         |
| C                                                                                           | -3.816924      | -0.518987 | -2.494948 |
| C                                                                                           | -3.695455      | -1.129673 | -1.240865 |
| C                                                                                           | -4.784239      | -1.795650 | -0.679821 |
| C                                                                                           | -5.986824      | -1.855276 | -1.370707 |
| C                                                                                           | -6.102714      | -1.263418 | -2.625866 |
| C                                                                                           | -5.017178      | -0.596215 | -3.187490 |
| H                                                                                           | -2.960322      | 0.006612  | -2.912609 |
| H                                                                                           | -4.676350      | -2.252202 | 0.300912  |
| H                                                                                           | -6.836622      | -2.369342 | -0.929721 |
| H                                                                                           | -7.043221      | -1.321106 | -3.167993 |
| H                                                                                           | -5.106674      | -0.132972 | -4.166574 |
| C                                                                                           | -2.421788      | -0.954917 | -0.554873 |
| N                                                                                           | -1.460939      | -0.242833 | -0.546227 |
| Mg                                                                                          | 0.242164       | 0.143496  | 0.653451  |
| C                                                                                           | -0.300137      | -1.243610 | 2.484570  |
| H                                                                                           | 0.534442       | -1.776432 | 2.000389  |
| H                                                                                           | -0.653538      | -1.986262 | 3.217112  |
| Mg                                                                                          | 2.955513       | 0.025689  | -0.385988 |
| O                                                                                           | 4.531688       | -1.078253 | 0.435434  |
| C                                                                                           | 5.678874       | -0.397728 | 0.997766  |
| C                                                                                           | 4.950913       | -2.312206 | -0.194876 |
| H                                                                                           | 5.648718       | 0.650967  | 0.680830  |
| H                                                                                           | 5.599557       | -0.449271 | 2.091544  |
| C                                                                                           | 6.884637       | -1.148187 | 0.469936  |
| C                                                                                           | 6.342423       | -2.566487 | 0.342221  |
| H                                                                                           | 4.212633       | -3.080424 | 0.050527  |
| H                                                                                           | 4.961206       | -2.161943 | -1.284896 |
| H                                                                                           | 7.749214       | -1.064575 | 1.133721  |
| H                                                                                           | 7.166909       | -0.759425 | -0.516908 |
| H                                                                                           | 6.932785       | -3.201563 | -0.323530 |
| H                                                                                           | 6.291643       | -3.049854 | 1.325742  |
| H                                                                                           | 0.121229       | -0.447830 | 3.115562  |
| Zn                                                                                          | -2.196934      | -1.174333 | 1.698100  |
| C                                                                                           | -3.777684      | -0.216299 | 2.402763  |
| H                                                                                           | -4.550047      | -0.908664 | 2.766921  |
| H                                                                                           | -3.548917      | 0.460991  | 3.238086  |
| H                                                                                           | -4.261234      | 0.390456  | 1.622335  |
| C                                                                                           | -2.149090      | -2.942284 | 0.548737  |
| H                                                                                           | -2.429978      | -3.525788 | 1.444354  |
| H                                                                                           | -2.725252      | -3.371632 | -0.273876 |
| H                                                                                           | -1.083287      | -3.105197 | 0.350638  |
| O                                                                                           | -0.826969      | 1.908735  | 1.369738  |
| C                                                                                           | -0.932506      | 2.236706  | 2.776320  |
| C                                                                                           | -1.850361      | 2.622068  | 0.630189  |
| C                                                                                           | -1.792162      | 3.480269  | 2.829348  |
| H                                                                                           | -1.407512      | 1.390210  | 3.292004  |
| H                                                                                           | 0.078712       | 2.377252  | 3.173063  |
| C                                                                                           | -2.757626      | 3.234968  | 1.677135  |
| H                                                                                           | -1.354069      | 3.395831  | 0.024483  |
| H                                                                                           | -2.348860      | 1.912407  | -0.038888 |
| H                                                                                           | -1.185535      | 4.375441  | 2.642875  |
| H                                                                                           | -2.287916      | 3.595813  | 3.797113  |
| H                                                                                           | -3.247979      | 4.142702  | 1.315416  |
| H                                                                                           | -3.530272      | 2.516160  | 1.976488  |
| O                                                                                           | 1.129046       | 1.296462  | -1.116743 |
| C                                                                                           | 1.334021       | 2.732565  | -0.933325 |
| C                                                                                           | 0.637649       | 1.070857  | -2.467678 |
| C                                                                                           | 0.773482       | 3.397712  | -2.184535 |
| H                                                                                           | 0.809133       | 3.014814  | -0.013220 |

|    |           |           |           |
|----|-----------|-----------|-----------|
| H  | 2.406360  | 2.917406  | -0.807733 |
| C  | -0.134913 | 2.327135  | -2.781748 |
| H  | 1.507237  | 0.943989  | -3.128085 |
| H  | 0.047408  | 0.151809  | -2.446218 |
| H  | 1.587027  | 3.626351  | -2.883366 |
| H  | 0.254804  | 4.333114  | -1.954273 |
| H  | -0.306823 | 2.458209  | -3.853570 |
| H  | -1.109329 | 2.300537  | -2.273743 |
| Cl | 4.305889  | 1.109173  | -1.986876 |
| Cl | 1.485474  | -1.824362 | -0.766051 |
| C  | 2.261636  | 0.724671  | 1.618280  |
| H  | 3.158351  | 1.363997  | 1.502856  |
| H  | 1.602771  | 1.412707  | 2.168510  |
| H  | 2.558573  | -0.047106 | 2.343895  |

**PR<sub>gm</sub> MeMg( $\mu$ -Cl)( $\mu$ -Me)MgCl Zn<sub>THF</sub>3**

| Atom | Coordinate (Å) |           |           |
|------|----------------|-----------|-----------|
|      | x              | y         | z         |
| C    | 3.094538       | -2.891858 | -0.117393 |
| C    | 2.422131       | -2.270183 | -1.171965 |
| C    | 1.484281       | -2.998908 | -1.905578 |
| C    | 1.209267       | -4.322560 | -1.576216 |
| C    | 1.868661       | -4.930612 | -0.510402 |
| C    | 2.812643       | -4.212855 | 0.218742  |
| H    | 3.837982       | -2.330039 | 0.450168  |
| H    | 0.958364       | -2.514262 | -2.726241 |
| H    | 0.474445       | -4.880664 | -2.151849 |
| H    | 1.650445       | -5.964056 | -0.252161 |
| H    | 3.332037       | -4.682942 | 1.051078  |
| C    | 2.716608       | -0.835044 | -1.502928 |
| N    | 1.949481       | 0.110553  | -1.156003 |
| Mg   | 0.194217       | 0.650137  | -0.229649 |
| C    | 0.539945       | 2.843530  | -1.970289 |
| H    | -0.367658      | 2.222540  | -2.042036 |
| H    | 0.729999       | 3.144514  | -3.011933 |
| Mg   | -2.589107      | 0.018800  | 0.218610  |
| O    | -4.283570      | 0.726754  | -0.782154 |
| C    | -5.233165      | 1.582434  | -0.101187 |
| C    | -4.976398      | -0.121954 | -1.730006 |
| H    | -5.013149      | 1.564120  | 0.972565  |
| H    | -5.100463      | 2.604756  | -0.479132 |
| C    | -6.592993      | 1.014365  | -0.448366 |
| C    | -6.358471      | 0.482375  | -1.856868 |
| H    | -4.394447      | -0.136187 | -2.655670 |
| H    | -5.018299      | -1.141152 | -1.317675 |
| H    | -7.385231      | 1.765175  | -0.387397 |
| H    | -6.841370      | 0.190909  | 0.233469  |
| H    | -7.102142      | -0.252505 | -2.176054 |
| H    | -6.352819      | 1.304977  | -2.582587 |
| H    | 0.240439       | 3.759581  | -1.443633 |
| Zn   | 2.309352       | 2.097392  | -1.407679 |
| C    | 4.122504       | 2.774332  | -1.036452 |
| H    | 4.690119       | 2.983765  | -1.954703 |
| H    | 4.127184       | 3.707291  | -0.455070 |
| H    | 4.723696       | 2.043745  | -0.473848 |
| C    | 4.017454       | -0.651273 | -2.245517 |
| H    | 4.857139       | -1.028733 | -1.645090 |
| H    | 4.015613       | -1.236633 | -3.174115 |
| H    | 4.192172       | 0.403698  | -2.477310 |
| O    | 1.577014       | 1.604072  | 1.211674  |
| C    | 1.408168       | 2.862636  | 1.915636  |
| C    | 2.749330       | 0.917118  | 1.719553  |
| C    | 2.407243       | 2.826040  | 3.054815  |
| H    | 1.615407       | 3.676619  | 1.207061  |
| H    | 0.366689       | 2.935808  | 2.246460  |
| C    | 3.526348       | 1.974091  | 2.471352  |

|    |           |           |           |
|----|-----------|-----------|-----------|
| H  | 2.414674  | 0.104259  | 2.384938  |
| H  | 3.279073  | 0.485587  | 0.865392  |
| H  | 1.969331  | 2.333162  | 3.932783  |
| H  | 2.726763  | 3.828058  | 3.352887  |
| H  | 4.188124  | 1.543470  | 3.227555  |
| H  | 4.131436  | 2.559882  | 1.767485  |
| O  | -0.544319 | -0.759480 | 1.314925  |
| C  | -0.509286 | -0.348682 | 2.718342  |
| C  | -0.286133 | -2.193459 | 1.244400  |
| C  | -0.124421 | -1.590150 | 3.508440  |
| H  | 0.229632  | 0.456335  | 2.798138  |
| H  | -1.496796 | 0.037553  | 2.990039  |
| C  | 0.552119  | -2.472522 | 2.465755  |
| H  | -1.254627 | -2.711383 | 1.285120  |
| H  | 0.199507  | -2.393054 | 0.285913  |
| H  | -1.024617 | -2.085778 | 3.891017  |
| H  | 0.518629  | -1.347583 | 4.359488  |
| H  | 0.559899  | -3.53657  | 2.730998  |
| H  | 1.590519  | -2.159963 | 2.284822  |
| Cl | -3.811459 | -1.139349 | 1.862202  |
| Cl | -1.421051 | -0.821107 | -1.709915 |
| C  | -1.589626 | 1.981093  | 0.429635  |
| H  | -2.004871 | 2.143538  | 1.441642  |
| H  | -0.750918 | 2.688278  | 0.391409  |
| H  | -2.304956 | 2.437357  | -0.274511 |

**RC<sub>vi</sub> MgCl( $\mu$ -Cl)( $\mu$ -Me)MeMg Zn<sub>THF</sub>3**

| Atom | Coordinate (Å) |           |           |
|------|----------------|-----------|-----------|
|      | x              | y         | z         |
| C    | 2.876533       | -3.090476 | 0.320648  |
| C    | 2.332118       | -2.162671 | -0.578079 |
| C    | 2.423900       | -2.345183 | -1.963689 |
| C    | 3.062413       | -3.478919 | -2.445442 |
| C    | 3.603974       | -4.407554 | -1.558722 |
| C    | 3.514939       | -4.214720 | -0.180944 |
| H    | 2.793388       | -2.915509 | 1.391513  |
| H    | 1.976454       | -1.606149 | -2.627150 |
| H    | 3.140145       | -3.638607 | -3.516942 |
| H    | 4.103315       | -5.292052 | -1.945290 |
| H    | 3.943731       | -4.942299 | 0.501732  |
| C    | 1.638238       | -1.038546 | -0.053808 |
| N    | 1.042974       | -0.155777 | 0.412693  |
| Mg   | -1.337671      | -0.080066 | -0.751666 |
| Mg   | -0.312295      | 1.092646  | 1.827734  |
| C    | 1.671020       | 2.665231  | 1.969962  |
| H    | 0.720542       | 3.221577  | 1.980752  |
| H    | 2.054235       | 2.738670  | 0.943615  |
| O    | -1.331774      | 2.309369  | 3.231481  |
| C    | -0.716513      | 2.727533  | 4.474415  |
| C    | -2.433533      | 3.189751  | 2.913497  |
| H    | -0.671554      | 1.864777  | 5.147284  |
| H    | 0.307983       | 3.053674  | 4.248955  |
| C    | -1.574445      | 3.869437  | 4.988494  |
| C    | -2.144409      | 4.448076  | 3.699141  |
| H    | -2.452715      | 3.317249  | 1.826872  |
| H    | -3.369177      | 2.712822  | 3.240382  |
| H    | -0.993089      | 4.587259  | 5.573274  |
| H    | -2.384853      | 3.489503  | 5.622777  |
| H    | -3.034697      | 5.064387  | 3.850103  |
| H    | -1.388356      | 5.050698  | 3.178306  |
| H    | 2.337432       | 3.282929  | 2.591008  |
| Zn   | 2.067850       | 0.838168  | 2.762930  |
| C    | 3.776904       | -0.141875 | 2.881855  |
| H    | 4.162591       | -0.397197 | 1.883767  |
| H    | 4.582398       | 0.410396  | 3.384079  |
| H    | 3.662981       | -1.090817 | 3.426806  |

|    |           |           |           |
|----|-----------|-----------|-----------|
| C  | 0.489949  | -0.307323 | 3.544696  |
| H  | 0.601958  | -1.333876 | 3.161468  |
| H  | 0.969566  | -0.306354 | 4.536977  |
| H  | -0.578303 | -0.185729 | 3.784448  |
| O  | -1.171799 | -2.234053 | -0.896630 |
| C  | -1.093254 | -3.154571 | 0.215094  |
| C  | -1.158764 | -2.972969 | -2.142676 |
| C  | -0.680286 | -4.476207 | -0.395626 |
| H  | -0.383076 | -2.751395 | 0.946873  |
| H  | -2.084023 | -3.217064 | 0.688710  |
| C  | -1.382589 | -4.416535 | -1.745677 |
| H  | -1.933471 | -2.557755 | -2.797402 |
| H  | -0.185114 | -2.819660 | -2.625001 |
| H  | -0.977265 | -5.328895 | 0.220627  |
| H  | 0.409875  | -4.511364 | -0.532208 |
| H  | -2.454694 | -4.623694 | -1.626255 |
| H  | -0.979345 | -5.114697 | -2.484103 |
| Cl | -0.143937 | -0.077811 | -2.859313 |
| O  | -3.257554 | -0.041318 | -1.606318 |
| C  | -4.224467 | -1.107861 | -1.481577 |
| C  | -3.572804 | 0.749795  | -2.771190 |
| C  | -5.042961 | -1.089618 | -2.770782 |
| H  | -3.665179 | -2.042340 | -1.338758 |
| H  | -4.834810 | -0.931774 | -0.587909 |
| C  | -4.192185 | -0.248772 | -3.719987 |
| H  | -4.280084 | 1.540315  | -2.483070 |
| H  | -2.638397 | 1.197401  | -3.121865 |
| H  | -6.009496 | -0.601819 | -2.600373 |
| H  | -5.239564 | -2.097937 | -3.145426 |
| H  | -4.775498 | 0.224592  | -4.514299 |
| H  | -3.401581 | -0.852445 | -4.184650 |
| C  | -2.051239 | -0.339678 | 1.403302  |
| H  | -2.901013 | -0.751099 | 0.835491  |
| H  | -1.750934 | -1.165030 | 2.064255  |
| H  | -2.562982 | 0.393570  | 2.052027  |
| Cl | -1.053713 | 2.393563  | -0.239386 |

**TS<sub>vi</sub>\_MgCl(μ-Cl)(μ-Me)MeMgZn<sub>THF3</sub>**

| Atom | Coordinate (Å) |           |           |
|------|----------------|-----------|-----------|
|      | x              | y         | z         |
| C    | 2.737280       | -3.038333 | 0.707808  |
| C    | 2.334851       | -2.046668 | -0.189328 |
| C    | 2.282343       | -2.310017 | -1.562219 |
| C    | 2.653731       | -3.564992 | -2.031352 |
| C    | 3.054648       | -4.555304 | -1.138897 |
| C    | 3.085202       | -4.294430 | 0.230211  |
| H    | 2.761376       | -2.817779 | 1.773100  |
| H    | 1.934439       | -1.533599 | -2.243700 |
| H    | 2.625049       | -3.768886 | -3.098777 |
| H    | 3.342620       | -5.535794 | -1.509630 |
| H    | 3.389516       | -5.070767 | 0.926989  |
| C    | 1.853524       | -0.747053 | 0.254407  |
| N    | 0.982928       | 0.054034  | 0.082343  |
| Mg   | -0.998217      | 0.073384  | -0.907981 |
| Mg   | -0.144118      | 1.677235  | 1.334625  |
| C    | 1.896918       | 2.214305  | 2.269378  |
| H    | 1.226820       | 3.017478  | 2.611035  |
| H    | 2.354308       | 2.550057  | 1.325969  |
| O    | -1.163223      | 3.010899  | 2.614473  |
| C    | -1.089820      | 2.858069  | 4.050985  |
| C    | -2.448284      | 3.572346  | 2.246041  |
| H    | -0.619341      | 1.893570  | 4.274186  |
| H    | -0.453324      | 3.658197  | 4.453354  |
| C    | -2.520294      | 2.982371  | 4.527540  |
| C    | -3.072861      | 4.015686  | 3.553021  |
| H    | -2.272716      | 4.374579  | 1.524256  |

|    |           |           |           |
|----|-----------|-----------|-----------|
| H  | -3.039659 | 2.782988  | 1.762315  |
| H  | -2.585670 | 3.285173  | 5.575834  |
| H  | -3.044387 | 2.024800  | 4.409024  |
| H  | -4.164723 | 4.031759  | 3.502829  |
| H  | -2.726726 | 5.020102  | 3.826369  |
| H  | 2.705615  | 2.257668  | 3.012781  |
| Zn | 1.905242  | 0.142713  | 2.446594  |
| C  | 3.716831  | -0.112018 | 1.419399  |
| H  | 3.938227  | 0.470442  | 0.518318  |
| H  | 4.149251  | 0.459020  | 2.260703  |
| H  | 4.241317  | -1.067410 | 1.372611  |
| C  | 1.035663  | -1.149385 | 3.656482  |
| H  | 0.415986  | -1.873529 | 3.107799  |
| H  | 1.772203  | -1.736500 | 4.221755  |
| H  | 0.373300  | -0.675384 | 4.392906  |
| O  | -1.105522 | -2.104198 | -0.899970 |
| C  | -1.027827 | -3.013453 | 0.218766  |
| C  | -1.253960 | -2.856214 | -2.128293 |
| C  | -0.794341 | -4.378883 | -0.391040 |
| H  | -0.228161 | -2.671248 | 0.887443  |
| H  | -1.985628 | -2.980899 | 0.761974  |
| C  | -1.584492 | -4.266597 | -1.688871 |
| H  | -2.033044 | -2.375208 | -2.730165 |
| H  | -0.307250 | -2.799944 | -2.681096 |
| H  | -1.133334 | -5.186430 | 0.263398  |
| H  | 0.272985  | -4.527381 | -0.602562 |
| H  | -2.661017 | -4.366435 | -1.491619 |
| H  | -1.304788 | -5.009570 | -2.440711 |
| Cl | -0.116373 | 0.091819  | -3.159266 |
| O  | -3.020275 | 0.087204  | -1.499459 |
| C  | -4.023152 | -0.873440 | -1.116750 |
| C  | -3.494100 | -0.784028 | -2.666716 |
| C  | -4.892764 | -1.102609 | -2.358815 |
| H  | -3.493873 | -1.771631 | -0.780064 |
| H  | -4.597441 | -0.471482 | -0.272656 |
| C  | -4.192236 | -0.298343 | -3.457365 |
| H  | -4.185580 | 1.579363  | -2.351544 |
| H  | -2.622854 | 1.222813  | -3.160448 |
| H  | -5.905210 | -0.720620 | -2.190310 |
| H  | -4.978407 | -2.165070 | -2.607255 |
| H  | -4.885566 | 0.100568  | -4.202714 |
| H  | -3.442547 | -0.906548 | -3.979902 |
| C  | -1.761207 | 0.175285  | 1.408128  |
| H  | -2.772966 | 0.591557  | 1.282491  |
| H  | -1.836951 | -0.897540 | 1.187824  |
| H  | -1.583269 | 0.160682  | 2.499666  |
| Cl | -0.756412 | 2.735647  | -0.745700 |

**PR<sub>vi</sub>\_MgCl(μ-Cl)(μ-Me)MeMg Zn<sub>THF3</sub>**

| Atom | Coordinate (Å) |           |           |
|------|----------------|-----------|-----------|
|      | x              | y         | z         |
| C    | 3.265470       | -2.638404 | -0.499250 |
| C    | 2.406540       | -1.534921 | -0.428870 |
| C    | 2.008420       | -0.916659 | -1.616206 |
| C    | 2.434385       | -1.401430 | -2.846119 |
| C    | 3.264170       | -2.518718 | -2.907714 |
| C    | 3.680679       | -3.135064 | -1.730746 |
| H    | 3.591845       | -3.134035 | 0.413574  |
| H    | 1.364562       | -0.041535 | -1.570150 |
| H    | 2.116867       | -0.901264 | -3.758741 |
| H    | 3.594156       | -2.902536 | -3.870142 |
| H    | 4.333122       | -4.004118 | -1.770731 |
| C    | 1.877815       | -1.057164 | 0.881463  |
| N    | 0.694352       | -0.586880 | 1.013190  |
| Mg   | -1.085524      | -0.565039 | -0.119604 |
| Mg   | 0.252038       | 1.613571  | 1.552283  |

|                                                                     |                |           |           |    |           |           |           |
|---------------------------------------------------------------------|----------------|-----------|-----------|----|-----------|-----------|-----------|
| C                                                                   | 0.528486       | 1.049697  | 3.920593  | H  | -0.400874 | 0.593277  | -2.927121 |
| H                                                                   | -0.256363      | 1.521747  | 4.525410  | H  | -0.394723 | 2.237008  | -2.300042 |
| H                                                                   | 1.190506       | 1.869785  | 3.587899  | Zn | 1.914154  | 1.056019  | -1.822843 |
| O                                                                   | -0.377160      | 3.589675  | 2.007322  | C  | 3.571252  | 1.229313  | -2.889304 |
| C                                                                   | -1.171237      | 4.040422  | 3.122752  | H  | 3.717327  | 0.367368  | -3.556245 |
| C                                                                   | -0.575162      | 4.472661  | 0.873853  | H  | 3.589791  | 2.119404  | -3.533811 |
| H                                                                   | -1.581895      | 3.162368  | 3.632267  | H  | 4.468809  | 1.287497  | -2.255963 |
| H                                                                   | -0.517470      | 4.578505  | 3.823003  | O  | -3.642847 | 0.333682  | -0.234571 |
| C                                                                   | -2.216359      | 4.946632  | 2.511215  | C  | -3.536563 | 1.499510  | -1.088106 |
| C                                                                   | -1.420613      | 5.617373  | 1.397984  | C  | -4.920659 | -0.315740 | -0.440601 |
| H                                                                   | 0.408837       | 4.765836  | 0.497206  | C  | -4.925901 | 1.699871  | -1.657701 |
| H                                                                   | -1.095048      | 3.902227  | 0.088168  | H  | -3.177751 | 2.338297  | -0.482506 |
| H                                                                   | -2.637759      | 5.649192  | 3.235136  | H  | -2.789086 | 1.287730  | -1.866151 |
| H                                                                   | -3.034641      | 4.346345  | 2.091944  | C  | -5.447504 | 0.270250  | -1.732935 |
| H                                                                   | -2.045403      | 6.058264  | 0.616890  | H  | -4.745767 | -1.396458 | -0.465068 |
| H                                                                   | -0.781729      | 6.407579  | 1.810917  | H  | -5.569348 | -0.079298 | 0.412951  |
| H                                                                   | 1.172959       | 0.513089  | 4.631928  | H  | -4.904381 | 2.209921  | -2.624400 |
| Zn                                                                  | -0.198358      | -0.540138 | 2.879579  | H  | -5.541273 | 2.292970  | -0.970119 |
| C                                                                   | 2.804703       | -1.233941 | 2.061308  | H  | -5.015804 | -0.250388 | -2.597598 |
| H                                                                   | 3.862075       | -1.169022 | 1.787062  | H  | -6.536442 | 0.204742  | -1.803580 |
| H                                                                   | 2.590867       | -0.478581 | 2.824243  | O  | 3.327582  | -1.819078 | 0.999895  |
| H                                                                   | 2.638078       | -2.222198 | 2.516948  | C  | 3.099723  | -3.150202 | 1.524002  |
| C                                                                   | -1.298627      | -2.130543 | 3.223136  | C  | 4.617464  | -1.767560 | 0.341983  |
| H                                                                   | -2.010121      | -2.323952 | 2.406301  | C  | 4.444076  | -3.842416 | 1.441668  |
| H                                                                   | -0.681356      | -3.033974 | 3.322083  | H  | 2.695049  | -3.051071 | 2.535069  |
| H                                                                   | -1.890773      | -2.043179 | 4.142106  | H  | 2.352470  | -3.651186 | 0.889935  |
| O                                                                   | -0.759998      | -2.586572 | -0.701508 | C  | 5.036526  | -3.213498 | 0.186617  |
| C                                                                   | -0.204789      | -3.672235 | 0.069102  | H  | 4.499551  | -1.234489 | -0.608986 |
| C                                                                   | -1.044261      | -3.026302 | -2.049578 | H  | 5.305985  | -1.202933 | 0.984082  |
| C                                                                   | 0.167892       | -4.721439 | -0.955944 | H  | 4.345268  | -4.929544 | 1.383002  |
| H                                                                   | 0.640230       | -3.287948 | 0.650403  | H  | 5.056866  | -3.599043 | 2.318379  |
| H                                                                   | -0.972709      | -4.033072 | 0.771376  | H  | 4.575298  | -3.646160 | -0.711026 |
| C                                                                   | -0.927254      | -4.535229 | -1.999211 | H  | 6.120802  | -3.326583 | 0.106146  |
| H                                                                   | -2.037524      | -2.651668 | -2.323716 | N  | -1.417750 | 1.481198  | 1.289508  |
| H                                                                   | -0.296420      | -2.578764 | -2.719411 | C  | -0.724401 | 2.410050  | 1.262786  |
| H                                                                   | 0.206446       | -5.727578 | -0.530050 | C  | 0.136414  | 3.537932  | 1.185218  |
| H                                                                   | 1.150932       | -4.485733 | -1.388335 | C  | 0.922342  | 3.898150  | 2.286273  |
| H                                                                   | -1.868183      | -4.984358 | -1.652452 | C  | 0.218019  | 4.235584  | -0.026620 |
| H                                                                   | -0.683303      | -4.964560 | -2.974545 | C  | 1.799299  | 4.964972  | 2.163483  |
| Cl                                                                  | -1.133627      | 0.633839  | -2.171774 | H  | 0.846648  | 3.336817  | 3.213261  |
| O                                                                   | -3.133657      | -1.221827 | -0.348046 | C  | 1.102470  | 5.297945  | -0.132889 |
| C                                                                   | -3.750532      | -2.411777 | 0.157984  | H  | -0.398251 | 3.925179  | -0.867048 |
| C                                                                   | -4.206438      | -0.420511 | -0.864482 | C  | 1.890753  | 5.658268  | 0.958449  |
| C                                                                   | -4.915313      | -2.706503 | -0.794098 | H  | 2.417919  | 5.253900  | 3.007870  |
| H                                                                   | -2.983790      | -3.191879 | 0.189180  | H  | 1.179659  | 5.845056  | -1.067709 |
| H                                                                   | -4.101088      | -2.218244 | 1.184123  | H  | 2.585024  | 6.489396  | 0.868493  |
| C                                                                   | -5.044467      | -1.422686 | -1.633451 | C  | 1.715726  | -1.869416 | -1.849218 |
| H                                                                   | -4.760046      | 0.020821  | -0.019562 | H  | 1.095397  | -1.496400 | -2.677169 |
| H                                                                   | -3.760903      | 0.374273  | -1.468430 | H  | 2.726442  | -2.011699 | -2.266386 |
| H                                                                   | -5.828540      | -2.919932 | -0.230780 | H  | 1.339865  | -2.885832 | -1.628181 |
| H                                                                   | -4.708048      | -3.577272 | -1.424201 | C  | 2.558124  | 1.226196  | 0.299699  |
| H                                                                   | -6.079642      | -1.093619 | -1.757505 | H  | 2.439637  | 2.294595  | 0.058880  |
| H                                                                   | -4.614046      | -1.566152 | -2.631495 | H  | 2.130857  | 1.156208  | 1.318452  |
| C                                                                   | -1.948228      | 1.062510  | 1.413064  | H  | 3.642363  | 1.072609  | 0.412240  |
| H                                                                   | -2.397843      | 1.787095  | 0.712666  | Cl | 0.067568  | -1.336305 | 1.701310  |
| H                                                                   | -2.666711      | 0.229075  | 1.464719  | O  | -2.392507 | -2.176542 | -0.150392 |
| H                                                                   | -2.065835      | 1.518908  | 2.407894  | C  | -1.887562 | -2.079582 | -1.505561 |
| Cl                                                                  | 2.236947       | 2.419043  | 0.555769  | C  | -2.280100 | -3.537703 | 0.325600  |
| <b>RC<sub>vi</sub> MgCl(μ-Cl)Me<sub>2</sub>Mg Zn<sub>THF</sub>3</b> |                |           |           | C  | -1.629871 | -3.508266 | -1.942621 |
| Atom                                                                | Coordinate (Å) |           |           | H  | -2.634269 | -1.550164 | -2.109636 |
|                                                                     | x              | y         | z         | H  | -0.957920 | -1.489362 | -1.490530 |
| Mg                                                                  | -2.241131      | -0.513276 | 1.088820  | C  | -1.299828 | -4.193774 | -0.621211 |
| Mg                                                                  | 1.776332       | -0.813609 | 0.010112  | H  | -1.946659 | -3.508309 | 1.367651  |
| C                                                                   | -0.051115      | 1.212677  | -2.087758 | H  | -3.276324 | -3.998261 | 0.279039  |
| H                                                                   | -0.613856      | 0.883022  | -1.201143 | H  | -0.816738 | -3.564091 | -2.672631 |
|                                                                     |                |           |           | H  | -2.530273 | -3.947625 | -2.389171 |

|    |           |           |           |
|----|-----------|-----------|-----------|
| H  | -0.271453 | -3.956061 | -0.316726 |
| H  | -1.412563 | -5.280742 | -0.652860 |
| Cl | -3.591683 | -1.013430 | 2.912273  |

**TS<sub>vi</sub> MgCl(μ-Cl)Me<sub>2</sub>Mg ZnTHF<sub>3</sub>**

| Atom | Coordinate (Å) |           |           |
|------|----------------|-----------|-----------|
|      | x              | y         | z         |
| Mg   | 1.552610       | -2.285473 | 0.579127  |
| Mg   | 0.312897       | 1.136670  | 1.639112  |
| C    | -2.212409      | -1.537711 | 3.066886  |
| H    | -2.221838      | -1.754963 | 1.990058  |
| H    | -3.235980      | -1.270282 | 3.382839  |
| H    | -2.016501      | -2.491400 | 3.574738  |
| Zn   | -1.690769      | 0.549252  | 3.050946  |
| C    | -3.054816      | 1.658703  | 3.997324  |
| H    | -4.070981      | 1.557755  | 3.587853  |
| H    | -3.125442      | 1.369046  | 5.057937  |
| H    | -2.824891      | 2.735077  | 3.995623  |
| O    | 0.789344       | -4.234115 | 0.863336  |
| C    | -0.002051      | -4.737264 | 1.963727  |
| C    | 0.961032       | -5.262418 | -0.136768 |
| C    | -0.120918      | -6.227941 | 1.715852  |
| H    | 0.501872       | -4.478883 | 2.901280  |
| H    | -0.980691      | -4.235097 | 1.943694  |
| C    | -0.090445      | -6.299595 | 0.194087  |
| H    | 0.849405       | -4.795336 | -1.122819 |
| H    | 1.980180       | -5.661494 | -0.056929 |
| H    | -1.028309      | -6.648419 | -2.157245 |
| H    | 0.742427       | -6.756596 | 2.138073  |
| H    | -1.064300      | -6.007870 | -0.221376 |
| H    | 0.164806       | -7.289095 | -0.194027 |
| O    | 0.464578       | 3.108567  | 1.023121  |
| C    | 0.901053       | 3.482404  | -0.308179 |
| C    | -0.525637      | 4.055287  | 1.502451  |
| C    | 0.364457       | 4.882909  | -0.516414 |
| H    | 1.990724       | 3.399741  | -0.343426 |
| H    | 0.468753       | 2.770289  | -1.026712 |
| C    | -0.936726      | 4.840411  | 0.275913  |
| H    | -1.339822      | 3.491997  | 1.973996  |
| H    | -0.048494      | 4.691959  | 2.258678  |
| H    | 0.225500       | 5.117078  | -1.575028 |
| H    | 1.049624       | 5.624179  | -0.087369 |
| H    | -1.709168      | 4.297583  | -0.284312 |
| H    | -1.328933      | 5.828618  | 0.529607  |
| N    | 0.588297       | -1.761249 | 2.336446  |
| C    | 0.050251       | -1.579723 | 3.376365  |
| C    | 0.217315       | -1.688620 | 4.819993  |
| C    | -0.770592      | -1.398059 | 5.760751  |
| C    | 1.484283       | -2.109991 | 5.247044  |
| C    | -0.494595      | -1.527981 | 7.114970  |
| H    | -1.746478      | -1.065281 | 5.415625  |
| C    | 1.751817       | -2.242011 | 6.602426  |
| H    | 2.247967       | -2.329524 | 4.504297  |
| C    | 0.763083       | -1.950392 | 7.537879  |
| H    | -1.266407      | -1.298060 | 7.844510  |
| H    | 2.734989       | -2.570828 | 6.928391  |
| H    | 0.973177       | -2.051184 | 8.599677  |
| C    | -1.672324      | 0.631949  | 0.829291  |
| H    | -1.262788      | -0.189823 | 0.218902  |
| H    | -2.734530      | 0.384791  | 0.949592  |
| H    | -1.672510      | 1.530501  | 0.186037  |
| C    | 0.256415       | 1.423677  | 3.803670  |
| H    | -0.103304      | 1.080318  | 4.779633  |
| H    | 1.335488       | 1.171322  | 3.829452  |
| H    | 0.196322       | 2.522631  | 3.850425  |
| Cl   | 2.089215       | 0.260097  | 0.302679  |

|    |           |           |           |
|----|-----------|-----------|-----------|
| O  | 0.214383  | -2.142979 | -0.993637 |
| C  | -1.144123 | -2.616521 | -1.002337 |
| C  | 0.488596  | -1.616501 | -2.302711 |
| C  | -1.880190 | -1.753887 | -2.034302 |
| H  | -1.145851 | -3.680636 | -1.280703 |
| H  | -1.529050 | -2.519603 | 0.019231  |
| C  | -0.782691 | -0.872687 | -2.649602 |
| H  | 1.383427  | -0.992399 | -2.228350 |
| H  | 0.683698  | -2.457072 | -2.986826 |
| H  | -2.662207 | -1.148983 | -1.565134 |
| H  | -2.354739 | -2.386643 | -2.790475 |
| H  | -0.768852 | 0.114316  | -2.170106 |
| H  | -0.903009 | -0.728346 | -3.726465 |
| Cl | 3.593537  | -3.012045 | -0.318402 |

**PR<sub>vi</sub> MgCl(μ-Cl)Me<sub>2</sub>Mg ZnTHF<sub>3</sub>**

| Atom | Coordinate (Å) |           |           |
|------|----------------|-----------|-----------|
|      | x              | y         | z         |
| Mg   | 1.328785       | -1.197611 | -0.374338 |
| Mg   | -0.220515      | 1.701721  | 0.014971  |
| C    | -2.074774      | -0.372033 | 2.271199  |
| H    | -2.587212      | 0.176604  | 1.473573  |
| H    | -2.157503      | 0.176722  | 3.218718  |
| H    | -2.618805      | -1.316714 | 2.405724  |
| Zn   | -2.312502      | 2.555486  | 1.150046  |
| C    | -3.930498      | 2.858486  | 2.219983  |
| H    | -4.705278      | 2.116995  | 1.980548  |
| H    | -3.721467      | 2.766533  | 3.294573  |
| H    | -4.383415      | 3.846817  | 2.068900  |
| O    | 0.414348       | -3.178912 | -0.271392 |
| C    | -0.763907      | -3.630685 | 0.424597  |
| C    | 0.873241       | -4.205271 | -1.181574 |
| C    | -0.843874      | -5.118997 | 0.150659  |
| H    | -0.654595      | -3.384601 | 1.485460  |
| H    | -1.639071      | -3.094095 | 0.025642  |
| C    | -0.257996      | -5.211279 | -1.252016 |
| H    | 1.110375       | -3.728586 | -2.139841 |
| H    | 1.792852       | -4.642162 | -0.773376 |
| H    | -1.865460      | -5.501116 | 0.227046  |
| H    | -0.216751      | -5.670100 | 0.862075  |
| H    | -1.003443      | -4.908308 | -1.999300 |
| H    | 0.095521       | -6.211970 | -1.514741 |
| O    | -0.003957      | 3.613268  | -1.049369 |
| C    | 0.207654       | 3.681422  | -2.471974 |
| C    | -0.490307      | 4.883519  | -0.570010 |
| C    | 0.328088       | 5.158477  | -2.773103 |
| H    | 1.095722       | 3.085116  | -2.705043 |
| H    | -0.667267      | 3.245175  | -2.983348 |
| C    | -0.696895      | 5.738682  | -1.806847 |
| H    | -1.414050      | 4.720276  | -0.000746 |
| H    | 0.263797       | 5.302034  | 0.109003  |
| H    | 0.122031       | 5.390776  | -3.821310 |
| H    | 1.336639       | 5.514673  | -2.530077 |
| H    | -1.710702      | 5.595145  | -2.202487 |
| H    | -0.558677      | 6.803402  | -1.601422 |
| N    | -0.132700      | -0.292127 | 0.770484  |
| C    | -0.639644      | -0.650646 | 1.883105  |
| C    | 0.156891       | -1.379837 | 2.928720  |
| C    | -0.421605      | -2.256312 | 3.854938  |
| C    | 1.532313       | -1.135060 | 3.015464  |
| C    | 0.360658       | -2.907617 | 4.802014  |
| H    | -1.491605      | -2.452959 | 3.827423  |
| C    | 2.314755       | -1.774857 | 3.969091  |
| H    | 1.979250       | -0.406945 | 2.338158  |
| C    | 1.730884       | -2.670906 | 4.860078  |
| H    | -0.102822      | -3.601328 | 5.499437  |



---

|    |           |           |           |
|----|-----------|-----------|-----------|
| H  | 3.380214  | -1.565520 | 4.022527  |
| H  | 2.340573  | -3.175584 | 5.605458  |
| C  | -2.437277 | 1.890179  | -0.814943 |
| H  | -1.738158 | 1.494245  | -1.579211 |
| H  | -3.231651 | 1.131386  | -0.771761 |
| H  | -2.868129 | 2.771204  | -1.316370 |
| C  | -0.437162 | 2.822874  | 2.029826  |
| H  | -0.435510 | 2.188595  | 2.927435  |
| H  | 0.623240  | 2.853883  | 1.710646  |
| H  | -0.607728 | 3.850745  | 2.379593  |
| Cl | 2.042688  | 1.267529  | -0.821021 |
| O  | 0.409862  | -1.193755 | -2.250881 |
| C  | -1.011883 | -1.406302 | -2.396516 |

---

---

|    |           |           |           |
|----|-----------|-----------|-----------|
| C  | 0.950391  | -0.688171 | -3.484559 |
| C  | -1.390385 | -0.799373 | -3.744834 |
| H  | -1.216600 | -2.482974 | -2.340847 |
| H  | -1.502032 | -0.913927 | -1.544432 |
| C  | -0.197919 | 0.094027  | -4.077968 |
| H  | 1.832123  | -0.089894 | -3.235806 |
| H  | 1.246468  | -1.536057 | -4.120121 |
| H  | -2.336539 | -0.252166 | -3.694435 |
| H  | -1.496438 | -1.584253 | -4.502377 |
| H  | -0.281356 | 1.062776  | -3.565398 |
| H  | -0.081580 | 0.280517  | -5.148754 |
| Cl | 3.505784  | -2.112548 | -0.548269 |

---

## 11. References.

- [1] J. A. Murphy, A. G. J. Commeureuc, T. N. Snaddon, T. M. McGuire, T. A. Khan, K. Hisler, M. L. Dewis and R. *Org. Lett.* 2005, **7**, 1427–1429.
- [2] D. Elorriaga, F. Carrillo-Hermosilla, B. Parra-Cadenas, A. Antiñolo and J. García-Álvarez, *ChemSusChem* 2022, **15**, e202201348.
- [3] B. Zhao and X. Lu, *Tetrahedron Lett.* 2006, **47**, 6765–6768.
- [4] L. Ackermann and L. T. Kaspar, *J. Org. Chem.* 2007, **72**, 6149–6153.
- [5] B. Zhao and X. Lu, *Org. Lett.* 2006, **8**, 5987–5990.
- [6] D. J. Fox, D. S. Pedersen and S. Warren, *Org. Biomol. Chem.* 2006, **4**, 3102–3107.
- [7] N. R. Vautravers, D. D. Regent and B. Breit, *Chem. Commun.* 2011, **47**, 6635–6637.
- [8] L. Li, P. Cai, Q. Guo and S. Xue, *J. Org. Chem.* 2008, **73**, 3516–3522.
- [9] P. C. Meltzer, D. Butler, J. R. Deschamps and B. K. Madras, *J. Med. Chem.* 2006, **49**, 1420–1432.
- [10] D. T. Genna and G. H. Posner, *Org. Lett.* 2011, **13**, 5358–5361.
- [11] P. Ulrich and A. Cerami, *J. Med. Chem.* 1984, **27**, 35–40.
- [12] S. Kotani, K. Osakama, M. Sugiura and M. Nakajima, *Org. Lett.* 2011, **13**, 3968–3971.
- [13] Bandna, N. Aggarwal and P. Das, *Tetrahedron Lett.* 2011, **52**, 4954–4956.
- [14] S. P. Y. Cutulic, N. J. Findlay, S.-Z. Zhou, E. J. T. Chrystal and J. A. Murphy, *J. Org. Chem.* 2009, **74**, 8713–8718.
- [15] X. Quan, S. Kerdphon and P. G. Andersson, *Chem. Eur. J.* 2015, **21**, 3576–3579.
- [16] P. Biswal, S. Samser, S. K. Meher, V. Chandrasekhar and K. Venkatasubbaiah, *Adv. Synth. Catal.* 2022, **364**, 413–419.
- [17] Z. Li and V. Gevorgyan, *Angew. Chem. Int. Ed.* 2011, **50**, 2808–2810.
- [18] K. Chakrabarti, M. Maji, D. Panja, B. Paul, S. Shee, G. K. Das and S. Kundu, *Org. Lett.* 2017, **19**, 4750–4753.
- [19] A. Hirao, I. Hattori, K. Yamaguchi, S. Nakahama and N. Yamazaki, *Synthesis* 1982, **1982**, 461–462.
- [20] P. Falus, Z. Boros, G. Hornyánszky, J. Nagy, F. Darvas, L. Üрге and L. Poppe, *Tetrahedron Lett.* 2011, **52**, 1310–1312.
- [21] C. Maccallini, A. Patruno, F. Lannutti, A. Ammazalorso, B. D. Filippis, M. Fantacuzzi, S. Franceschelli, L. Giampietro, S. Masella, M. Felaco, N. Re and R. Amoroso, *Bioorg. Med. Chem. Lett.* 2010, **20**, 6495–6499.
- [22] A. Solladie-Cavallo and D. Farchani, *Tetrahedron Lett.* 1986, **27**, 1331–1334.
- [23] M. J. Frisch, G. W. Trucks, H. B. Schlegel, G. E. Scuseria, M. A. Robb, J. R. Cheeseman, G.

- Scalmani, V. Barone, G. A. Petersson, H. Nakatsuji, X. Li, M. Caricato, A. V. Marenich, J. Bloino, B. G. Janesko, R. Gomperts, B. Mennucci, H. P. Hratchian, J. V. Ortiz, A. F. Izmaylov, J. L. Sonnenberg, D. Williams-Young, F. Ding, F. Lipparini, F. Egidi, J. Goings, B. Peng, A. Petrone, T. Henderson, D. Ranasinghe, V. G. Zakrzewski, J. Gao, N. Rega, G. Zheng, W. Liang, M. Hada, M. Ehara, K. Toyota, R. Fukuda, J. Hasegawa, M. Ishida, T. Nakajima, Y. Honda, O. Kitao, H. Nakai, T. Vreven, K. Throssell, J. A. Montgomery Jr., J. E. Peralta, F. Ogliaro, M. J. Bearpark, J. J. Heyd, E. N. Brothers, K. N. Kudin, V. N. Staroverov, T. A. Keith, R. Kobayashi, J. Normand, K. Raghavachari, A. P. Rendell, J. C. Burant, S. S. Iyengar, J. Tomasi, M. Cossi, J. M. Millam, M. Klene, C. Adamo, R. Cammi, J. W. Ochterski, R. L. Martin, K. Morokuma, O. Farkas, J. B. Foresman and D. J. Fox, Gaussian 16, Rev. A.03; Gaussian, Inc., Wallingford, CT, 2016.
- [24] Y. Zhao and D. Truhlar, *Theor. Chem. Acc.* 2008, **120**, 215–241.
- [25] B. Chan, A. T. B. Gilbert, P. M. W. Gill and L. Radom, *J. Chem. Theor. Comput.* 2014, **10**, 3777–3783.
- [26] W. J. Hehre, L. Radom, P. v. R. Schleyer and J. A. Pople, *Ab Initio Molecular Orbital Theory*; Wiley: New York, 1986.
- [27] D. Figgen, K. A. Peterson, M. Dolg and H. Stoll, *J. Chem. Phys.* 2009, **130**, 164108.
- [28] S. Yamazaki and S. Yamabe, *J. Org. Chem.* 2002, **67**, 9346–9353.
- [29] T. Mori and S. Kato, *J. Phys. Chem. A* 2009, **113**, 6158–6165.
- [30] R. M. Peltzer, O. Eisenstein, A. Nova and M. Cascella, *J. Phys. Chem. B* 2017, **121**, 4226–4237.
- [31] R. M. Peltzer, J. Gauss, O. Eisenstein and M. Cascella, *J. Am. Chem. Soc.* 2020, **142**, 2984–2994.

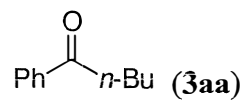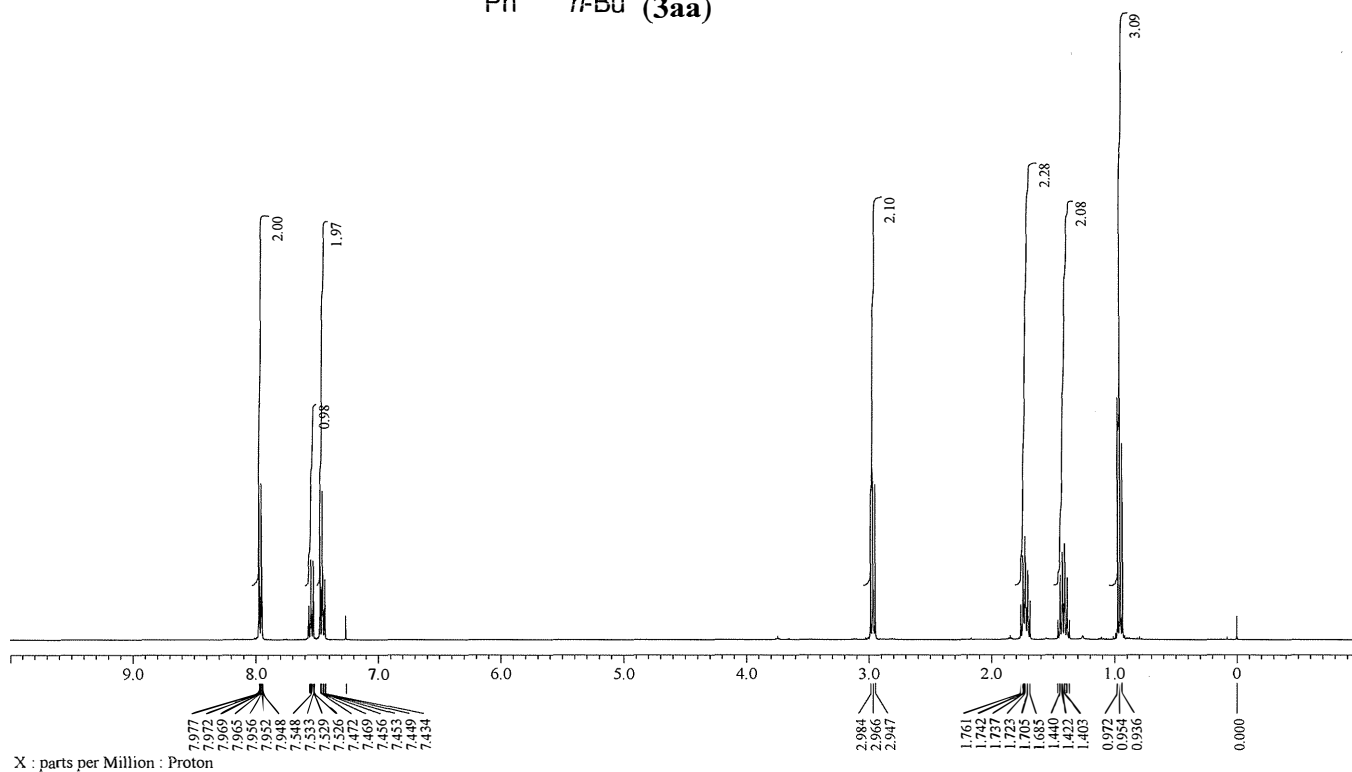

X : parts per Million : Proton

<sup>1</sup>H NMR, 400 MHz, CDCl<sub>3</sub>

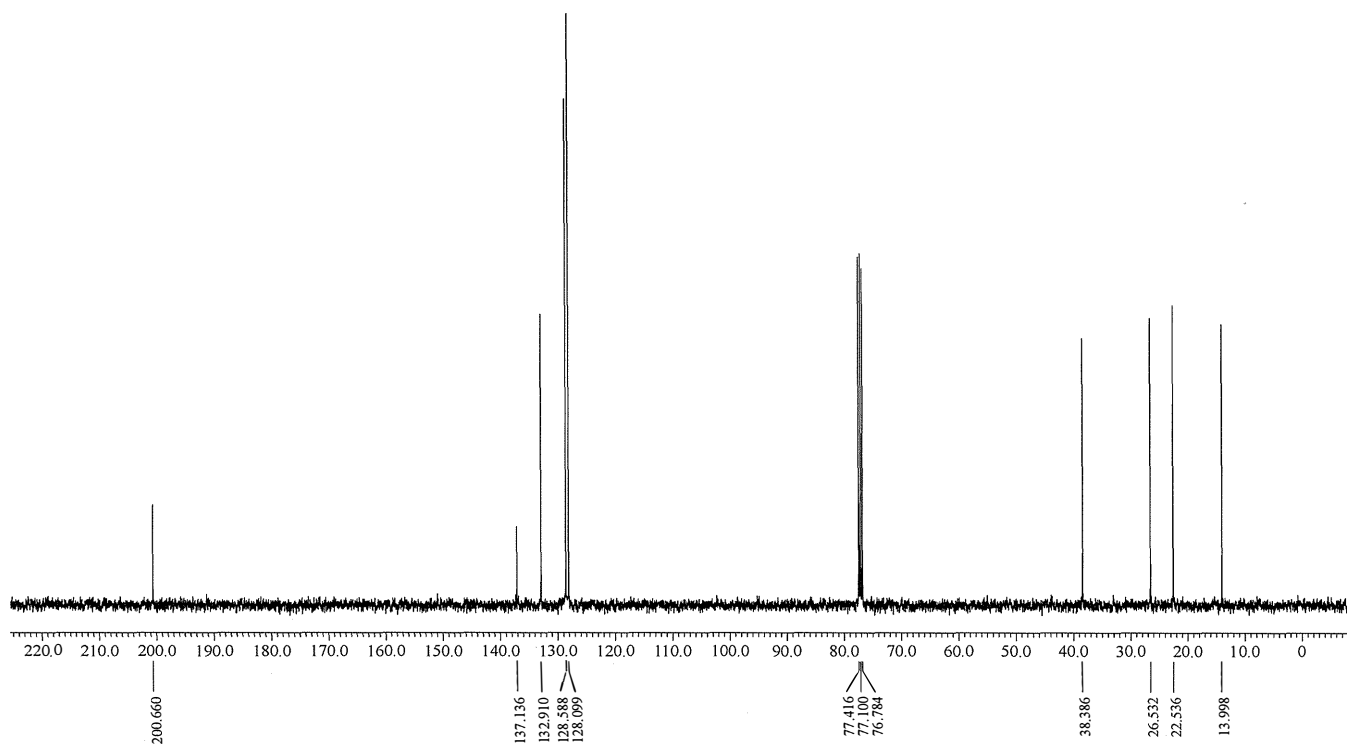

X : parts per Million : Carbon13

<sup>13</sup>C NMR, 100 MHz, CDCl<sub>3</sub>

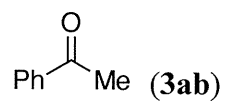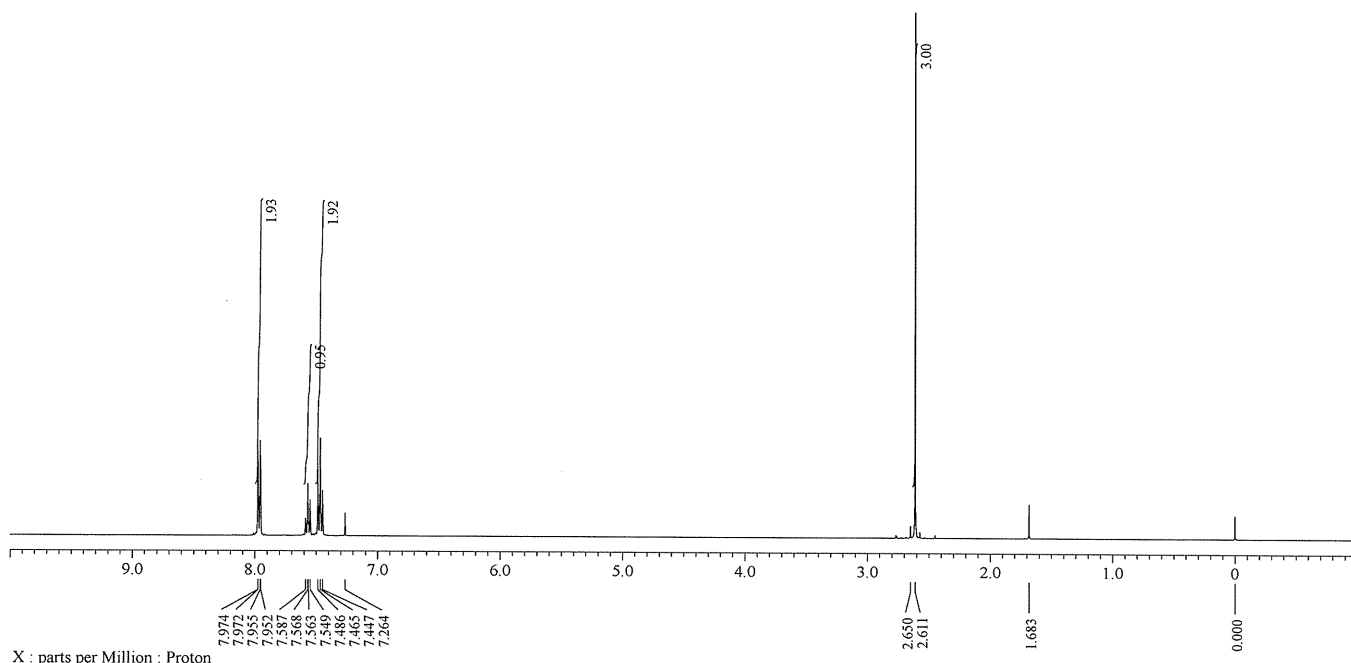

$^1\text{H}$  NMR, 400 MHz,  $\text{CDCl}_3$

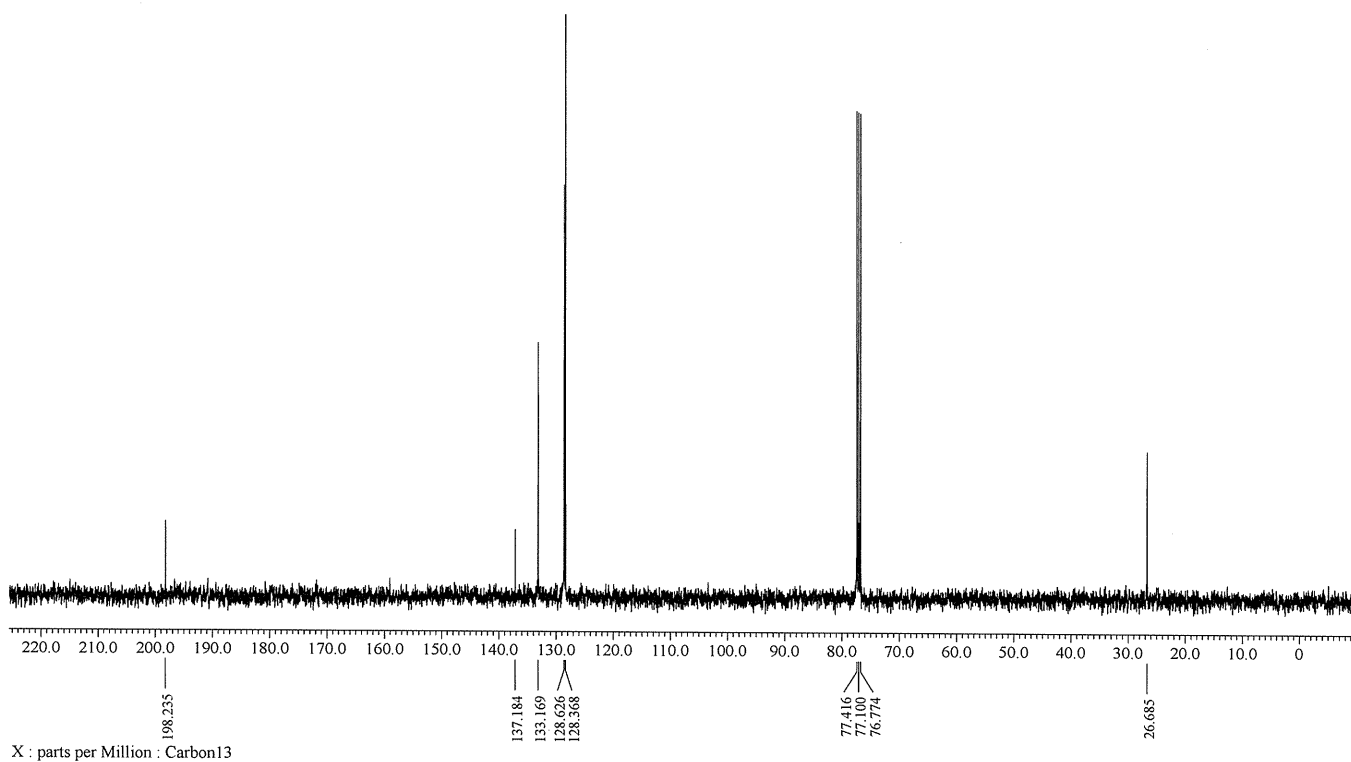

$^{13}\text{C}$  NMR, 100 MHz,  $\text{CDCl}_3$

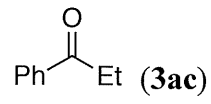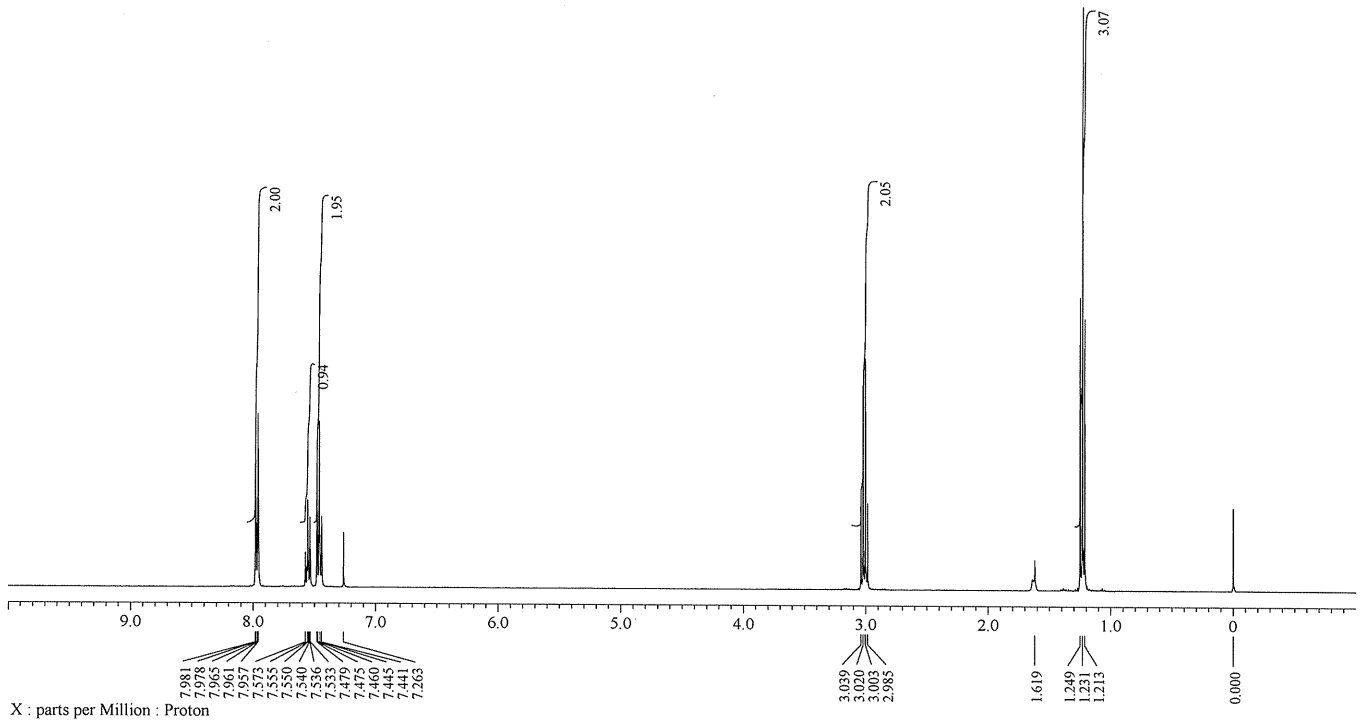

X : parts per Million : Proton

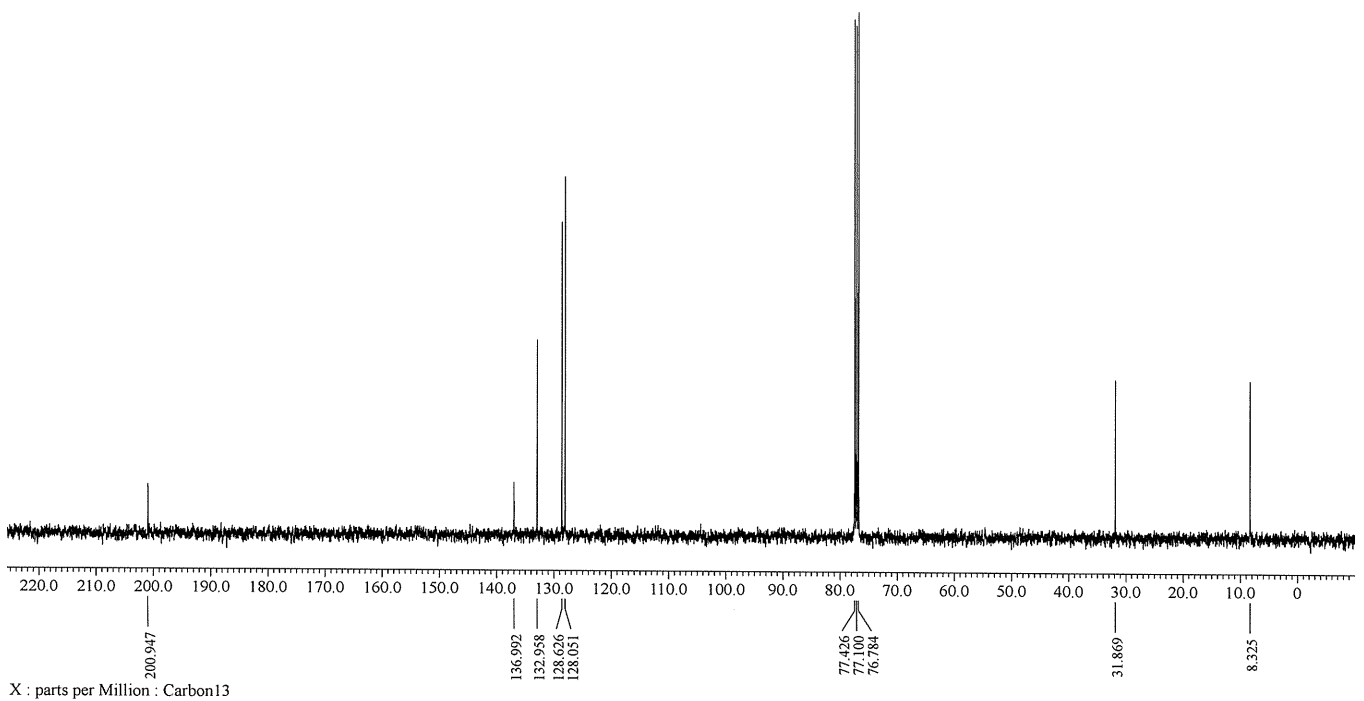

X : parts per Million : Carbon13

<sup>13</sup>C NMR, 100 MHz, CDCl<sub>3</sub>

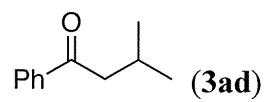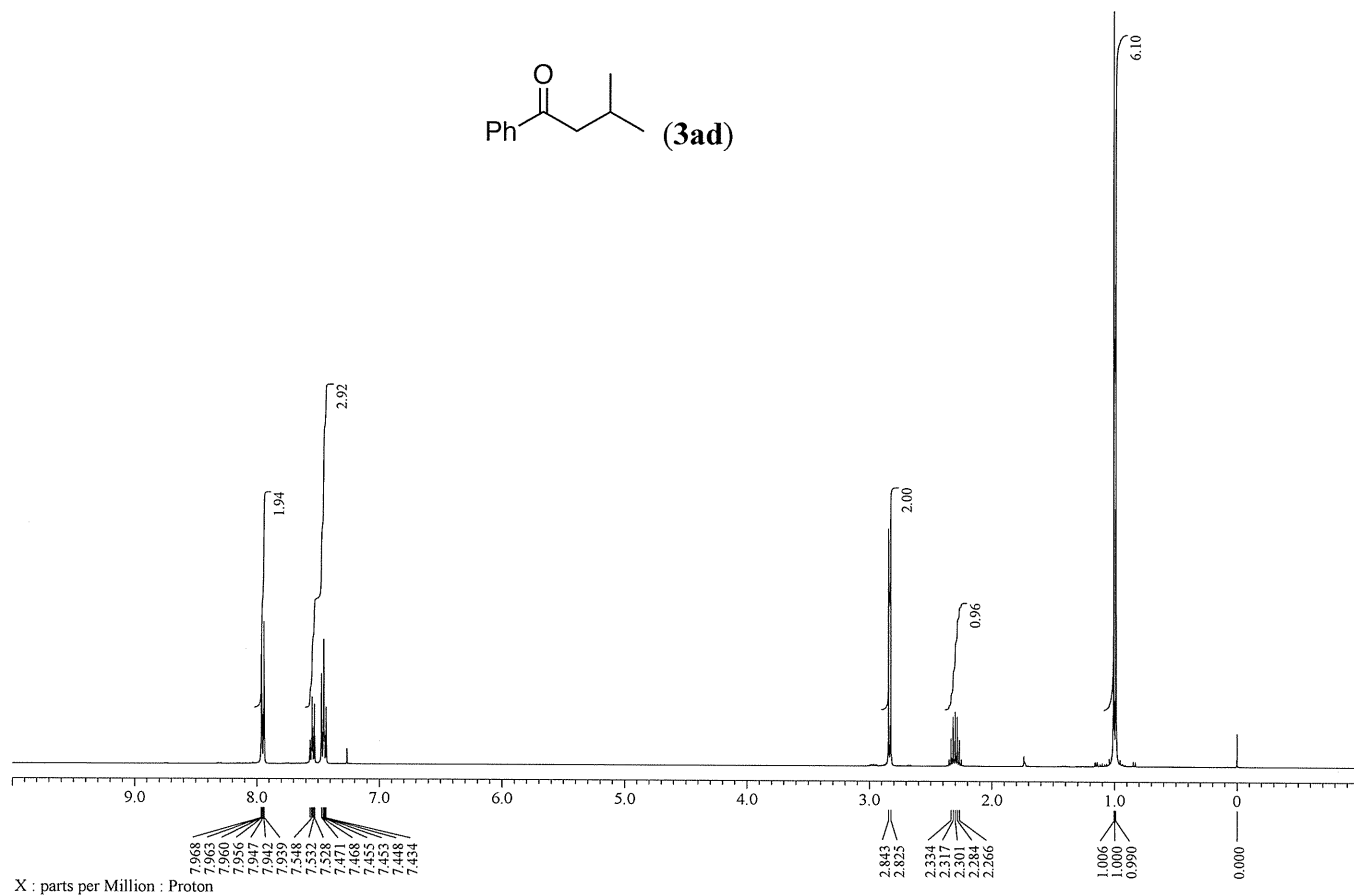

<sup>1</sup>H NMR, 400 MHz, CDCl<sub>3</sub>

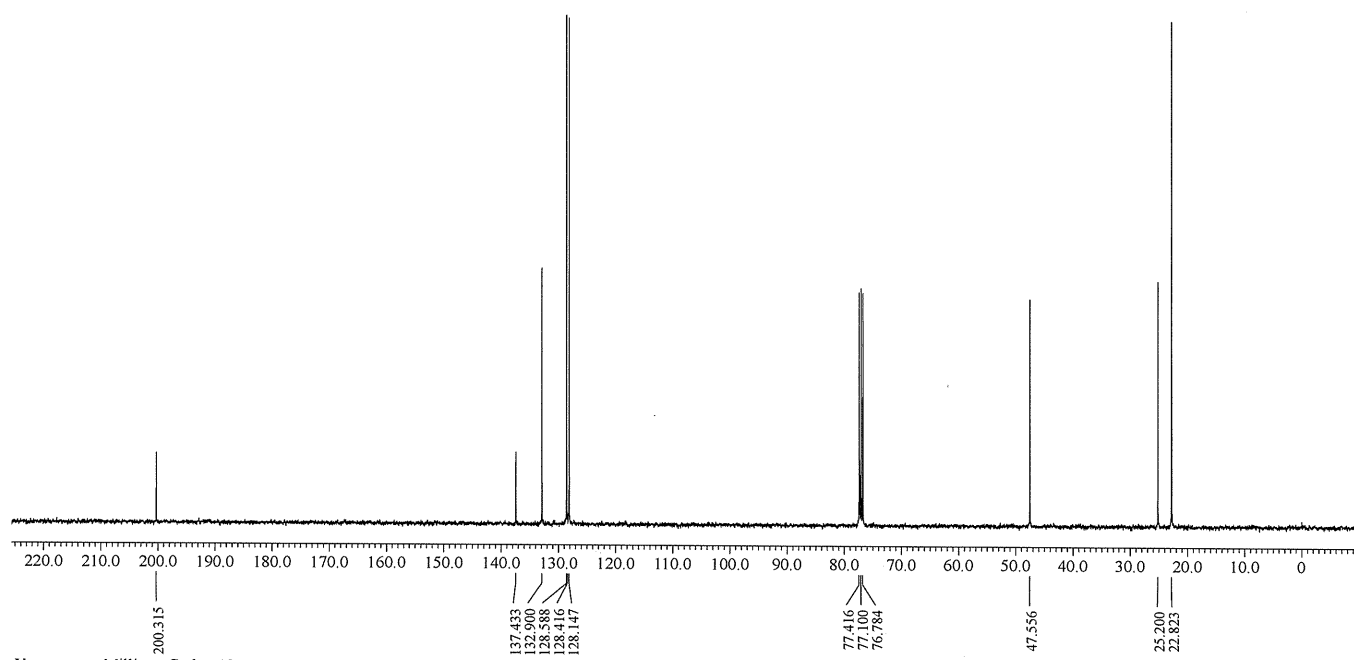

<sup>13</sup>C NMR, 100 MHz, CDCl<sub>3</sub>

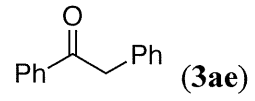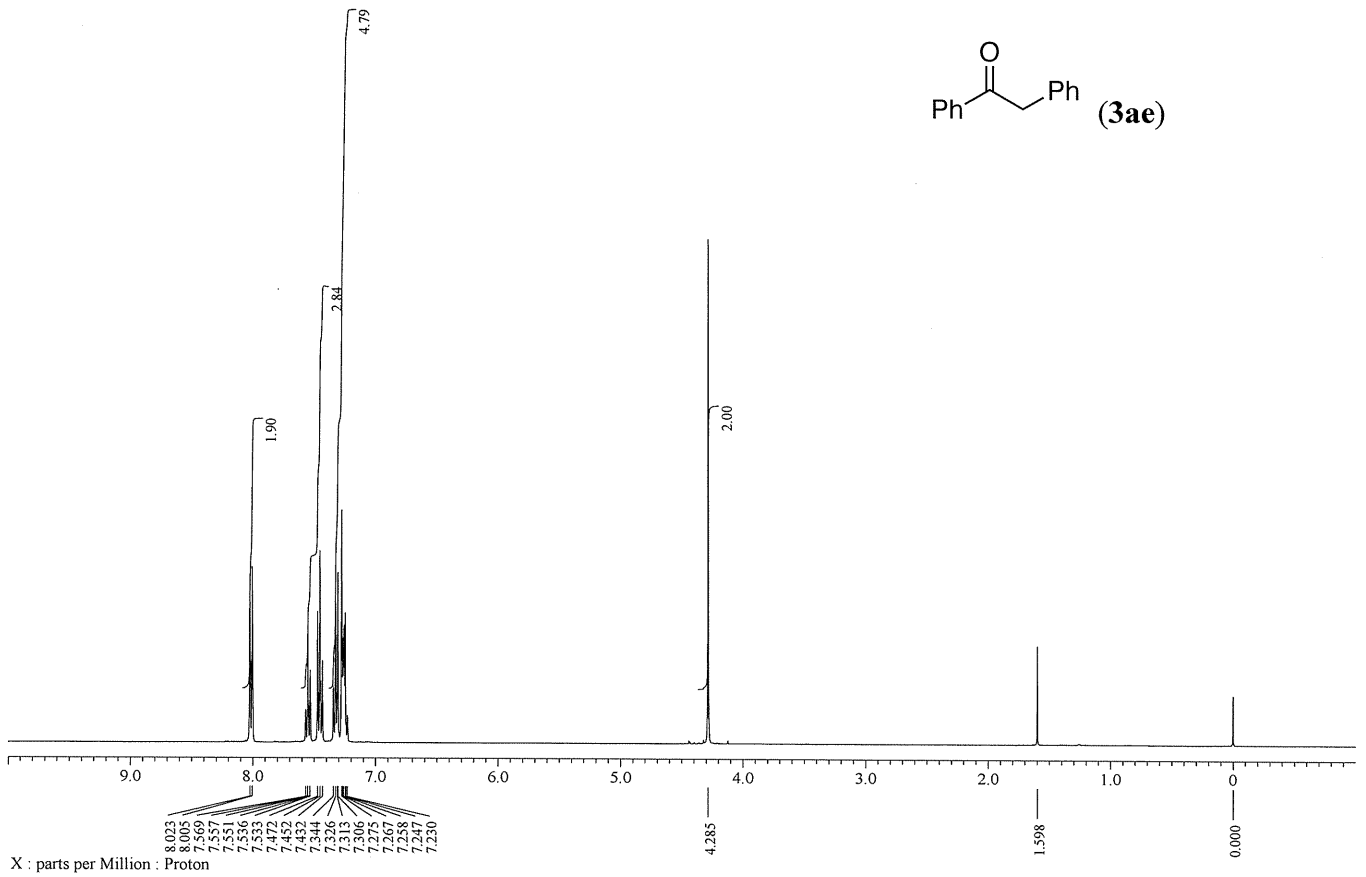

X : parts per Million : Proton

<sup>1</sup>H NMR, 400 MHz, CDCl<sub>3</sub>

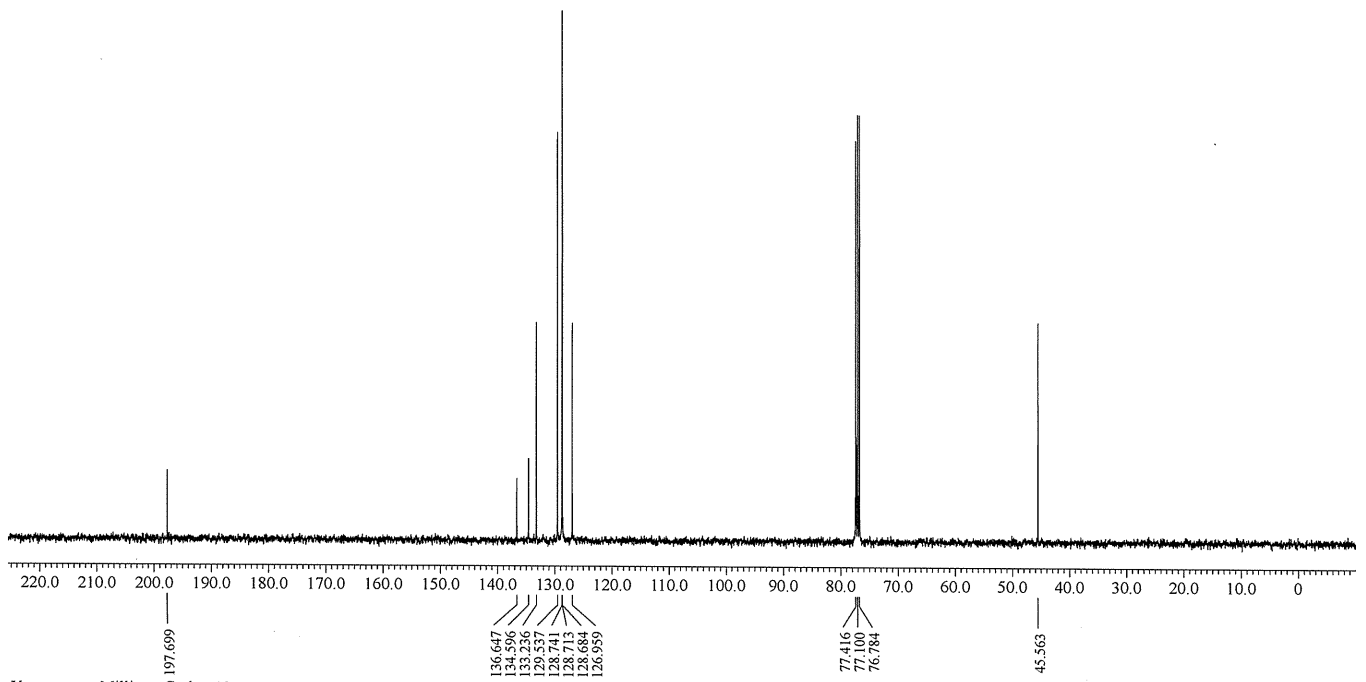

X : parts per Million : Carbon13

<sup>13</sup>C NMR, 100 MHz, CDCl<sub>3</sub>



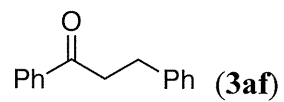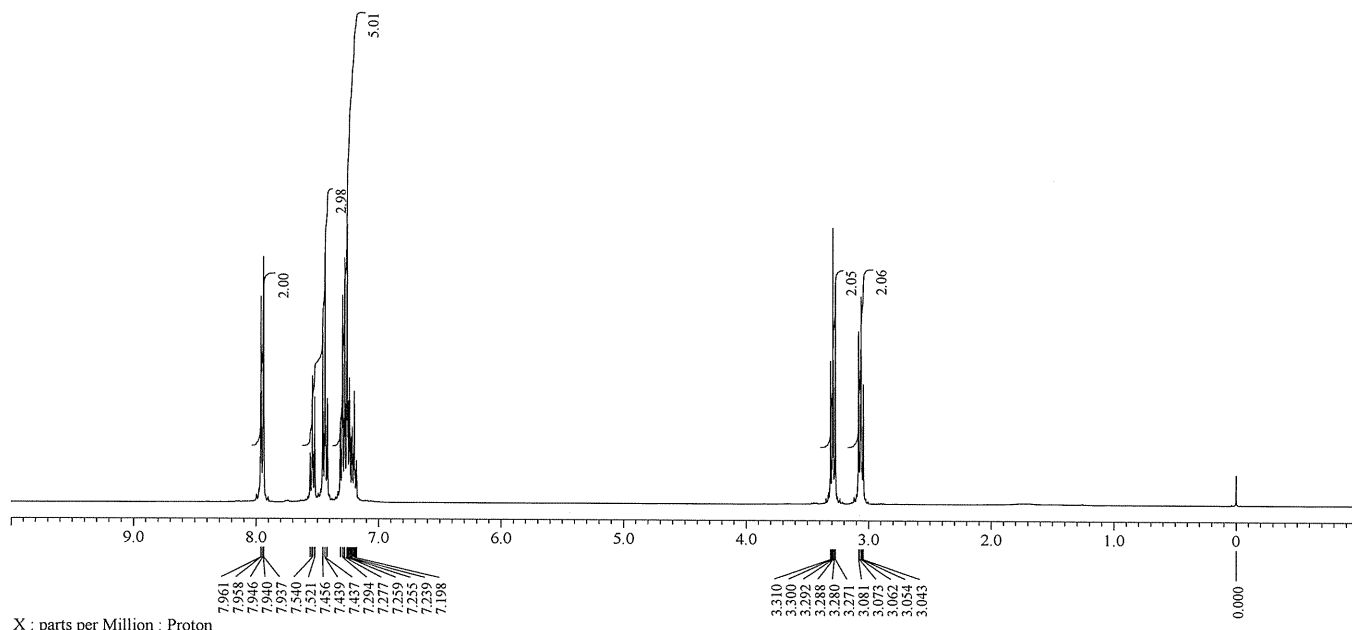

$^1\text{H}$  NMR, 400 MHz,  $\text{CDCl}_3$

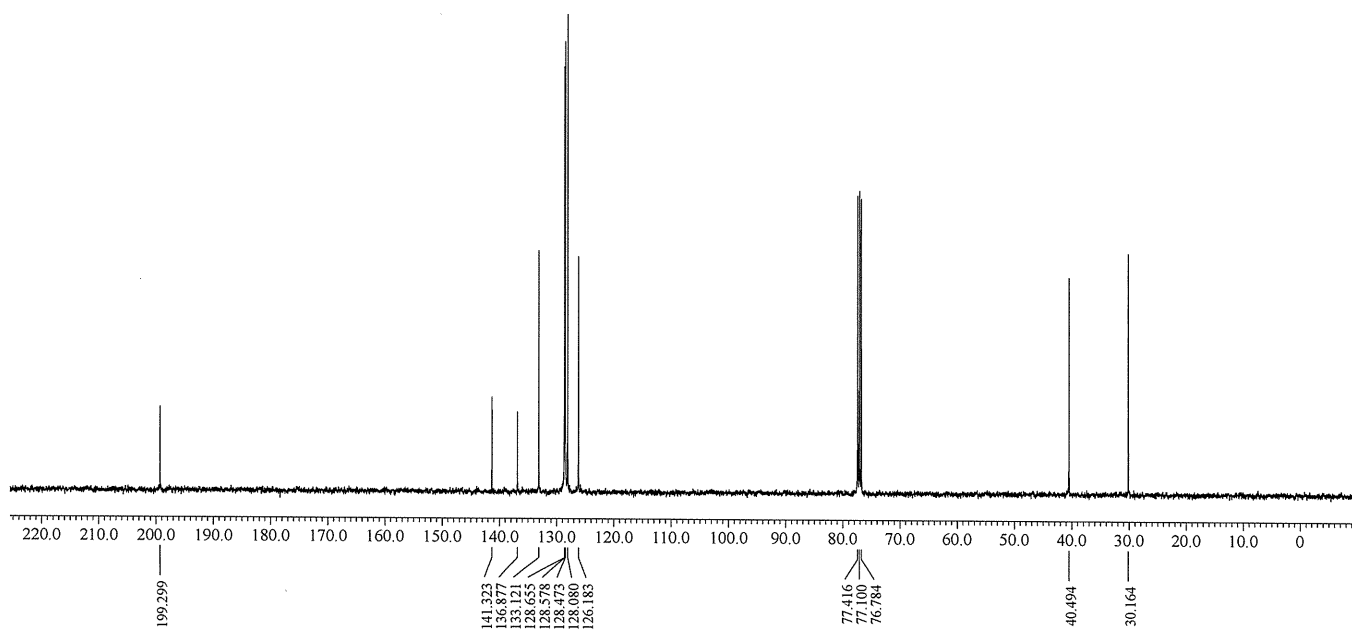

$^{13}\text{C}$  NMR, 100 MHz,  $\text{CDCl}_3$

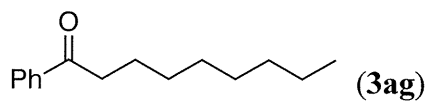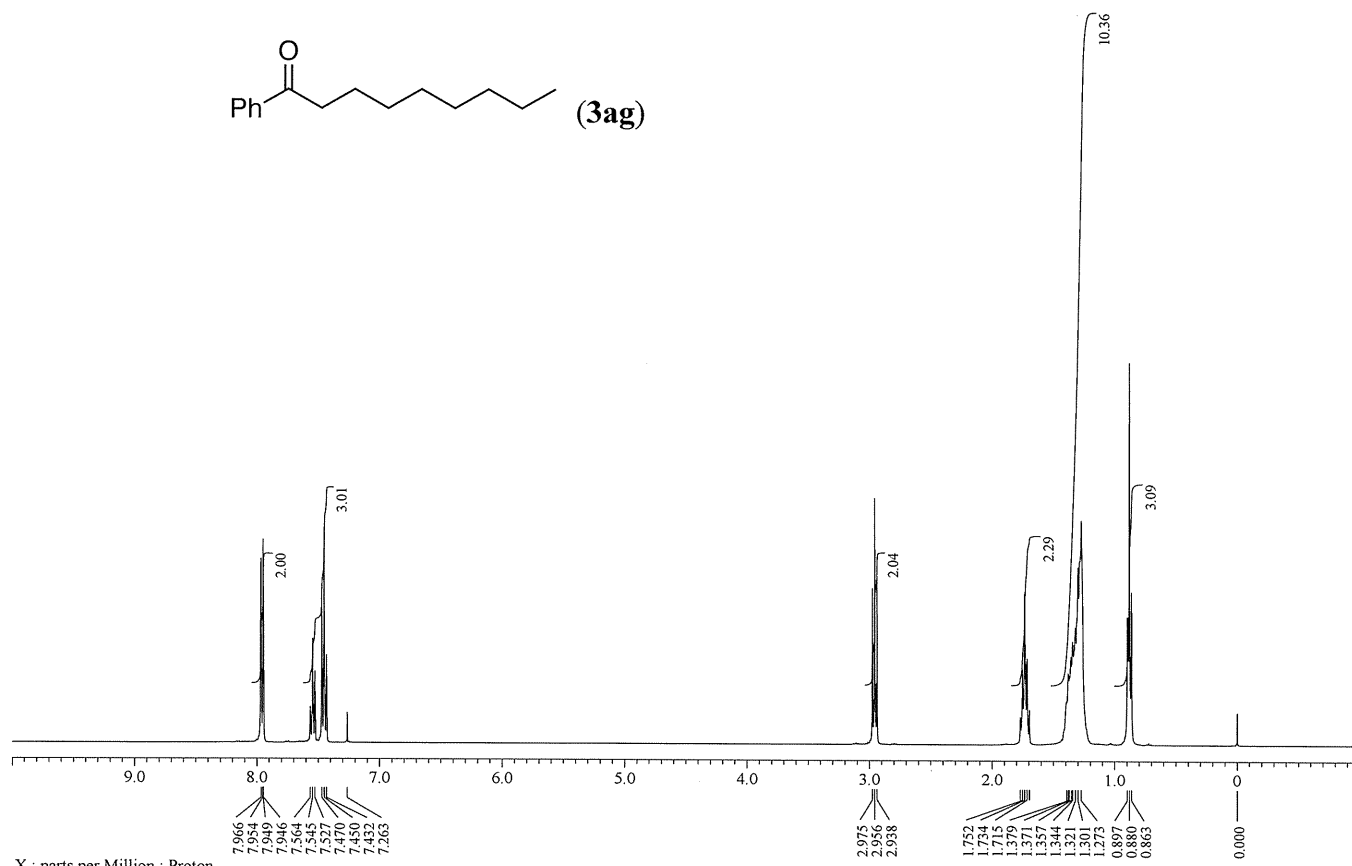

$^1\text{H}$  NMR, 400 MHz,  $\text{CDCl}_3$

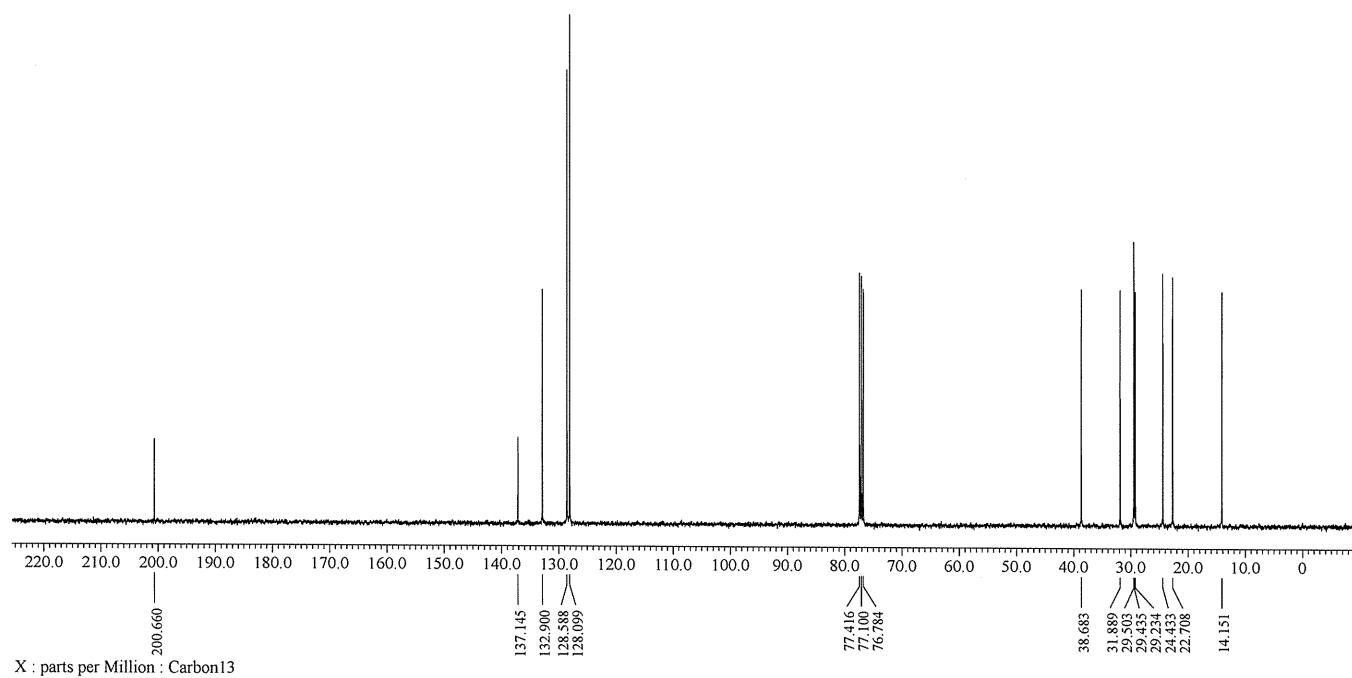

$^{13}\text{C}$  NMR, 100 MHz,  $\text{CDCl}_3$

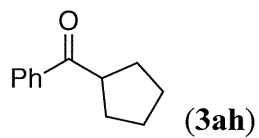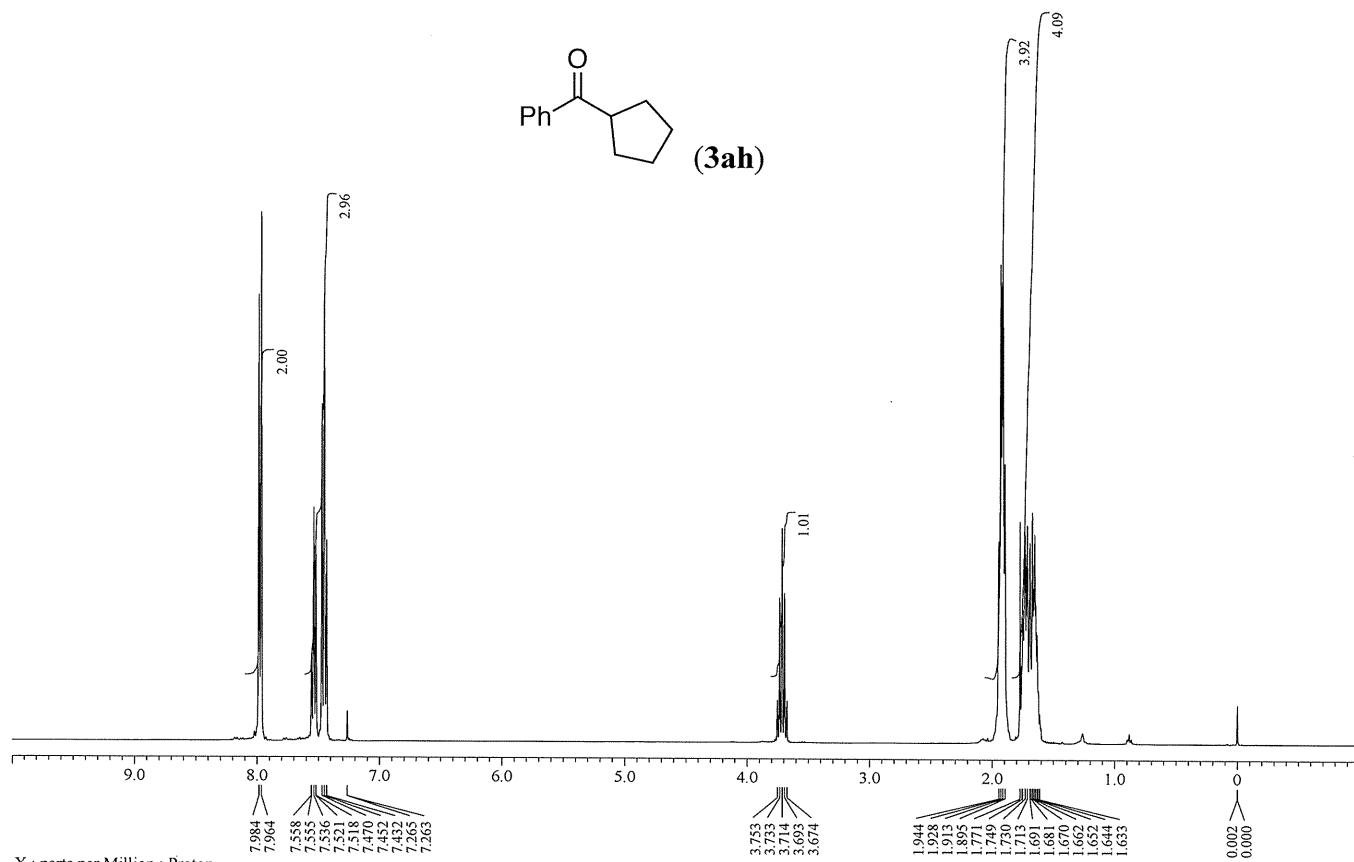

$^1\text{H}$  NMR, 400 MHz,  $\text{CDCl}_3$

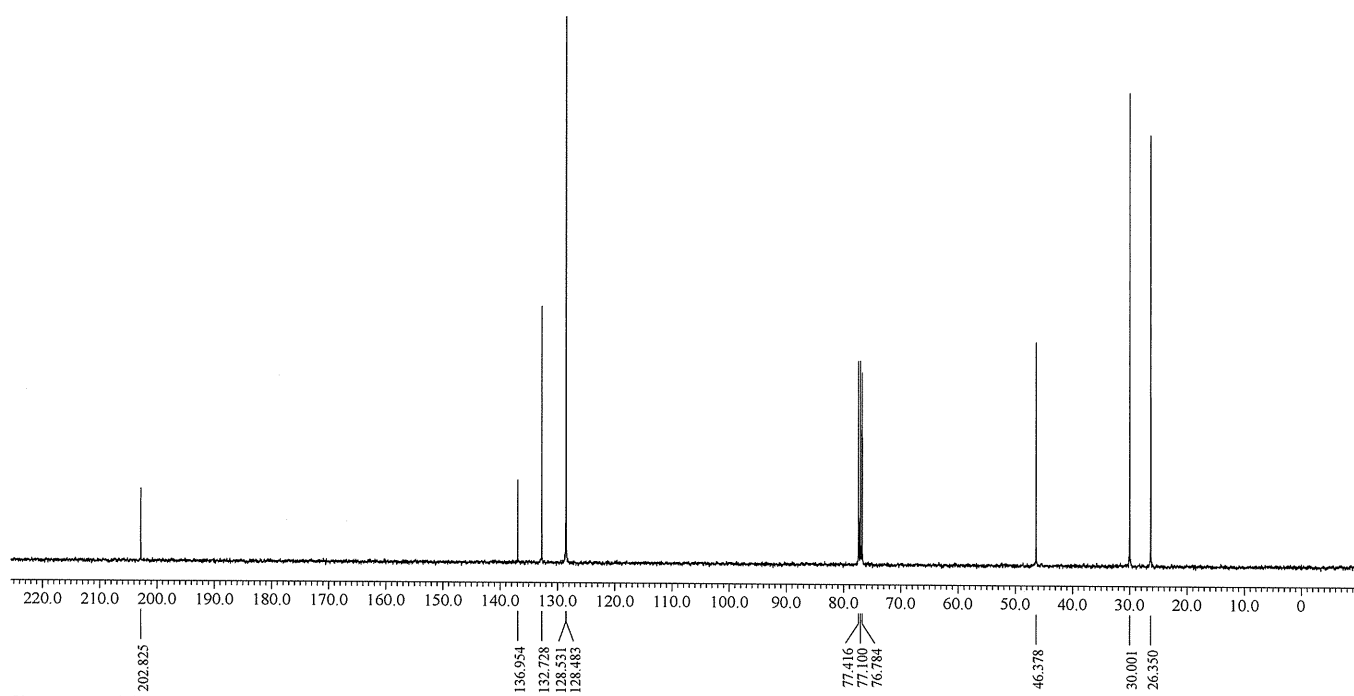

$^{13}\text{C}$  NMR, 100 MHz,  $\text{CDCl}_3$

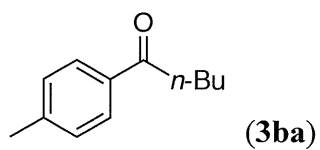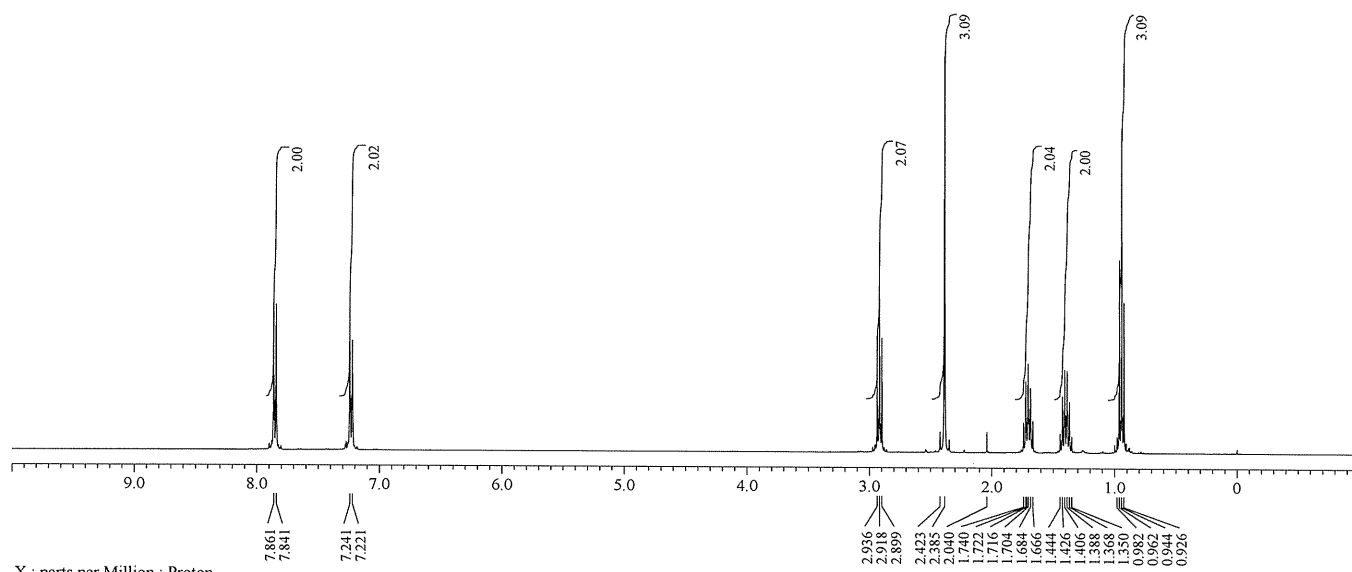

<sup>1</sup>H NMR, 400 MHz, CDCl<sub>3</sub>

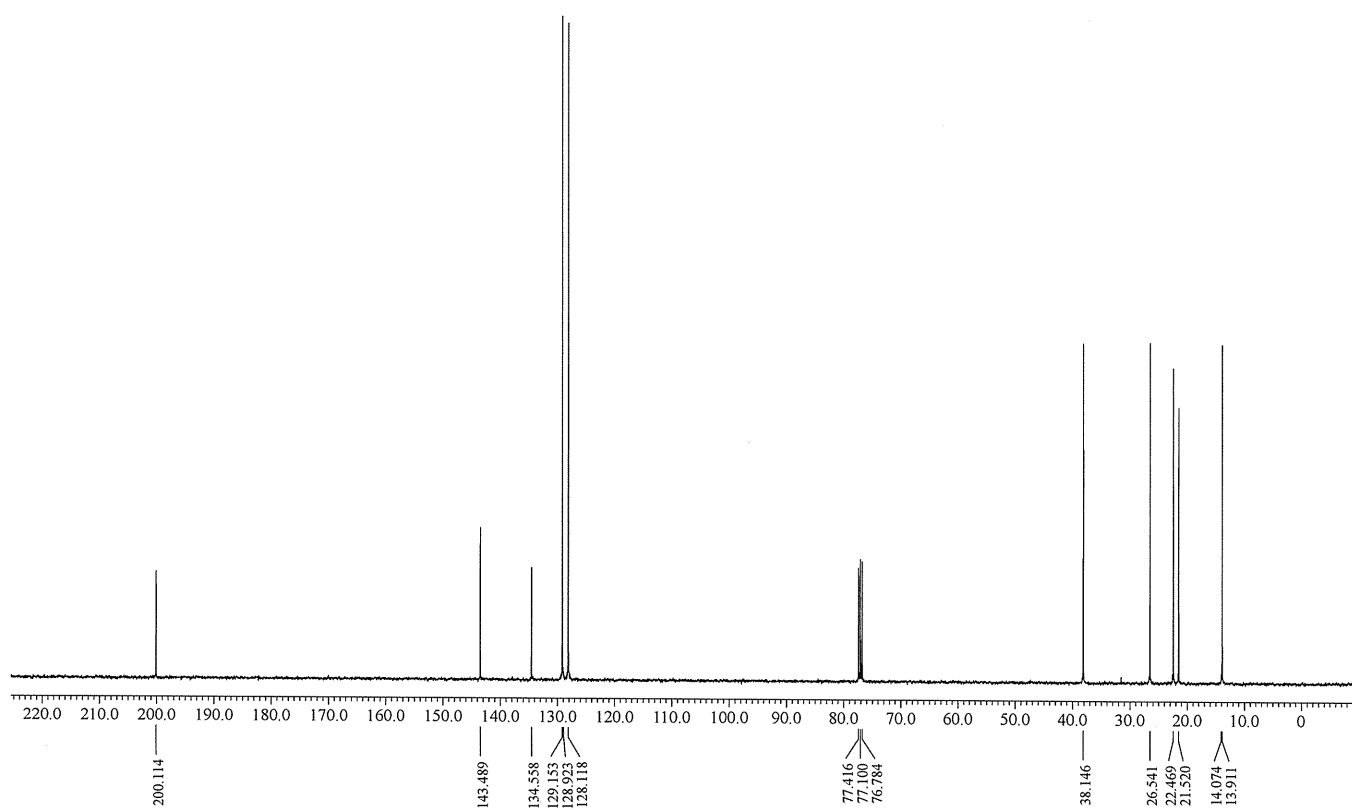

<sup>13</sup>C NMR, 100 MHz, CDCl<sub>3</sub>

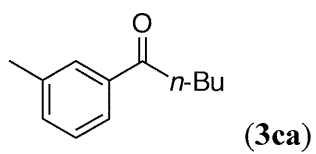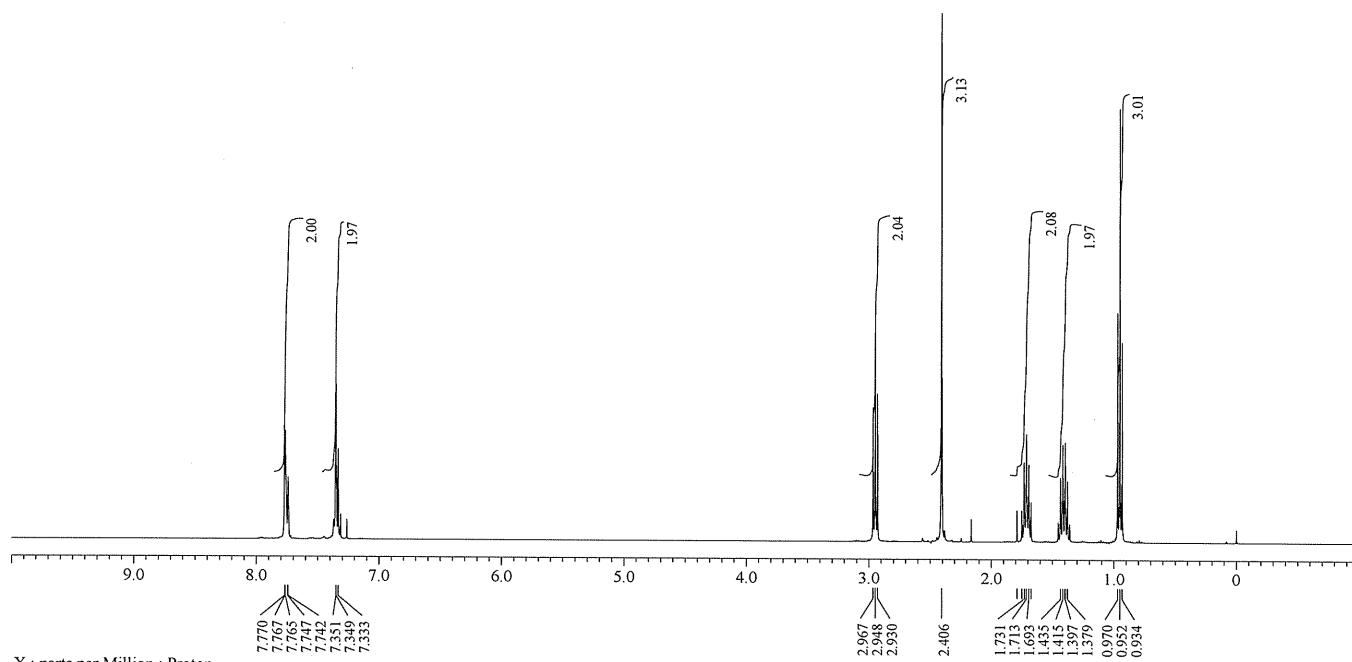

<sup>1</sup>H NMR, 400 MHz, CDCl<sub>3</sub>

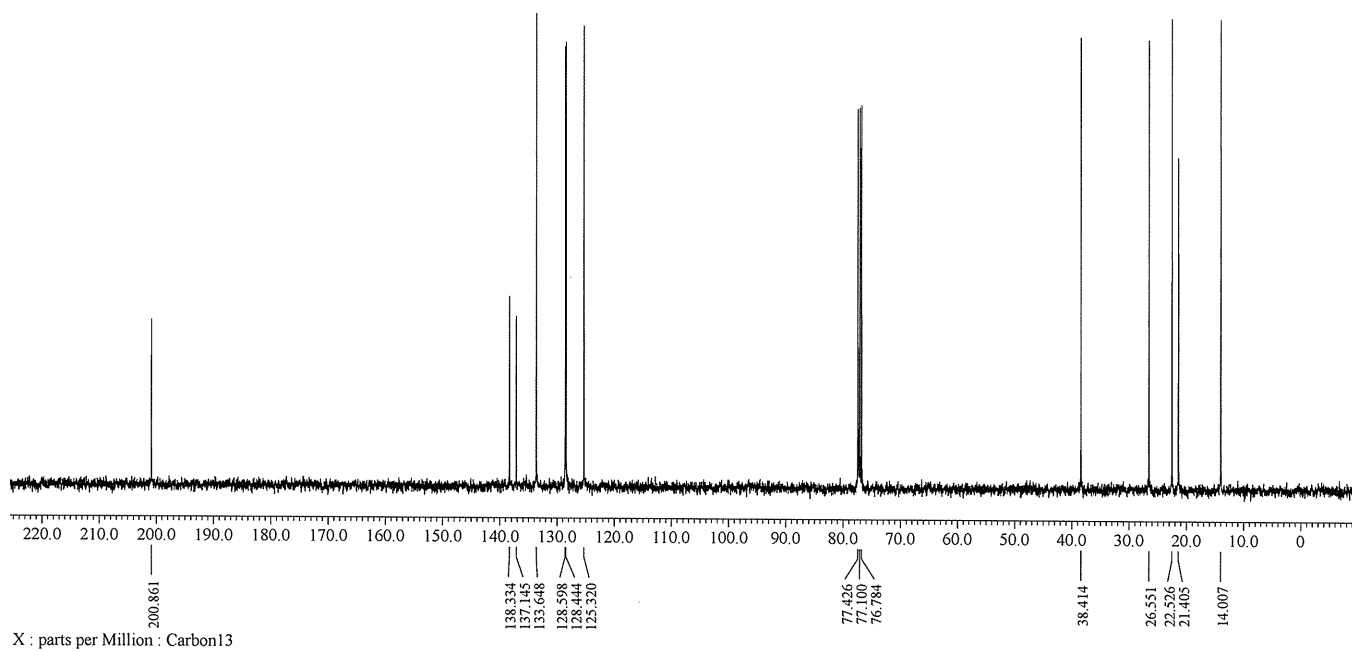

<sup>13</sup>C NMR, 100 MHz, CDCl<sub>3</sub>

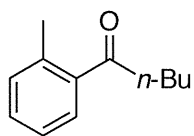

(3da)

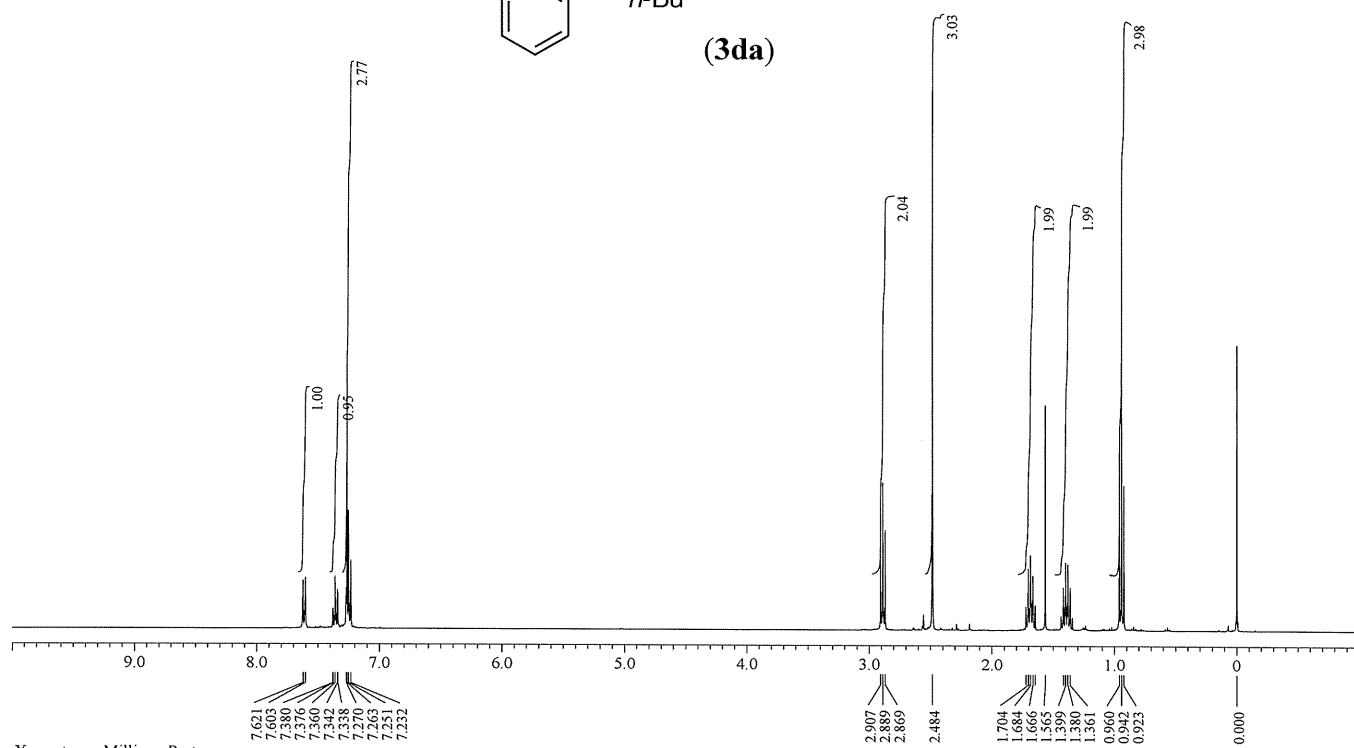

X : parts per Million : Proton

<sup>1</sup>H NMR, 400 MHz, CDCl<sub>3</sub>

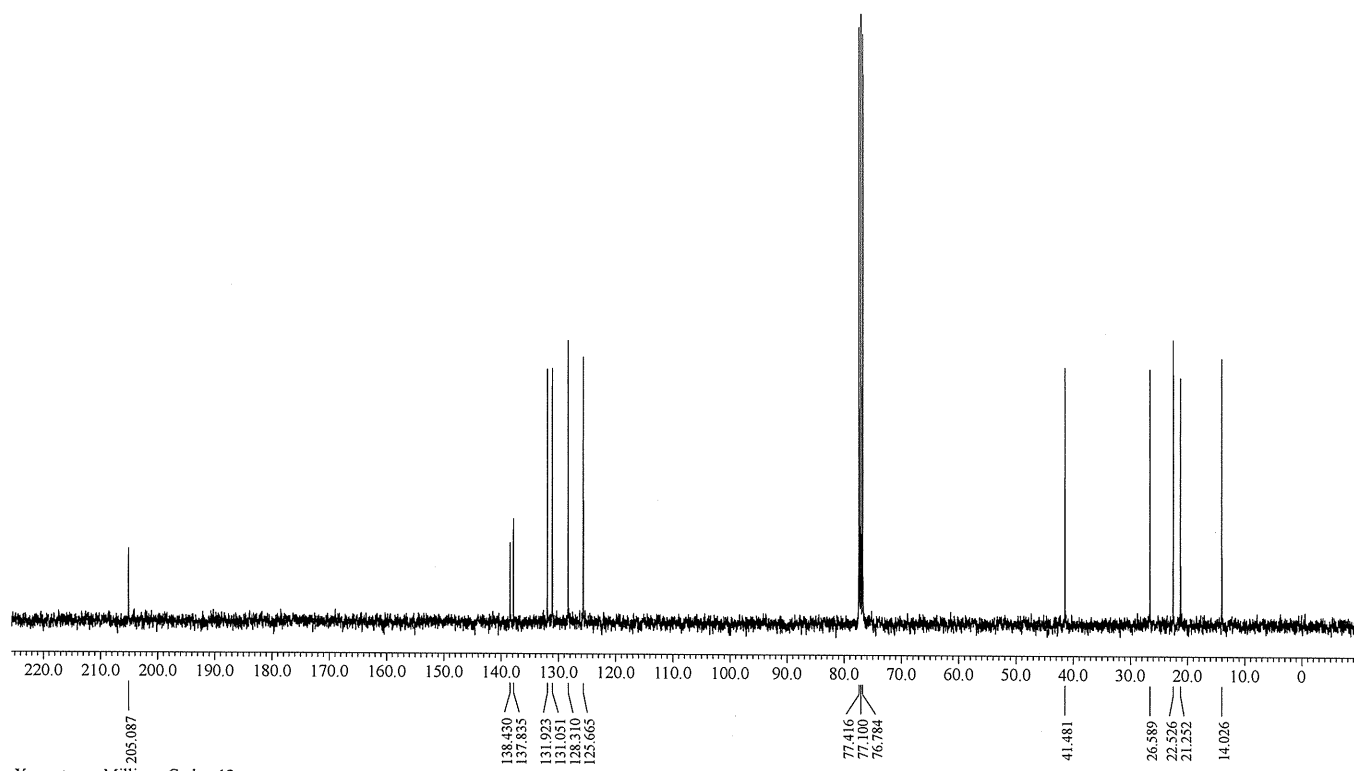

X : parts per Million : Carbon13

<sup>13</sup>C NMR, 100 MHz, CDCl<sub>3</sub>

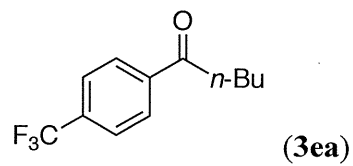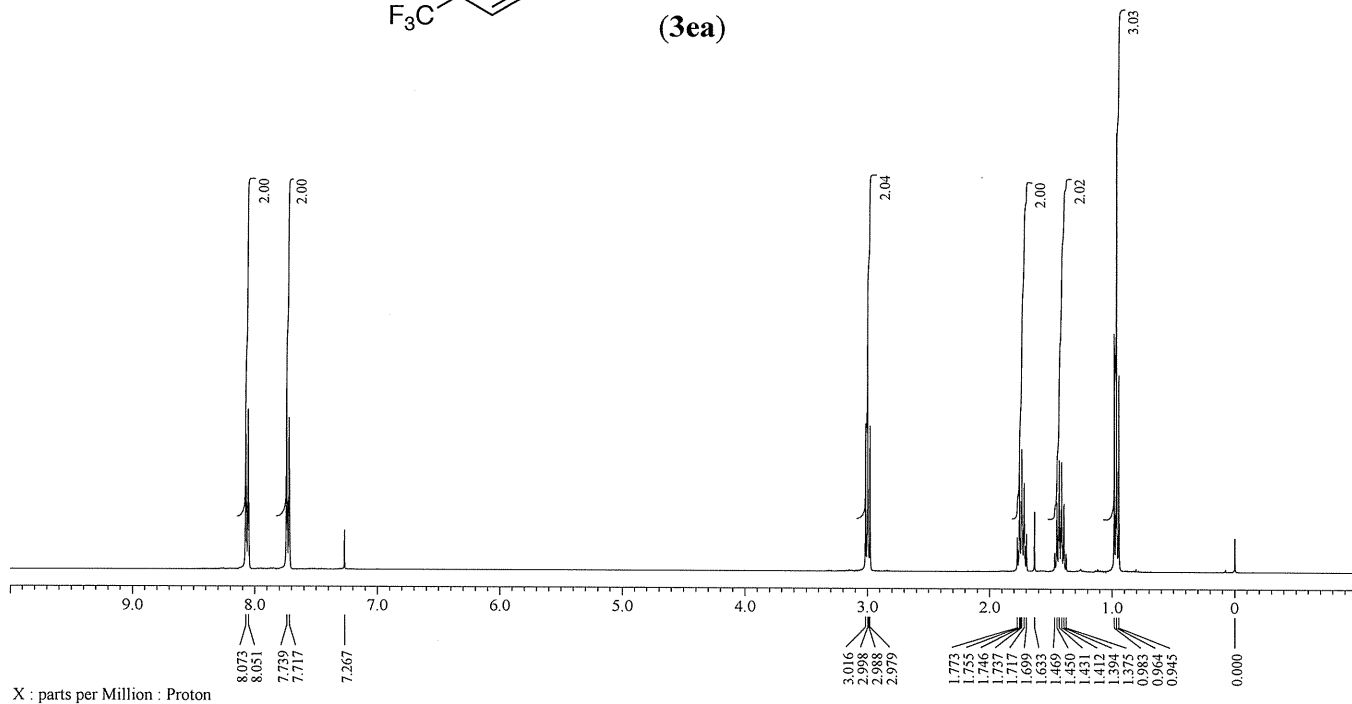

<sup>1</sup>H NMR, 400 MHz, CDCl<sub>3</sub>

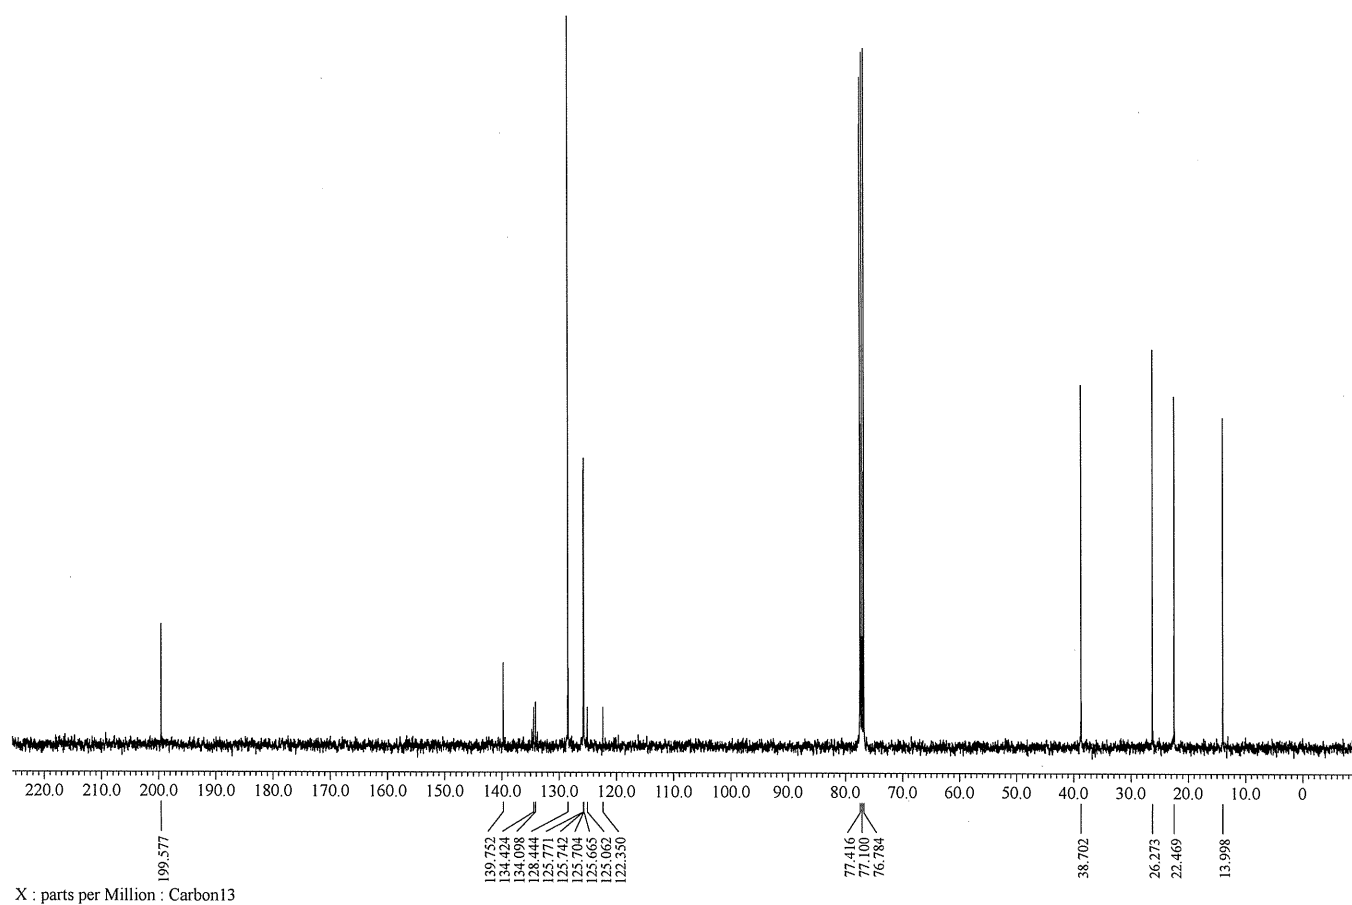

<sup>13</sup>C NMR, 100 MHz, CDCl<sub>3</sub>

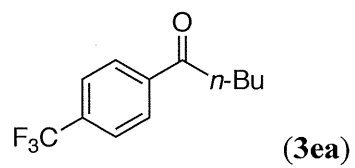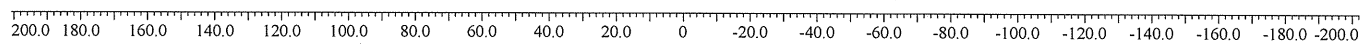

X : parts per Million : Fluorine19

$^{19}\text{F}$  NMR, 376 MHz,  $\text{CDCl}_3$



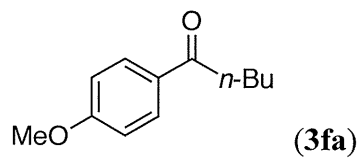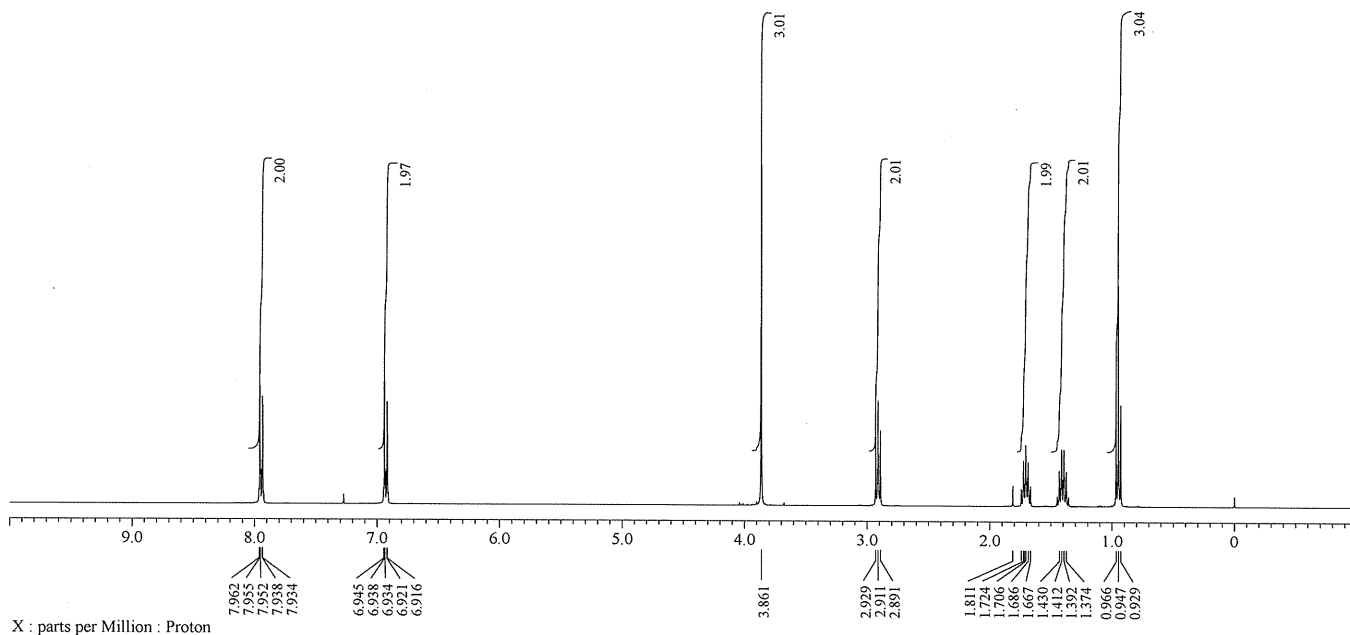

$^1\text{H}$  NMR, 400 MHz,  $\text{CDCl}_3$

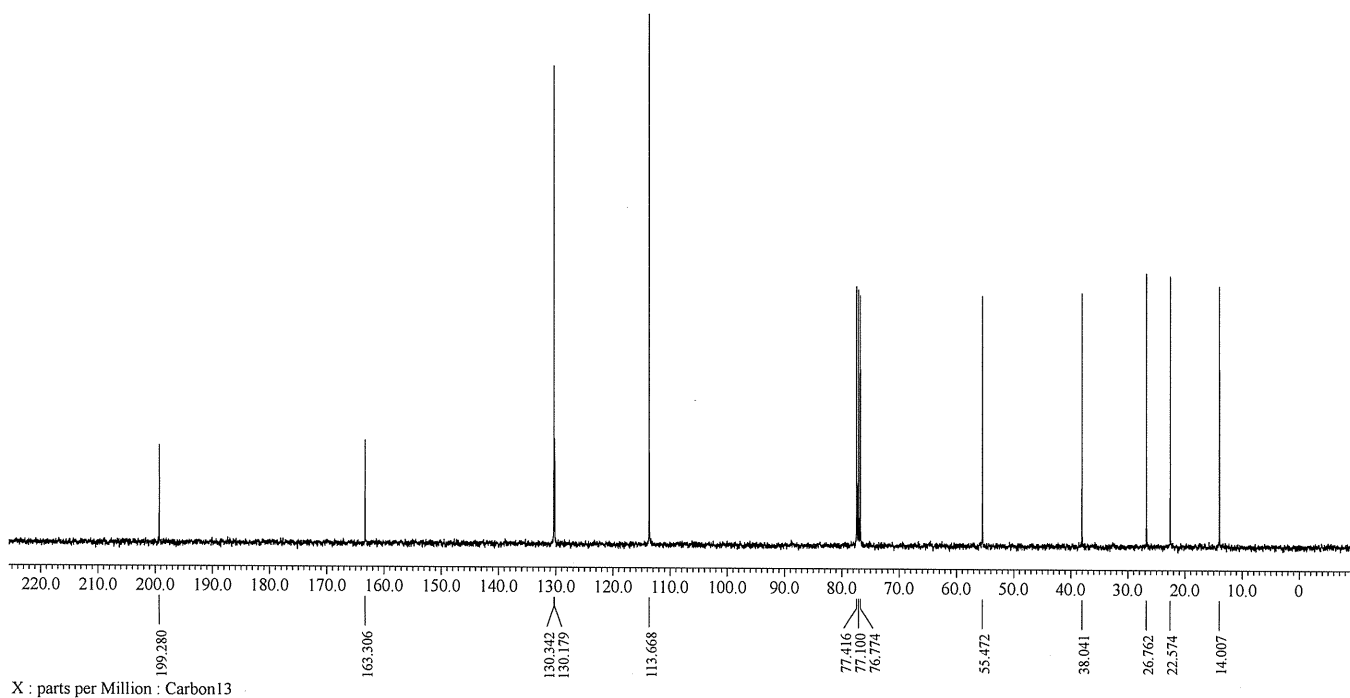

$^{13}\text{C}$  NMR, 100 MHz,  $\text{CDCl}_3$

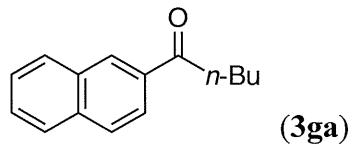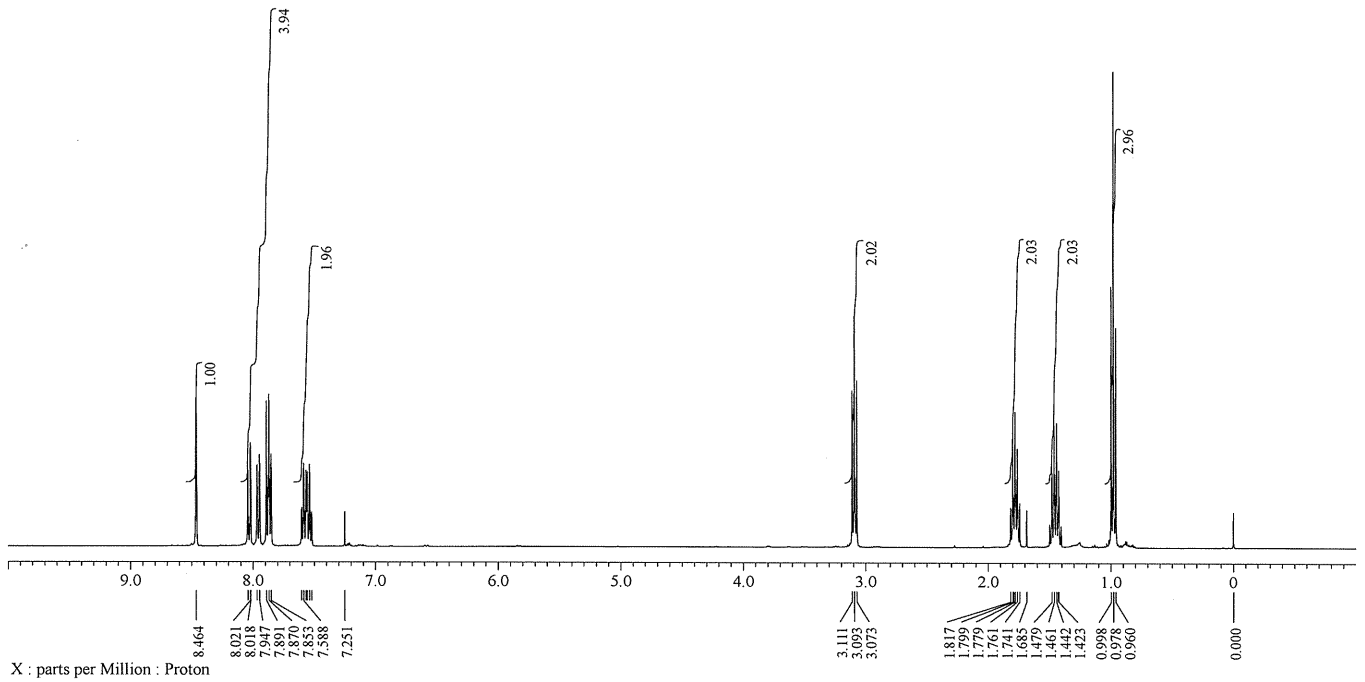

<sup>1</sup>H NMR, 400 MHz, CDCl<sub>3</sub>

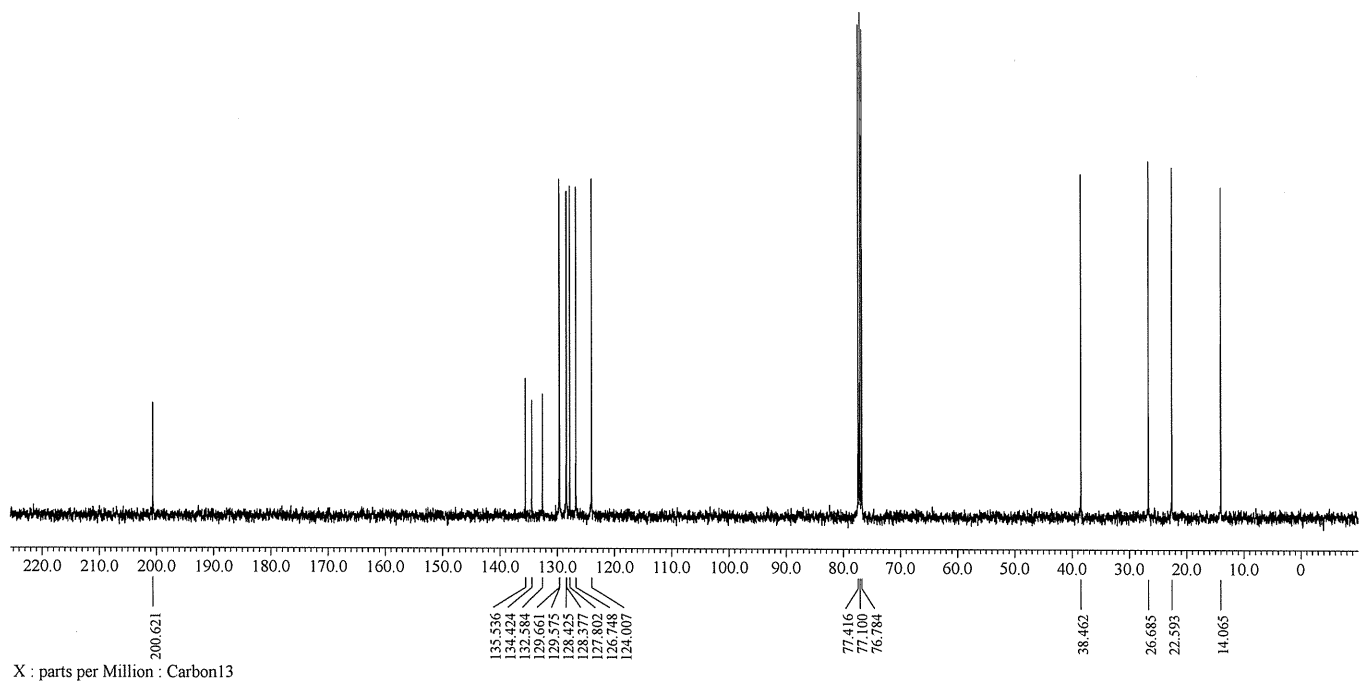

<sup>13</sup>C NMR, 100 MHz, CDCl<sub>3</sub>

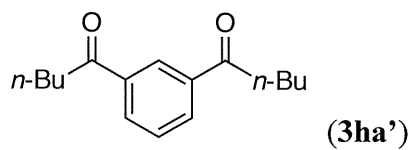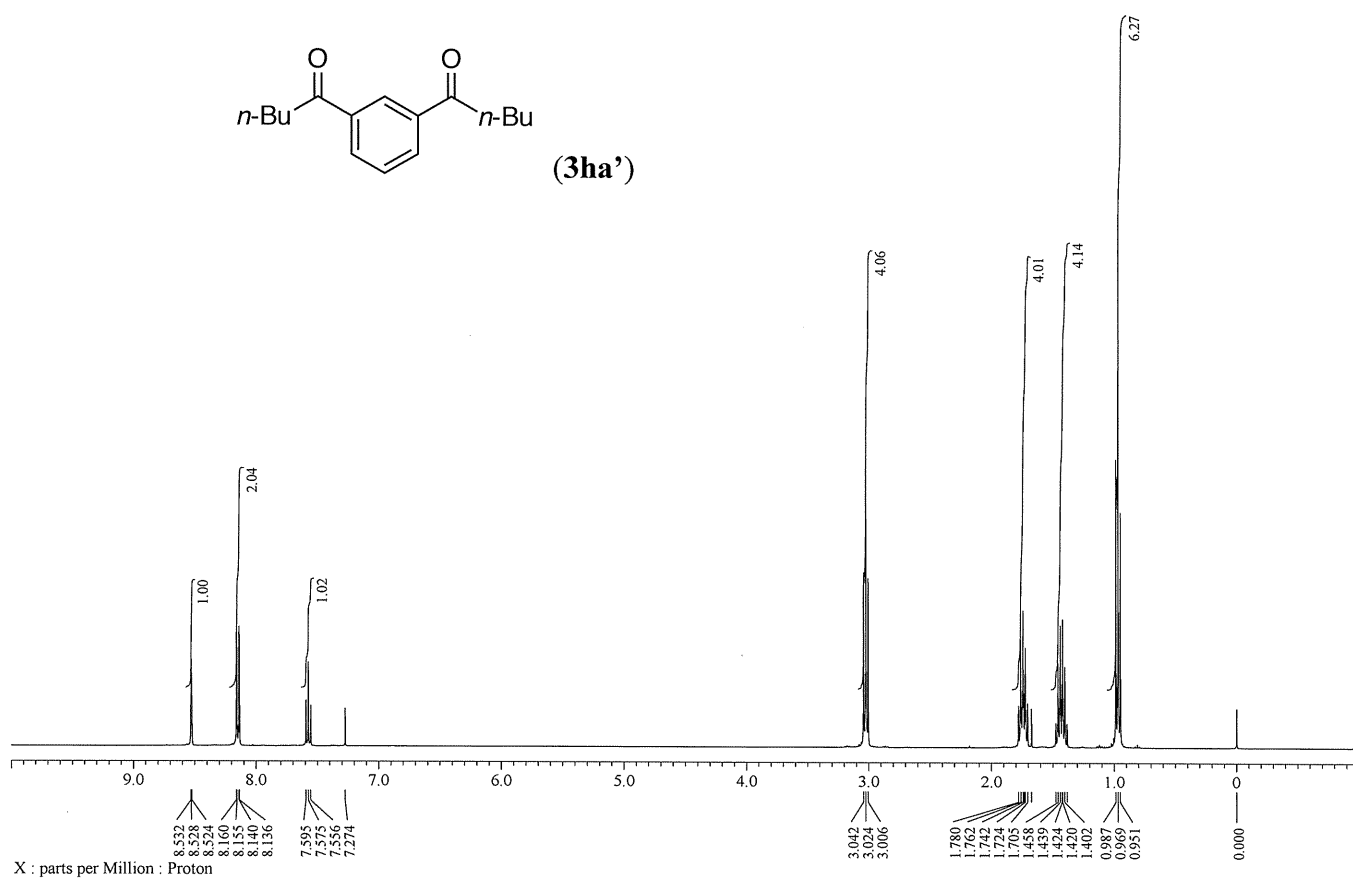

$^1\text{H}$  NMR, 400 MHz,  $\text{CDCl}_3$

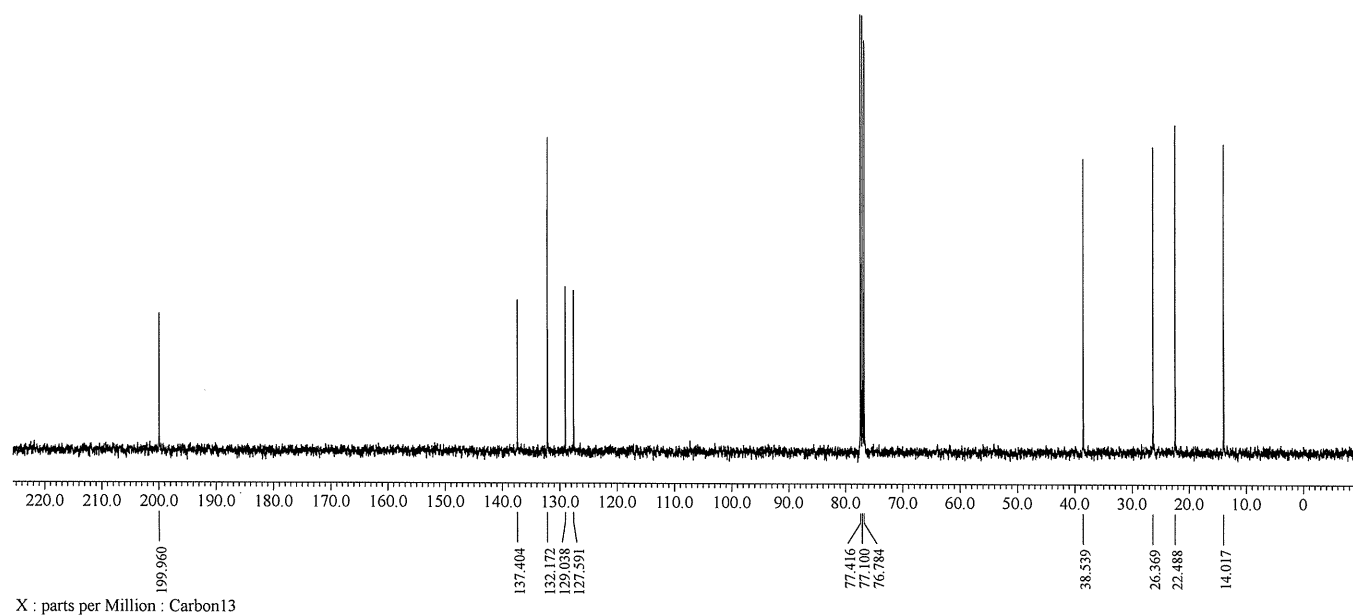

X : parts per Million : Carbon13

$^{13}\text{C}$  NMR, 100 MHz,  $\text{CDCl}_3$

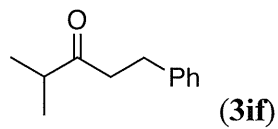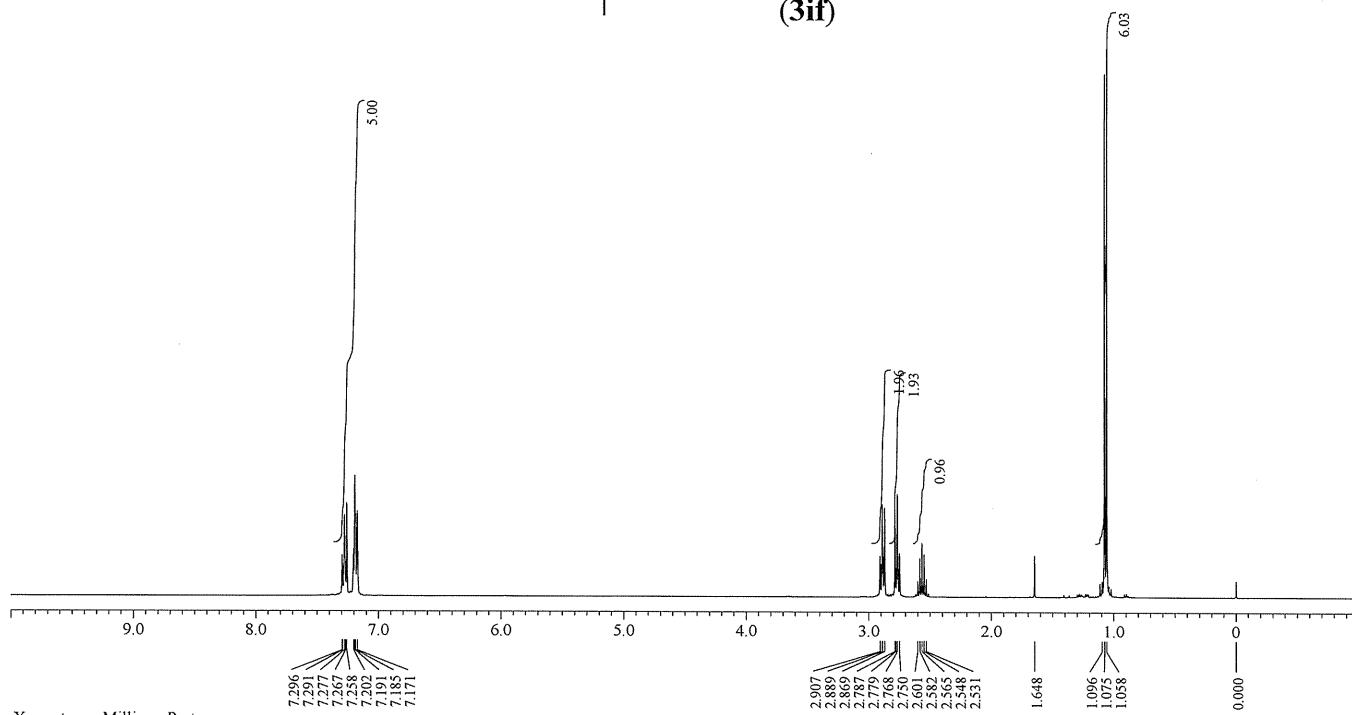

X : parts per Million : Proton

<sup>1</sup>H NMR, 400 MHz, CDCl<sub>3</sub>

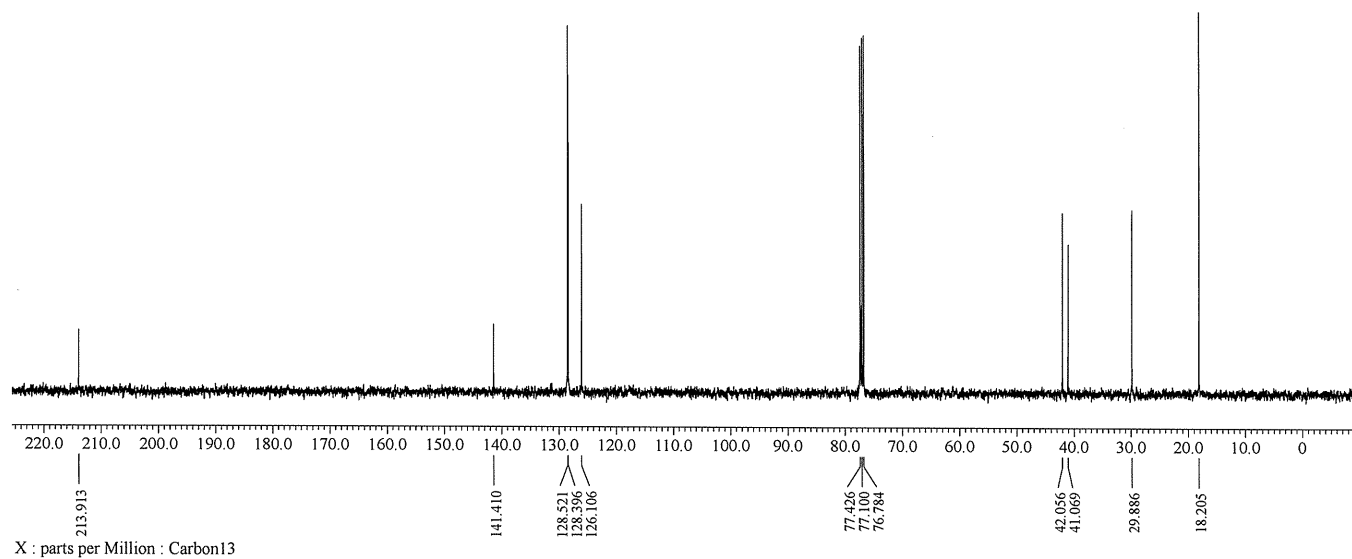

X : parts per Million : Carbon13

<sup>13</sup>C NMR, 100 MHz, CDCl<sub>3</sub>

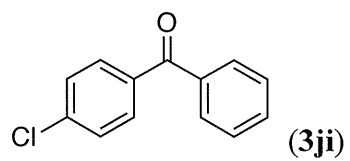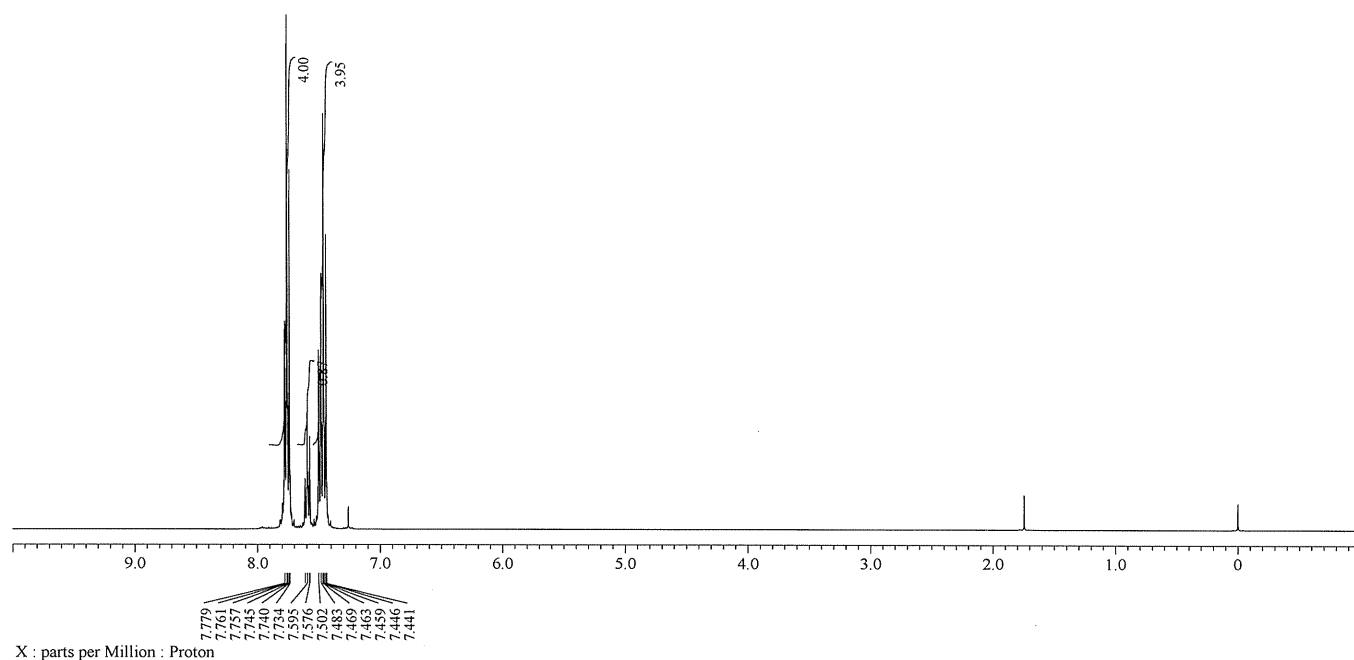

X : parts per Million : Proton

<sup>1</sup>H NMR, 400 MHz, CDCl<sub>3</sub>

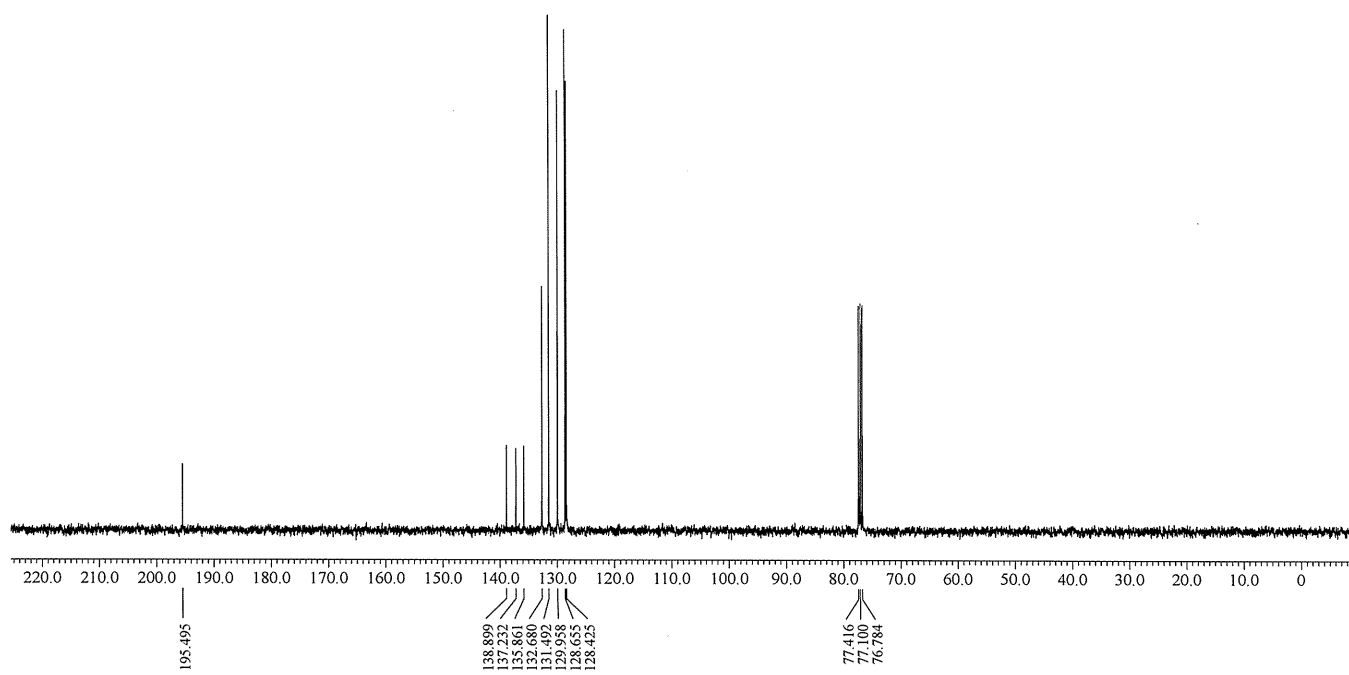

X : parts per Million : Carbon13

<sup>13</sup>C NMR, 100 MHz, CDCl<sub>3</sub>

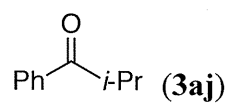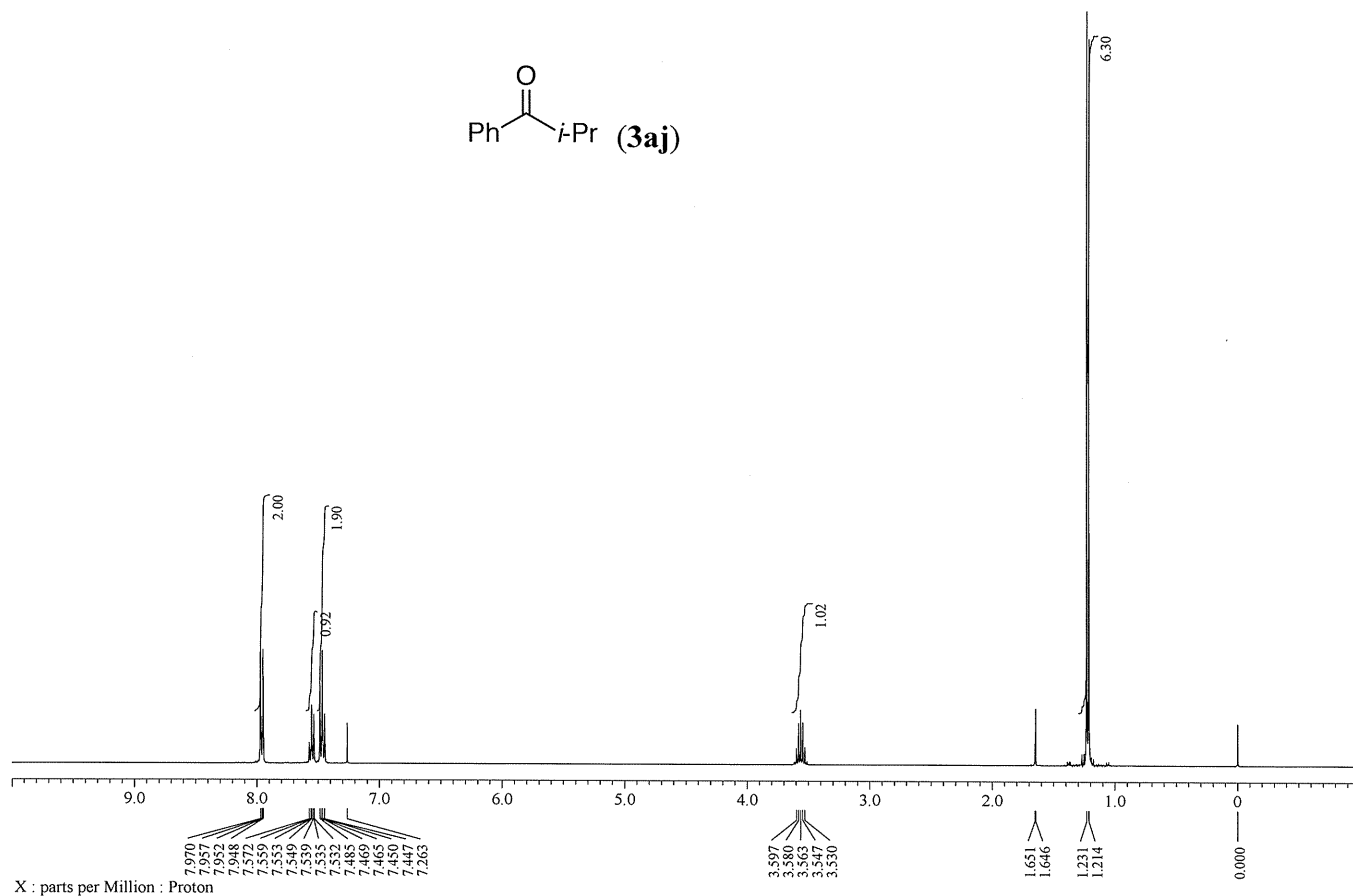

$^1\text{H}$  NMR, 400 MHz,  $\text{CDCl}_3$

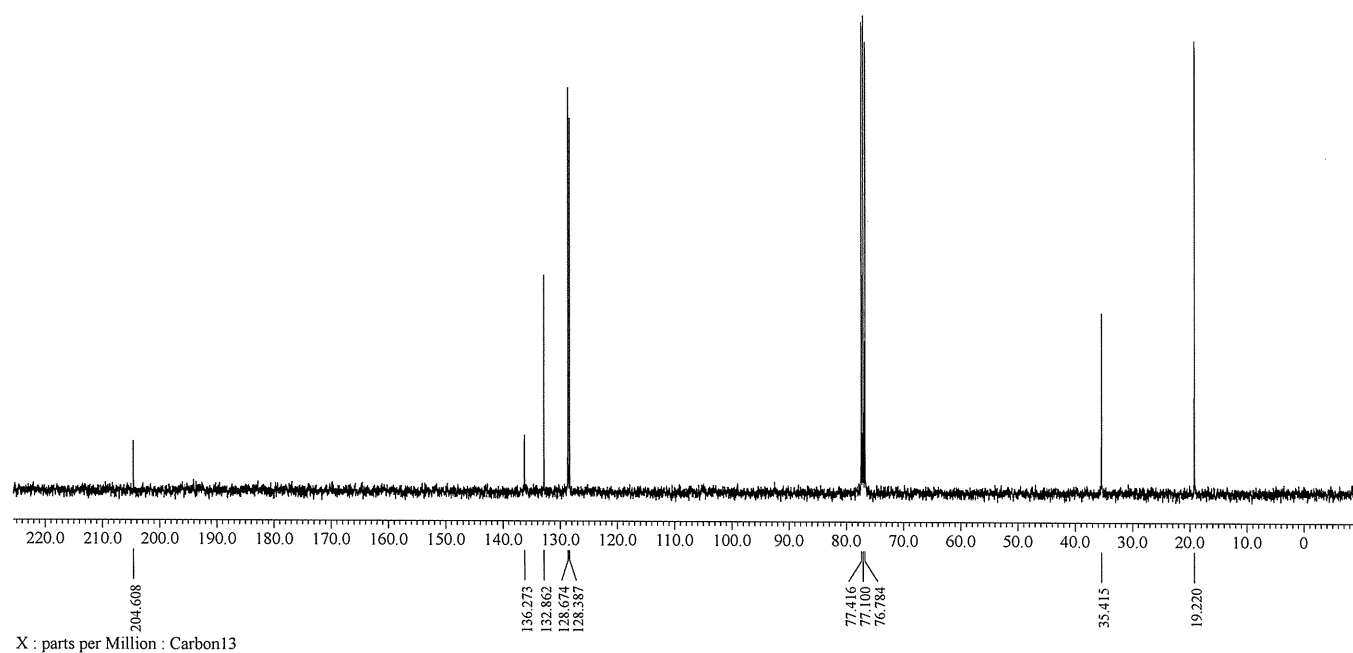

$^{13}\text{C}$  NMR, 100 MHz,  $\text{CDCl}_3$

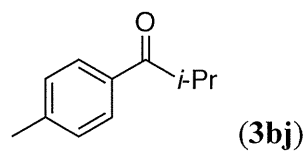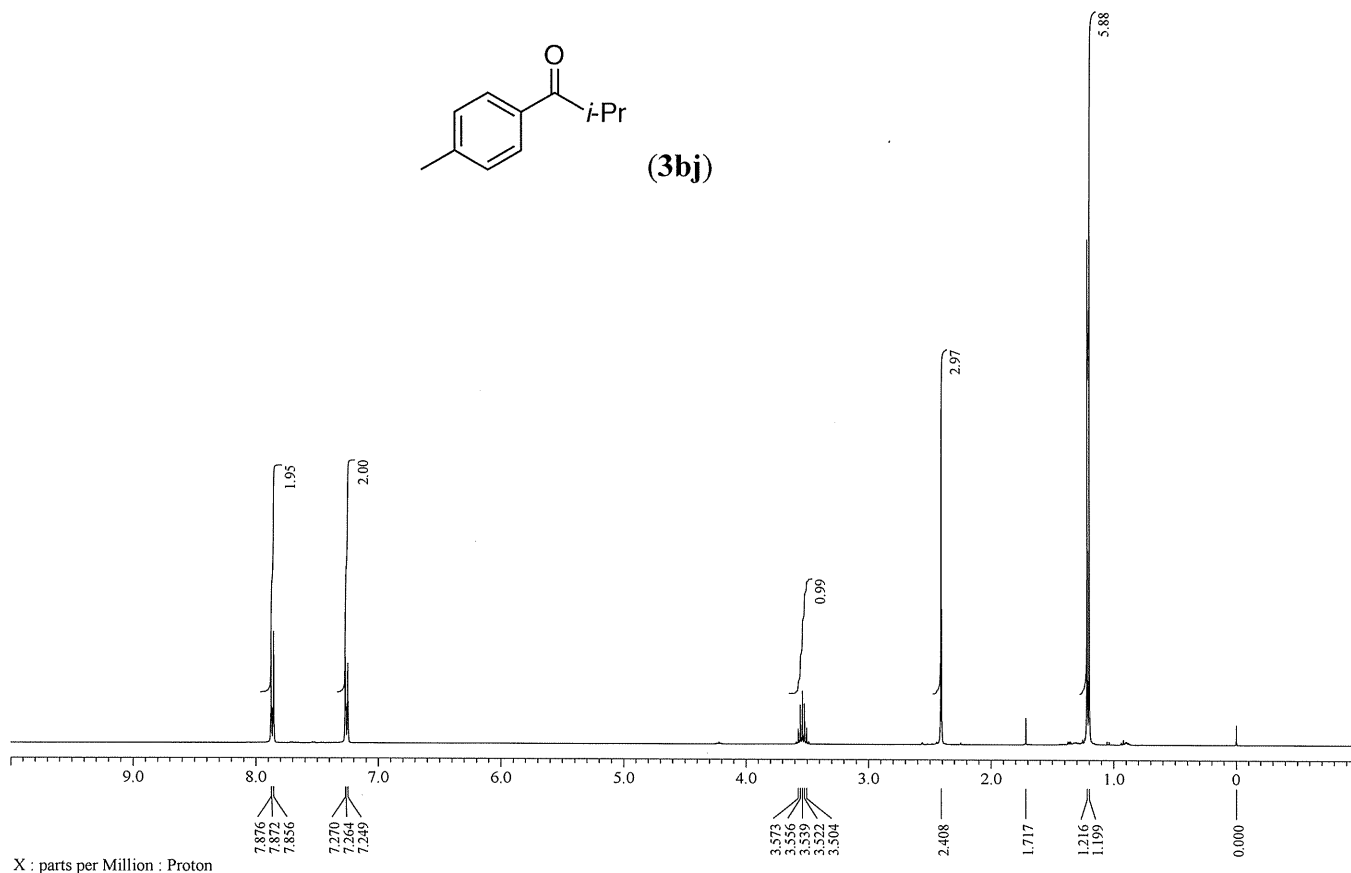

X : parts per Million : Proton

<sup>1</sup>H NMR, 400 MHz, CDCl<sub>3</sub>

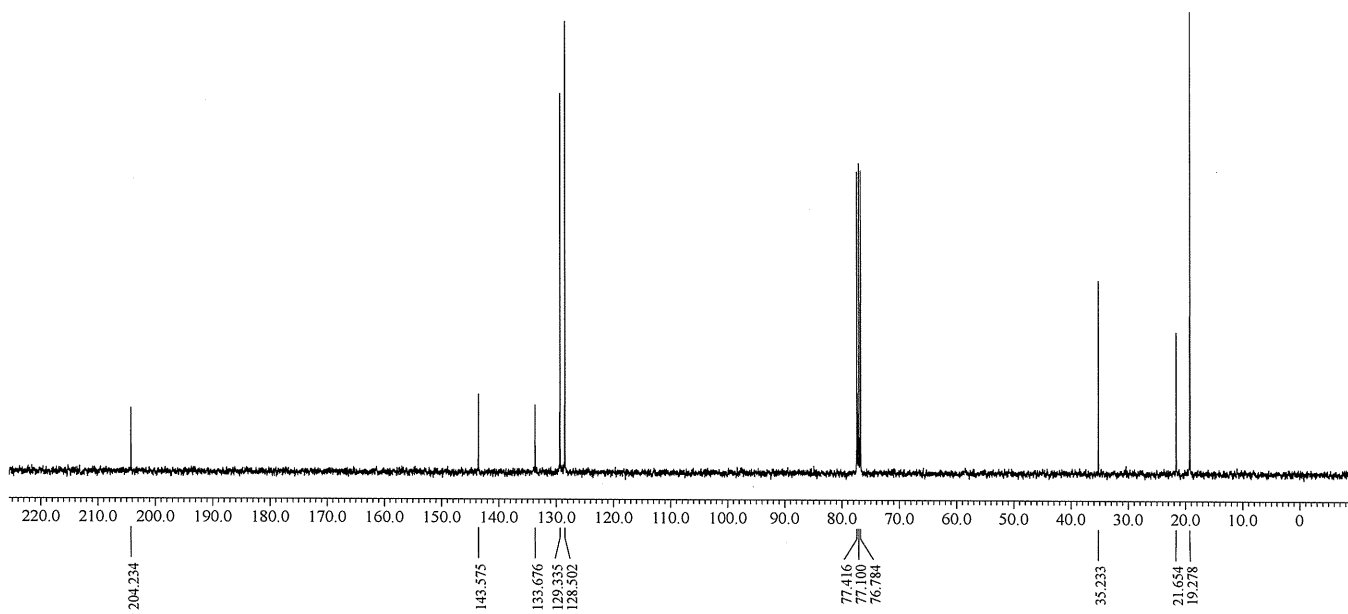

X : parts per Million : Carbon13

<sup>13</sup>C NMR, 100 MHz, CDCl<sub>3</sub>

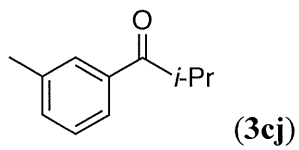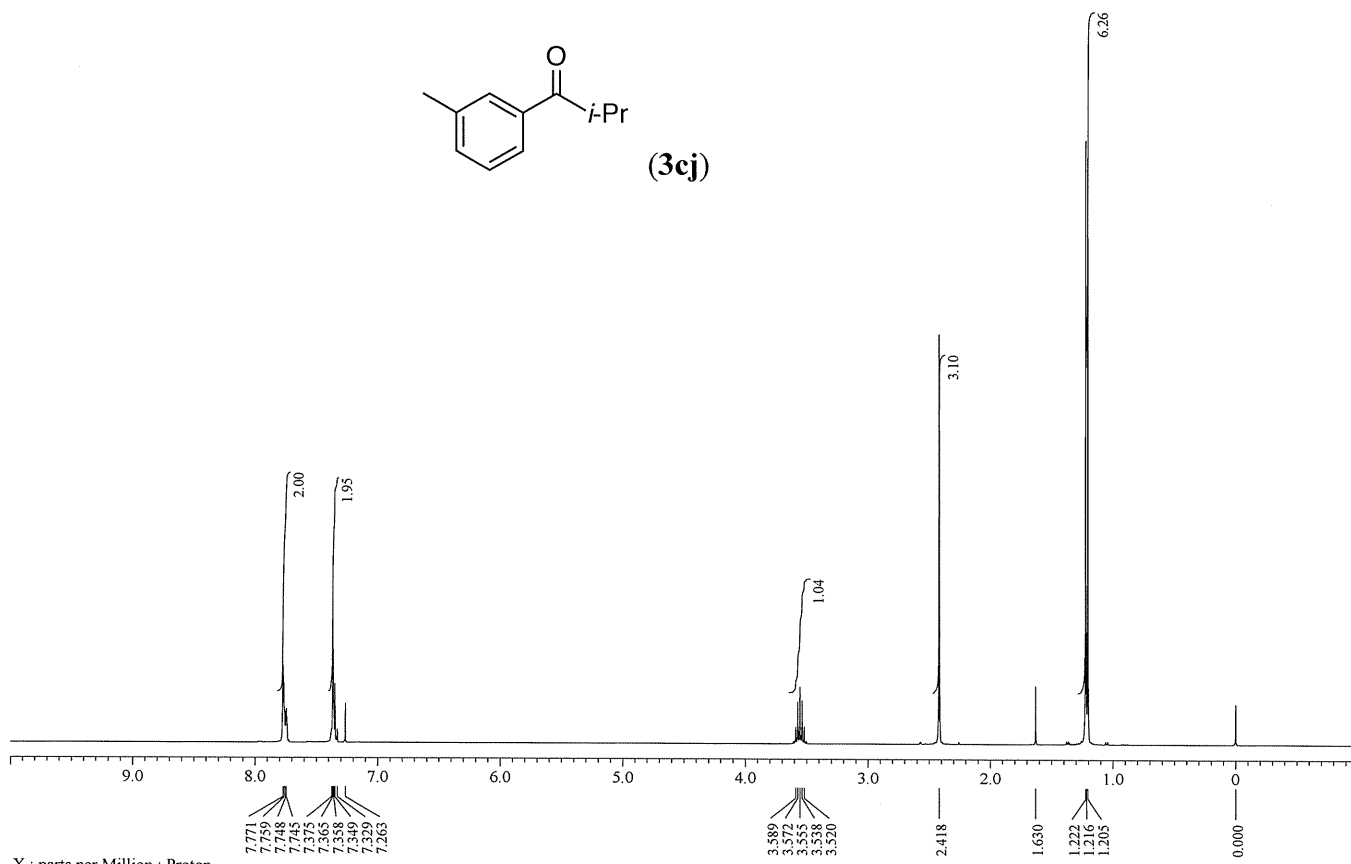

<sup>1</sup>H NMR, 400 MHz, CDCl<sub>3</sub>

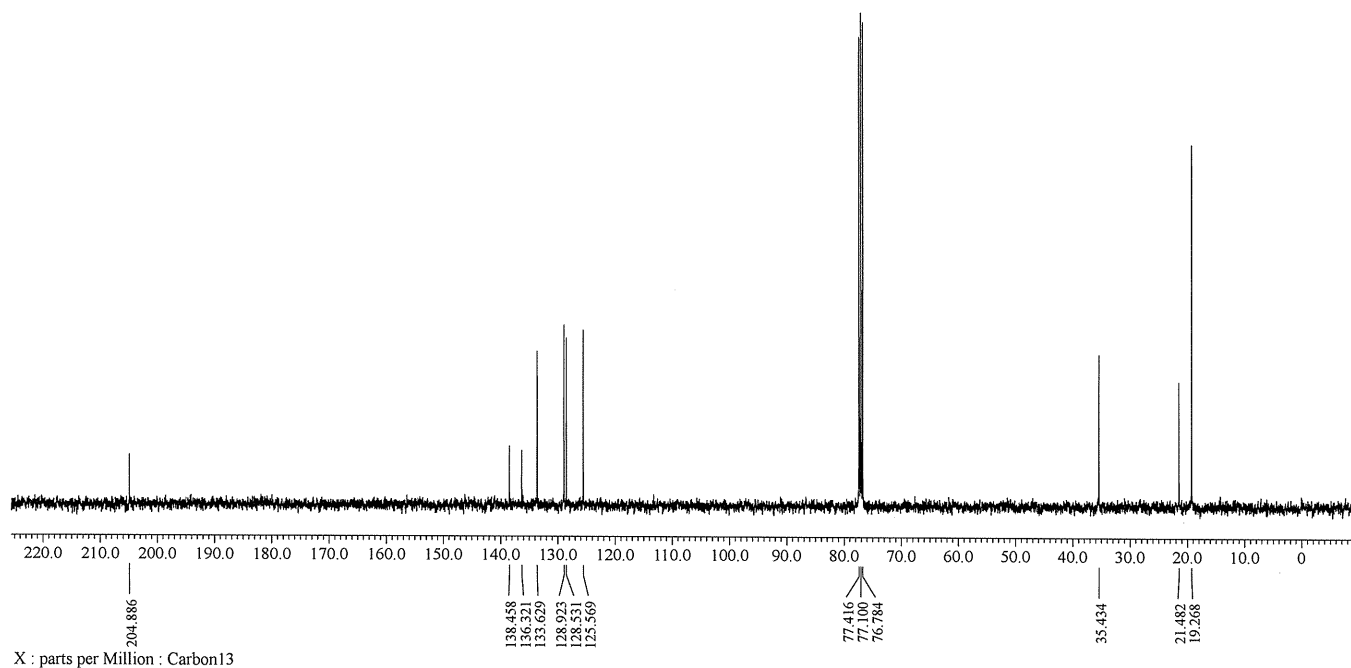

<sup>13</sup>C NMR, 100 MHz, CDCl<sub>3</sub>



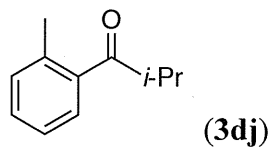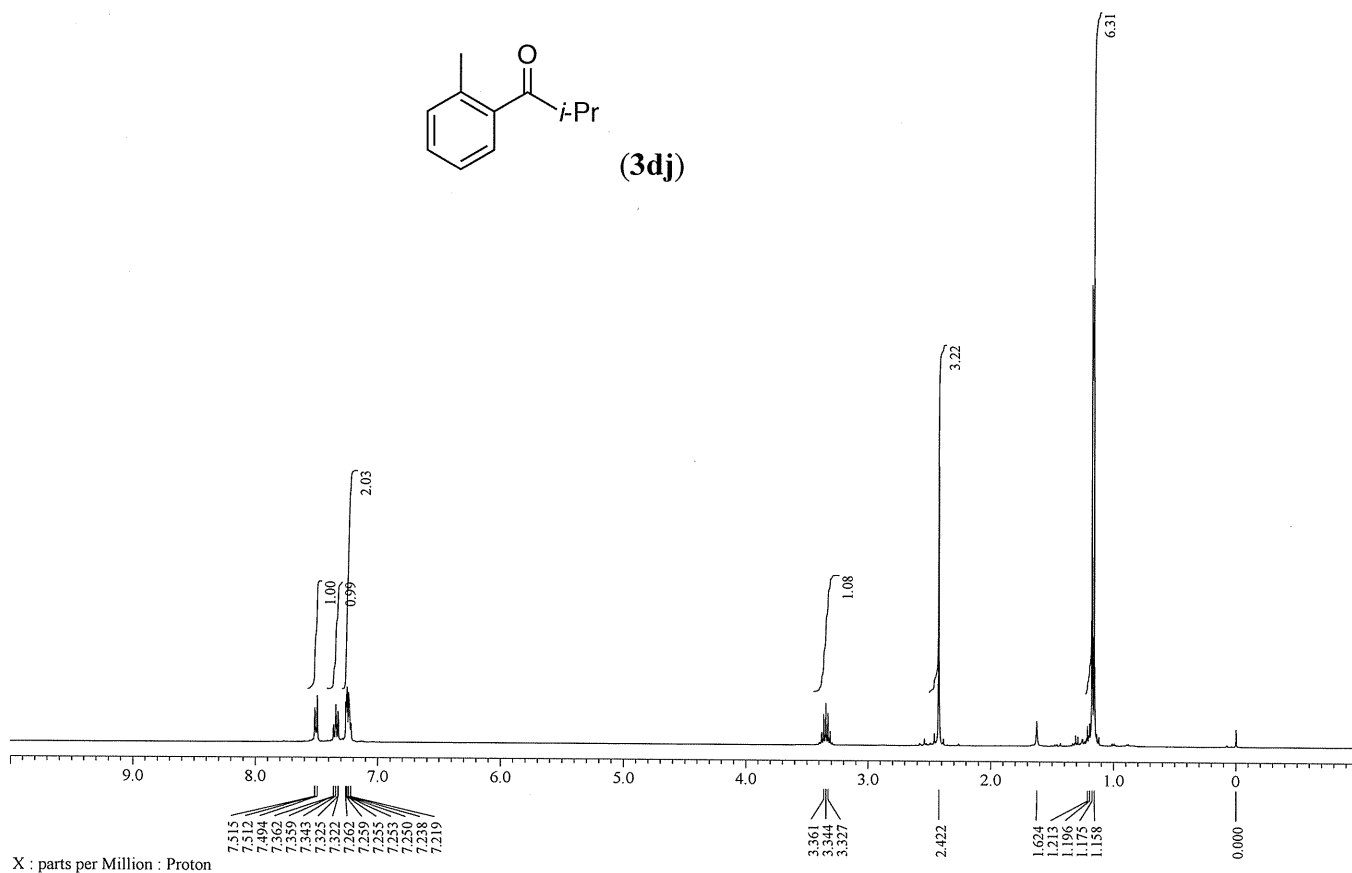

X : parts per Million : Proton

<sup>1</sup>H NMR, 400 MHz, CDCl<sub>3</sub>

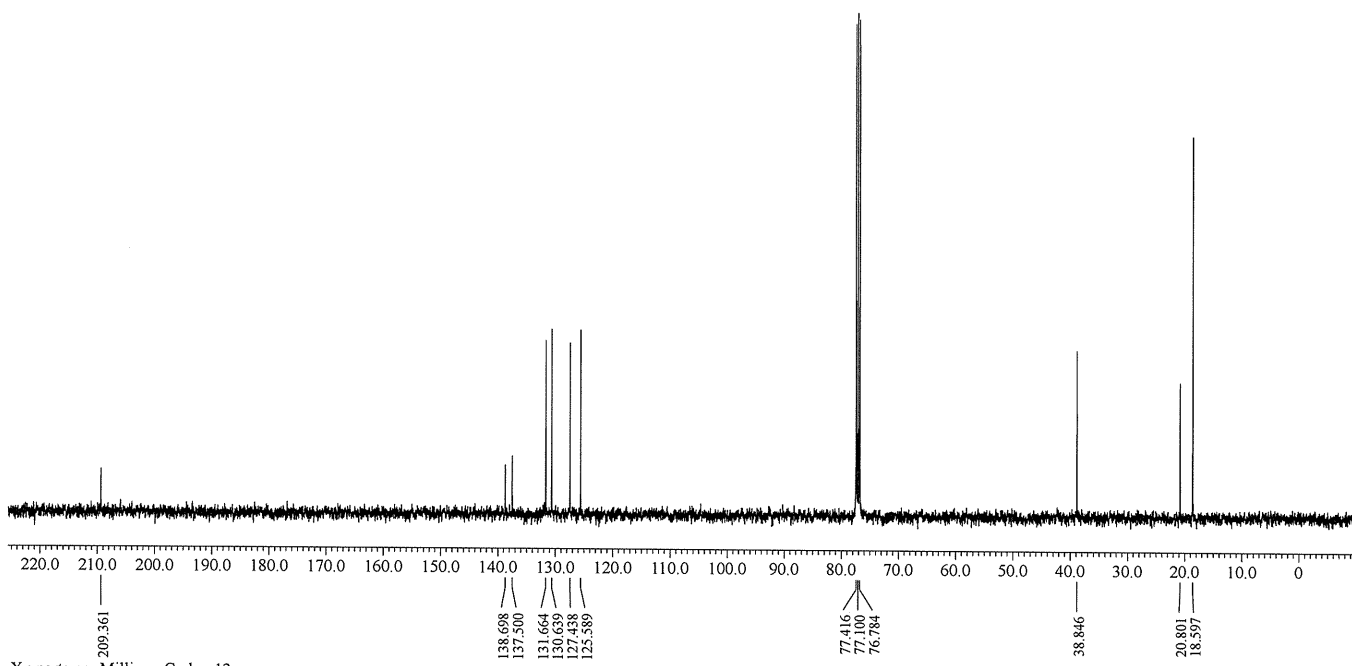

X : parts per Million : Carbon13

<sup>13</sup>C NMR, 100 MHz, CDCl<sub>3</sub>

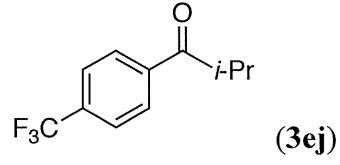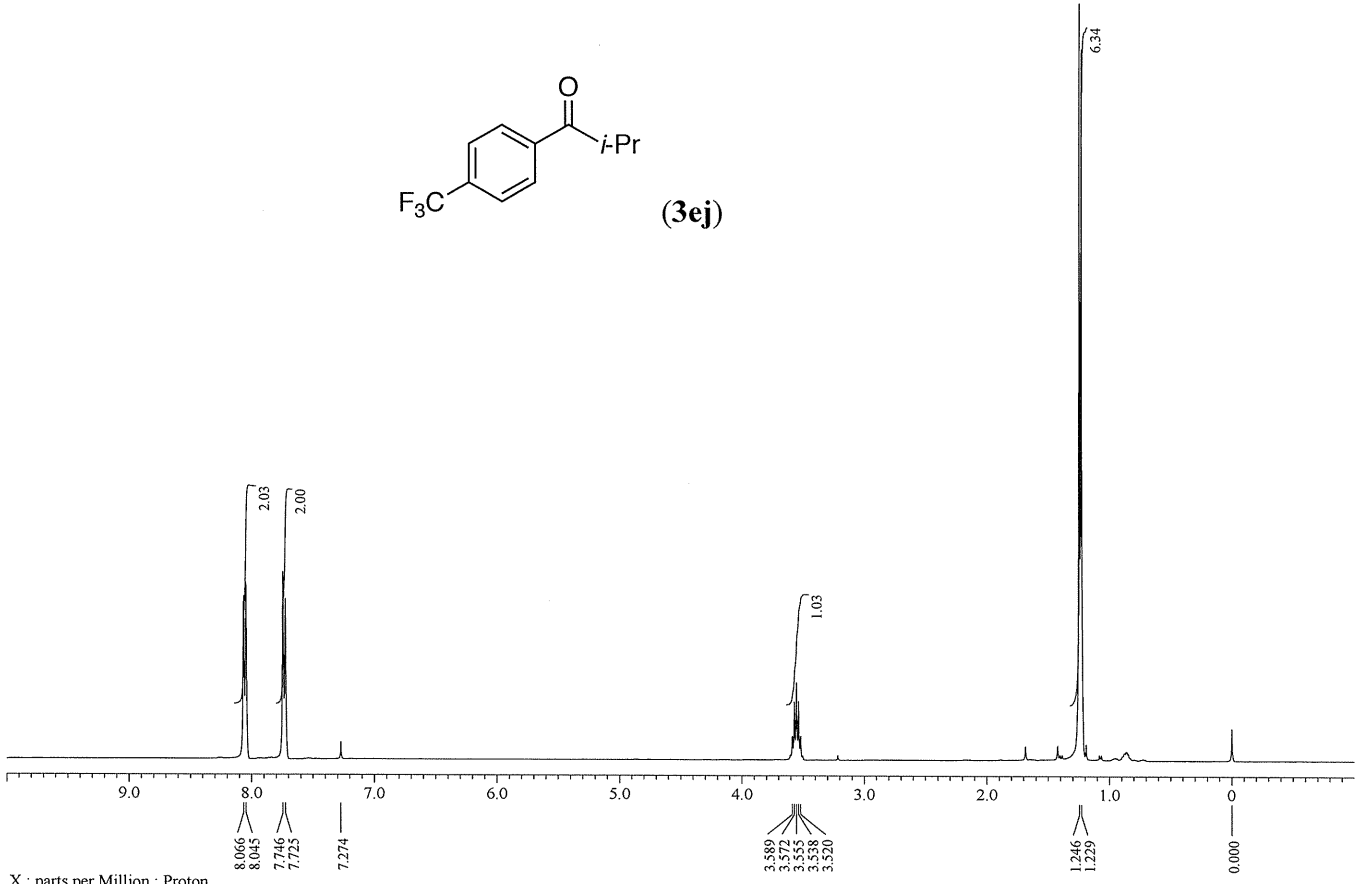

X : parts per Million : Proton  
<sup>1</sup>H NMR, 400 MHz, CDCl<sub>3</sub>

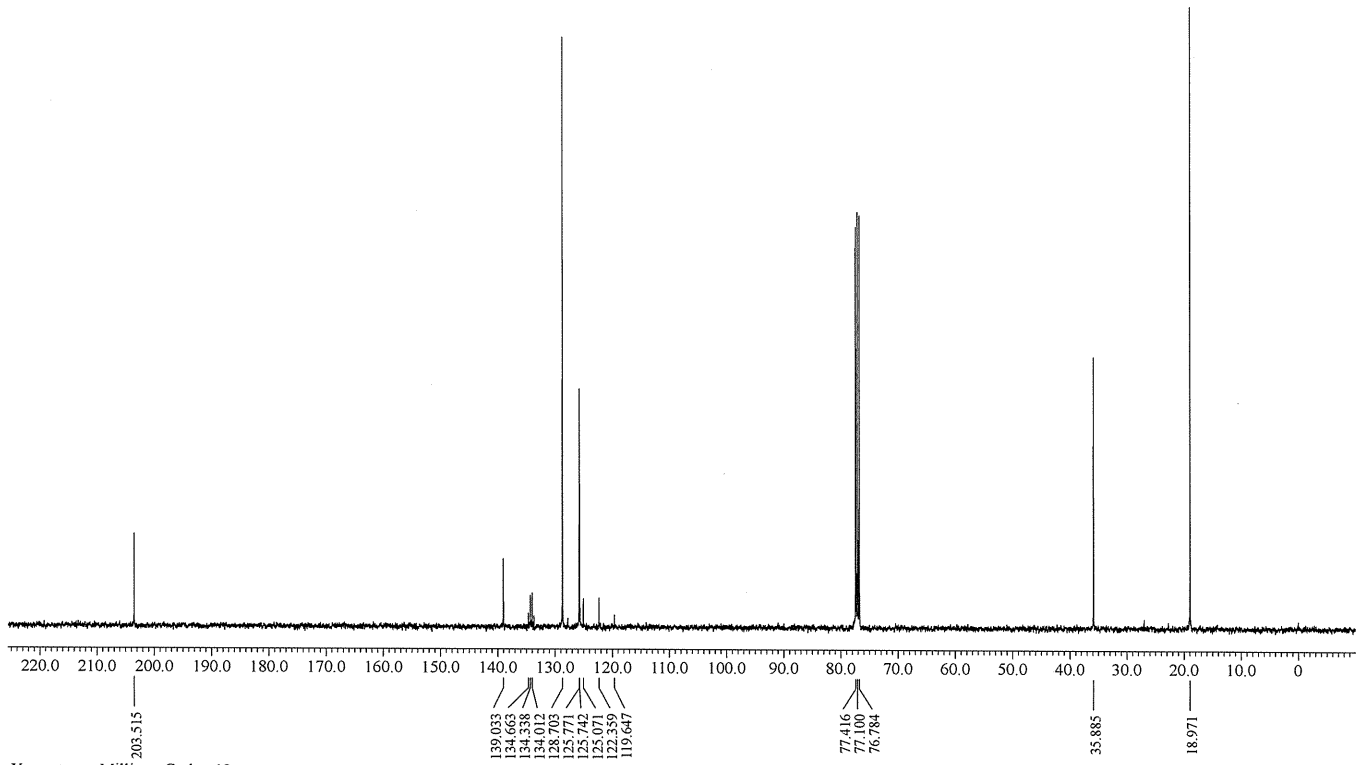

X : parts per Million : Carbon13  
<sup>13</sup>C NMR, 100 MHz, CDCl<sub>3</sub>

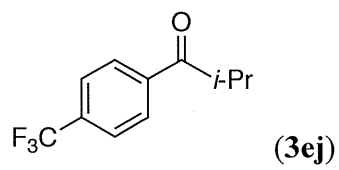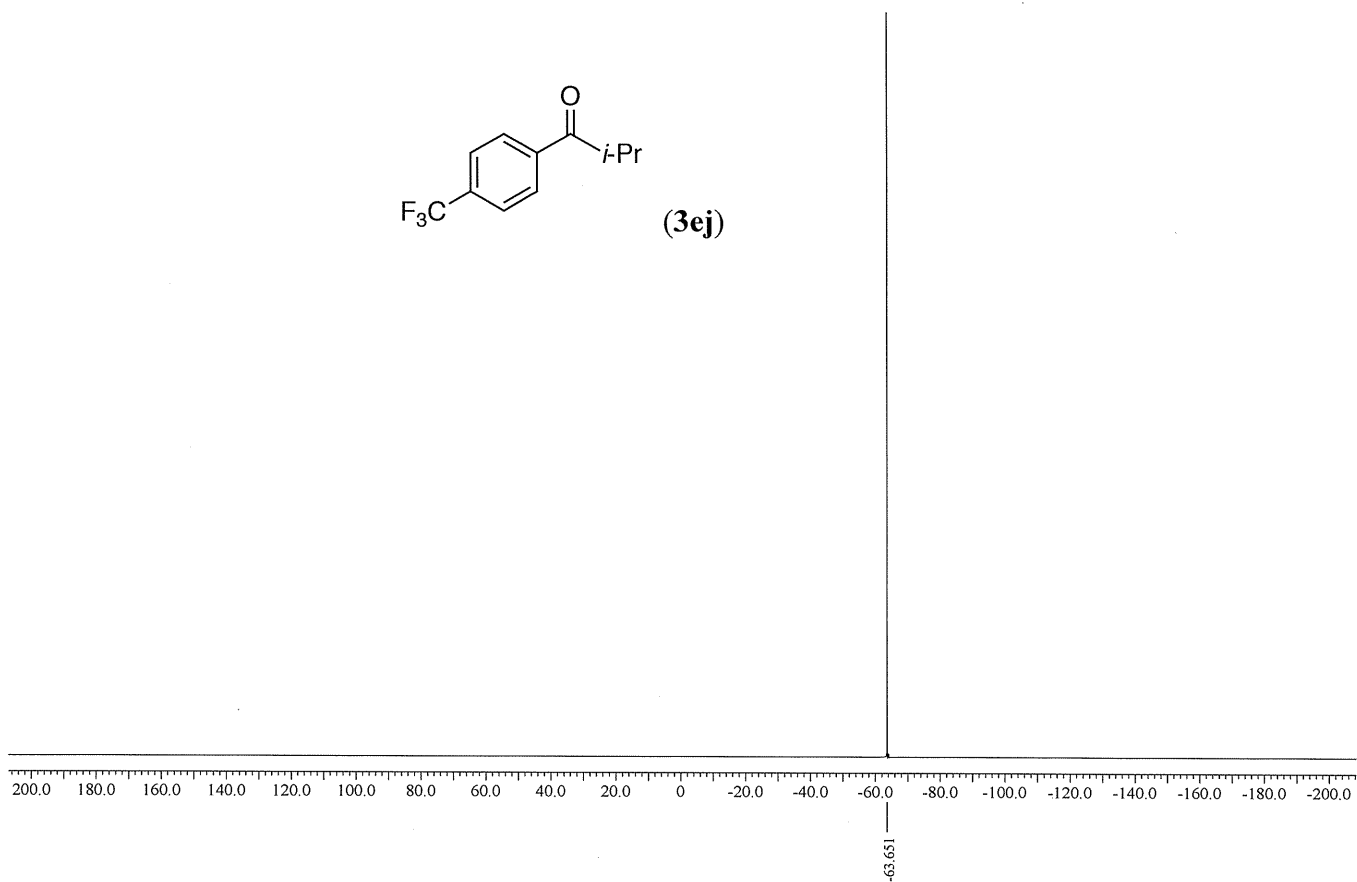

X : parts per Million : Fluorine19

$^{19}\text{F}$  NMR, 376 MHz,  $\text{CDCl}_3$

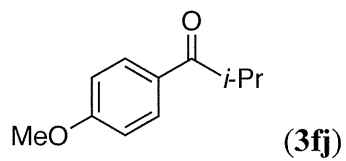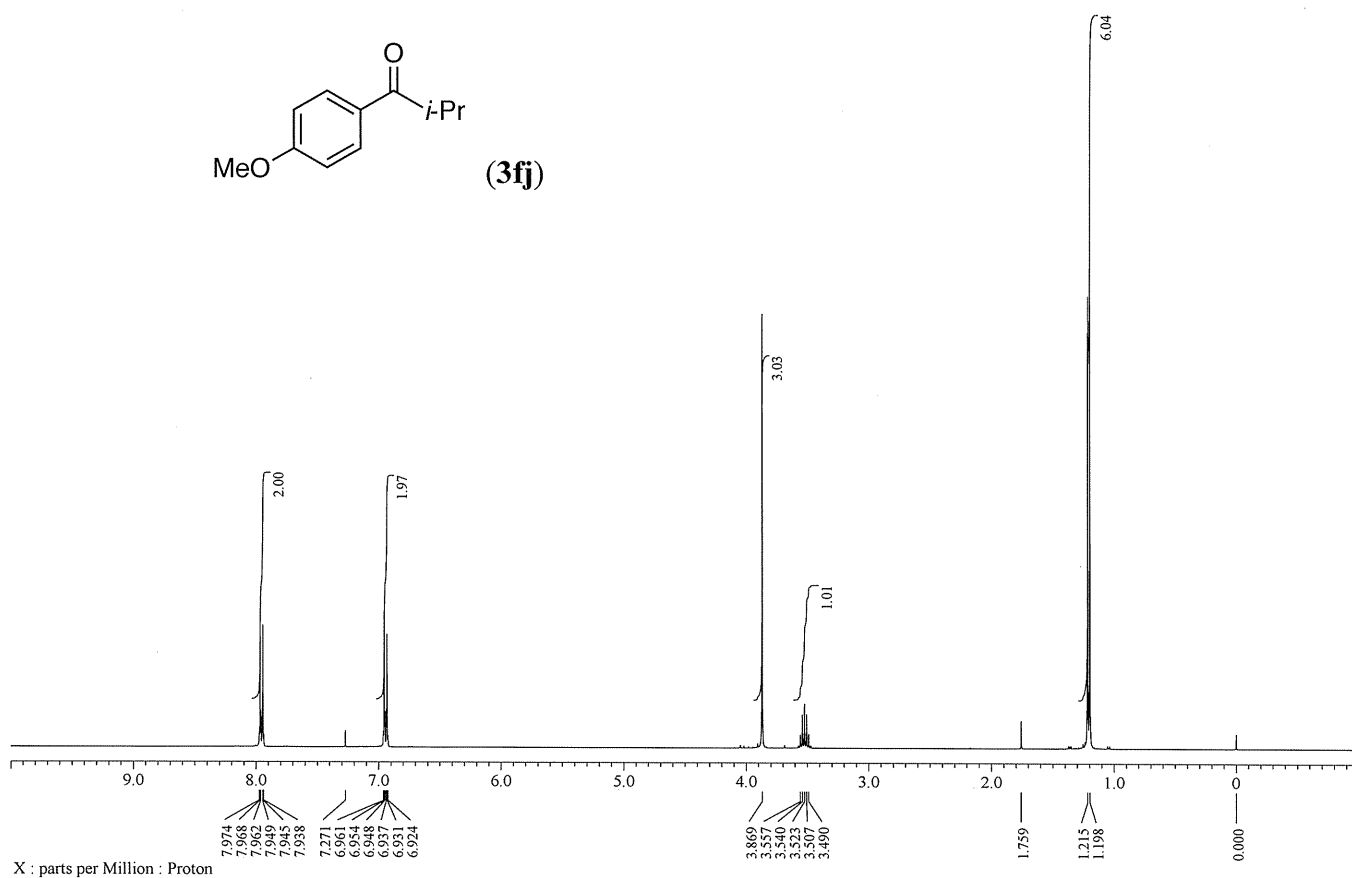

$^1\text{H}$  NMR, 400 MHz,  $\text{CDCl}_3$

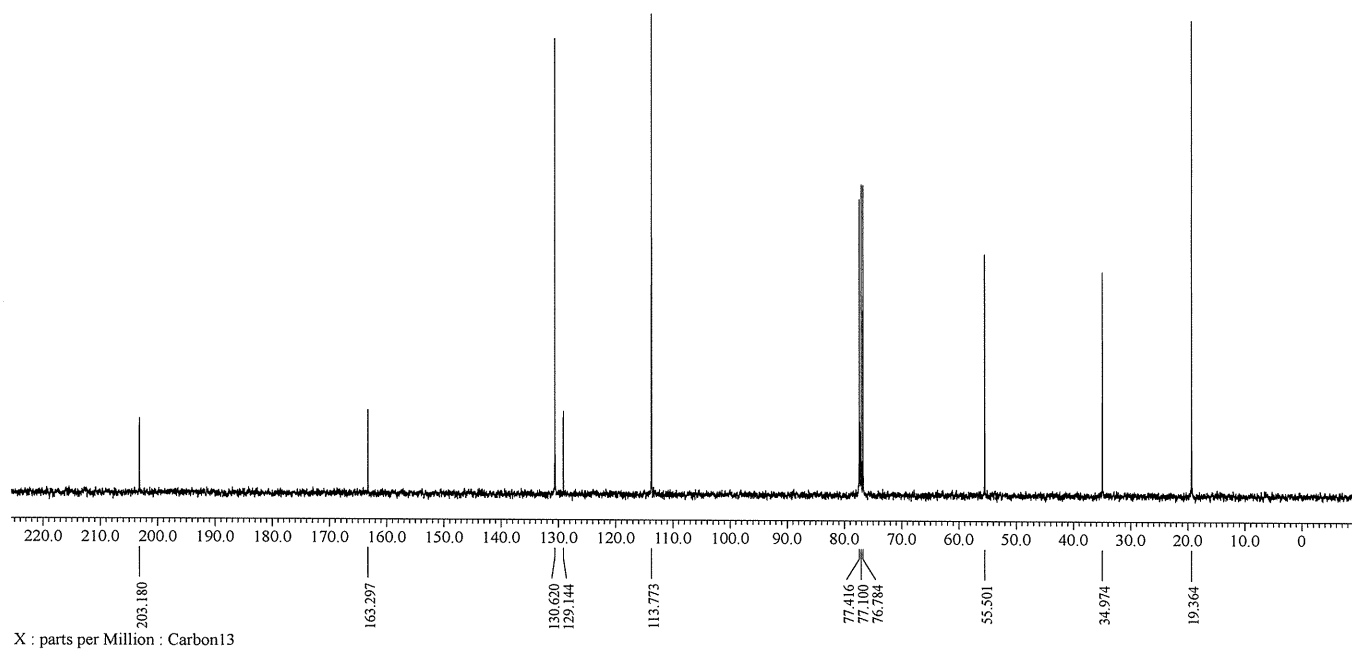

$^{13}\text{C}$  NMR, 100 MHz,  $\text{CDCl}_3$

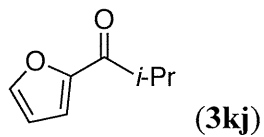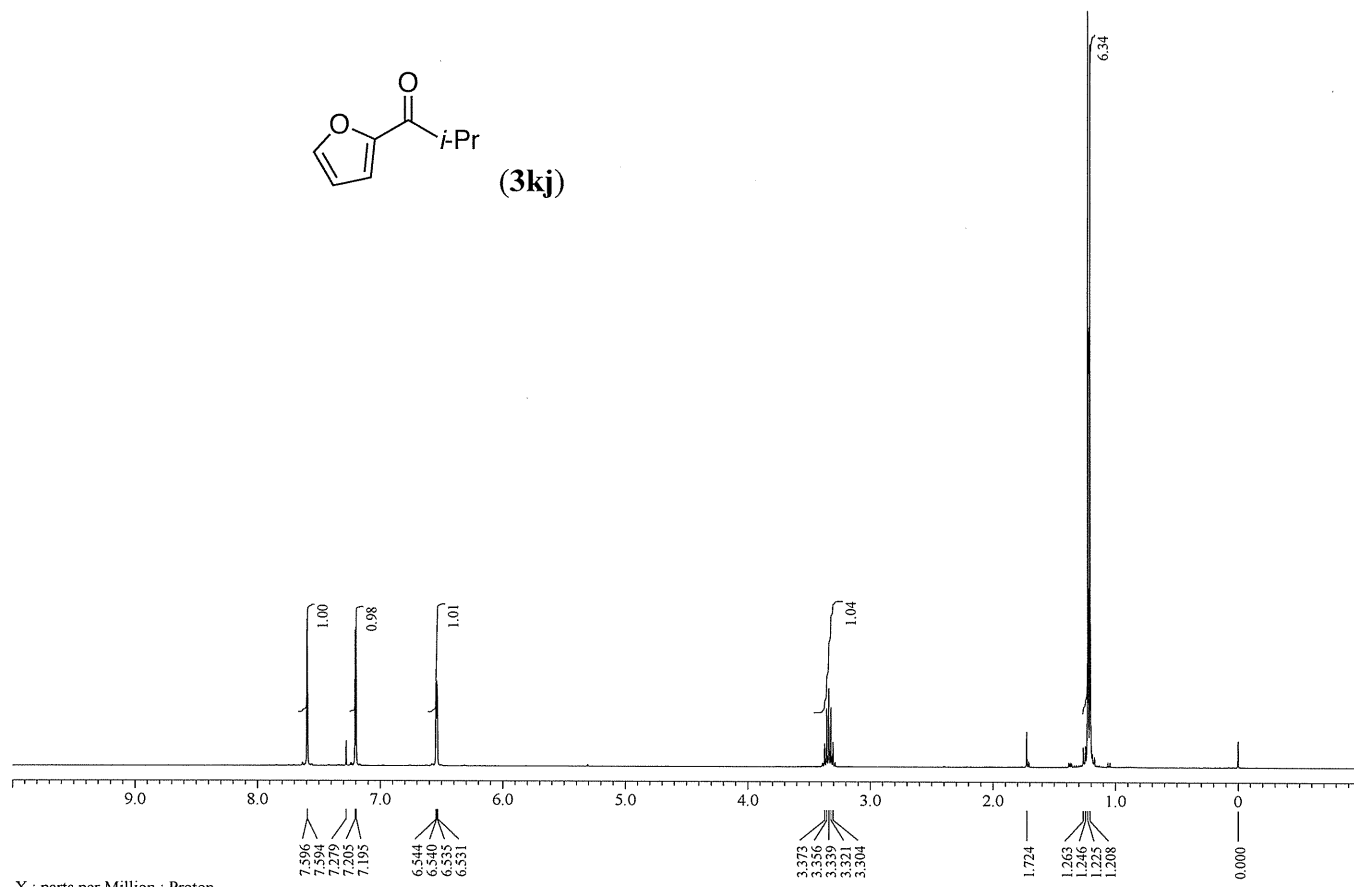

X : parts per Million : Proton

<sup>1</sup>H NMR, 400 MHz, CDCl<sub>3</sub>

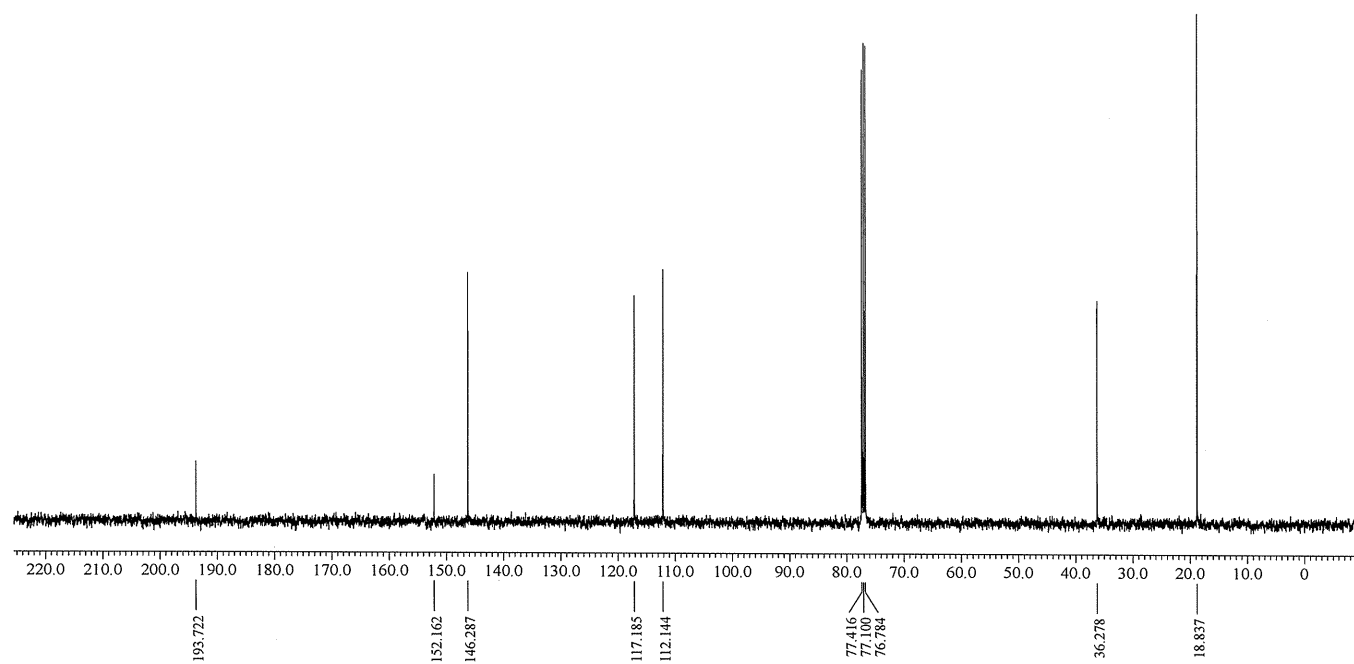

X : parts per Million : Carbon13

<sup>13</sup>C NMR, 100 MHz, CDCl<sub>3</sub>

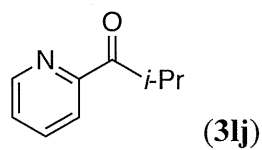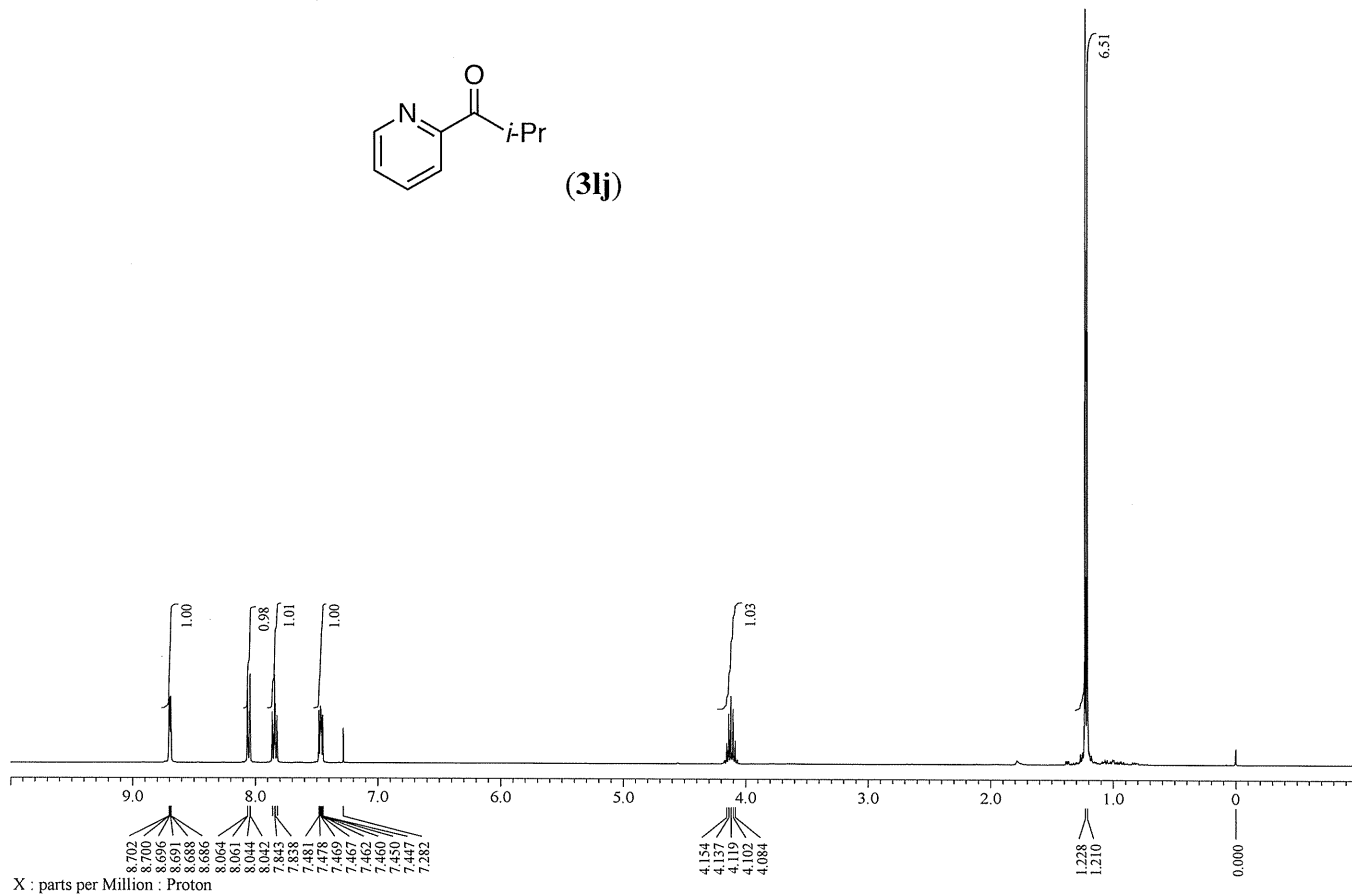

$^1\text{H}$  NMR, 400 MHz,  $\text{CDCl}_3$

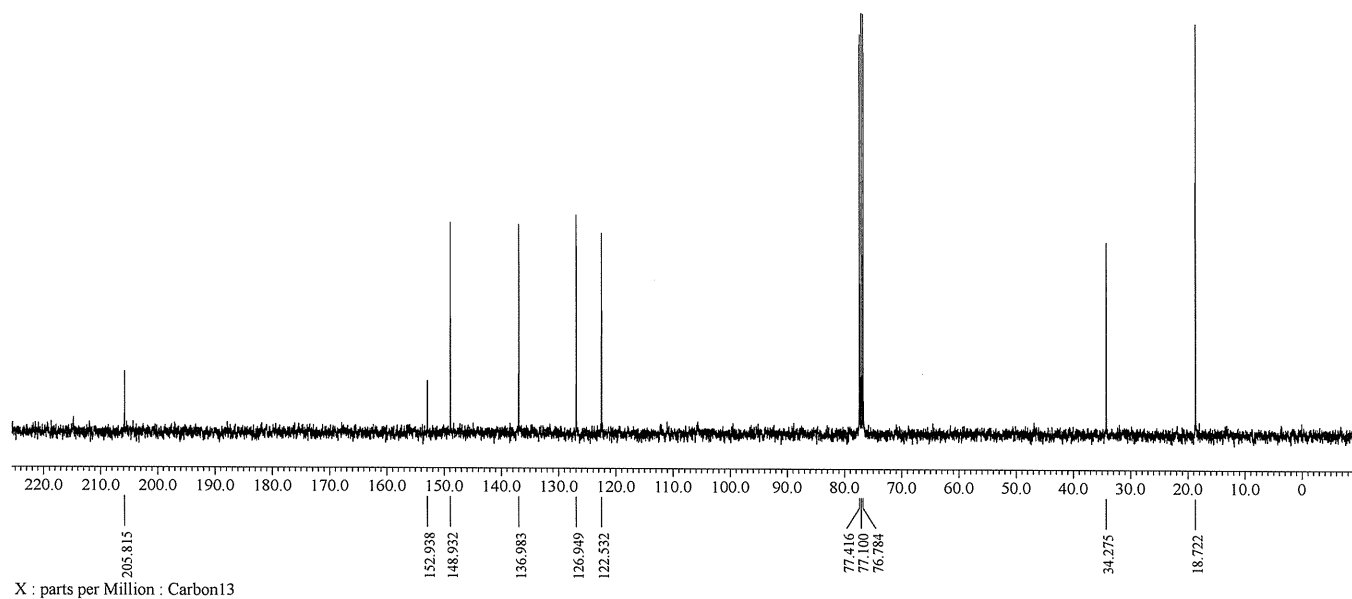

$^{13}\text{C}$  NMR, 100 MHz,  $\text{CDCl}_3$

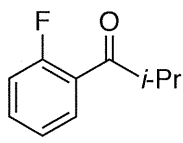

(3mj)

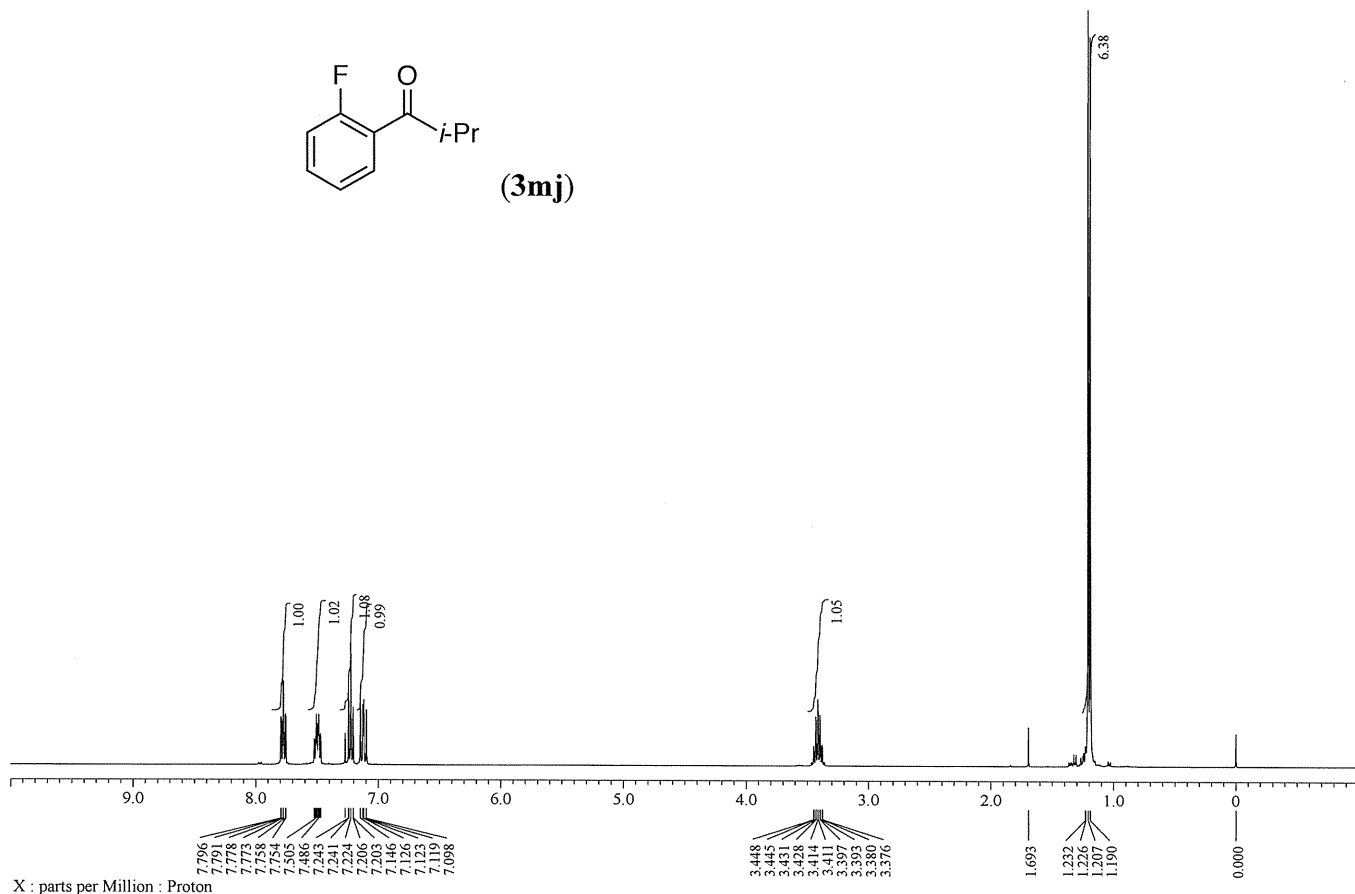

X : parts per Million : Proton

<sup>1</sup>H NMR, 400 MHz, CDCl<sub>3</sub>

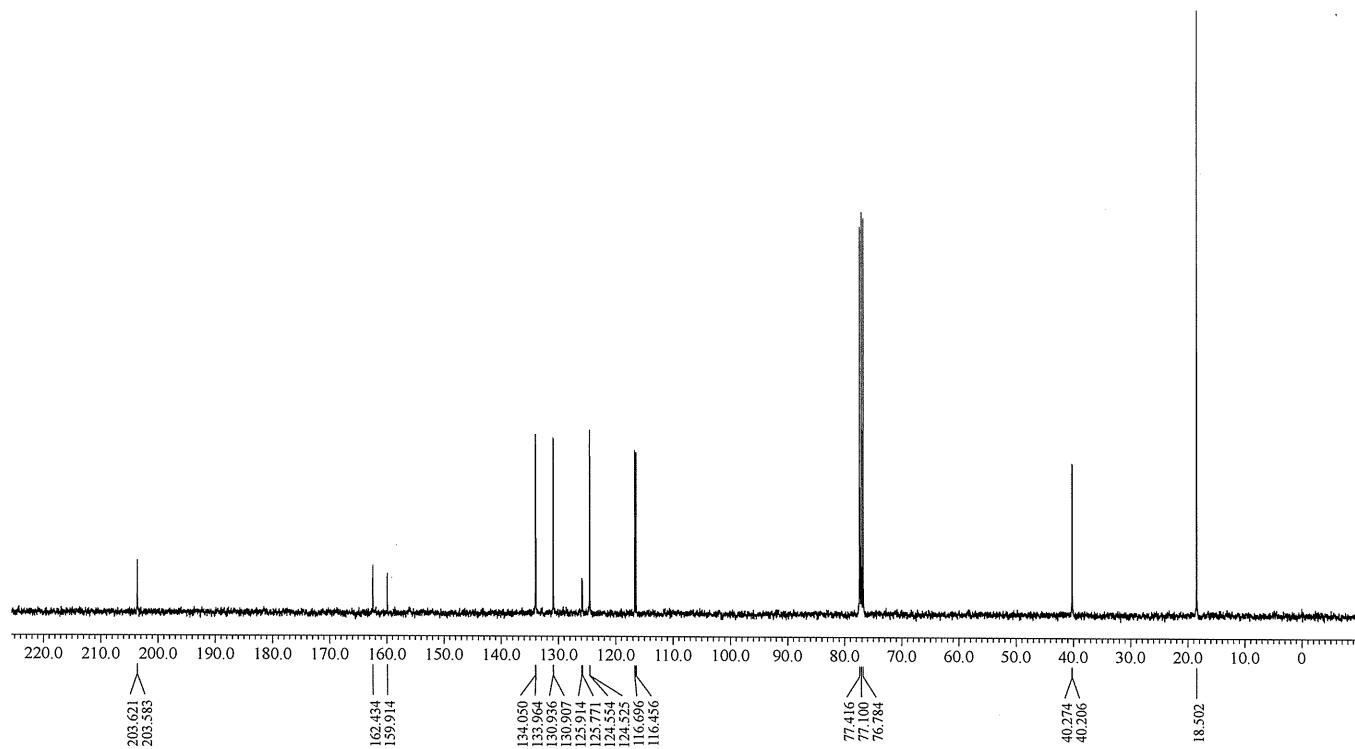

X : parts per Million : Carbon13

<sup>13</sup>C NMR, 100 MHz, CDCl<sub>3</sub>

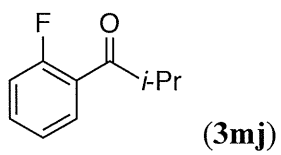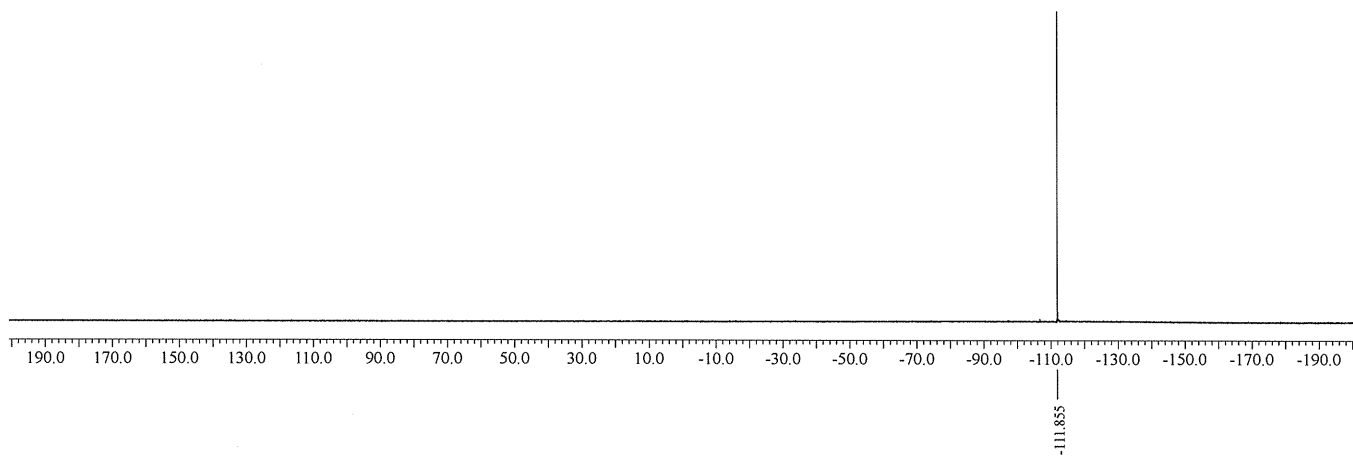

X : parts per Million : Fluorine19

$^{19}\text{F}$  NMR, 376 MHz,  $\text{CDCl}_3$



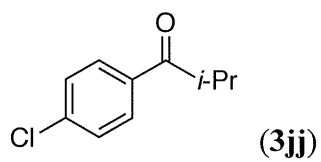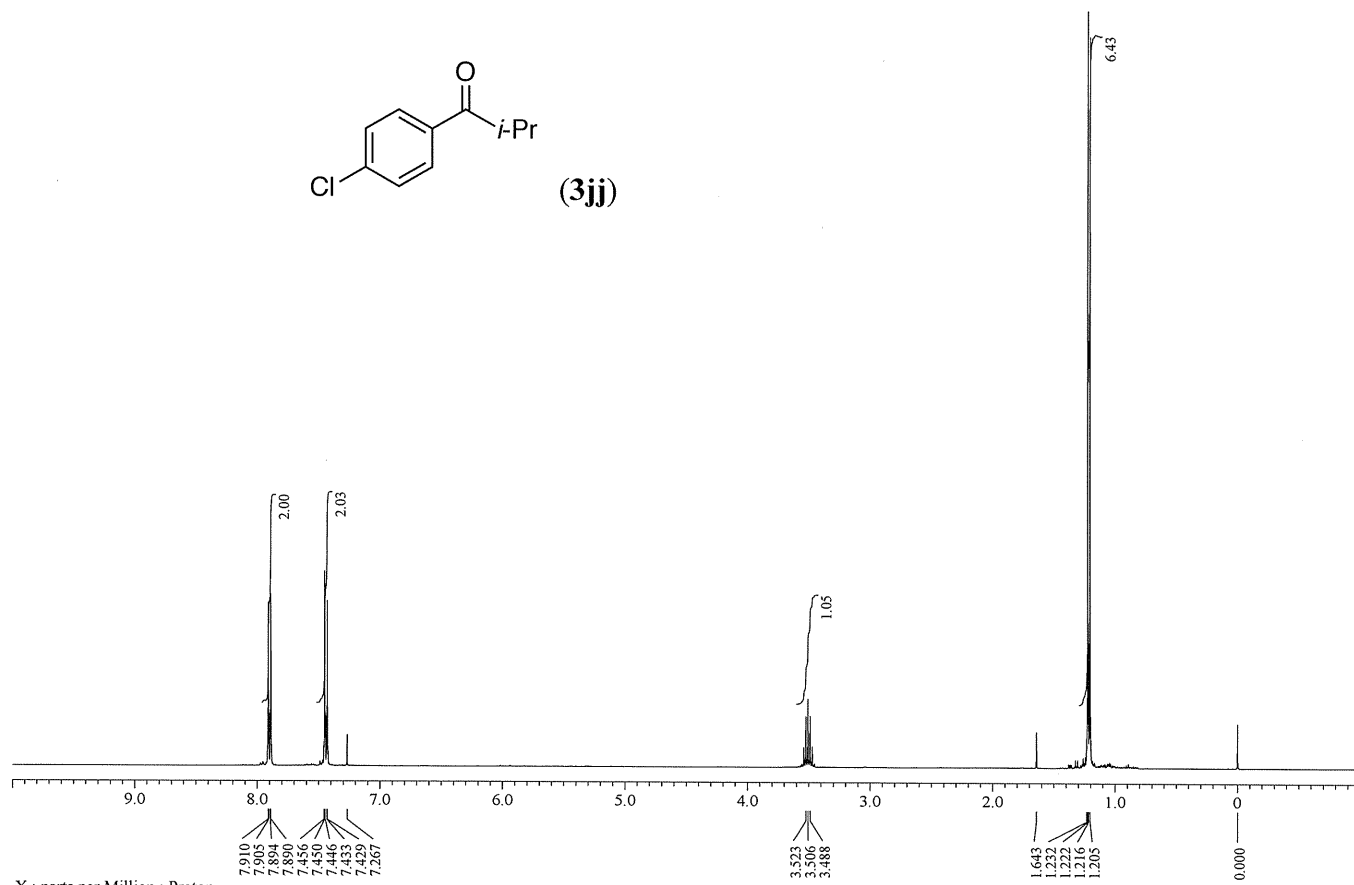

X : parts per Million : Proton

<sup>1</sup>H NMR, 400 MHz, CDCl<sub>3</sub>

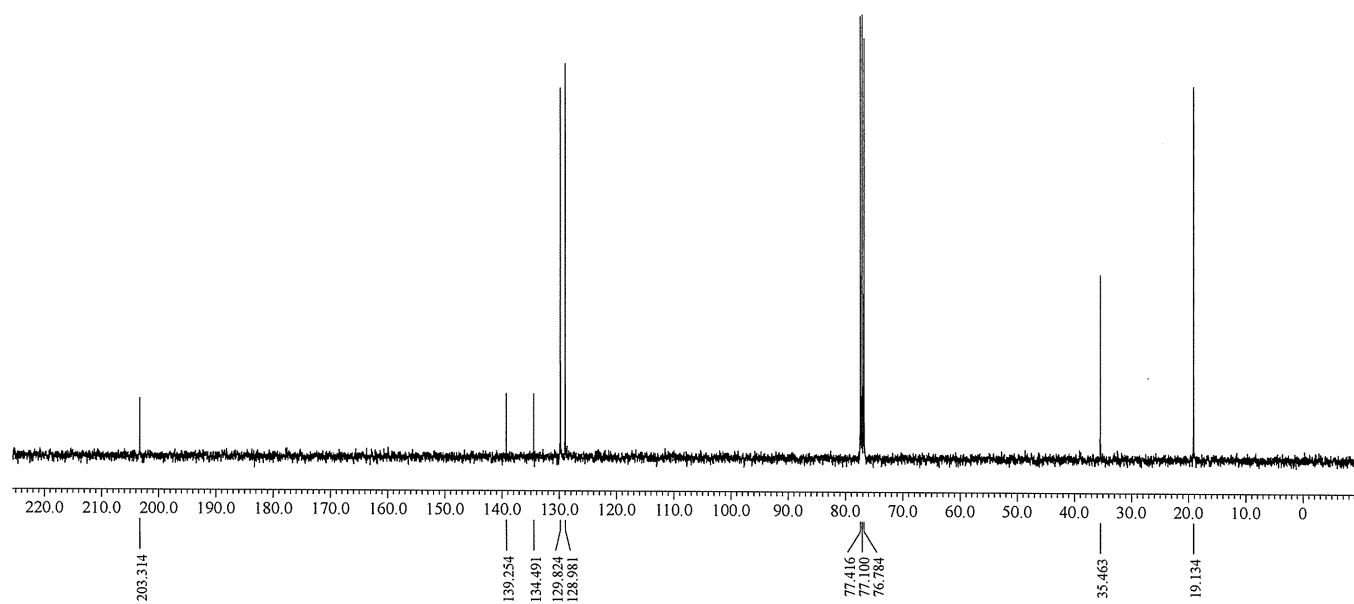

X : parts per Million : Carbon13

<sup>13</sup>C NMR, 100 MHz, CDCl<sub>3</sub>

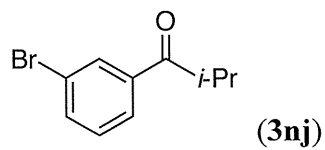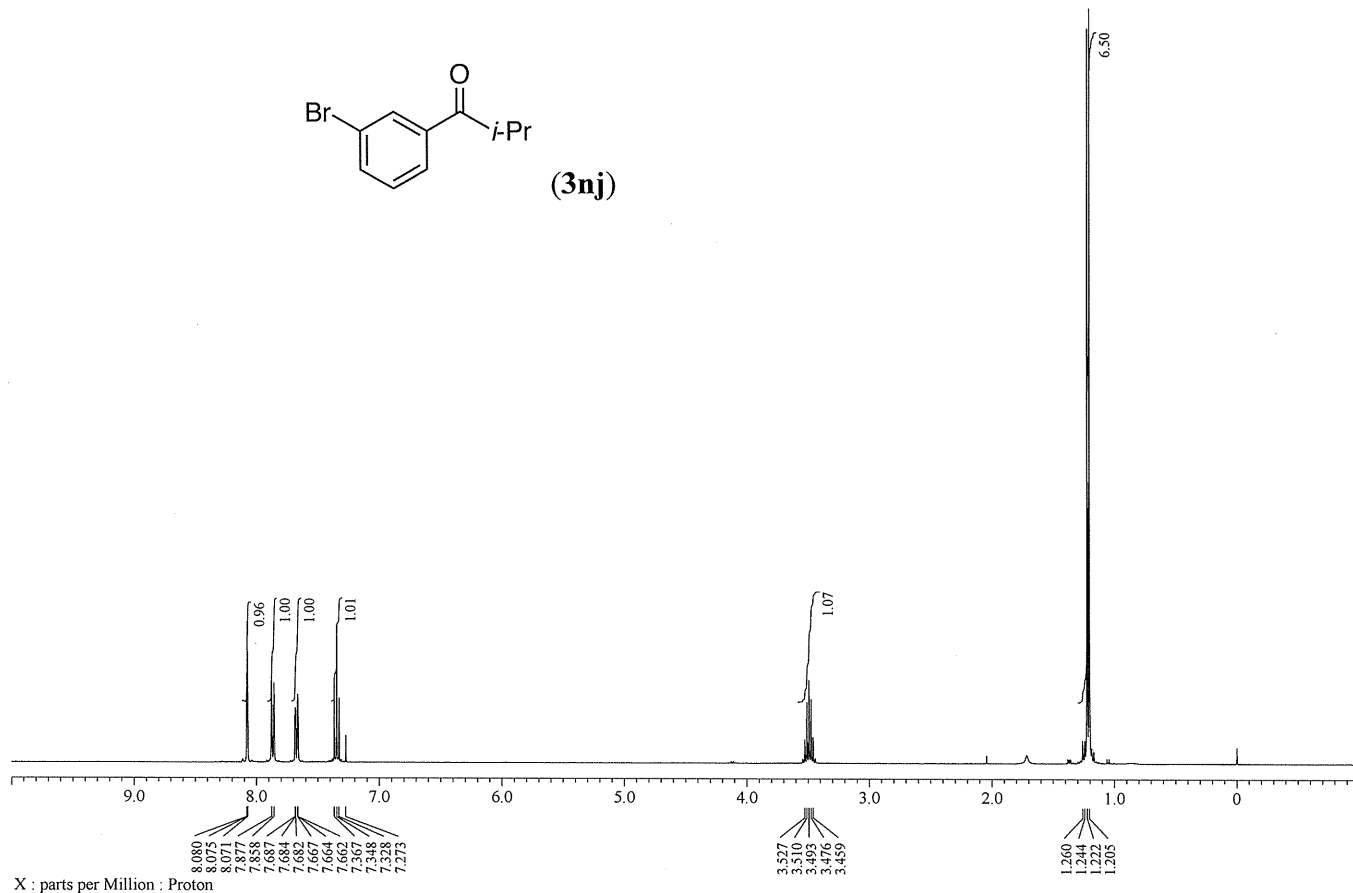

$^1\text{H}$  NMR, 400 MHz,  $\text{CDCl}_3$

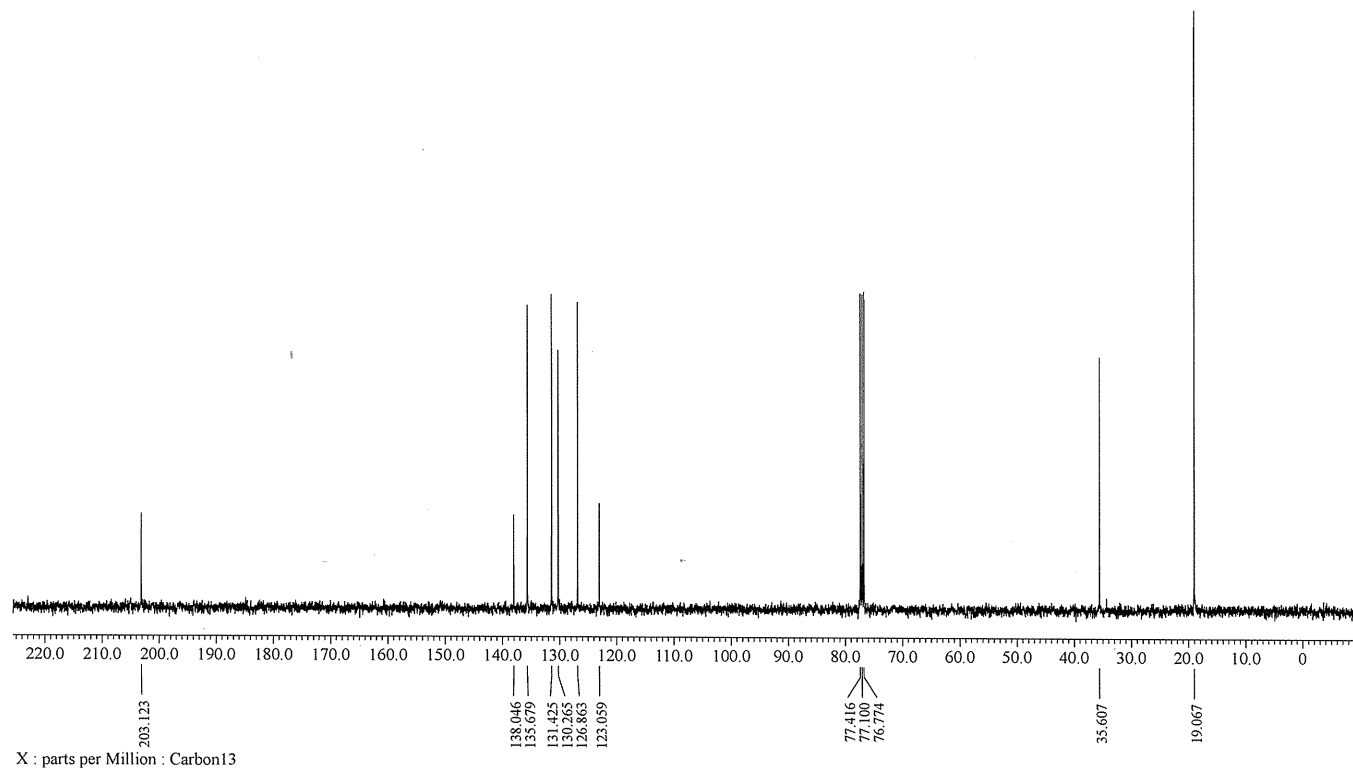

$^{13}\text{C}$  NMR, 100 MHz,  $\text{CDCl}_3$

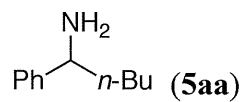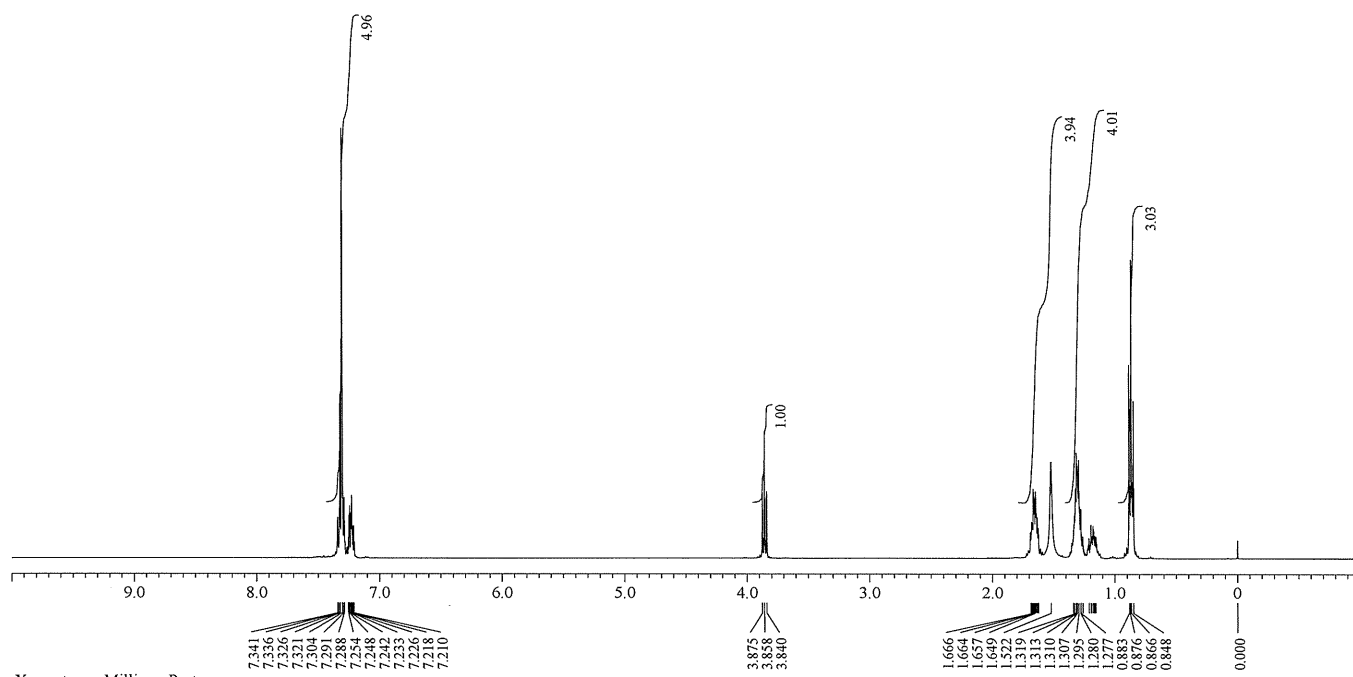

<sup>1</sup>H NMR, 400 MHz, CDCl<sub>3</sub>

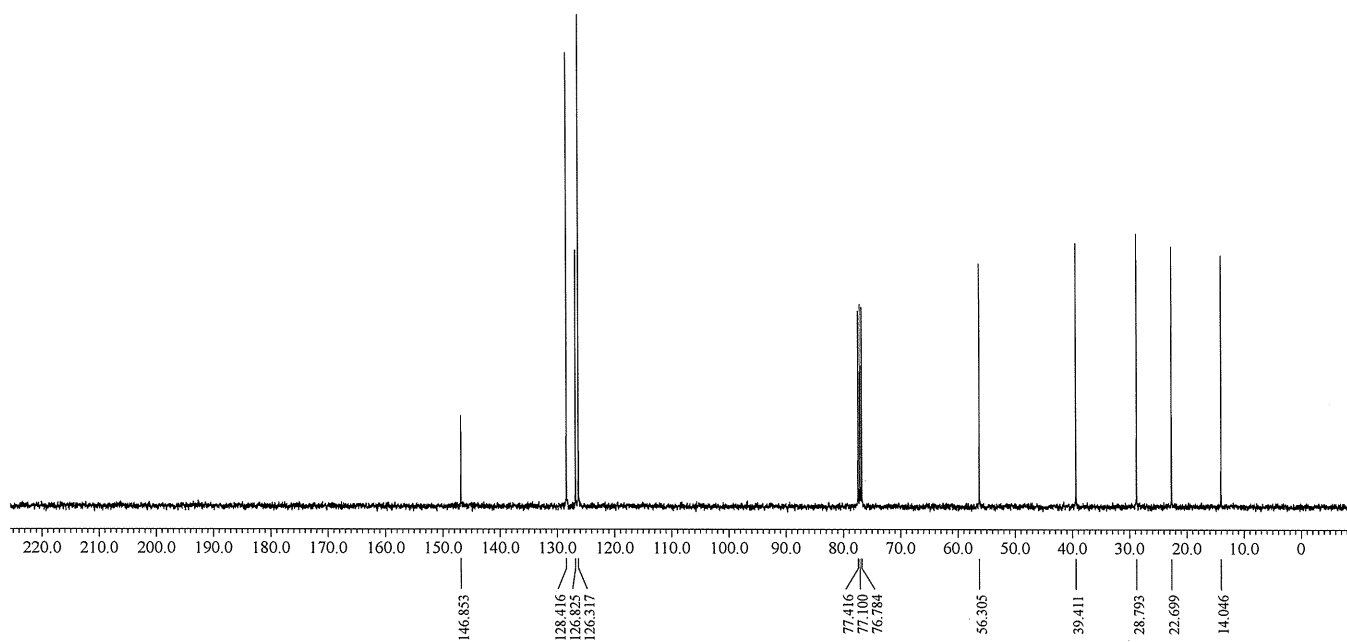

<sup>13</sup>C NMR, 100 MHz, CDCl<sub>3</sub>

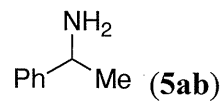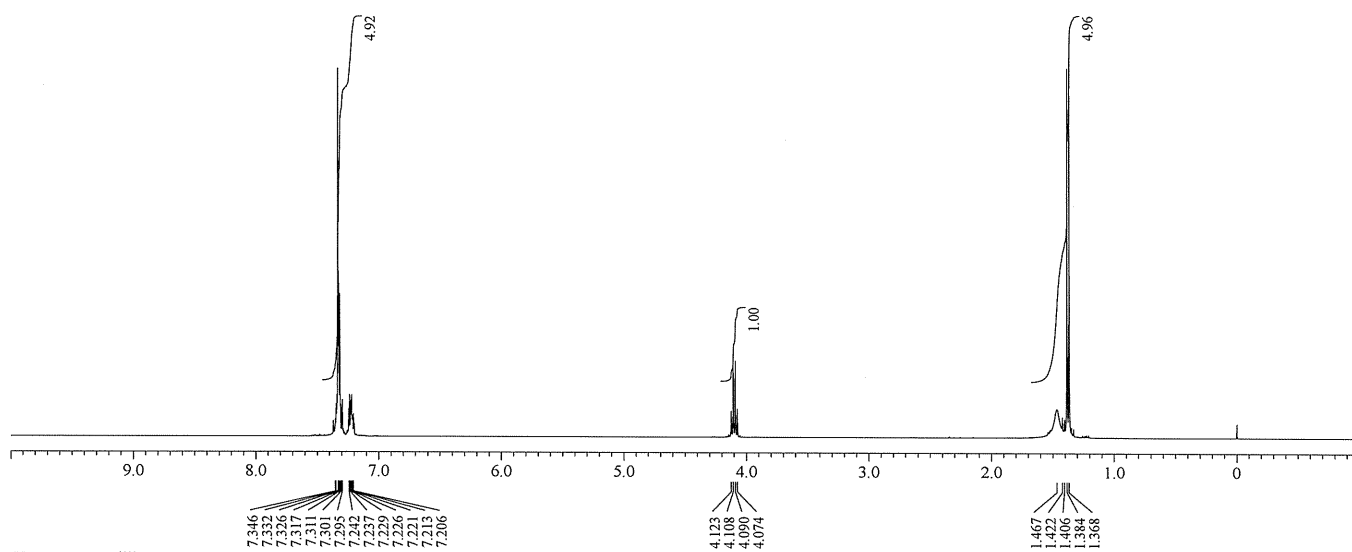

<sup>1</sup>H NMR, 400 MHz, CDCl<sub>3</sub>

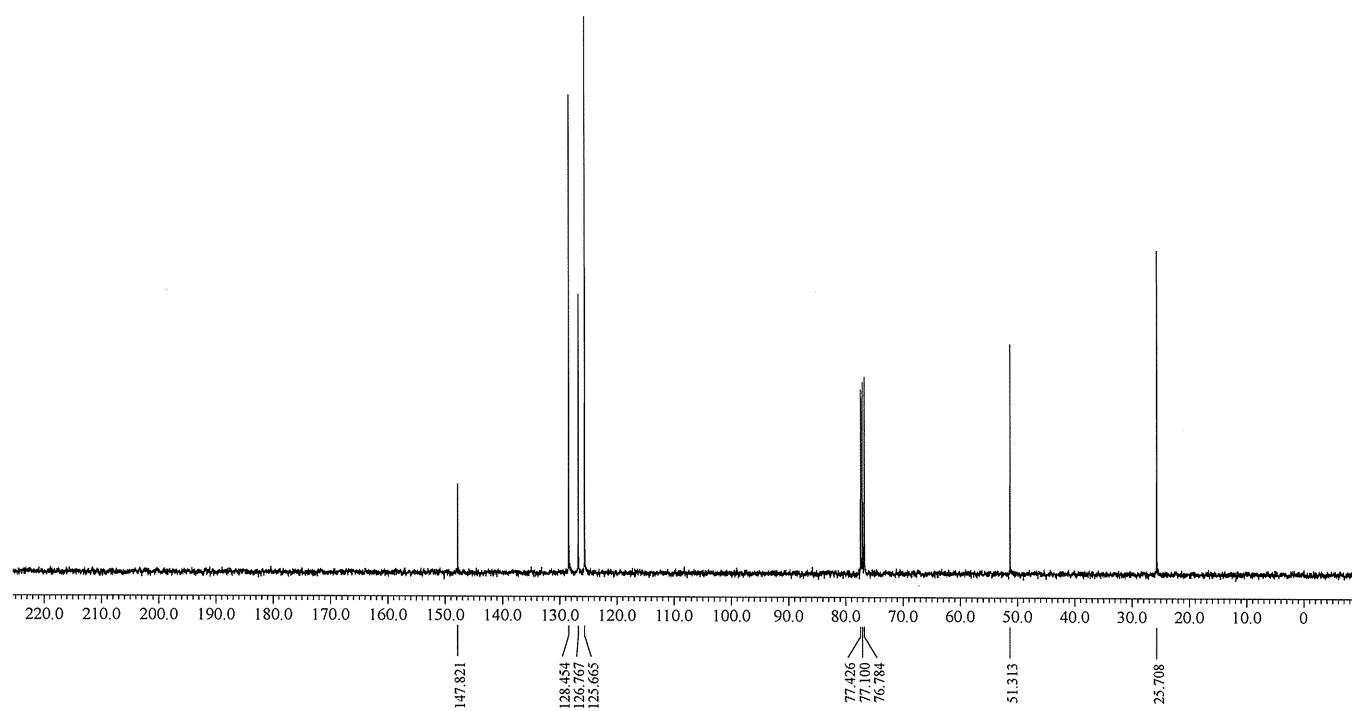

<sup>13</sup>C NMR, 100 MHz, CDCl<sub>3</sub>

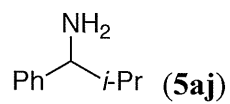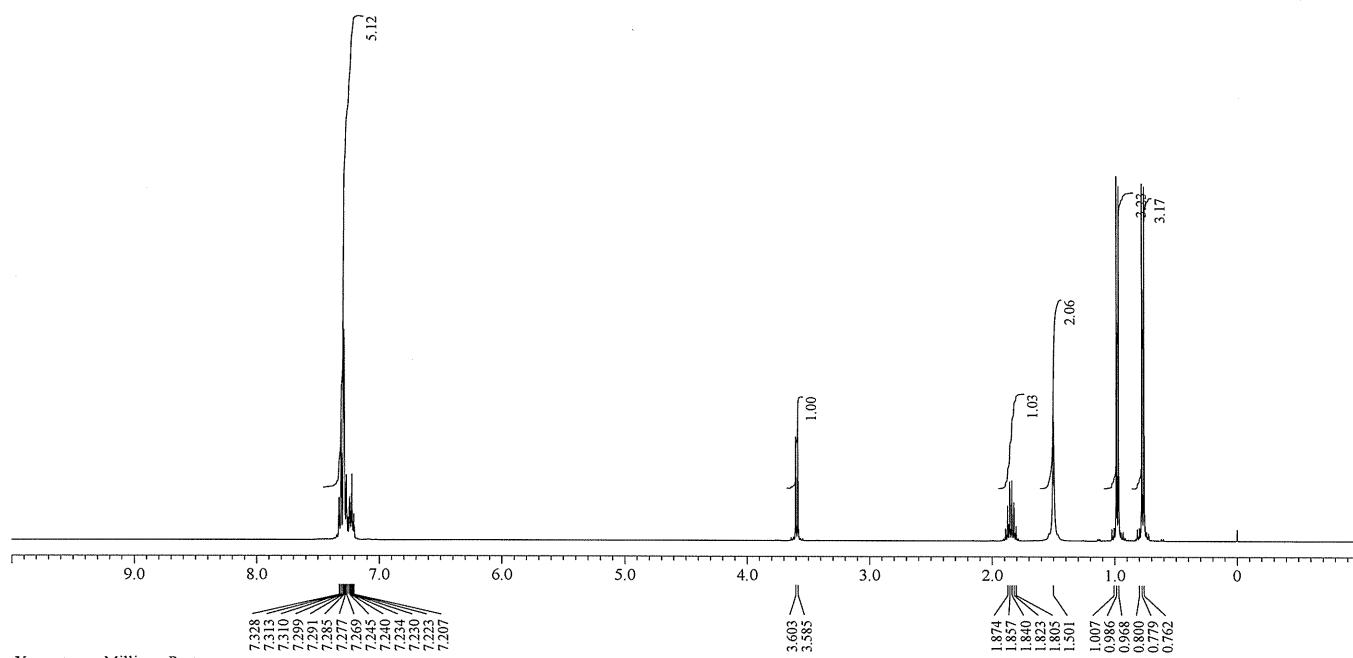

$^1\text{H}$  NMR, 400 MHz,  $\text{CDCl}_3$

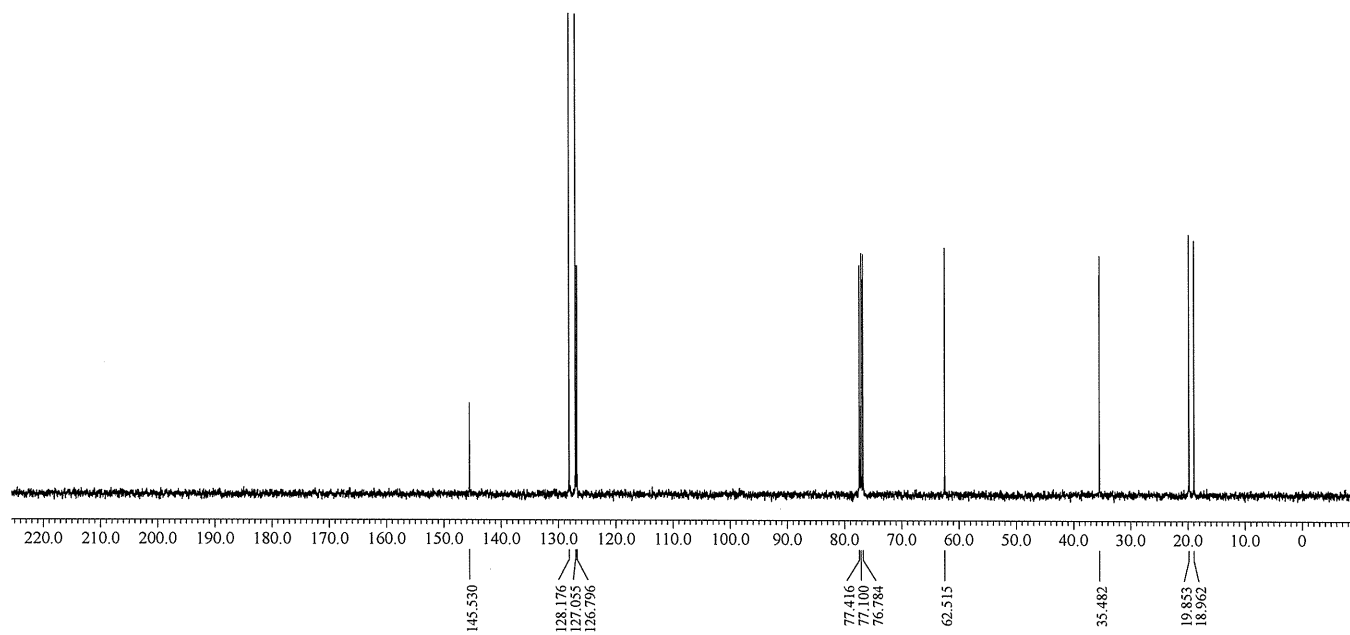

$^{13}\text{C}$  NMR, 100 MHz,  $\text{CDCl}_3$

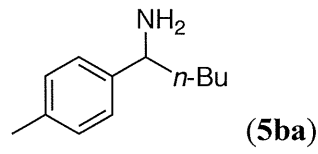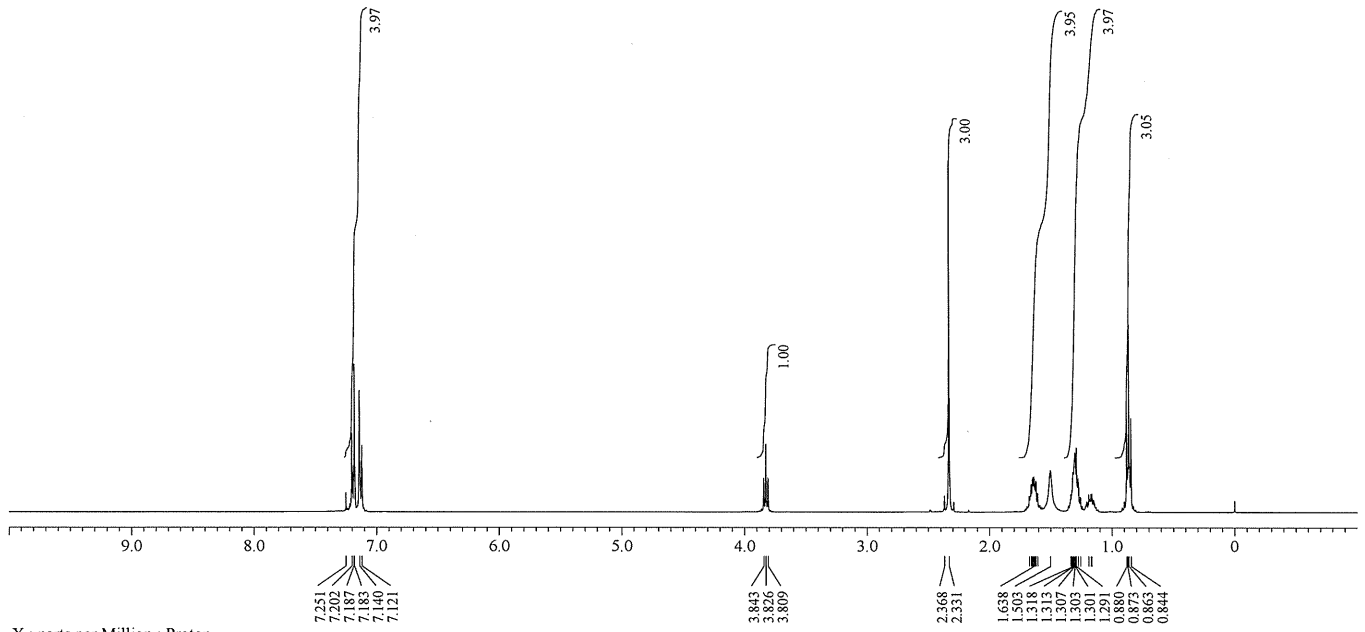

<sup>1</sup>H NMR, 400 MHz, CDCl<sub>3</sub>

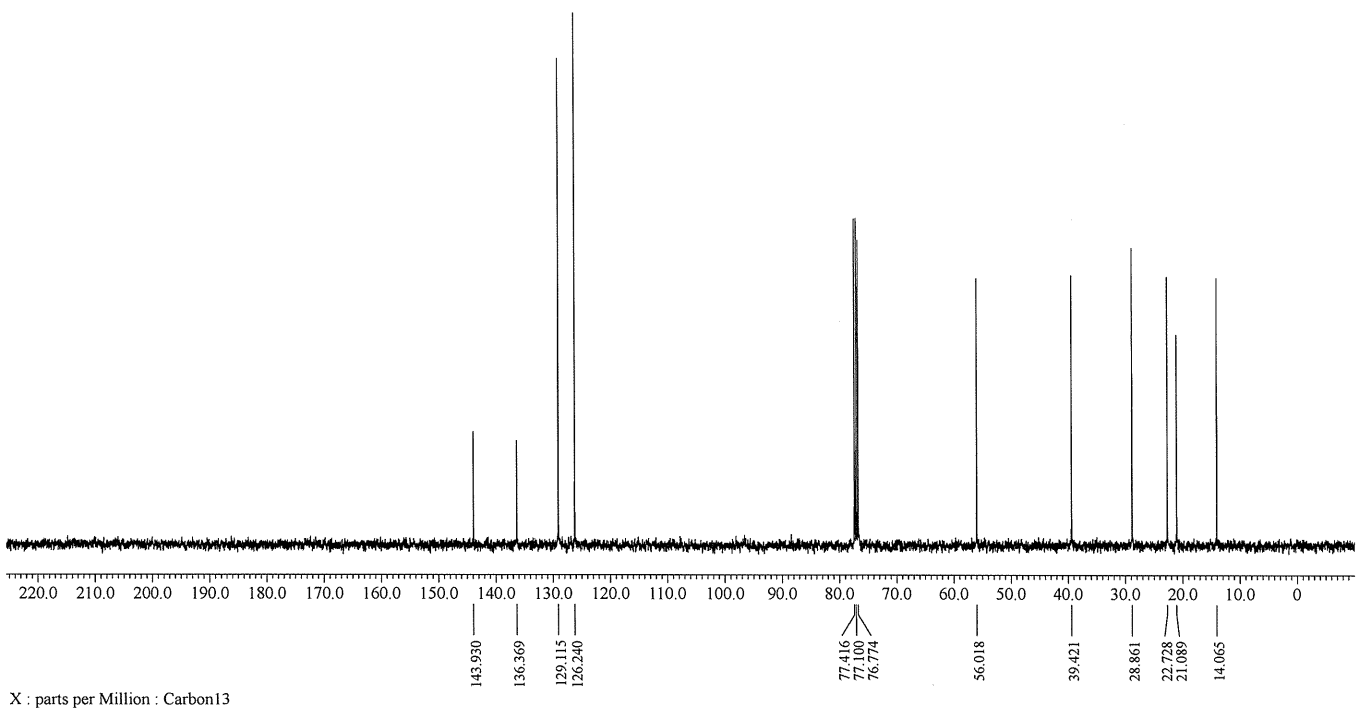

<sup>13</sup>C NMR, 100 MHz, CDCl<sub>3</sub>

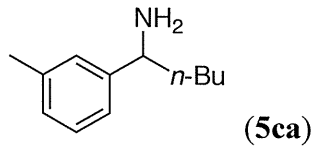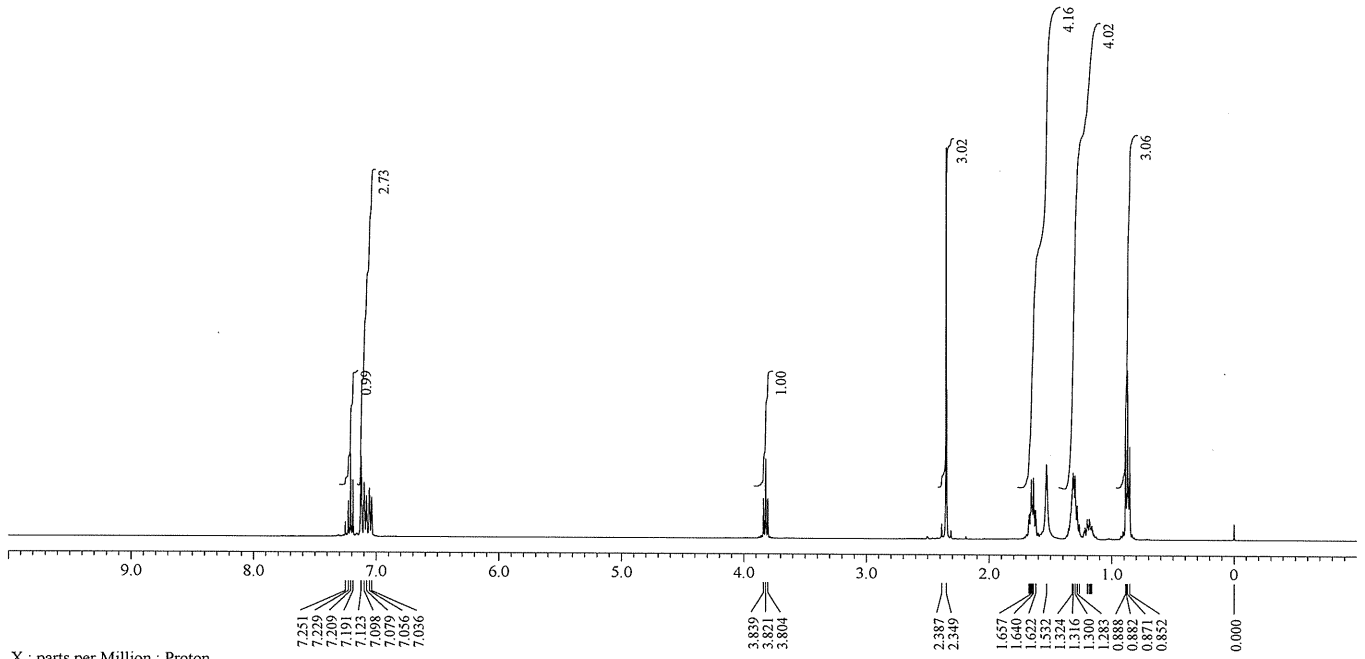

<sup>1</sup>H NMR, 400 MHz, CDCl<sub>3</sub>

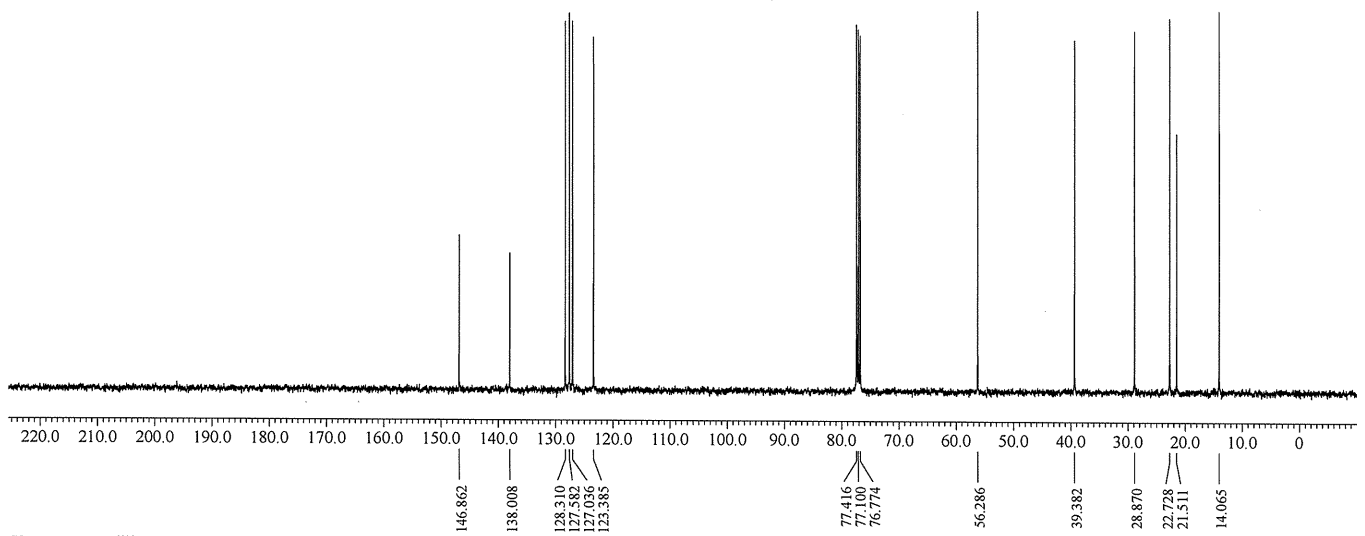

<sup>13</sup>C NMR, 100 MHz, CDCl<sub>3</sub>

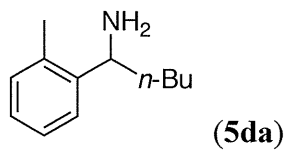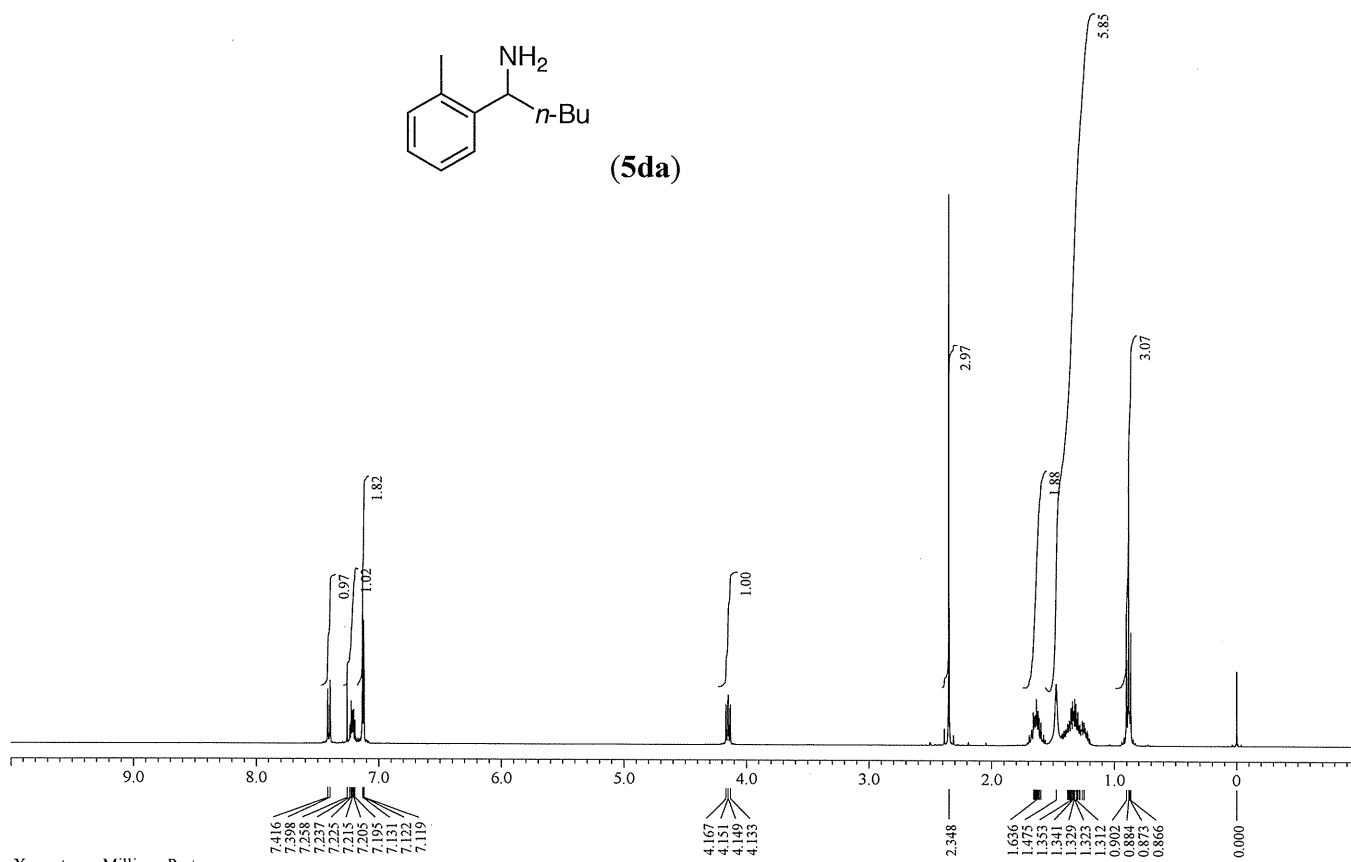

X : parts per Million : Proton

$^1\text{H}$  NMR, 400 MHz,  $\text{CDCl}_3$

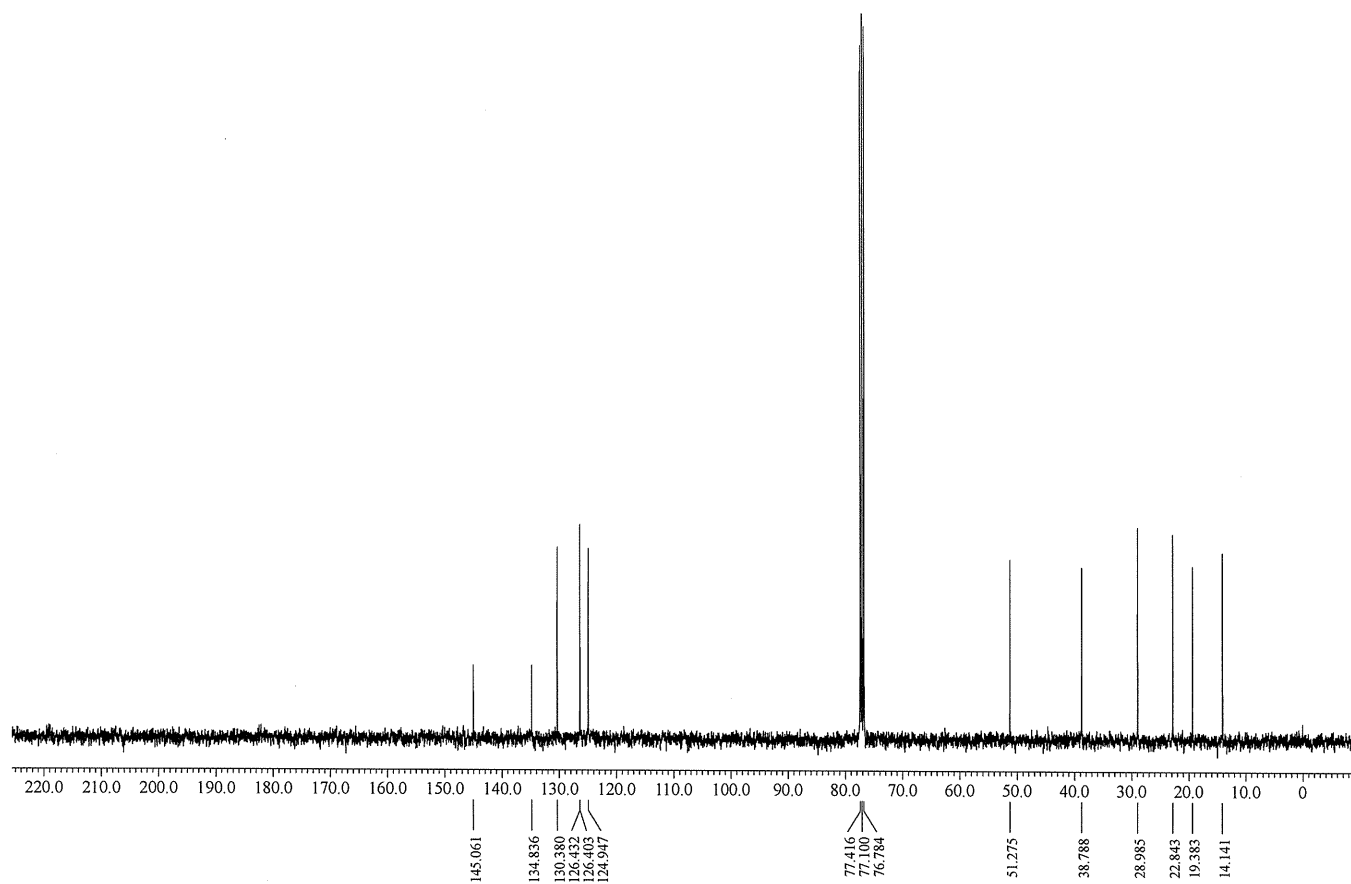

X : parts per Million : Carbon13

$^{13}\text{C}$  NMR, 100 MHz,  $\text{CDCl}_3$



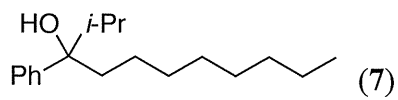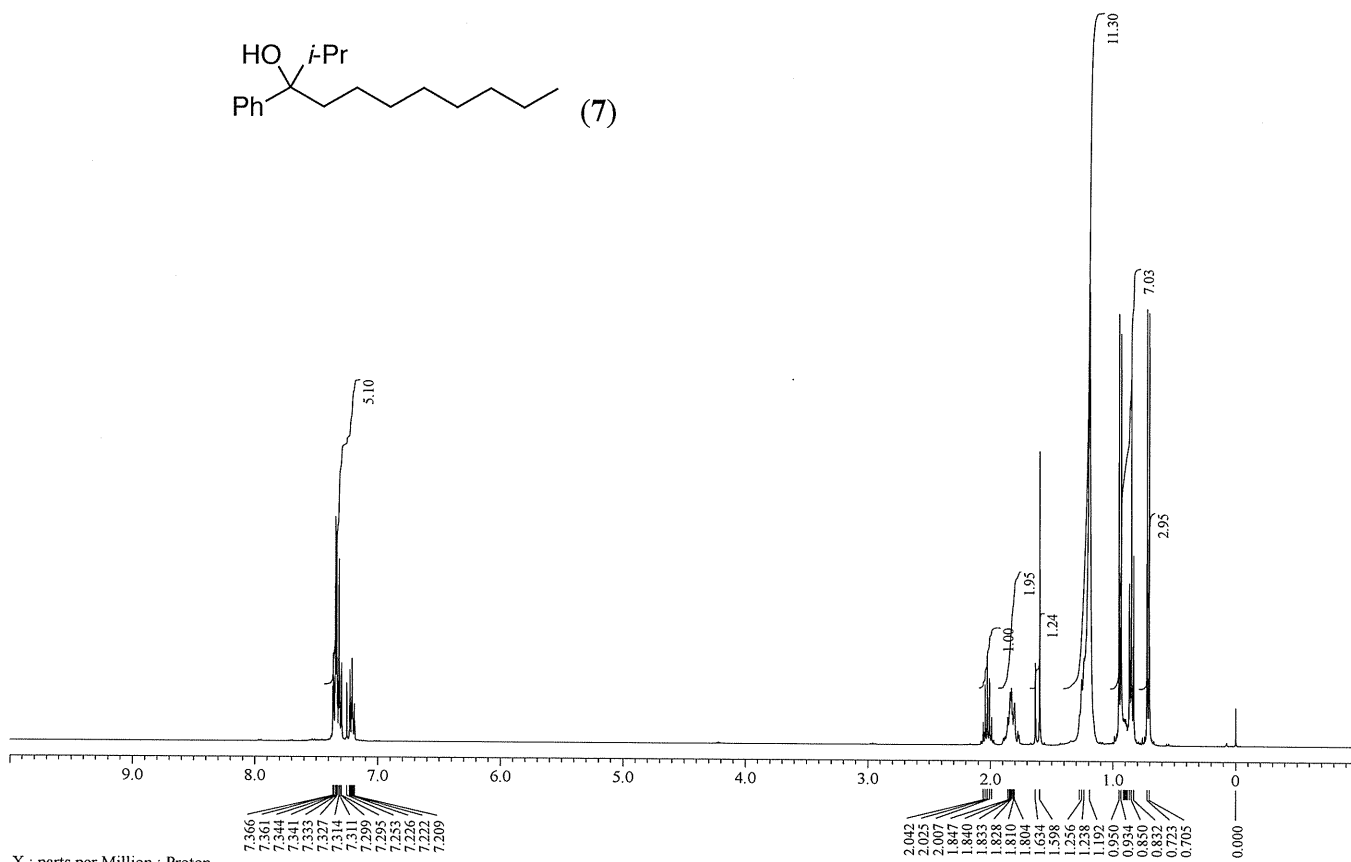

$^1\text{H}$  NMR, 400 MHz,  $\text{CDCl}_3$

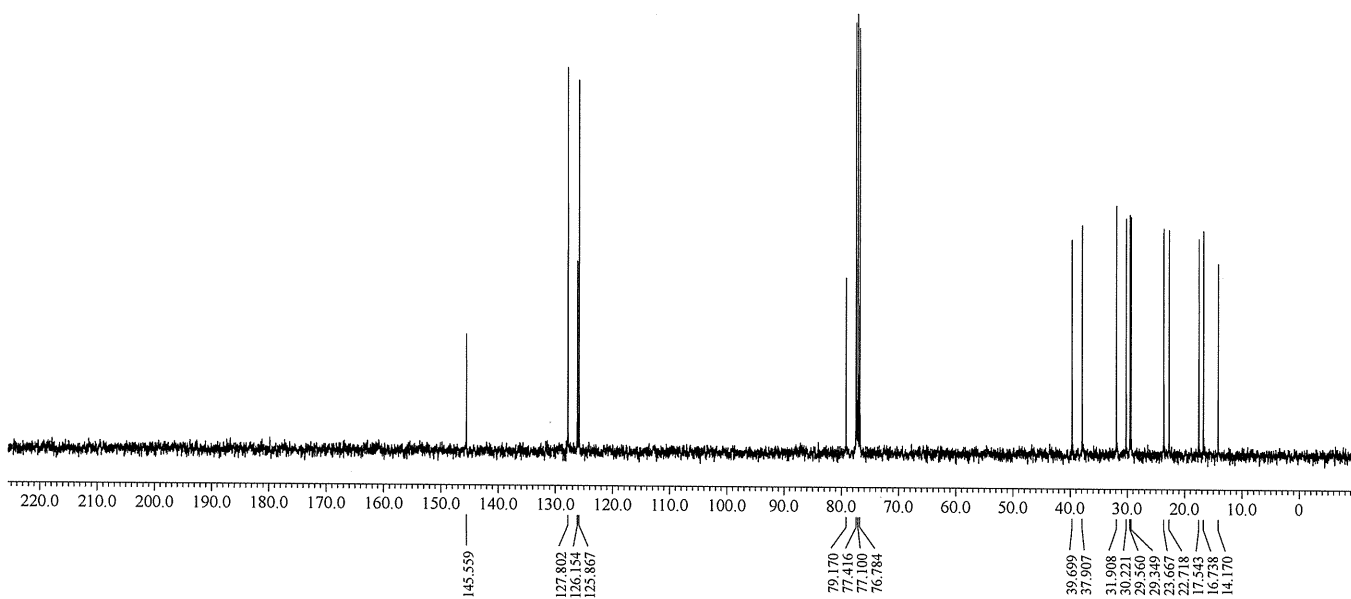

$^{13}\text{C}$  NMR, 100 MHz,  $\text{CDCl}_3$
